# Supplementary material for: Meta-Analysis of Yield-Related and N-Responsive Genes Reveals Chromosomal Hotspots, Key Processes and Candidate Genes for Nitrogen-Use Efficiency in Rice
Source: Front Plant Sci. 2021 Jun 8;12:627955. doi: 10.3389/fpls.2021.627955 (PMC8217879; doi:10.3389/fpls.2021.627955)
Supplement: Supplementary Table S1 — Details of the 16 rice N-responsive microarray transcriptomic data sets used in this study. [file Data_Sheet_1.xlsx]

## Sheet: Table S1
	Supplementary Table S1: Details of the sixteen rice N-responsive microarray transcriptomic datasets used in this study
	S.N	GSE number	Description	Reference
	1	GSE 4409	Dissecting the rice genes responsible for long time changes of nitrogen supply forms and nitrogen starvation	Xu G, Li B, Satoh K, Shen Q, Kikuchi S (2006)
	2	GSE 39687	Nitrogen-efficient rice over-expressing alanine aminotransferase	Beatty PH, Shrawat AK, Carroll RT, Zhu T et al. Transcriptome analysis of nitrogen-efficient rice over-expressing alanine aminotransferase. Plant Biotechnol J 2009 Aug;7(6):562-76. PMID: 19508275
	3	GSE 61370	Transcript analysis of nitrogen response in rice”	Coneva V, Simopoulos C, Casaretto JA, El-Kereamy A et al. Metabolic and co-expression network-based analyses associated with nitrate response in rice. BMC Genomics 2014 Dec 3;15:1056. PMID: 25471115
	4	GSE109649	Early molecular events associated with nitrogen deficiency in rice seedling roots	Hsieh PH, Kan CC, Wu HY, Yang HC et al. Early molecular events associated with nitrogen deficiency in rice seedling roots. Sci Rep 2018 Aug 15;8(1):12207. PMID: 30111825
	5	GSE 73772	Gene expression profile of rice shoot in response to nitrogen deficiency condition”	Takehisa H, Sato Y. Transcriptome monitoring visualizes growth stage-dependent nutrient status dynamics in rice under field conditions. Plant J 2019 Mar;97(6):1048-1060. PMID: 30481387
	6	GSE 59438	N-starvation and supplementation in weedy red rice	Sales MA, Burgos NR, Song JJ, Ren Y, de los Reyes BG (2014)
	7	GSE66807	Lack of ACTPK1, an STY kinase, enhances ammonium uptake and use, and promotes growth of rice seedlings under sufficient external ammonium	Beier MP, Obara M, Taniai A, Sawa Y et al. Lack of ACTPK1, an STY kinase, enhances ammonium uptake and use, and promotes growth of rice seedlings under sufficient external ammonium. Plant J 2018 Mar;93(6):992-1006. PMID: 29356222
	8	GSE 12940	Whole Genome Segregation of light and nitrate effect in rice plants	Pathak RR, Jangam AP, Malik A, Sharma N et al. Transcriptomic and network analyses reveal distinct nitrate responses in light and dark in rice leaves (Oryza sativa Indica var. Panvel1). Sci Rep 2020 Jul 22;10(1):12228. PMID: 32699267
	9	GSE62164	Transcriptome profiling of rice G-alpha mutant and WT in response to nitrate treatment	Jangam, A.P., Pathak, R.R. and Raghuram, N., 2016. Microarray analysis of rice d1 (RGA1) mutant reveals the potential role of G-protein alpha subunit in regulating multiple abiotic stresses such as drought, salinity, heat, and cold. Frontiers in plant science, 7, p.11.
	10	GSE140257	Nitrate or urea responsive microarray in a pair of contrasting rice genotypes	Sharma N and Raghuram N (data submitted only, not published)
	11	GSE66935	Gene expression profile of rice shoot in response to macronutrient deficiency	Takehisa H, Sato Y, Antonio B, Nagamura Y. Coexpression Network Analysis of Macronutrient Deficiency Response Genes in Rice. Rice (N Y) 2015 Dec;8(1):59. PMID: 26206757
	12	GSE 73766	Gene expression profile of leaf in rice grown under paddy field with macronutrient deficiencies”	Takehisa H, Sato Y. Transcriptome monitoring visualizes growth stage-dependent nutrient status dynamics in rice under field conditions. Plant J 2019 Mar;97(6):1048-1060. PMID: 30481387
	13	GSE 73768	Gene expression profile of rice shoot in response to macronutrient excess conditions”	Takehisa H, Sato Y. Transcriptome monitoring visualizes growth stage-dependent nutrient status dynamics in rice under field conditions. Plant J 2019 Mar;97(6):1048-1060. PMID: 30481387
	14	GSE 73767	Gene expression profile of rice root in response to macronutrient deficiency	Takehisa H, Sato Y. Transcriptome monitoring visualizes growth stage-dependent nutrient status dynamics in rice under field conditions. Plant J 2019 Mar;97(6):1048-1060. PMID: 30481387
	15	GSE48549	Nitrogen-efficient rice over-expressing alanine aminotransferase at three different N concentrations	Perrin H. Beatty, Rebecka T. Carroll, Ashok K. Shrawat, David Guevara, Allen G. Good. Physiological analysis of nitrogen-efficient rice overexpressing alanine aminotransferase under different N regimes. Botany, 2013, 91:866-883, 10.1139/cjb-2013-0171
	16	GSE71492	Microarray based differential transcriptomics study to understand arsenic-thiourea interaction in rice.	Srivastava AK, Jadhav P, Sablok G, Srivastava S, Suprasanna P

## Sheet: Table S2
	Supplementary Table S2: NUE- related genes (1,064) along with their chromosomal locations,Log2FC value (from N- responsive transcriptome data), P value, traits, key words and references
	S.N	Gene ID	chromosome	Log2FC*	P value**	Gene symbol	Description /trait/Key word	Database/Reference
	1	Os01g0100700	1	-1.63	6.21e-09	S5	dwarf,seed	Ricyer DB
	2	Os01g0102300	1	-1.63414	0.0248355	OsTLP27	leaf	FunRice
	3	Os01g0102900	1	3.73693	0.023683	LIR1, Lir1	Light-regulated protein, Regulation of light-dependent attachment of LEAF-TYPE FERREDOXIN-NADP+ OXIDOREDUCTASE (LFNR) to the thylakoid membrane (Os01t0102900-01)	rapdb
	4	Os01g0103100	1	-1.66535	1.22e-05	NPF6.1	TO:0001032 - relative panicle number, TO:0000371 - yield trait, TO:0000011 - nitrogen sensitivity	Oryzabase
	5	Os01g0109300	1	-1.48698	0.00230271	WFSL1	white fine stripe leaf 1	rapdb
	6	Os01g0114100	1	-2.19762	0.0110376	RLCK5	TO:0006001 - salt tolerance, TO:0000653 - seed development trait, TO:0000621 - inflorescence development trait, TO:0000276 - drought tolerance	Oryzabase
	7	Os01g0114300	1	-1.29907	7.32e-07	RLCK6	TO:0006001 - salt tolerance, TO:0000621 - inflorescence development trait, TO:0000653 - seed development trait	Oryzabase
	8	Os01g0118300	1	4.09464	0.00386579	SUI1	TO:0000420 - fertility related trait, TO:0000040 - panicle length, TO:0000300 - glucose content, TO:0000346 - tiller number, TO:0002641 - acid detergent fiber, TO:0000207 - plant height, TO:0000145 - internode length, TO:0000397 - grain size	Oryzabase
	9	Os01g0125800	1	-1.7631	0.000608379	AIP1	Dwarf	OGRO databse
	10	Os01g0134500	1	1.99729	0.0258468	OsSTE1, OsDWF7	Sterol methyltransferase 1, Dwarf 7	rapdb
	11	Os01g0136200	1	-3.9015	0.0145753	HSP16.9B	TO:0000259 - heat tolerance	Oryzabase
	12	Os01g0142300	1	-1.02955	1.62e-06	SQD2.2	TO:0002661 - seed maturation, TO:0000102 - phosphorus sensitivity, TO:0000180 - spikelet fertility, TO:0000346 - tiller number, TO:0000290 - flavonoid content	Oryzabase
	13	Os01g0142800	1	2.18	4.69e-07	OsPTR7|OsNPF8.1	grain	FunRice
	14	Os01g0147200	1	2.21052	0.00093133	IWS1, ASD1	C-terminus family protein, Responsible for the dwarf nature with least penalty on yield (Os01t0147200-01);Similar to IWS1 C-terminus family protein. (Os01t0147200-02)	rapdb
	15	Os01g0147900	1	1.49864	0.00454063	TPI|OsTPI1.1	leaf	rapdb
	16	Os01g0165000	1	1.01511	0.0410047	DREB2A	seed	Ricyer DB
	17	Os01g0177400	1	-1.91462	1.64e-05	D18, d18-h (d18-I, d18h), dwf15, d25, d18, d18-k, d18-AD, d18-dy, OsGA3ox2, ga3ox2, OsGA3OX2, GA3OX2, GA3ox-2	GA 3 beta-hydroxylase2, GA metabolism (Os01t0177400-01)	rapdb
	18	Os01g0178500	1	-1.93899	0.00149	OsIAA1	Dwarf	OGRO databse
	19	Os01g0179400	1	4.29842	0.00071805	SSG4	grain	FunRice
	20	Os01g0192000	1	4.50317	0.00381412	DOS, OsDOS, OsC3H2, C3H2, OsTZF2, OsCCCH-Zn-4	CCCH-type zinc finger protein, Negative regulator for leaf senescence (Os01t0192000-01);Similar to C3H transcription factor. (Os01t0192000-02)	rapdb
	21	Os01g0192900	1	1.00324	0.0202	OS-ACS5|OsACS5	leaf	FunRice
	22	Os01g0195000	1	-0.95203	0.0265563	IDD2	TO:0000207 - plant height, TO:0000731 - lignin content	Oryzabase
	23	Os01g0197700	1	-3.84388	4.82e-06	Gn1a|OsCKX2	tiller	FunRice
	24	Os01g0201700	1	-1.86175	0.00157	OSMADS3	flower	FunRice
	25	Os01g0202700	1	-2.10774	0.0156518	FT-L 8, OsFTL8	FT-like gene 8	rapdb
	26	Os01g0206700	1	2.25846	3.29e-05	CIPK05	TO:0000114 - flooding related trait, TO:0000303 - cold tolerance	Oryzabase
	27	Os01g0208600	1	-1.04362	1.12e-06	ES1, TUT1, OsSCAR1, SCAR1,TUT1/OsSCAR1	SCAR-like protein 2, Component of the suppressor of cAMP receptor/Wiskott-Aldrich syndrome protein family verprolin-homologous (SCAR/WAVE) complex, Actin organization, Panicle development, Regulation of water loss (Os01t0208600-01);Actin-binding WH2 domain containing protein. (Os01t0208600-02);Actin-binding WH2 domain containing protein. (Os01t0208600-03)	rapdb
	28	Os01g0208700	1	1.49	0.000343	Osppc4	leaf	FunRice
	29	Os01g0209200	1	-1.20229	0.00581372	GF14G	TO:0000303 - cold tolerance, TO:0006001 - salt tolerance, TO:0000276 - drought tolerance, TO:0000615 - abscisic acid sensitivity	Oryzabase
	30	Os01g0218500	1	-2.4778	5.36e-07	OsFTL1	Similar to ZCN14 protein. (Os01t0218500-01);FLOWERING LOCUS T (FT)-Like homolog, FT-Like1 homologous to Arabidopsis Flowering Locus T gene, Promotion of flowering (Os01t0218500-02);Similar to ZCN14 protein. (Os01t0218500-03);Non-protein coding transcript. (Os01t0218500-04)	rapdb
	31	Os01g0221600	1	2.05087	9.98e-06	OsALMT4	grain	FunRice
	32	Os01g0223600	1	-1.27747	0.044528	OsSRLK	Leucine-rich repeat (LRR)-type receptor-like kinase, Regulation of chlorophyll degradation and leaf senescence (Os01t0223600-01)	rapdb
	33	Os01g0224700	1	-1.36713	6.61e-08	YUCCA4	TO:0000615 - abscisic acid sensitivity, TO:0002672 - auxin content	Oryzabase
	34	Os01g0227100	1	2.03004	0.00169578	NYC1, nyc1, OsNYC1	Chlorophyll b reductase, Leaf senescence (Os01t0227100-01);Similar to oxidoreductase. (Os01t0227100-02)	rapdb
	35	Os01g0227300	1	4.13484	0.0209776	OsRab7	yield	EL-Esawi and Alayafi, 2019
	36	Os01g0229400	1	-1.08125	0.0270928	OsRac1	grain	FunRice
	37	Os01g0257300	1	-3.36109	0.00404	OsRAA1	flower	FunRice
	38	Os01g0262600	1	-1.00112	0.00847	OsGT1	grain	FunRice
	39	Os01g0263300	1	1.33964	0.0117	OsPOX1|ddOs319	flower	FunRice
	40	Os01g0264000	1	2.80654	0.00738324	RDD1	flower	FunRice
	41	Os01g0265000	1	-1.27929	0.000634746	OsGGR2, LYL2, OsGGRII	Geranylgeranyl reductase, &alpha;-tocopherol synthesis (Os01t0265000-01)	rapdb
	42	Os01g0265200	1	-1.78513	3.85e-05	OsPAPST1	Mitochondrial carrier protein, Early leaf development (Os01t0265200-01)	rapdb
	43	Os01g0273800	1	4.94864	0.0103595	OsYUC9	grain	FunRice
	44	Os01g0279100	1	1.17	0.01	OsCRD1, PNZIP, YGL8, YL-1	Subunit of magnesium-protoporphyrin IX monomethyl ester cyclase (EC:1.14.13.81), Core component of FLU-YGL8-LCAA-POR complex, Chlorophyll biosynthesis, Chloroplast development (Os01t0279100-01);Similar to Magnesium-protoporphyrin ix monomethyl ester cyclase (Fragment). (Os01t0279100-02)	rapdb
	45	Os01g0286100	1	1.11588	2.9e-05	OsPIL15	tiller angle	Xie et al. 2018
	46	Os01g0286900	1	-1.07846	1.19e-06	OsIAA4	tiller	FunRice
	47	Os01g0292700	1	-1.08922	0.000395	OsIF	photosynthetic efficiency,yield	Soda et al. 2018
	48	Os01g0293000	1	1.04117	0.00103	OsSAMS3	S-adenosyl-l-methionine synthetase, Histone H3K4me3 and DNA methylation, Regulation of gene expression related to flowering (Os01t0293000-01)	rapdb
	49	Os01g0293100	1	1.68062	0.000626	bHLH142	Panicle flower	OGRO databse
	50	Os01g0302500	1	-1.16654	2.15e-07	OSH6	leaf	FunRice
	51	Os01g0307500	1	-1.30258	0.000111	OsHKT1;5|SKC1|OsHKT8	leaf	FunRice
	52	Os01g0323100	1	2.93972	0.0218337	RLCK33	TO:0000653 - seed development trait, TO:0000621 - inflorescence development trait	Oryzabase
	53	Os01g0348900	1	3.85191	5.42e-09	SALT	paniclenumber,seed	Ricyer DB
	54	Os01g0367100	1	2.30848	0.00765069	PHD1	grain	FunRice
	55	Os01g0382000	1	1.78288	0.0019703	OsPR1b	leaf	FunRice
	56	Os01g0385400	1	-3.07206	0.0146355	SLAC7	TO:0000137 - days to heading, TO:0000605 - hydrogen peroxide content, TO:0002667 - abscisic acid content, TO:0000316 - photosynthetic ability, TO:0000492 - leaf shape, TO:0000495 - chlorophyll content, TO:0002655 - starch grain size, TO:0000075 - light sensitivity, TO:0000207 - plant height, TO:0000227 - root length, TO:0000089 - panicle type	Oryzabase
	57	Os01g0388000	1	6.70065	0.00478922	CYP734A6	Dwarf	OGRO databse
	58	Os01g0495900	1	-2.49	0.0011	CAF1	TO:0000605 - hydrogen peroxide content, TO:0000496 - carotenoid content, TO:0000295 - chlorophyll-b content, TO:0000293 - chlorophyll-a content, TO:0000316 - photosynthetic ability, TO:0002715 - chloroplast development trait, TO:0000326 - leaf color	Oryzabase
	59	Os01g0511600	1	1.08229	0.0494385	OsPLGG1	tiller	FunRice
	60	Os01g0527600	1	-4.16153	0.031256	SHL2	TO:0000432 - temperature response trait, TO:0000164 - stress trait, TO:0000615 - abscisic acid sensitivity, TO:0002718 - awn anatomy and morphology trait, TO:0000274 - floret anatomy and morphology trait, TO:0000064 - embryo related trait, TO:0000148 - viral disease resistance	Oryzabase
	61	Os01g0547600	1	-1.77207	0.000951572	NRT2.4	productivity	Ricyer DB
	62	Os01g0557500	1	1.06548	0.0090113	OsCAX1a	flower	FunRice
	63	Os01g0559500	1	1.0346	0.0272886	WSL	Pentatricopeptide repeat (PPR) protein, Splicing of chloroplast mRNA, Chloroplast development, Abiotic stress response (Os01t0559500-01)	rapdb
	64	Os01g0566100	1	-10.3963	0.00028915	OsELF3.2, ELF3_chr.1, OsELF3-2	Conserved hypothetical protein. (Os01t0566100-01);Ortholog of Arabidopsis ELF3, Regulation of flowering time (Os01t0566100-02)	rapdb
	65	Os01g0588500	1	6.23696	0.0136056	RLCK40	TO:0000074 - blast disease, TO:0000621 - inflorescence development trait, TO:0000653 - seed development trait	Oryzabase
	66	Os01g0588900	1	2.51413	1.71e-10	LOG	Tillers,panicle branching	Kurohaet al., 2009
	67	Os01g0600900	1	2.51413	1.71e-10	CAB2R	TO:0002715 - chloroplast development trait	Oryzabase
	68	Os01g0614900	1	-1.62338	0.00327	OsATG7	Dwarf	OGRO databse
	69	Os01g0615100	1	1.87025	0.0121	OCPI1	grain	FunRice
	70	Os01g0626400	1	1.6063	0.029257	WRKY11, OsWRKY11.2	WRKY transcription factor, Control of flowering time and plant height (Os01t0626400-01);WRKY transcription factor, Splicing variant (Os01t0626400-02)	rapdb
	71	Os01g0633100	1	-1.04984	0.00762	AGPL2, OsAGPL2, osagpl2, APL2, OsAPL2, AGPiso, sh2, Sh2	ADP-glucose pyrophosphorylase large subunit, Controll of starch biosynthesis in endosperm development (Os01t0633100-01)	rapdb
	72	Os01g0633500	1	2.39929	8.46e-06	Rd	Seed	OGRO databse
	73	Os01g0645400	1	-1.18354	0.0274	OsYUCCA1	Dwarf	OGRO databse
	74	Os01g0646300	1	1.06783	5.56e-05	SLRL1	Dwarf	OGRO databse
	75	Os01g0648000	1	-1.35787	2.34e-08	OsAKT1	leaf	FunRice
	76	Os01g0670800	1	1.8587	0.0371259	OsETT2|OsETTIN2	leaf	FunRice
	77	Os01g0678500	1	1.15725	0.00240995	TPC1	TO:0000207 - plant height	Oryzabase
	78	Os01g0680200	1	-1.76763	1.93e-06	BG3	grain size	FunRice
	79	Os01g0681900	1	1.31	0.00223	GLT1	TO:0000346 - tiller number, TO:0000371 - yield trait, TO:0000329 - tillering ability, TO:0000152 - panicle number	Oryzabase
	80	Os01g0682001	1	1.25421	0.00130676	nadh-gogat1	Dwarf	OGRO DB
	81	Os01g0683100	1	1.12842	0.05257	DGL1|OsKTN60	leaf	FunRice
	82	Os01g0683500	1	3.1105	9.12e-08	SUI3	TO:0000207 - plant height, TO:0000145 - internode length	Oryzabase
	83	Os01g0686800	1	-1.1	3.16e-07	OsRACK1A	Seed	OGRO DB
	84	Os01g0703600	1	3.02709	0.04498	SPL28	Clathrin-associated adaptor protein complex 1 medium subunit mu1 (AP1M1), Regulation of vesicular trafficking, Disease resistance (Os01t0703600-01);Similar to clathrin adaptor complexes medium subunit family protein. (Os01t0703600-02)	rapdb
	85	Os01g0704100	1	2.13289	2.07e-06	NRT2.3	TO:0000015 - oxygen sensitivity, TO:0000276 - drought tolerance, TO:0000396 - grain yield, TO:0006032 - panicle size, TO:0000547 - primary branch number, TO:0000557 - secondary branch number, TO:0000445 - seed number, TO:0000180 - spikelet fertility, TO:0000511 - phosphorus uptake	Oryzabase
	86	Os01g0707500	1	2.73858	0.00037942	OsbHLH118	basic helix-loop-helix protein 118	rapdb
	87	Os01g0710200	1	2.73858	0.00037942	OsPAO1|PAO1	flower	FunRice
	88	Os01g0718300	1	1.7014	4.13129e-05	D61	biomass and grain production	Morinaka et al. 2006
	89	Os01g0719100	1	-1.47957	0.000853	OsRZFP34	leaf	FunRice
	90	Os01g0726400	1	3.03212	0.0281504	CFO1|OsMADS32	flower	FunRice
	91	Os01g0727500	1	-4.31602	0.029977	OsS40-7	A member of S40 gene family, Leaf senescence (Os01t0727500-02)	rapdb
	92	Os01g0749200	1	1.28807	1.84e-08	WLP1, cp rpl13, cp RPL13	Chloroplast ribosome L13 protein, Chloroplast development under low temperature conditions (Os01t0749200-01)	rapdb
	93	Os01g0750300	1	6.313	0.0359764	BC7	TO:0000011 - nitrogen sensitivity, TO:0000051 - stem strength, TO:0000460 - light intensity sensitivity	Oryzabase
	94	Os01g0751600	1	3.37776	0.00658271	THIS1, This1	Class III lipase, Regulation of tillering, plant height, and spikelet fertility (Os01t0751600-01)	rapdb
	95	Os01g0757200	1	1.5221	5.41e-06	GA2OX3	TO:0002677 - brassinosteroid sensitivity, TO:0000207 - plant height	Oryzabase
	96	Os01g0765000	1	2.974	0.040444	ST2, st2(gw), gw, st2	Putative dCMP deaminase, Chloroplast development (Os01t0765000-01);Similar to deoxycytidylate deaminase. (Os01t0765000-02)	rapdb
	97	Os01g0769700	1	1.67594	0.0278505	DRUS2, YK1, OsCrRLK1L5	Receptor-like kinase, Control of reproductive growth and development, Repression of cell death (Os01t0769700-01);Similar to predicted protein. (Os01t0769700-02)	rapdb
	98	Os01g0769900	1	4.16733	0.00452642	OsTCM1	TO:0000326 - leaf color, TO:0000293 - chlorophyll-a content, TO:0000295 - chlorophyll-b content, TO:0000303 - cold tolerance, TO:0002715 - chloroplast development trait	Oryzabase
	99	Os01g0775400	1	4.32408	0.0032877	CKX5	grainshape,grainlength,seed	Ricyer DB
	100	Os01g0785400	1	-1.62874	1.3e-06	LC1	LEAF INCLINATION 1	rapdb
	101	Os01g0788400	1	1.61287	1.45e-06	PME6	TO:0000249 - leaf senescence, TO:0002668 - jasmonic acid content	Oryzabase
	102	Os01g0795000	1	2.33862	4.77e-07	RSP1	flower	FunRice
	103	Os01g0804400	1	-1.95513	4.49e-09	CYP94D7	TO:0006001 - salt tolerance, TO:0000621 - inflorescence development trait	Oryzabase
	104	Os01g0805600	1	3.41446	0.0163658	Orysa;CycB1;1	Seed	OGRO databse
	105	Os01g0808100	1	-2.99952	0.0447223	OsTGA2	leaf	FunRice
	106	Os01g0812000	1	2.48449	0.0341262	OsMYBGA|OsGAMYB	flower	FunRice
	107	Os01g0813100	1	-1.35805	0.00725	BZIP9	TO:0002616 - flowering time, TO:0000137 - days to heading	Oryzabase
	108	Os01g0826400	1	-1.32	0.00299	OsWRKY24	grain	FunRice
	109	Os01g0834400	1	-1.10528	0.000399121	HAP3A	TO:0002715 - chloroplast development trait	Oryzabase
	110	Os01g0839200	1	2.92948	0.0485955	OsDSR2	leaf	FunRice
	111	Os01g0841700	1	3.65594	0.00286555	Rpp17|OsERG1	tiller	FunRice
	112	Os01g0847200	1	-1.22382	0.0023	OsMPG1|OsVTC1-1	grain	FunRice
	113	Os01g0848400	1	2.31416	0.0145365	qSH1	TO:0000473 - grain shattering, TO:0000207 - plant height, TO:0000145 - internode length, TO:0006014 - phyllotaxy, TO:0006020 - shoot apical meristem development, TO:0000142 - secondary branching of inflorescence, TO:0000547 - primary branch number	Oryzabase
	114	Os01g0851000	1	1.22137	0.0144826	WLP2, OsFLN1	Carbohydrate/purine kinase domain containing protein. (Os01t0851000-01);Plastid-encoded RNA polymerase (PEP)-associated protein, Protection of chloroplast development from heat stress, Chloroplast biogenesis and plant growth (Os01t0851000-02)	rapdb
	115	Os01g0853400	1	1.32	2.58e-08	OsCOI1a, OsCOI1, Os_F0728	Component of the SCF E3 ubiquitin ligase complex, Jasmonate-regulated defense responses, Promoting leaf senescence (Os01t0853400-01)	rapdb
	116	Os01g0859300	1	5.05936	1.26e-09	ABI5	seed	Ricyer DB
	117	Os01g0862600	1	1.26708	9.42e-09	OsS40-9	A member of S40 gene family, Leaf senescence (Os01t0862600-01)	rapdb
	118	Os01g0867300	1	1.28488	0.00124	OsABF1|OsABI5|OREB1|OsbZIP10	panicle	FunRice
	119	Os01g0869200	1	-1.12998	1.08e-06	OsMGT1	leaf	FunRice
	120	Os01g0874100	1	1.98276	0.00602097	OsdNK2	Hypothetical conserved gene. (Os01t0874100-01);Deoxynucleoside kinase family protein. (Os01t0874100-02);Deoxyribonucleoside kinase, WSL8 (white stripe leaf 8) homolog (Os01t0874100-03)	rapdb
	121	Os01g0878400	1	1.05095	4.66e-05	OsAAP5	Amino acid permease, Regulation of tiller number and grain yield (Os01t0878400-01)	rapdb
	122	Os01g0878700	1	-2.08292	6.02e-09	OsAAP6|qPC1	grain	FunRice
	123	Os01g0883100	1	-1.03698	3.64e-06	Pi2 and Pi5	yield	KrishnaMurth et al. 2016
	124	Os01g0883800	1	1.65202	1.83e-05	SD1	yield	Spielmeyer et al. 2002
	125	Os01g0884300	1	-1.09843	0.0487375	OsNAC6|SNAC2	grain	FunRice
	126	Os01g0887100	1	-2.4	0.00279	CMS	grainsize,dwarf,productivity,seed	Ricyer DB
	127	Os01g0889400	1	-2.12699	0.0228617	AS2	paniclenumber	Ricyer DB
	128	Os01g0894300	1	3.69445	0.00544673	OsFKI	grain	FunRice
	129	Os01g0897600	1	2.98	1.11e-08	Os1BGlu4	leaf	FunRice
	130	Os01g0898300	1	2.42455	0.0411467	OsSPR1	Mitochondrial protein, Root development and iron homeostasis (Os01t0898300-01);Hypothetical conserved gene. (Os01t0898300-02)	rapdb
	131	Os01g0900400	1	-1.6704	0.00497	EG1	TO:0001007 - coleoptile length, TO:0006022 - floral organ development trait, TO:0000079 - lemma and palea anatomy and morphology trait, TO:0000657 - spikelet anatomy and morphology trait, TO:0002668 - jasmonic acid content, TO:0000544 - mesocotyl length, TO:0000173 - ethylene sensitivity	Oryzabase
	132	Os01g0908600	1	3.12445	0.0014084	OsProT1	leaf	FunRice
	133	Os01g0909100	1	-2.04342	0.00150797	HDT702	Dwarf	OGRO databse
	134	Os01g0911700	1	1.21748	0.0234	OSVP1|VP1	flower	FunRice
	135	Os01g0914400	1	5.7845	0.0358168	OsEPFL9, STOMAGEN	Orthologue of Arabidopsis EPFL9, Regulation of leaf stomatal density (Os01t0914400-01)	rapdb
	136	Os01g0915600	1	-1.1037	1.12e-06	TA1	TO:0000206 - leaf angle	Oryzabase
	137	Os01g0917500	1	-1.03981	2.45e-06	MSP1	seed	Ricyer DB
	138	Os01g0919400	1	-3.04051	0.00706553	sps1|SPS|OsSPS1	leaf	FunRice
	139	Os01g0919900	1	2.51341	0.00964949	OsSSI2	leaf	FunRice
	140	Os01g0922800	1	-1.03009	0.00399472	MADS51, OsMADS51, OsMADS65, MADS65	MADS-box transcription factor, Short-day flowering promoter (Os01t0922800-01)	rapdb
	141	Os01g0927600	1	1.1041	0.0006645	OsARF4, OsARF2	Auxin response factor (ARF) family protein, Transcription factor, Negative regulation of grain size and weight (Os01t0927600-01)	rapdb
	142	Os01g0930800	1	1.26726	4.09e-07	BGLU5	TO:0000485 - sterility related trait, TO:0000137 - days to heading	Oryzabase
	143	Os01g0932500	1	2.6578	0.0101084	HAK6	Biochemical character, Reproductive organ - Spikelet, flower, glume, awn	Oryzabase
	144	Os01g0934300	1	3.32962	0.00989013	NA	Similar to Flowering-time protein isoform alpha. (Os01t0934300-01);Similar to Flowering-time protein isoform alpha. (Os01t0934300-02);Similar to Flowering-time protein isoform alpha. (Os01t0934300-03);Similar to Flowering-time protein isoform alpha. (Os01t0934300-04)	rapdb
	145	Os01g0940000	1	-1.17543	0.000154	OsCKX4	leaf	FunRice
	146	Os01g0942300	1	2.067	0.000715	OsEGL2	panicle	FunRice
	147	Os01g0949400	1	1.05948	0.0145021	SE13	TO:0000137 - days to heading, TO:0002616 - flowering time, TO:0000152 - panicle number, TO:0000371 - yield trait	Oryzabase
	148	Os01g0952800	1	3.29291	4.94e-07	OsIRO2|OsbHLH056	flower	FunRice
	149	Os01g0957000	1	1.56022	0.0269	NADK1	TO:0000276 - drought tolerance, TO:0000207 - plant height, TO:0006002 - proline content, TO:0000303 - cold tolerance, TO:0002657 - oxidative stress, TO:0000095 - osmotic response sensitivity, TO:0000259 - heat tolerance, TO:0006001 - salt tolerance, TO:0000495 - chlorophyll content, TO:0002637 - leaf size	Oryzabase
	150	Os01g0968800	1	-1.33238	0.00335	DREB1F	seed	Ricyer DB
	151	Os01g0971800	1	3.93417	0.0313358	OsPCL1	Transcription factor with a GARP DNA-binding domain, Photoperiodic control of flowering time, Clock associated-component (Os01t0971800-01)	rapdb
	152	Os01g0976800	1	-2.0206	0.00339403	GATA10	TO:0000437 - male sterility	Oryzabase
	153	Os02g0102300	2	-1.36567	0.010665	OsHAC1;1	grain	FunRice
	154	Os02g0103800	2	1.01	0.0154	OsLFNR1, LFNR1	Leaf-type ferredoxin-NADP+-oxidoreductase, Regulation of electron partitioning in the chloroplast (Os02t0103800-01);Similar to Ferredoxin NADP+ reductase (EC 1.18.1.2) (Fragment). (Os02t0103800-02);Similar to Ferredoxin--NADP reductase. (Os02t0103800-03)	rapdb
	155	Os02g0106100	2	1.57716	0.009306	OSINV3|OsVIN2	grain	FunRice
	156	Os02g0112100	2	-8.102	3.9e-09	NRT2.1	productivity	Ricyer DB
	157	Os02g0116600	2	1.02416	0.008243	BHLH59	TO:0000326 - leaf color, TO:0000224 - iron sensitivity, TO:0000172 - jasmonic acid sensitivity	Oryzabase
	158	Os02g0117400	2	4.95055	0.0140205	SPP1	paniclenumber	Ricyer DB
	159	Os02g0117700	2	1.24113	0.000217	OsUgp2|Ugp2	grain	FunRice
	160	Os02g0120500	2	-1.40267	0.011	TDR	Reproductive organ - Spikelet, flower, glume, awn	Oryzabase
	161	Os02g0121000	2	1.81486	0.0536781	cde1(t)	Dwarf	OGRO databse
	162	Os02g0126400	2	-5.09794	0.008074	OsCPK4	Dwarf	OGRO databse
	163	Os02g0134300	2	1.03	0.00197	OsTEF1	Tiller	Paul et al. 2012
	164	Os02g0135900	2	2.91262	0.0500158	OsGBP	grain	FunRice
	165	Os02g0139000	2	-1.30712	3.12e-06	OsPHR3	grain	FunRice
	166	Os02g0139400	2	1.53506	0.0169591	LCRN1	TO:0000207 - plant height, TO:0000346 - tiller number, TO:0001013 - lateral root number	Oryzabase
	167	Os02g0140300	2	-1.65871	0.0103585	CNX6	TO:0000095 - osmotic response sensitivity, TO:0006001 - salt tolerance, TO:0000492 - leaf shape, TO:0002661 - seed maturation, TO:0000370 - leaf width, TO:0000253 - seed dormancy	Oryzabase
	168	Os02g0141300	2	-1.09606	0.000902125	CAP1	grain	FunRice
	169	Os02g0143200	2	1.71224	0.0010222	SRL2-like gene, semi-rolled leaf 2-like gene	Armadillo-type fold domain containing protein. (Os02t0143200-01)	rapdb
	170	Os02g0152900	2	1.3359	2.76e-06	YL1	Nucleus-encoded chloroplast protein, Chloroplast development, Biogenesis of chloroplast ATP synthase (Os02t0152900-01)	rapdb
	171	Os02g0154000	2	-1.1451	2.28e-06	LRK2	Leucine-rich repeat receptor-like kinase, Positive regulation of the drought stress response and tiller development (Os02t0154000-01)	rapdb
	172	Os02g0154100	2	-1.38252	3.16e-08	lncRNA LAIR	grain yield	Wang et al. 2018
	173	Os02g0154200	2	-1.61455	1.64e-06	LRK1	yield component	Zha et al. 2009
	174	Os02g0168800	2	-2.01	0.00289	HEMC	seed	Ricyer DB
	175	Os02g0170300	2	-1.12596	0.0126	OsMADS29	grain	FunRice
	176	Os02g0171100	2	5.02702	0.0065825	GAPDH	dwarf	Ricyer DB
	177	Os02g0177600	2	1.30098	0.00046	4CL3	TO:0000160 - UV light sensitivity, TO:0000731 - lignin content, TO:0000733 - lignin biosynthesis trait, TO:0000011 - nitrogen sensitivity, TO:0000051 - stem strength	Oryzabase
	178	Os02g0184900	2	-1.43843	3.66e-07	OsCYP71D8L	grain	FunRice
	179	Os02g0187800	2	2.29977	0.000278262	GH2|OsCAD2	panicle	FunRice
	180	Os02g0202200	2	-1.27696	3.67e-07	OsSPX2, SPX2	SPX domain-containing protein, Pi-dependent inhibition of phosphate starvation responses, Negative regulation of leaf inclination (Os02t0202200-01)	rapdb
	181	Os02g0204700	2	-1.58061	2.3e-08	CYP734A2	Dwarf	OGRO databse
	182	Os02g0214900	2	1.69	0.00489	HDA703	Seed	OGRO databse
	183	Os02g0215200	2	1.13	0.00448	HDA710	Dwarf	OGRO databse
	184	Os02g0218600	2	1.92617	0.0246101	RLCK69	TO:0000621 - inflorescence development trait	Oryzabase
	185	Os02g0218700	2	-2.90612	0.0256194	OsAOS3|OsHPL2	leaf	FunRice
	186	Os02g0218800	2	1.86924	0.0189324	OsAOS4|OsHPL1	leaf	FunRice
	187	Os02g0219400	2	-1.22822	0.0477056	DF	TO:0000051 - stem strength, TO:0000145 - internode length, TO:0000432 - temperature response trait, TO:0000731 - lignin content, TO:0000333 - sugar content	Oryzabase
	188	Os02g0221900	2	2.68132	0.0231426	OsMAX1e	tillering	Xiu-mei et al. 2015
	189	Os02g0252400	2	3.85539	1.91e-06	RPBF, OsDof3, OsDOF3, OsEnS-34, OsDof10, Dof10, OsDof-10, OsDOF1, DOF1, DOF3	Dof zinc finger transcriptional activator, Dof zinc finger transcription factor, Grain filling, GA response in aleurone cell (Os02t0252400-01)	rapdb
	190	Os02g0259600	2	1.24354	5.16e-09	ASL2	leaf	FunRice
	191	Os02g0272200	2	1.04549	0.0151	OsYUC12	grain	FunRice
	192	Os02g0274100	2	3.81	1.09e-08	MFP	seed	Ricyer DB
	193	Os02g0290500	2	-1.36231	1.2e-09	OsUbDK&gamma;4, OsUbDKg4	Phosphatidylinositol 3-/4-kinase (PI3/4K) family protein, Ubiquitin-like domain kinase, Control of flowering time (Os02t0290500-01);Similar to phosphatidylinositol 3- and 4-kinase family protein. (Os02t0290500-02)	rapdb
	194	Os02g0293300	2	1.47859	0.0034	OsFDML1	flower	FunRice
	195	Os02g0301100	2	1.66469	0.0318585	SWEET4	TO:0000249 - leaf senescence, TO:0002661 - seed maturation, TO:0000163 - auxin sensitivity, TO:0000167 - cytokinin sensitivity, TO:0000100 - shrunken endosperm, TO:0000166 - gibberellic acid sensitivity, TO:0000333 - sugar content	Oryzabase
	196	Os02g0306401	2	1.82342	0.0467651	OsNAAT1	seed	Ricyer DB
	197	Os02g0437200	2	1.62755	0.041788	OsSNAP32	flower	FunRice
	198	Os02g0462800	2	-1.31791	0.039	WRKY42, OsWRKY42	WRKY transcription factor 42, Transcriptional repressor, Promotion of leaf senescence (Os02t0462800-01)	rapdb
	199	Os02g0477700	2	-3.92994	0.0495064	D12	DWARF YUKARA DWARF OR FUKEI 71	rapdb
	200	Os02g0513100	2	-5.85039	0.012532	SWEET11 and 15	seed filling	Yang et al. 2018
	201	Os02g0516400	2	-1.11757	2.82e-08	CFL1	leaf	FunRice
	202	Os02g0521300	2	1.38	2.98e-06	BON1	TO:0000346 - tiller number, TO:0000074 - blast disease, TO:0000175 - bacterial blight disease resistance, TO:0000255 - sheath blight disease resistance, TO:0000259 - heat tolerance, TO:0000207 - plant height	Oryzabase
	203	Os02g0528200	2	-1.64368	7.29e-10	RBE3	grainsize,grainweight,seed	Ricyer DB
	204	Os02g0531600	2	1.27321	0.000189	RCN2	TFL1/CEN ortholog, Phosphatidylethanolamine-binding protein, PEBP family protein, Control of the phase transition of meristem, Control of flowering time (Os02t0531600-01)	rapdb
	205	Os02g0532500	2	-1.96342	0.0305779	OsGLP2-1	leaf	FunRice
	206	Os02g0536500	2	3.0753	0.00432444	ACL2	ABAXIALLY CURLED LEAF 2	rapdb
	207	Os02g0537700	2	1.99048	0.0276466	BAS1|OsTPX|OsPRX2	leaf	FunRice
	208	Os02g0538000	2	-1.69	0.000939	LAS	TO:0002715 - chloroplast development trait, TO:0000326 - leaf color, TO:0000495 - chlorophyll content	Oryzabase
	209	Os02g0550600	2	-4.72144	0.0138238	Oscyt-inv1	Flowering	OGRO databse
	210	Os02g0554000	2	-1.23	0.00205	SDG725	TO:0000145 - internode length, TO:0000137 - days to heading, TO:0002616 - flowering time, TO:0002688 - leaf lamina joint bending, TO:0000397 - grain size, TO:0000456 - spikelet number, TO:0000391 - seed size, TO:0000206 - leaf angle, TO:0000207 - plant height	Oryzabase
	211	Os02g0568200	2	5.05465	0.00566771	CPT1	TO:0000159 - blue light sensitivity, TO:0000075 - light sensitivity, TO:0002651 - shoot phototropism, TO:0002652 - root phototropism, TO:0002650 - phototropism, TO:0000158 - red light sensitivity	Oryzabase
	212	Os02g0569900	2	-5.47772	0.0281763	CYP76M7	TO:0002675 - gibberellic acid content, TO:0000207 - plant height	Oryzabase
	213	Os02g0570400	2	-1.12152	0.0043	KS7	TO:0000357 - growth and development trait, TO:0000074 - blast disease, TO:0000207 - plant height, TO:0000599 - enzyme activity, TO:0000172 - jasmonic acid sensitivity, TO:0002675 - gibberellic acid content	Oryzabase
	214	Os02g0573200	2	-1.15106	0.0309235	OsCRY1a, OsCRY1, CRY1a, CRY2	Similar to Cryptochrome 1. (Os02t0573200-01);Cryptochrome 1a, blue light photoreceptor, Regulation of blue light-mediated de-etiolation, Blue light-dependent inhibition of coleoptile and leaf elongation (Os02t0573200-02)	rapdb
	215	Os02g0576600	2	2.63162	0.00553	OsSUT5|OsSUT5Z	leaf	FunRice
	216	Os02g0579600	2	1.84977	1.18e-06	MADS27	TO:0000168 - abiotic stress trait, TO:0000148 - viral disease resistance	Oryzabase
	217	Os02g0580300	2	-1.05187	8.27e-07	GID2, gid2, GF14e, OsGF14e, OsGID2	Similar to 14-3-3 protein 6. (Os02t0580300-01);Similar to 14-3-3 protein 6. (Os02t0580300-02);Similar to 14-3-3 protein 6. (Os02t0580300-03);F-box protein, Positive regulator of GA signaling (Os02t0580300-04)	rapdb
	218	Os02g0595900	2	-2.44305	7.45e-08	OsNAR2.1	grain	FunRice
	219	Os02g0606000	2	-4.09	0.000481	OsDG2	Glycine-rich protein (GRP), Regulation of chloroplast development at early leaf stage (Os02t0606000-01)	rapdb
	220	Os02g0606700	2	2.84648	0.00296747	RSS1	leaf	FunRice
	221	Os02g0610500	2	1.68085	0.0432986	OsCOL4, OsD, OsBBX5, OsCOL4/OsD, OsCCT06	CO-like protein containing two B-box zinc finger domains and one CCT domain, Constitutive flowering repressor (Os02t0610500-01)	rapdb
	222	Os02g0618200	2	1.11665	0.00243253	OsPRR1, OsTOC1, OsPRR1/OsTOC1	Circadian-associated rice pseudo response regulator, Control of flowering time (Os02t0618200-01)	rapdb
	223	Os02g0618400	2	-1.08623	0.00158	OsMPS	Seed	OGRO databse
	224	Os02g0621300	2	-1.3309	0.0520893	CER1	TO:0002657 - oxidative stress, TO:0000437 - male sterility, TO:0000621 - inflorescence development trait, TO:0000276 - drought tolerance, TO:0000709 - leaf gloss	Oryzabase
	225	Os02g0625000	2	-1.68	0.00642	OsCRY2, CRY2	Cryptochrome 2, blue light photoreceptor, Promotion of flowering time (Os02t0625000-01);Similar to Cryptochrome 2. (Os02t0625000-02)	rapdb
	226	Os02g0626100	2	1.74922	0.00279998	PAL1	TO:0000653 - seed development trait, TO:0000424 - brown planthopper resistance, TO:0000074 - blast disease, TO:0000731 - lignin content, TO:0000733 - lignin biosynthesis trait, TO:0000624 - allelopathic effect, TO:0000160 - UV light sensitivity, TO:0000021 - copper sensitivity, TO:0000031 - silicon sensitivity, TO:0000175 - bacterial blight disease resistance, TO:0000011 - nitrogen sensitivity, T…	Oryzabase
	227	Os02g0629800	2	2.36515	8.77e-06	CAL1	Defensin-like protein, Positive regulation of Cd accumulation in rice leaves, Mediation of Cd efflux from cytosol into extracellular spaces via chelation (Os02t0629800-01)	rapdb
	228	Os02g0630300	2	3.04421	2.5e-06	GA2ox9	Dwarf	OGRO databse
	229	Os02g0641000	2	2.84789	4.88e-06	OsPLIM2a	tiller	FunRice
	230	Os02g0643200	2	3.25345	0.00067743	YAB4	TO:0000621 - inflorescence development trait	Oryzabase
	231	Os02g0644000	2	-1.71463	5.31e-09	OsVPE3|REP-2	leaf	FunRice
	232	Os02g0648100	2	1.91472	0.00605	RLCK79	TO:0000621 - inflorescence development trait, TO:0000653 - seed development trait	Oryzabase
	233	Os02g0649300	2	3.5242	8.46e-06	HOX24, Oshox24, OsHox24, OsSLI1	HD-ZIP I protein, Transcription activator, Stress response, Panicle development (Os02t0649300-01)	rapdb
	234	Os02g0649900	2	2.5801	0.0001	OsYSL2	grain	FunRice
	235	Os02g0650300	2	3.30081	6.03e-07	OsYSL15	flower	FunRice
	236	Os02g0650500	2	-1.71334	3.65e-09	RLCK80	TO:0000074 - blast disease, TO:0000175 - bacterial blight disease resistance, TO:0000276 - drought tolerance, TO:0000621 - inflorescence development trait, TO:0000653 - seed development trait, TO:0006001 - salt tolerance	Oryzabase
	237	Os02g0654700	2	-1.17402	0.0185119	AP59|OsBIERF3|OsAP59	flower	FunRice
	238	Os02g0656600	2	1.98261	0.0161489	OsDREB4-1|CR223	leaf	FunRice
	239	Os02g0662700	2	-2.38	0.000792	HAM1	TO:0006020 - shoot apical meristem development, TO:0006021 - vegetative to reproductive phase transition trait, TO:0000137 - days to heading, TO:0002616 - flowering time	Oryzabase
	240	Os02g0663100	2	1.40278	0.0411	HAM2	TO:0002616 - flowering time, TO:0006020 - shoot apical meristem development, TO:0006021 - vegetative to reproductive phase transition trait, TO:0000137 - days to heading	Oryzabase
	241	Os02g0673100	2	-1.27021	1.16e-07	OsALMT7	YIELD	Heng et al. 2018
	242	Os02g0699000	2	3.91427	8.75e-10	OsNPF7.2	grain width	Jia et al. 2019
	243	Os02g0700700	2	6.05178	0.00636876	OsBRXL1	panicle	FunRice
	244	Os02g0701300	2	2.7362	0.0519945	GS2	grain length, seed development	Lee et al. 2018;Hu et al., 2015
	245	Os02g0705500	2	1.64495	0.0139779	OsBLR1	bHLH transcription factor, Regulation of brassinosteroid signalling, Regulation of leaf angle and grain length (Os02t0705500-01);Helix-loop-helix DNA-binding domain containing protein. (Os02t0705500-02)	rapdb
	246	Os02g0707000	2	-1.03198	0.0437836	OsMDHAR4	leaf	FunRice
	247	Os02g0724000	2	2.79557	0.00330916	DTH2|OsCOL9|OsCCT08	flower	FunRice
	248	Os02g0725700	2	1.37239	0.0390323	HAP3E	TO:0000137 - days to heading, TO:0000485 - sterility related trait, TO:0000276 - drought tolerance, TO:0000064 - embryo related trait	Oryzabase
	249	Os02g0730000	2	3.01238	0.00503689	ALDH2a|OsALDH2B5	leaf	FunRice
	250	Os02g0731200	2	-1.2502	0.0530539	OsMADS57	tillers	Guo et al., 2013
	251	Os02g0731700	2	1.51346	2.61e-06	OsBBX8, OsK, OsCCT09, OsGhd2, OsK/Ghd2, BBX8, CCT09, Ghd2	B-box-containing protein 8, CCT domain-containing gene 9, CCT (CO, CO-LIKE and TOC1) domain protein 9, CCT domain protein 9, "Grain number, plant height, and heading date2", CONSTANS-like 1 protein	rapdb
	252	Os02g0732400	2	1.63788	0.000494	TIFY8	Tolerance and resistance - Stress tolerance, Reproductive organ - Spikelet, flower, glume, awn	Oryzabase
	253	Os02g0735200	2	1.00188	0.000746	OsGS1;1	Glutamine synthetase shoot isozyme (EC 6.3.1.2) (Glutamate--ammonia ligase) (Clone lambda-GS28). (Os02t0735200-01);Cytosolic glutamine synthetase, Growth rate, Grain filling (Os02t0735200-02);Glutamine synthetase shoot isozyme (EC 6.3.1.2) (Glutamate--ammonia ligase) (Clone lambda-GS28). (Os02t0735200-03)	rapdb
	254	Os02g0743400	2	2.13463	0.0373155	OsPIN1|REH1|PIN1b|OsPIN1b	tiller	FunRice
	255	Os02g0744700	2	2.16794	9.31e-06	SSII-2	grainlength	Ricyer DB
	256	Os02g0744900	2	1.1	0.00671	LYL1, OsChl P, OsGGRI, OsGGR1	Geranylgeranyl reductase (EC:1.3.1.83), Chlorophyll and &alpha;-tocopherol synthesis, Response to light stress, Protection of photooxidative damage (Os02t0744900-01)	rapdb
	257	Os02g0745100	2	-1.57857	0.00980238	Lsi1|OsNIP2;1|OsLsi1	grain	FunRice
	258	Os02g0747900	2	1.00331	0.00326	OsBUL1	grain size	Zhang et al. 2011
	259	Os02g0749300	2	1.21108	1.68e-06	OsSK1	panicle	FunRice
	260	Os02g0751900	2	1.61654	6.83e-06	D50	Dwarf	OGRO databse
	261	Os02g0755000	2	-2.60706	0.00252	OsTSD2|OsQUA2	grain	FunRice
	262	Os02g0757100	2	-1.35284	4.67e-06	OsPHI-1	Dwarf	OGRO databse
	263	Os02g0761000	2	1.0269	2.74e-06	OsMADS22	flower	FunRice
	264	Os02g0762400	2	7.46967	0.0077742	KRP1	grain	FunRice
	265	Os02g0762600	2	2.15785	1.16e-05	SGL1	SG1 (SHORT GRAIN1)-related protein, Brassinosteroid signaling, Regulation of seed and panicle development (Os02t0762600-01)	rapdb
	266	Os02g0763000	2	1.62728	0.0318522	TGW2	grain	FunRice
	267	Os02g0768600	2	0.977314	0.0385455	PPA6	TO:0000095 - osmotic response sensitivity, TO:0000481 - alkali sensitivity, TO:0001027 - net photosynthetic rate, TO:0000495 - chlorophyll content, TO:0000328 - sucrose content, TO:0000696 - starch content, TO:0006002 - proline content, TO:0000333 - sugar content, TO:0000525 - sodium to potassium content ratio, TO:0002673 - amino acid content, TO:0000207 - plant height, TO:0000143 - relative biom…	Oryzabase
	268	Os02g0770800	2	4.18	1.35e-05	OsNIA1|OsNia1|OsNR2	tiller	FunRice
	269	Os02g0771100	2	-1.15349	2.56e-07	PPS, COP1	Ortholog of Arabidopsis CONSTITUTIVE PHOTOMORPHOGENIC1, Regulation of the onset of the adult phase, Regulation of vegetative-reproductive phase change and the time of flowering (Os02t0771100-01);Similar to CopI. (Os02t0771100-02);Similar to COP1 (Fragment). (Os02t0771100-03)	rapdb
	270	Os02g0776600	2	1.77501	7.08e-08	Big Grain3,	grain size	Xiao et al. 2018
	271	Os02g0777800	2	1.08929	0.0422082	RLCK86	TO:0000303 - cold tolerance, TO:0000074 - blast disease, TO:0000175 - bacterial blight disease resistance, TO:0000653 - seed development trait, TO:0000621 - inflorescence development trait	Oryzabase
	272	Os02g0780500	2	2.59512	0.0109246	OsSTA80	SRL2-like gene, semi-rolled leaf 2-like gene	rapdb
	273	Os02g0783700	2	-4.05211	0.00136282	OsLKR|SDH	grain	FunRice
	274	Os02g0787200	2	1.87059	0.0367053	RLCK87	TO:0000621 - inflorescence development trait	Oryzabase
	275	Os02g0793900	2	-1.14501	3.13e-07	HDR1	Ubiquitous nuclear protein, Regulation of photoperiodic flowering (Os02t0793900-01)	rapdb
	276	Os02g0795300	2	-7.59	5.15e-05	NCA1B	TO:0000326 - leaf color	Oryzabase
	277	Os02g0802700	2	-1.03144	1.07e-08	OsMGD|OsMGD2	flower	FunRice
	278	Os02g0805250	2	3.58109	0.00200756	OsbHLH107	grain size	Yang et al. 2018
	279	Os02g0810200	2	2.5341	0.0192369	STD1	Kinesin-related protein, Regulation of cell division and plant development (Os02t0810200-01)	rapdb
	280	Os02g0811000	2	-2.59643	2.12e-05	BEAK-SHAPED GRAIN 1/TRIANGULAR HULL 1	grain shape, size and weight	Wei et al. 2013
	281	Os02g0813500	2	-1.84229	0.00275247	OsGR2|RGRC2	leaf	FunRice
	282	Os02g0814200	2	8.18271	0.0248927	OsGL1-6	leaf	FunRice
	283	Os02g0817900	2	-2.75203	3.38e-09	CYP97A4	leaf	FunRice
	284	Os02g0819100	2	-1.33277	0.00452016	OsDHHC1	DHHC-type zinc finger protein, Regulation of plant architecture by altering the tiller (Os02t0819100-01);DHHC-type zinc finger protein, Regulation of plant architecture by altering the tiller (Os02t0819100-02)	rapdb
	285	Os02g0819400	2	-1.88887	0.0504	LPA1	angle,productivity	Ricyer DB
	286	Os02g0820500	2	1.06533	7.19e-06	DH1	leaf	FunRice
	287	Os02g0831500	2	1.69087	0.0481984	RSUS6	TO:0000396 - grain yield, TO:0000590 - grain weight, TO:0000696 - starch content, TO:0000449 - grain yield per plant, TO:0000592 - 1000-dehulled grain weight	Oryzabase
	288	Os02g0832800	2	2.08	2.91e-08	GnT1	tiller	FunRice
	289	Os02g0833500	2	1.74476	0.0178822	CHX1	Biochemical character, Reproductive organ - Spikelet, flower, glume, awn	Oryzabase
	290	Os04g0663800	2	5.15332	0.00601	PIN1	angle,dwarf,grainweight	Ricyer DB
	291	Os03g0101200	3	-1.62649	8.1e-09	RLCK93	TO:0000175 - bacterial blight disease resistance, TO:0000621 - inflorescence development trait, TO:0000074 - blast disease	Oryzabase
	292	Os03g0103100	3	1.25644	4.56e-06	Ltp1	leaf	FunRice
	293	Os03g0103300	3	1.46313	0.0403	qLTG3-1	seed	Ricyer DB
	294	Os03g0107300	3	-1.12415	6.81e-07	Lsi2|OsLsi2	grain	FunRice
	295	Os03g0109400	3	1.24758	0.0144793	OSHB1|LF1	leaf	FunRice
	296	Os03g0110800	3	3.07686	0.00294654	OsDRM2	tiller	FunRice
	297	Os03g0113900	3	2.29526	0.046627	OsS40-4	A member of S40 gene family, Leaf senescence, Response to pathogen infection (Os03t0113900-02)	rapdb
	298	Os03g0122600	3	1.13197	0.0121	OsMADS50, OsSOC1, AGL20	MIKC-type MADS-box protein, Flowering activator, Short-day/long-day promotion of flowering (Os03t0122600-01);Transcription factor, MADS-box domain containing protein. (Os03t0122600-02)	rapdb
	299	Os03g0123300	3	2.66661	0.0195274	TAD1	tiller	Xu et al. 2011
	300	Os03g0123500	3	2.30058	0.00286593	KNAT7	grain	FunRice
	301	Os03g0128700	3	1.14351	4.04e-06	OsCDPK1|OsCDPK13|OsCDPK11|OsCPK11|OsCDPK12	flower	FunRice
	302	Os03g0130900	3	-1.81712	1.46e-09	RLCK96	TO:0000175 - bacterial blight disease resistance, TO:0000621 - inflorescence development trait	Oryzabase
	303	Os03g0131200	3	-1.6035	0.0227997	CATC, OsCat, OsCatC, OsCATC, NOE1, noe1, catC, OsCATC	Catalase, Hydrogen peroxide-induced leaf cell death (Os03t0131200-01);Similar to Catalase isozyme 2 (EC 1.11.1.6). (Os03t0131200-02)	rapdb
	304	Os03g0131900	3	2.3521	0.0124637	OscpSRP43, cpSRP43	Chloroplast signal recognition particle 43 KD protein, Chloroplast development and photosynthesis (Os03t0131900-01)	rapdb
	305	Os03g0132800	3	-0.951262	0.0240382	RLCK98	TO:0000653 - seed development trait, TO:0000621 - inflorescence development trait, TO:0000074 - blast disease, TO:0000175 - bacterial blight disease resistance, TO:0000276 - drought tolerance	Oryzabase
	306	Os03g0133400	3	1.72049	1.06e-08	CEBiP|OsCEBiP	leaf	FunRice
	307	Os03g0140200	3	1.18021	0.0207436	CYP96B5, WSL5	Similar to Cytochrome P450 86A1 (EC 1.14.-.-) (CYPLXXXVI) (P450-dependent fatty acid omega-hydroxylase). (Os03t0140200-01);Cytochrome P450 family member, Leaf cuticular wax synthesis (Os03t0140200-02)	rapdb
	308	Os03g0140300	3	-2.10766	0.000448	OsCYP96B4, CYP96B4, CYP96B4/SD37, OsDSS1, DSS1	Cytochrome P450 96B4, P-450 96B4, semi-dwarf 37	rapdb
	309	Os03g0140400	3	-1.50375	4.19e-05	SD37, OsCYP96B4, CYP96B4, CYP96B4/SD37, OsDSS1, DSS1	Cytochrome P450 protein CYP96B4, Growth regulation, Drought stress response (Os03t0140400-01)	rapdb
	310	Os03g0142800	3	-1.06803	0.00737	OsMRP5	Seed	OGRO databse
	311	Os03g0146400	3	-2.01582	0.00120451	OsPAO, PAO	Pheophorbide a oxygenase, Leaf senescence, Wound responses (Os03t0146400-01);Similar to Lethal leaf-spot 1 (Fragment). (Os03t0146400-02)	rapdb
	312	Os03g0150800	3	4.07888	0.0350843	OsPht1;2|OsPT2	grain	FunRice
	313	Os03g0151800	3	2.13979	0.0449085	OsCDC48	tiller	FunRice
	314	Os03g0157300	3	1.57125	0.0271653	OsMCA1	dwarf	Ricyer DB
	315	Os03g0160100	3	1.19127	0.0063213	ACDR1, SPL3, OsEDR1, OsACDR1, EDR1	Mitogen-activated protein kinase kinase kinase (MAPKKK), Disease resistance, Defense/stress response (Os03t0160100-01)	rapdb
	316	Os03g0161900	3	1.67995	0.0440468	HSFA2D	TO:0000567 - tiller angle, TO:0002693 - gravity response trait, TO:0000075 - light sensitivity	Oryzabase
	317	Os03g0165400	3	4.88092	0.0277244	OsBGal1	leaf	FunRice
	318	Os03g0169600	3	-4.50334	2.28e-05	RDD4, OsDof12, Dof12, OsDof-12, OsCDF1, OsCDF1/OsDOF12, OsDOF12, CDF1, DOF12	Dof (DNA binding with one finger) transcription factor, Regulation of Flowering time, Brassinosteroid (BR) signaling to modulate plant architecture (Os03t0169600-01)	rapdb
	319	Os03g0170900	3	3.64412	0.00015832	OsSUT1	grain filling,yield	Ishibashi et al. 2013
	320	Os03g0171600	3	2.05003	0.00705497	OsFBK12, OsFbox130, Os_F0642	F-box protein containing a Kelch repeat motif, Reguration of leaf senescence, seed size and grain number (Os03t0171600-01);Kelch-type beta propeller domain containing protein. (Os03t0171600-02);Similar to kelch motif family protein. (Os03t0171600-03)	rapdb
	321	Os03g0175800	3	2.49604	0.0532861	Big Grain1	grain shape, size and weight	Wei et al. 2013
	322	Os03g0179400	3	-1.04911	0.0322736	GUDK	YIELD	Ramegowda et al. 2016
	323	Os03g0180800	3	-1.03	0.00229	TIFY11A	TO:0000040 - panicle length, TO:0000207 - plant height, TO:0000180 - spikelet fertility, TO:0000137 - days to heading, TO:0002736 - flower number, TO:0000576 - stem length, TO:0000397 - grain size, TO:0000590 - grain weight, TO:0006001 - salt tolerance, TO:0000172 - jasmonic acid sensitivity	Oryzabase
	324	Os03g0180900	3	-1.39	0.00268	TIFY11C	TO:0002757 - flag leaf length, TO:0002759 - grain number, TO:0000040 - panicle length, TO:0000172 - jasmonic acid sensitivity, TO:0000207 - plant height, TO:0000180 - spikelet fertility, TO:0000137 - days to heading, TO:0002736 - flower number, TO:0000576 - stem length, TO:0000397 - grain size, TO:0000590 - grain weight	Oryzabase
	325	Os03g0181100	3	-1.0714	0.00011	TIFY11b	grain size	Hakata et al. 2012
	326	Os03g0182800	3	-1.15536	0.0328039	OsEBP-89	flower	FunRice
	327	Os03g0183000	3	-1.37546	0.0155291	OsLG3	rice grain length and yield	Yu et al. 2017
	328	Os03g0183100	3	1.06864	0.0077452	OsBP-73	leaf	FunRice
	329	Os03g0186600	3	1.04	5.35e-07	OsMDP1	leaf	FunRice
	330	Os03g0186900	3	2.96378	0.046078	OsAP25	flower	FunRice
	331	Os03g0187500	3	1.11822	0.0431893	OsAFB6	grain	FunRice
	332	Os03g0190100	3	1.26983	3.03e-07	PPT1	grainsize	Ricyer DB
	333	Os03g0203200	3	1.61979	1.87e-07	D14	tillers	Ishikawa et al., 2005; Ariteet al., 2009; Guo et al., 2013
	334	Os03g0215400	3	-2.10136	1.68e-05	OsLG3b|OsMADS1|LHS1|AFO	flower	FunRice
	335	Os03g0216700	3	2.78	1.27e-06	OsFRDL1	grain	FunRice
	336	Os03g0218400	3	3.69353	0.00199	OsMST4	grain	FunRice
	337	Os03g0220100	3	-1.03492	1e-05	WSL4, CER6/CUT1, CER6, CUT1, OsCER6	beta-ketoacyl-CoA synthase, Homolog of Arabidopsis CER6, Leaf cuticular wax synthesis, Very-long-chain fatty acid (VLCFA) elongation (Os03t0220100-01)	rapdb
	338	Os03g0223400	3	2.02615	7.97e-09	GLN1;2|GS1;2|OsGS1;2	tiller	FunRice
	339	Os03g0225200	3	1.52463	4.99e-07	SDS|OsSDS	flower	FunRice
	340	Os03g0225900	3	-2.78871	6.52e-08	OsAOS2	flower	FunRice
	341	Os03g0226200	3	7.65118	6.32e-06	Hb2	TO:0000008 - potassium sensitivity, TO:0000621 - inflorescence development trait, TO:0000095 - osmotic response sensitivity, TO:0000605 - hydrogen peroxide content, TO:0000006 - calcium sensitivity, TO:0000480 - nutrient sensitivity, TO:0000609 - potassium content	Oryzabase
	342	Os03g0227700	3	5.39944	0.0331152	OsDWF4	grain yield	Li et al. 2018
	343	Os03g0232600	3	1.50231	0.0202374	ELF1, OsPUB31, OsPUB75, TUD1, OsTUD1	U-Box E3 ubiquitin ligase, Regulation of brassinosteroid-mediated growth (Os03t0232600-01)	rapdb
	344	Os03g0236966	3	1.1544	0.0391335	Osapc6	Dwarf	OGRO databse
	345	Os03g0237100	3	2.26055	9.77e-07	OsDMAS1	seed	Ricyer DB
	346	Os03g0251350	3	1.34	0.00481	HAP5C	TO:0002616 - flowering time, TO:0000276 - drought tolerance, TO:0000615 - abscisic acid sensitivity, TO:0000696 - starch content	Oryzabase
	347	Os03g0274800	3	1.19	8.86e-07	OsRLCK107	panicle	FunRice
	348	Os03g0275900	3	3.44144	0.0474959	OsPUB10	plant U-box-containing protein 10, U-box protein 10	rapdb
	349	Os03g0276500	3	-1.02985	1.73e-06	HSP71.1	TO:0000382 - 1000-seed weight, TO:0000396 - grain yield, TO:0000653 - seed development trait, TO:0000402 - grain width	Oryzabase
	350	Os03g0281900	3	-1.33201	1.56e-08	Rcn1|OsABCG5	tiller	FunRice
	351	Os03g0283100	3	-2.73764	0.0247618	OsGSTL2	tiller	FunRice
	352	Os03g0284100	3	-2.47	0.00668	OsPRR73	Similar to Two-component response regulator-like PRR73. (Os03t0284100-01);Similar to Two-component response regulator-like PRR73. (Os03t0284100-02);Similar to Two-component response regulator-like PRR73. (Os03t0284100-03);Circadian-associated rice pseudo response regulator, Control of flowering time (Os03t0284100-04)	rapdb
	353	Os03g0284800	3	-1.05906	7.45e-07	OsTOP6A3	flower	FunRice
	354	Os03g0285800	3	1.88677	0.0205707	OsMSRMK2|OsMAP1|OsMPK5|OsMAPK2|OsMAPK5|OsBIMK1|OsMPK3	leaf	FunRice
	355	Os03g0286900	3	-2.10113	2.03e-10	OsRCI2-5	flower	FunRice
	356	Os03g0289100	3	1.42	3.84e-07	OSK5	dwarf	Ricyer DB
	357	Os03g0291500	3	4.07141	2.81e-10	OsASN1|OsAS1	tiller	FunRice
	358	Os03g0294700	3	1.51262	0.00880284	OsETOL1	Panicle flower	OGRO databse
	359	Os03g0296800	3	1.5816	0.0076646	MIT	tiller	FunRice
	360	Os03g0300400	3	-1.89923	0.0141988	JIOsPR10|OsPR10	flower	FunRice
	361	Os03g0301200	3	-1.81249	2.29e-06	BC1L1	PO:0025034 - leaf	Oryzabase
	362	Os03g0302900	3	2.96985	0.000556651	SSD1	flower	FunRice
	363	Os03g0307200	3	10.2886	7.68e-06	OsNAS2	grain	FunRice
	364	Os03g0309200	3	-3.19	0.000311	PHYB, phyB	Similar to Phytochrome B. (Os03t0309200-01);Phytochrome B, Control of deetiolation and flowering, Transduction of the night break (NB) signal to inhibit flowering, Regulation of critical day length (Os03t0309200-02)	rapdb
	365	Os03g0309400	3	1.06702	0.0266	OsPME1	grain	FunRice
	366	Os03g0320000	3	7.23697	0.00187823	SIP1;2	Biochemical character, Reproductive organ - Spikelet, flower, glume, awn	Oryzabase
	367	Os03g0325600	3	-2.07278	0.0312331	WOX6	TO:0000166 - gibberellic acid sensitivity, TO:0000620 - embryo development trait, TO:0000163 - auxin sensitivity, TO:0000303 - cold tolerance, TO:0000401 - plant growth hormone sensitivity, TO:0000167 - cytokinin sensitivity, TO:0002693 - gravity response trait, TO:0000567 - tiller angle, TO:0000276 - drought tolerance	Oryzabase
	368	Os03g0327800	3	-1.23108	4.96e-07	NAC58, OsNAP, ONAC058, ONAC58, PS1	NAC Family transcriptional activator, Abiotic stress response, Positive regulator of leaf senescence (Os03t0327800-01)	rapdb
	369	Os03g0329500	3	2.4629	0.0174483	glu1	Dwarf	OGRO databse
	370	Os03g0329900	3	-1.90552	0.0081	PHR1	productivity	Ricyer DB
	371	Os03g0331600	3	1.49091	1.32e-07	CS3	leaf	FunRice
	372	Os03g0332100	3	-1.07764	0.00129	CYP714B2	TO:0000621 - inflorescence development trait	Oryzabase
	373	Os03g0336200	3	3.92428	0.00443	RF2b|OsbZIP30	leaf	FunRice
	374	Os03g0337600	3	-2.04	0.00105	LM3	TO:0000063 - mimic response, TO:0000207 - plant height, TO:0000137 - days to heading	Oryzabase
	375	Os03g0340500	3	1.9582	5.35e-08	RSUS4	TO:0000592 - 1000-dehulled grain weight, TO:0000449 - grain yield per plant, TO:0000696 - starch content, TO:0000590 - grain weight, TO:0000396 - grain yield, TO:0006001 - salt tolerance	Oryzabase
	376	Os03g0344300	3	-1.22735	0.000806986	OsFUG1	panicle architecture	FunRice
	377	Os03g0346150	3	3.5678	0.0276006	OsSIN	leaf	FunRice
	378	Os03g0364400	3	-2.10728	0.0435557	OsBBS1, OsRLCK109	Receptor-like cytoplasmic kinase, Leaf senescence, Salt stress response (Os03t0364400-01);Similar to Phytosulfokine receptor-like protein. (Os03t0364400-02)	rapdb
	379	Os03g0369100	3	-5.91909	0.00138236	OsLTPL36	grain weight	FunRice
	380	Os03g0370000	3	1.37688	2.68e-05	pdhk	Seed	OGRO databse
	381	Os03g0390600	3	1.20626	0.0214897	H3	dwarf,seed	Ricyer DB
	382	Os03g0395000	3	-1.13639	0.000609	OsHO2, HO2, YLC2	Stroma-localized heme oxygenase 2, Tetrapyrrole biosynthesis (Os03t0395000-01);Similar to Heme oxygenase 2 (Fragment). (Os03t0395000-02)	rapdb
	383	Os03g0401300	3	1.8543	1.18e-09	RSUS1	TO:0000592 - 1000-dehulled grain weight, TO:0000449 - grain yield per plant, TO:0000696 - starch content, TO:0000590 - grain weight, TO:0000396 - grain yield	Oryzabase
	384	Os03g0402800	3	1.2	1.75e-07	TIFY10A	TO:0000576 - stem length, TO:0002736 - flower number, TO:0000137 - days to heading, TO:0000020 - black streak dwarf virus resistance, TO:0002757 - flag leaf length, TO:0002759 - grain number, TO:0000040 - panicle length, TO:0000148 - viral disease resistance, TO:0000172 - jasmonic acid sensitivity, TO:0000590 - grain weight, TO:0000207 - plant height	Oryzabase
	385	Os03g0407900	3	1.22617	8.08e-06	RLCK110	TO:0000653 - seed development trait, TO:0000621 - inflorescence development trait, TO:0000074 - blast disease, TO:0000175 - bacterial blight disease resistance, TO:0006001 - salt tolerance	Oryzabase
	386	Os03g0411100	3	-1.00358	2.48e-08	OsHAP2E	tiller number	Alam et al. 2015
	387	Os03g0413000	3	-1.25813	1.95e-07	HAP3I	TO:0002616 - flowering time	Oryzabase
	388	Os03g0413100	3	-1.43851	1.2e-06	ACR7	leaf	FunRice
	389	Os03g0416200	3	3.95036	0.0279776	BC1	PO:0020104 - leaf sheath , PO:0000077 - sclerenchyma cell , PO:0009005 - root , PO:0009015 - portion of vascular tissue , PO:0009025 - vascular leaf , PO:0009047 - stem , PO:0009049 - inflorescence , PO:0020039 - leaf lamina	Oryzabase
	390	Os03g0417700	3	3.21634	1.82e-10	GL3.2	grain length	FunRice
	391	Os03g0425000	3	2.03324	0.00839796	AL1	ALBINO LEAF 1	rapdb
	392	Os03g0437100	3	-2.146	5.45e-05	OsDRZ1	C2H2 zinc finger protein, Transcriptional repressor, Drought tolerance, Positive regulation of plant growth and productivity (Os03t0437100-01)	rapdb
	393	Os03g0437600	3	-1.05505	0.0412905	D14L	Os hydrolase, DWARF 14 LIKE, hebibaD14L	rapdb
	394	Os03g0563300	3	1.4481	1.31e-07	ELL, OsCHLI	Magnesium-chelatase subunit ChlI, Mg-chelatase I subunit, Chlorophyll biosynthesis, Chloroplast development (Os03t0563300-01)	rapdb
	395	Os03g0586900	3	-0.950467	0.0146928	PLS2	PREMATURE LEAF SENESCENCE 2	rapdb
	396	Os03g0597600	3	-1.28991	8.18e-09	ASNASE1	Biochemical character, Reproductive organ - Spikelet, flower, glume, awn	Oryzabase
	397	Os03g0602300	3	-1.51955	5.01e-08	OsBRD1, OsDWARF	C6-oxidase, Brassinosteroid biosynthetic enzyme, Brassinosteroid biosynthesis, Organization and elongation of the leaf and stem cells, Regulation of root growth (Os03t0602300-01)	rapdb
	398	Os03g0610900	3	1.29409	0.028767	SAPK10	TO:0000131 - leaf water potential, TO:0000276 - drought tolerance, TO:0000303 - cold tolerance, TO:0000615 - abscisic acid sensitivity, TO:0000095 - osmotic response sensitivity, TO:0002665 - root hair length	Oryzabase
	399	Os03g0633800	3	3.72685	0.00315117	OsIAA12	leaf	FunRice
	400	Os03g0640800	3	-2.5451	0.00120548	OSHB4, OsHox32, HOX32, OsHB4, Oshox32, PHB3	Class III homeodomain Leu zipper (HD-Zip III) family member, Control of plant type architecture and leaf development (Os03t0640800-01);Similar to cDNA clone:J033124M18, full insert sequence. (Os03t0640800-02);Similar to cDNA clone:J033124M18, full insert sequence. (Os03t0640800-03)	rapdb
	401	Os03g0643300	3	-2.85164	0.000256174	OAT	TO:0000095 - osmotic response sensitivity, TO:0000622 - flower development trait, TO:0000180 - spikelet fertility, TO:0000474 - glume opening, TO:0000484 - seed shape, TO:0020033 - glume length, TO:0020034 - glume width, TO:0002673 - amino acid content, TO:0006002 - proline content	Oryzabase
	402	Os03g0646300	3	-3.08143	1.06e-08	CNGC6	TO:0000163 - auxin sensitivity, TO:0000315 - bacterial disease resistance, TO:0000173 - ethylene sensitivity, TO:0000167 - cytokinin sensitivity	Oryzabase
	403	Os03g0650000	3	1.63322	0.00114456	OsSh1	Panicle flower	OGRO databse
	404	Os03g0656500	3	-1.165	5.5e-08	OsCCX2	grain	FunRice
	405	Os03g0661300	3	3.20684	0.0297609	OsTUB8	leaf	FunRice
	406	Os03g0667300	3	2.77878	1.54e-09	IRT2	seed	Ricyer DB
	407	Os03g0667500	3	-1.00062	1.16e-05	OsIRT1	grain	FunRice
	408	Os03g0669000	3	-1.28808	0.0037008	TOGR1	TO:0000259 - heat tolerance, TO:0000207 - plant height	Oryzabase
	409	Os03g0669100	3	2.56092	0.0213402	RGB1	Seed	OGRO databse
	410	Os03g0676400	3	1.38995	5.96e-05	OsVQ13	grain	FunRice
	411	Os03g0680800	3	2.15209	0.00610301	OsBIHD1	leaf	FunRice
	412	Os03g0685000	3	1.56729	6.87e-09	OsFdC2, OsHDY1	Ferredoxin-like protein, Photosynthetic rate, Heading date, Chloroplast development (Os03t0685000-01)	rapdb
	413	Os03g0687000	3	2.65964	8.03e-06	PTR/NRT1	Yield	Fang et al. 2016
	414	Os03g0700700	3	2.09429	0.00159808	OsLOX1	flower	FunRice
	415	Os03g0701800	3	1.019	0.0392772	OsPIPK1	flower	FunRice
	416	Os03g0710800	3	-1.32349	0.0216616	GF14f	Grain Number, Grain Length, and Awn Development	Jin et al. 2016
	417	Os03g0711100	3	2.08704	5.06e-07	OsCOL10, OsBBX10, OsJ, OsCCT14	Member of the CONSTANS-like (COL) family, Flowering time repressor (Os03t0711100-01)	rapdb
	418	Os03g0712800	3	2.41704	0.0292389	OsGS1;3|OsGLN1;3	leaf	FunRice
	419	Os03g0722400	3	-1.00937	0.0154451	OsDDM1b	Dwarf	OGRO databse
	420	Os03g0723000	3	1.00184	0.0365892	OsGRAS19|OsSCL7	grain	FunRice
	421	Os03g0727600	3	-1.3677	0.00014	ACS1	TO:0000034 - chromium sensitivity, TO:0000481 - alkali sensitivity, TO:0000163 - auxin sensitivity, TO:0000227 - root length, TO:0001012 - lateral root length, TO:0000576 - stem length	Oryzabase
	422	Os03g0735000	3	2.48545	0.00590797	OsAGPL3, OsAPL1	Chloroplastic/amyloplastic ADP-glucose pyrophosphorylase large subunit, Starch synthesis in the leaf (Os03t0735000-01);Similar to Glucose-1-phosphate adenylyltransferase. (Os03t0735000-02)	rapdb
	423	Os03g0738600	3	1.89058	1.87e-05	OsLOX2 (L-2)	Seed	OGRO databse
	424	Os03g0751100	3	-1.8709	0.023949	OPT|OsOPT7	leaf	FunRice
	425	Os03g0752100	3	-2.1	0.0049	PHYC	Phytochrome C, Control of deetiolation and flowering, Photoperception of continuous far-red light (Os03t0752100-01)	rapdb
	426	Os03g0752800	3	1.27632	0.0401	OsMADS14	flower	FunRice
	427	Os03g0760800	3	1.13	3.27e-05	OsGASR1	leaf	FunRice
	428	Os03g0764900	3	-3.6407	0.00712879	OsDOF15, SP3	DOF transcription factor, Regulation of primary root elongation, Control of ethylene biosynthesis, Regulation of cell proliferation in root meristem, Salt stress response, Regulation of panicle architecture, Modulation of cytokinin homeostasis (Os03t0764900-01)	rapdb
	429	Os03g0769100	3	1.42387	7.16e-09	WGL2, RPS9	Chloroplast ribosomal protein S9, Early chloroplast development (Os03t0769100-01);Non-protein coding transcript. (Os03t0769100-02)	rapdb
	430	Os03g0773600	3	1.98013	0.00184156	NRRa	Flowering	OGRO databse
	431	Os03g0778100	3	1.38114	5.39e-09	OsPS1-F	growth and development of rice	Ramamoorthy et al. 2018
	432	Os03g0782500	3	-2.28	0.00157	OsPIL13|OsPIL1	flower	FunRice
	433	Os03g0786400	3	3.33594	0.00167436	DST	grain number	Li et al. 2013
	434	Os03g0790500	3	1.29661	2.77e-06	GID1, GID1L2	ga insensitive dwarf1, ga insensitive dwarf 1	rapdb
	435	Os03g0790600	3	1.46403	6.43e-05	PLA3|OsLBD3-7|OsLBD37	leaf	FunRice
	436	Os03g0793500	3	2.33	3.41e-05	EL1	architecture	Gao et al. 2009
	437	Os03g0809900	3	1.1994	0.000776	OsY14b	Panicle flower	OGRO databse
	438	Os03g0811100	3	-3.06	0.000128	OsChlD, ChlD, YGL98, Ygl7	Magnesium-chelatase subunit ChlD, Chlorophyll synthesis, Chloroplast development (Os03t0811100-01);Similar to Chloroplast Mg-chelatase subunit XANTHA-G. (Os03t0811100-02)	rapdb
	439	Os03g0815100	3	-5.06844	0.000352	OsNAC9	grain yield	Redillas et al. 2012
	440	Os03g0815700	3	-1.39796	3.23e-07	Spin1, SPIN1	K Homology domain containing protein, Nuclear RNA/DNA binding protein of the STAR (Signal Transduction and Activation of RNA) family, Flowering time control (Os03t0815700-01)	rapdb
	441	Os03g0819600	3	4.39108	0.0249297	gh1|OsCHI	panicle	FunRice
	442	Os03g0820400	3	-1.12508	0.0528175	ZFP15	flower	FunRice
	443	Os03g0822000	3	2.34192	0.0315	OsEXPA7	leaf	FunRice
	444	Os03g0825800	3	1.42839	0.0426242	RLCK120	TO:0000074 - blast disease, TO:0000653 - seed development trait, TO:0000175 - bacterial blight disease resistance, TO:0000621 - inflorescence development trait	Oryzabase
	445	Os03g0826600	3	-1.03517	3.21e-09	NPC1	TO:0000303 - cold tolerance, TO:0000061 - node shattering, TO:0000473 - grain shattering, TO:0002641 - acid detergent fiber, TO:0006001 - salt tolerance, TO:0000276 - drought tolerance	Oryzabase
	446	Os03g0831200	3	-1.15943	0.0527325	GATA12	TO:0000449 - grain yield per plant, TO:0002715 - chloroplast development trait, TO:0000249 - leaf senescence, TO:0000371 - yield trait, TO:0000084 - root number, TO:0000207 - plant height, TO:0000445 - seed number, TO:0000326 - leaf color, TO:0000241 - leaf number, TO:0000346 - tiller number, TO:0000128 - harvest index, TO:0000495 - chlorophyll content, TO:0000457 - total biomass yield, TO:000034…	Oryzabase
	447	Os03g0833300	3	1.62183	1.29e-05	SPL6	panicle	FunRice
	448	Os03g0837300	3	1.57981	0.0325615	OsNaPRT1, LTS1	Similar to Nicotinate phosphoribosyltransferase-like protein. (Os03t0837300-01);Nicotinate phosphoribosyltransferase, Leaf senescence (Os03t0837300-02)	rapdb
	449	Os03g0839900	3	-1.55843	0.00911088	RLCK122	TO:0000653 - seed development trait, TO:0000074 - blast disease, TO:0000621 - inflorescence development trait	Oryzabase
	450	Os03g0841800	3	4.51361	0.0011321	GL3.3	grain length	He et al. 2018
	451	Os03g0847500	3	-1.01637	4.91e-07	PTOX1	tiller	FunRice
	452	Os03g0856700	3	1.91063	0.0242215	OsGA20ox1|GNP1|SDSFL1	tiller	FunRice
	453	Os03g0857900	3	2.44033	0.026309	OsLOGL5	grain	FunRice
	454	Os02g0613600	4	2.56	0.00265	MBP	paniclenumber	Ricyer DB
	455	Os04g0106300	4	-1.82347	0.000122049	OsARG	panicle development,grain production	Ma et al. 2013
	456	Os04g0107600	4	3.46112	0.00176	ADCa|OsAdc2	leaf	FunRice
	457	Os04g0110100	4	-1.25	0.0243	BLEC-Str8	leaf	FunRice
	458	Os04g0166600	4	2.08779	0.00149199	OsSFL1	Homolog of yeast SAP30 (sin3-associated polypeptide 30), Regulation of flowering time, Mediation of periodic histone deacetylation (Os04t0166600-01)	rapdb
	459	Os04g0169100	4	2.77554	0.000169	ETR2	grain yield	Wang et al. 2009
	460	Os04g0178300	4	-2.48701	0.0355042	CPS4	TO:0000599 - enzyme activity, TO:0002671 - momilactone B content, TO:0002675 - gibberellic acid content, TO:0000160 - UV light sensitivity, TO:0002670 - momilactone A content, TO:0000439 - fungal disease resistance, TO:0000207 - plant height, TO:0000175 - bacterial blight disease resistance, TO:0000357 - growth and development trait, TO:0000074 - blast disease, TO:0000624 - allelopathic effect	Oryzabase
	461	Os04g0178400	4	-2.94463	0.00529512	CYP99A3	productivity	Ricyer DB
	462	Os04g0180400	4	1.15283	0.000302	CYP99A2	productivity	Ricyer DB
	463	Os04g0185600	4	-2.30032	4.75e-05	PT5	seed	Ricyer DB
	464	Os04g0249600	4	2.26589	0.0229	OsHAC1;2	grain	FunRice
	465	Os04g0271700	4	4.49	0.00785	OscZOG1	tiller	FunRice
	466	Os04g0282400	4	-1.54236	0.00616	OsFPFL4	Homologue of Arabidopsis flowering-promoting factor 1, AtFPF1, Modulation of root and flower development, Control of auxin accumulation, Modulation of ROS homeostasis (Os04t0282400-01)	rapdb
	467	Os04g0301500	4	-1.73	0.0304	RERJ1|OsOsbHLH006|OsbHLH6	leaf	FunRice
	468	Os04g0395800	4	1.17117	0.000255	TIFY9	TO:0000207 - plant height, TO:0000180 - spikelet fertility, TO:0002736 - flower number, TO:0000040 - panicle length, TO:0000137 - days to heading, TO:0002759 - grain number, TO:0000576 - stem length, TO:0000590 - grain weight, TO:0002757 - flag leaf length, TO:0000172 - jasmonic acid sensitivity	Oryzabase
	469	Os04g0396500	4	-1.01346	0.0305	LAX2	Tillers,panicle branching	Qin et al., 2008; Tabuchiet al., 2011
	470	Os04g0401700	4	-1.00193	6.98e-07	OsHAK1	leaf	FunRice
	471	Os04g0411400	4	3.89167	0.000105	RCN4	Reproductive organ - Heading date	Oryzabase
	472	Os04g0413500	4	1.30046	8.57e-08	GIF1	grain yield and adaptation	Yan et al. 2013
	473	Os04g0413900	4	-1.09525	4.59e-05	OsS40-6	A member of S40 gene family, Leaf senescence (Os04t0413900-01)	rapdb
	474	Os04g0415000	4	6.12191	0.00309966	ACL1	ABAXIALLY CURLED LEAF 1	rapdb
	475	Os04g0436100	4	4.09	1.01e-05	miR1432-OsACOT	grain filling rtae	Zhao et al. 2019
	476	Os04g0442300	4	6.01327	0.0133203	OsRR1	flower	FunRice
	477	Os04g0447100	4	-1.45469	7.94e-05	SPH	TO:0000576 - stem length, TO:0000592 - 1000-dehulled grain weight, TO:0000137 - days to heading, TO:0005001 - linoleic acid content, TO:0000180 - spikelet fertility, TO:0000731 - lignin content, TO:0000565 - spikelets per panicle length, TO:0005005 - alpha-linolenic acid content	Oryzabase
	478	Os04g0447800	4	4.03	2.8e-07	OsGAD2	grain	FunRice
	479	Os04g0448500	4	-3.331	1.43e-07	AP37	TO:0000432 - temperature response trait	Oryzabase
	480	Os04g0448900	4	-2.26285	0.0243558	ABA1	TO:0002667 - abscisic acid content, TO:0000522 - stomatal conductance, TO:0000131 - leaf water potential, TO:0000203 - bacterial leaf streak disease resistance, TO:0000478 - abscisic acid concentration, TO:0000326 - leaf color, TO:0000615 - abscisic acid sensitivity, TO:0000175 - bacterial blight disease resistance, TO:0000619 - vivipary, TO:0006001 - salt tolerance, TO:0000148 - viral disease re…	Oryzabase
	481	Os04g0457800	4	-1.08898	0.0275477	OsSERK1	seed	Ricyer DB
	482	Os04g0460600	4	-1.26021	1.55e-06	NAC2, OsNAC2, ONAC004, ONAC4, ONAC034, ONAC34, ONAC058, ONAC58, OMTN2, Ostil1, OsNAC2/ONAC004, OsORE1.2	Similar to H0219H12.10 protein. (Os04t0460600-01);NAC transcription factor, Regulation of shoot branching, plant height and flowering time (Os04t0460600-02)	rapdb
	483	Os04g0462500	4	1.22409	0.00999848	GF14B, GF14b, OsGF14b	Similar to 14-3-3-like protein GF14-6. (Os04t0462500-01);14-3-3 protein, Florigen receptor, Flowering (Os04t0462500-02);Similar to 14-3-3-like protein GF14-6. (Os04t0462500-03);Similar to 14-3-3-like protein GF14-6. (Os04t0462500-04);Similar to 14-3-3-like protein GF14-6. (Os04t0462500-05)	rapdb
	484	Os04g0463400	4	1.06384	0.0053731	OsVIT1	leaf	FunRice
	485	Os04g0463500	4	-1.51328	0.0260246	TDD1	TRYPTOPHAN DEFICIENT DWARF 1	rapdb
	486	Os04g0464200	4	1.32	3.5e-07	OsBADH1	Seed	OGRO databse
	487	Os04g0475600	4	1.43	0.000466	DAO	Seed	OGRO databse
	488	Os04g0481700	4	-5.38376	5.05e-09	MDR1	TO:0000163 - auxin sensitivity, TO:0000615 - abscisic acid sensitivity, TO:0006001 - salt tolerance, TO:0000276 - drought tolerance	Oryzabase
	489	Os04g0486950	4	1.1	0.00628	MS	TO:0000249 - leaf senescence, TO:0006001 - salt tolerance	Oryzabase
	490	Os04g0488400	4	1.26353	3.94e-05	FTL6	FLOWERING TIME LIKE GENE 6	rapdb
	491	Os04g0490500	4	-1.46672	1.29e-05	RLCK152	TO:0000621 - inflorescence development trait, TO:0000653 - seed development trait	Oryzabase
	492	Os04g0509300	4	-2.71467	0.0123797	SHO1|OsDCL4	leaf	FunRice
	493	Os04g0509600	4	-1.00823	8.92e-09	OsAMT1;1|OsAMT1.1	grain	FunRice
	494	Os04g0517100	4	1.01271	0.0328675	OsMyb4, MYB55	Similar to OSIGBa0145M07.4 protein. (Os04t0517100-01);SG2-type MYB transcription factor, Cold tolerance, Resistance to fungal and bacterial pathogens, Panicle development (Os04t0517100-02)	rapdb
	495	Os04g0518800	4	1.42381	7.91e-07	An-2	Awn Length and Grain Production	Gu et al. 2015
	496	Os04g0520700	4	1.81423	0.000252	OsS40-13	A member of S40 gene family, Leaf senescence, Response to pathogen infection (Os04t0520700-01)	rapdb
	497	Os04g0522500	4	-3.00419	7.02e-08	GA2OX6	TO:0002675 - gibberellic acid content, TO:0000207 - plant height	Oryzabase
	498	Os04g0524500	4	-1.4162	1.18e-06	OsYSL13	leaf	FunRice
	499	Os04g0531100	4	1.38542	1.45e-07	Rpp16|OsPBP1	grain	FunRice
	500	Os04g0535600	4	1.69752	0.0422	OsINV2	grain	FunRice
	501	Os04g0536300	4	1.285	0.00202	YAB5, OsYABBY5, OsYAB3, YAB3, Os YABBY5, TOB1	Transcription factor with zinc finger domain and helix-loop-helix domain (YABBY domain), Leaf development (Os04t0536300-01)	rapdb
	502	Os04g0542000	4	2.46892	0.00235735	OsS40-5	A member of S40 gene family, Leaf senescence (Os04t0542000-01)	rapdb
	503	Os04g0542200	4	-1.3235	3.02e-07	OsYSL9	grain-filling	FunRice
	504	Os04g0542800	4	1.08	0.0355	OsYSL16	leaf	FunRice
	505	Os04g0543000	4	1.41078	0.0167868	RLCK155	TO:0000653 - seed development trait, TO:0000621 - inflorescence development trait	Oryzabase
	506	Os04g0549700	4	3.5	2.97e-07	OsDREB4-2|CR250|OsAP2	leaf	FunRice
	507	Os04g0552300	4	7.10369	0.000390049	CYCU2;1	TO:0000544 - mesocotyl length, TO:0002677 - brassinosteroid sensitivity	Oryzabase
	508	Os04g0556300	4	-1.74106	0.0100525	GPX1	TO:0000445 - seed number, TO:0000456 - spikelet number, TO:0000207 - plant height, TO:0000429 - salt sensitivity, TO:0000656 - root development trait, TO:0000605 - hydrogen peroxide content	Oryzabase
	509	Os04g0556500	4	-1.1792	1.56e-06	cZOGT1	leaf	FunRice
	510	Os04g0556600	4	1.07275	0.0005584	cZOGT2	leaf	FunRice
	511	Os04g0563900	4	1.41226	0.0245164	RLCK157	TO:0000621 - inflorescence development trait, TO:0000276 - drought tolerance	Oryzabase
	512	Os04g0565400	4	-3.23092	2.94e-05	cZOGT3	leaf	FunRice
	513	Os04g0566500	4	-1.23789	0.00509957	OsAGO1b	Similar to Isoform 2 of Protein argonaute 1B. (Os04t0566500-01);Similar to Isoform 2 of Protein argonaute 1B. (Os04t0566500-02);Argonaute protein, Regulation of growth and organ development, Regulation of leaf abaxial sclerenchymatous cell differentiation (Os04t0566500-03);Argonaute protein, Regulation of growth and organ development, Regulation of leaf abaxial sclerenchymatous cell differentiati…	rapdb
	514	Os04g0569100	4	-1.75056	0.00784774	ROC4, Roc4	Similar to OCL1 homeobox protein. (Os04t0569100-01);Homeodomain-leucine zipper IV protein, GL2-type homeobox protein, Transcription factor, Promotion of flowering time preferentially under long days, Positive regulation of cuticular wax biosynthesis, Drought stress response (Os04t0569100-02)	rapdb
	515	Os04g0573900	4	-1.01808	1.91e-07	CYP704A3	TO:0000621 - inflorescence development trait, TO:0000734 - grain length, TO:0000146 - seed length, TO:0000391 - seed size	Oryzabase
	516	Os04g0574700	4	-1.08822	0.0171749	SLAC1	TO:0000276 - drought tolerance, TO:0000615 - abscisic acid sensitivity, TO:0000522 - stomatal conductance, TO:0000131 - leaf water potential	Oryzabase
	517	Os04g0578000	4	-1.25853	5.47e-05	OsACS2	leaf	FunRice
	518	Os04g0581400	4	-1.09304	3.56e-07	RAVL1	dwarf	Ricyer DB
	519	Os04g0583500	4	-4.77544	0.0268458	OsEXPA10	grain	FunRice
	520	Os04g0584100	4	4.29321	2.94e-09	RLCK158	TO:0000276 - drought tolerance, TO:0000621 - inflorescence development trait, TO:0006001 - salt tolerance	Oryzabase
	521	Os04g0584600	4	1.9	8.61e-08	OsCDPK7	flower	FunRice
	522	Os04g0597600	4	1.68579	0.000227	OsNPF7.4a, OsNPF7.4	Nitrate transporter, Regulation of tiller number and grain yield (Os04t0597600-01);Nitrate transporter, Regulation of tiller number and grain yield (Os04t0597600-02)	rapdb
	523	Os04g0600200	4	-1.36241	1.46e-06	AOX1a	seed	Ricyer DB
	524	Os04g0600500	4	1.04984	0.00584	OsBRXL3	panicle	FunRice
	525	Os04g0600900	4	5.22167	0.00193844	GRF3	TO:0000074 - blast disease, TO:0002616 - flowering time, TO:0000207 - plant height	Oryzabase
	526	Os04g0607500	4	-1.41213	0.0499624	OsHKT1;1|OsHKT4	leaf	FunRice
	527	Os04g0607600	4	-1.40204	0.0260857	HKT7, OsHKT7, OsHKT1;4	High-affinity K+ transporter (HKT) family protein, Na+ exclusion from leaf blade upon salt stress (Os04t0607600-01)	rapdb
	528	Os04g0610400	4	1.1	4.41e-06	OsAP2-39	Dwarf	OGRO databse
	529	Os04g0610800	4	1.97238	3.61e-05	RLIN1	RICE LESION INITIATION 1	rapdb
	530	Os04g0611800	4	-1.4903	7.77e-08	KS1	TO:0002675 - gibberellic acid content, TO:0000599 - enzyme activity, TO:0000357 - growth and development trait	Oryzabase
	531	Os04g0612000	4	3.89879	0.000104	KS2	TO:0000172 - jasmonic acid sensitivity, TO:0000207 - plant height, TO:0002675 - gibberellic acid content, TO:0000357 - growth and development trait, TO:0000599 - enzyme activity	Oryzabase
	532	Os04g0613000	4	3.46792	0.00164274	ZIP3	Vegetative organ - Leaf, Tolerance and resistance - Stress tolerance	Oryzabase
	533	Os04g0619400	4	1.36817	0.013486	RLCK160	TO:0000653 - seed development trait, TO:0000276 - drought tolerance, TO:0000303 - cold tolerance, TO:0000621 - inflorescence development trait	Oryzabase
	534	Os04g0620000	4	-1.811	0.0111281	OsABCC1|MRP1	grain	FunRice
	535	Os04g0620700	4	-2.95695	0.0337883	OsNUC1	flower	FunRice
	536	Os04g0631800	4	-1.16405	7.46e-07	RLCK162	TO:0000074 - blast disease, TO:0000653 - seed development trait, TO:0000621 - inflorescence development trait	Oryzabase
	537	Os04g0632100	4	-2.79553	4.35e-07	RLCK163	TO:0000621 - inflorescence development trait, TO:0000653 - seed development trait, TO:0000175 - bacterial blight disease resistance, TO:0000303 - cold tolerance	Oryzabase
	538	Os04g0634500	4	1.68305	8.96e-09	RLCK166	TO:0000653 - seed development trait, TO:0000175 - bacterial blight disease resistance, TO:0000074 - blast disease, TO:0000621 - inflorescence development trait	Oryzabase
	539	Os04g0640600	4	2.4	5.58e-08	OsSK3	panicle	FunRice
	540	Os04g0645100	4	4.76126	0.0002687	Flo2	grain size,starch quality	She et al. 2010
	541	Os04g0649100	4	1.96	7.24e-06	shat1	Panicle flower	OGRO databse
	542	Os04g0652400	4	-3.14538	0.0132867	OsSULTR3;3	grain	FunRice
	543	Os04g0654700	4	-2.91192	0.0066	OsCSN5A	COP9 signalosome complex subunit 5a, Interaction with RBSDV (rice black-streaked dwarf virus)-encoded P5-1, Promotion of RBSDV infection (Os04t0654700-01);Similar to COP9 signalosome complex subunit 5b (EC 3.4.-.-) (Signalosome subunit 5b) (Jun activation domain-binding homolog 1). (Os04t0654700-02)	rapdb
	544	Os04g0655300	4	-1.08559	1.2e-05	RLCK168	TO:0000653 - seed development trait, TO:0006001 - salt tolerance, TO:0000621 - inflorescence development trait	Oryzabase
	545	Os04g0656100	4	3.21744	0.0340614	AHA7, OSA7, OsA7, osAHA7, AHA7, PAA-Hwa	H+-ATPase, Blue light-induced stomatal opening of dumbbell-shaped guard cells, N uptake (Os04t0656100-01);Similar to OSIGBa0158D24.1 protein. (Os04t0656100-03);Similar to OSIGBa0158D24.1 protein. (Os04t0656100-04)	rapdb
	546	Os04g0656500	4	1.49769	0.0123168	OsLG1	leaf	FunRice
	547	Os04g0658300	4	1.18938	0.0129041	OsrcaA2	Dwarf	OGRO databse
	548	Os04g0660100	4	1.96118	0.0136461	OsIBH1|IBH1	leaf	FunRice
	549	Os04g0661200	4	0.96503	0.0181466	IPK1	seed	Ricyer DB
	550	Os04g0661600	4	-2.55	2.49e-05	CNX1	TO:0000370 - leaf width, TO:0002661 - seed maturation, TO:0000253 - seed dormancy, TO:0000492 - leaf shape	Oryzabase
	551	Os04g0665600	4	2.17	8.9e-05	RLI1	HTH_MYB-like transcription factor, Positive regulation of leaf inclination (Os04t0665600-01)	rapdb
	552	Os04g0668900	4	1.01718	0.038725	IM1	TO:0000069 - variegated leaf, TO:0000207 - plant height, TO:0006001 - salt tolerance, TO:0002639 - shoot branching, TO:0000329 - tillering ability, TO:0000615 - abscisic acid sensitivity, TO:0002667 - abscisic acid content, TO:0000478 - abscisic acid concentration, TO:0002672 - auxin content	Oryzabase
	553	Os04g0670500	4	3.80474	5.93e-09	CP1	TO:0000481 - alkali sensitivity	Oryzabase
	554	Os04g0674700	4	1.20449	8.14e-08	OsBIABP1|SLAC1|OsSLAC1	flower	FunRice
	555	Os04g0678700	4	2.78061	1.68e-07	OsPORA	leaf	FunRice
	556	Os04g0684200	4	-2.14611	0.0317772	RLCK173	TO:0000175 - bacterial blight disease resistance, TO:0002677 - brassinosteroid sensitivity, TO:0000074 - blast disease, TO:0000621 - inflorescence development trait	Oryzabase
	557	Os04g0684500	4	1.90332	0.00498272	WSL5	Pentatricopeptide repeat protein, Chloroplast development under cold stress (Os04t0684500-01);Hypothetical conserved gene. (Os04t0684500-02)	rapdb
	558	Os04g0685900	4	2.18742	0.0256235	RLCK174	TO:0000074 - blast disease, TO:0000653 - seed development trait, TO:0000621 - inflorescence development trait	Oryzabase
	559	Os04g0692600	4	1.6869	0.0254861	SGRL	Panicle flower	OGRO databse
	560	Os01g0848200	5	2.18119	2.88e-07	P5CS	seed	Ricyer DB
	561	Os05g0111300	5	1.42572	1.69e-05	OsMT2b	panicle	FunRice
	562	Os05g0116100	5	1.63847	0.0363173	DHAR1	TO:0002677 - brassinosteroid sensitivity, TO:0000276 - drought tolerance, TO:0002657 - oxidative stress, TO:0000396 - grain yield	Oryzabase
	563	Os05g0119000	5	2.06	1.04e-05	STAR2	productivity	Ricyer DB
	564	Os05g0125000	5	-3.55129	0.0466	OsSIZ1	flower	FunRice
	565	Os05g0128200	5	-1.12886	0.0256327	OsTZF5	grain	FunRice
	566	Os05g0129000	5	2.09211	0.000737318	OsECS	grain	FunRice
	567	Os05g0129700	5	3.67183	0.0174843	OSH71|Oskn2	flower	FunRice
	568	Os05g0133100	5	1.76	2.47e-07	OsGlnB	leaf	FunRice
	569	Os05g0135700	5	-3.00631	0.0372112	OsSAMS1	flower	FunRice
	570	Os05g0139100	5	-1.06989	3.94e-05	APG	Typical DNA-binding bHLH protein, Negative regulation of grain length and weight (Os05t0139100-01)	rapdb
	571	Os05g0140500	5	5.1135	0.0379	OsY14a	Dwarf	OGRO databse
	572	Os05g0150500	5	-1.4351	0.00404724	TIR1, OsTIR1	F-Box auxin receptor protein, Nuclear protein, Flag leaf inclination, Primary root growth, Crown root initiation, Seed development, Tillering (Os05t0150500-01)	rapdb
	573	Os05g0156900	5	1.95355	0.00121	chalk5	Seed	OGRO databse
	574	Os05g0159300	5	2.23933	0.0215322	GELP62	TO:0000207 - plant height, TO:0000051 - stem strength	Oryzabase
	575	Os05g0187500	5	1.27451	0.0134	GSE5	grain size and yield	Li et al. 2011
	576	Os05g0187800	5	-1.36829	0.00712978	DER1	TO:0000100 - shrunken endosperm, TO:0000104 - floury endosperm	Oryzabase
	577	Os05g0196500	5	-1.11128	0.030611	JMJ703	H3K4-specific demethylase, JmjC domain-containing protein, Control of stem elongation, Control of transposon activity, Panicle development (Os05t0196500-01)	rapdb
	578	Os05g0198400	5	1.37606	0.0104242	OsZIP7a|OsZIP7	grain	FunRice
	579	Os05g0203800	5	-3.58368	0.026991	OSMADS58	flower	FunRice
	580	Os05g0204600	5	-3.46321	8.29e-11	OsBBX14, OsDBB3b	B-box zinc finger protein, Repressor of flowering under long and short-day conditions (Os05t0204600-01)	rapdb
	581	Os05g0211100	5	1.3059	0.00351	OsCYP51G3	leaf	FunRice
	582	Os05g0212900	5	4.28852	2.86e-06	CHS	seed	Ricyer DB
	583	Os05g0235300	5	1.01045	0.00102	TOR	seed	Ricyer DB
	584	Os05g0245300	5	-1.13183	1.47e-07	OsBLE3	Dwarf	OGRO databse
	585	Os05g0298700	5	-1.0717	0.0167	XYH	panicle	FunRice
	586	Os05g0311801	5	1.33147	0.00827	IPT3	TO:0000011 - nitrogen sensitivity, TO:0000456 - spikelet number	Oryzabase
	587	Os05g0322900	5	4.21	3.55e-05	WRKY45	TO:0000397 - grain size, TO:0000175 - bacterial blight disease resistance, TO:0000454 - stem borer resistance, TO:0000074 - blast disease, TO:0000615 - abscisic acid sensitivity, TO:0006001 - salt tolerance, TO:0000303 - cold tolerance, TO:0000401 - plant growth hormone sensitivity, TO:0000429 - salt sensitivity, TO:0000112 - disease resistance	Oryzabase
	588	Os05g0323800	5	-3.94645	0.0495334	OsAGSW1	grain size	Li et al. 2015
	589	Os05g0349700	5	-1.33	5.08e-05	YGL1, YGL1, ygl1, CHLG, Ygl1, CS	Chl synthase, Chl biosynthesis (Os05t0349700-01);Similar to Chlorophyll synthase. (Os05t0349700-02);Similar to Chlorophyll synthase. (Os05t0349700-03)	rapdb
	590	Os05g0365300	5	2.40463	0.0285593	DEPG1	leaf	FunRice
	591	Os05g0370600	5	2.83184	0.0123734	FTIP7	TO:0000180 - spikelet fertility, TO:0000437 - male sterility	Oryzabase
	592	Os05g0373300	5	2.28966	0.0300602	BON3	TO:0000207 - plant height, TO:0000175 - bacterial blight disease resistance, TO:0000074 - blast disease, TO:0000346 - tiller number	Oryzabase
	593	Os05g0381400	5	2.5369	7.33e-06	OsPM19L1|OsPM1	leaf	FunRice
	594	Os05g0386800	5	1.17344	0.0063706	OsBC1L4	tiller	FunRice
	595	Os05g0387700	5	2.40459	0.00727348	RLCK186	TO:0000621 - inflorescence development trait, TO:0000653 - seed development trait, TO:0000175 - bacterial blight disease resistance, TO:0000074 - blast disease	Oryzabase
	596	Os05g0389000	5	3.22077	0.0277662	ERF142, OsERF#142, OsERF142, AP2/EREBP#049, AP2/EREBP49, SMOS1, OsSMOS1, SHB, OsAP2-EREBP-049	Similar to AP2-1 protein (Fragment). (Os05t0389000-01);AP2/ERF transcription factor, Regulation of cell elongation and proliferation in root meristem, Organ size control (Os05t0389000-02)	rapdb
	597	Os05g0395300	5	2.67249	0.0474846	DPS1, OsCBSDUF1	Cystathionine beta-synthase, core domain containing protein. (Os05t0395300-01);Cystathionine &beta;-synthase (CBS) domain containing protein, "Regulation of ROS homeostasis, anther cuticle formation and panicle development" (Os05t0395300-02)	rapdb
	598	Os05g0405000	5	-2.684	0.00213	OsPPDKB, cyOsPPDKB, cyOsPPDK, FLO4-4, FLO4	Chloroplastic pyruvate orthophosphate dikinase (PPDK,EC 2.7.9.1), Starch metabolism and structure (Os05t0405000-01);Cytosolic pyruvate orthophosphate dikinase (PPDK,EC 2.7.9.1), Starch metabolism and structure, Modulation of carbon flow for starch and lipid biosynthesis during grain filling (Os05t0405000-02)	rapdb
	599	Os05g0408200	5	-3.44561	0.038794	OsSPL9	grain	FunRice
	600	Os05g0423400	5	-5.18973	0.00974654	OsMADS4	flower	FunRice
	601	Os05g0429900	5	1.19645	0.0399388	Osmyb1	flower	FunRice
	602	Os05g0438600	5	1.84885	9.8e-08	OscFBP2	Fructose-1,6-bisphosphatase class 1/Sedoheputulose-1,7-bisphosphatase domain containing protein. (Os05t0438600-01);Fructose-1,6-bisphosphatase, Cytosolic sucrose synthesis, Tiller growth (Os05t0438600-02)	rapdb
	603	Os05g0442400	5	4.59003	6.72e-08	MID1|OsARM1	leaf	FunRice
	604	Os05g0443500	5	1.6	0.000353	Fd	leaf	FunRice
	605	Os05g0454200	5	5.21598	0.00085389	BGL, OsRopGEF10, bgl	Guanine nucleotide exchange factors for Rop, Activation of small cuticular papillae development on leaf epidermis (Os05t0454200-01)	rapdb
	606	Os05g0455200	5	1.13	0.000764	SH5	TO:0000473 - grain shattering, TO:0000733 - lignin biosynthesis trait, TO:0000396 - grain yield, TO:0000373 - inflorescence anatomy and morphology trait, TO:0000547 - primary branch number, TO:0000142 - secondary branching of inflorescence, TO:0006014 - phyllotaxy, TO:0006020 - shoot apical meristem development	Oryzabase
	607	Os05g0458600	5	-2.06187	3.3e-10	OsLAC	grain	FunRice
	608	Os05g0469600	5	1.98217	0.00402	PDC1	TO:0000621 - inflorescence development trait	Oryzabase
	609	Os05g0477600	5	1.64001	2.34e-05	OsEXP4	Dwarf	OGRO databse
	610	Os05g0481000	5	1.52693	0.015027	OsSNAT1	grain	FunRice
	611	Os05g0482400	5	-1.12337	1.34e-05	EUI1, eui1, GA16,17ox, CYP714D1, EUI, CYP714D1/EUI	Cytochrome P450 monooxygenase, Gibberellin (GA)-deactivating enzyme, Modulation of internode elongation (Os05t0482400-01)	rapdb
	612	Os05g0494100	5	1.8779	0.00547402	DRAP2, OsDrAp2, OsHAPL1	Histone-like transcription factor, Transcriptional repressor, Repressor of heading date, Inhibition of flowering under long-day condition (Os05t0494100-01)	rapdb
	613	Os05g0498300	5	2.26186	0.0127263	OsMSH5	panicle	FunRice
	614	Os05g0498900	5	-1.39332	0.0171498	RLCK189	TO:0000621 - inflorescence development trait	Oryzabase
	615	Os05g0514600	5	2.83274	9.95e-05	SBI	TO:0000068 - lodging incidence, TO:0000145 - internode length, TO:0000207 - plant height	Oryzabase
	616	Os05g0518800	5	2.39392	0.00096	OsS40-2	A member of S40 gene family, Leaf senescence, "Regulation of crosstalk among abiotic, biotic and developmental senescence" (Os05t0518800-01)	rapdb
	617	Os05g0519700	5	-1.41561	0.00811063	HSP101|OsClpB-cyt|HSP100	flower	FunRice
	618	Os05g0530500	5	1.04871	0.0320964	OSK1	dwarf,seed	Ricyer DB
	619	Os05g0531000	5	1.45668	1.25e-05	OsS40-14	A member of S40 gene family, Leaf senescence, "Regulation of crosstalk among abiotic, biotic and developmental senescence" (Os05t0531000-01)	rapdb
	620	Os05g0531100	5	-1.21038	0.0225417	OsS40-1	A member of S40 gene family, Leaf senescence, "Regulation of crosstalk among abiotic, biotic and developmental senescence" (Os05t0531100-01)	rapdb
	621	Os05g0542500	5	-1.51	0.00471	OsLEA3|OsLEA3-1	grain	FunRice
	622	Os05g0551700	5	-4.34483	8.1e-09	IPT7	TO:0000163 - auxin sensitivity, TO:0000011 - nitrogen sensitivity, TO:0000456 - spikelet number	Oryzabase
	623	Os05g0554000	5	2.5291	0.000184	OsMATE2	grain	FunRice
	624	Os05g0554400	5	-1.21517	2.93e-06	ES5, SUI2	Phosphatidylserine synthase, Control of leaf senescence (Os05t0554400-01);Similar to Phosphatidylserine synthase 2. (Os05t0554400-02)	rapdb
	625	Os05g0555600	5	1.48977	5.62e-07	OsNADH-GOGAT2	leaf	FunRice
	626	Os05g0556800	5	1.52303	0.022627	PUP7	TO:0000567 - tiller angle, TO:0000135 - leaf length, TO:0002759 - grain number, TO:0000397 - grain size	Oryzabase
	627	Os05g0557700	5	-1.63184	2.01e-08	LTN1, PHO2.2	Ubiquitin-conjugating E2 enzyme, Phosphate homeostasis, Negative regulator of the inorganic phosphate (Pi)-starvation response-signaling pathway (Os05t0557700-01);Pi starvation-induced isoform, Regulation of Pi homeostasis (Os05t0557700-02)	rapdb
	628	Os05g0563000	5	4.34737	0.00222325	NAC62	Vegetative organ - Leaf, Other	Oryzabase
	629	Os05g0566400	5	1.12	2.14e-06	OsMPK7|OsMAPK20-5	leaf	FunRice
	630	Os05g0567300	5	1.34825	0.0415377	WSL6	Similar to GTP-binding protein era. (Os05t0567300-01);Era-type GTP-binding protein, Chloroplast development (Os05t0567300-02)	rapdb
	631	Os05g0595300	5	-1.19024	1.8e-06	NRR|CRCT	tiller	FunRice
	632	Os05g0597100	5	-2.44	0.00115	OsHDT1|HDT701	flower	FunRice
	633	Os06g0101600	5	4.4864	0.0174	PC	grainlength	Ricyer DB
	634	Os06g0324400	5	1.89743	0.0127869	LEA3	seed	Ricyer DB
	635	Os06g0103600	6	1.65708	0.00410804	RA1	TO:0002715 - chloroplast development trait, TO:0000495 - chlorophyll content, TO:0000496 - carotenoid content, TO:0000326 - leaf color	Oryzabase
	636	Os06g0107700	6	1.27	0.00545	OsLFNR2, LFNR2, FNR	Leaf-type ferredoxin-NADP+-oxidoreductase, Regulation of electron partitioning in the chloroplast (Os06t0107700-01)	rapdb
	637	Os06g0115300	6	-1.48383	8.51e-10	OsACBP2	grain	FunRice
	638	Os06g0116200	6	1.4903	0.00502175	GRF5	TO:0000620 - embryo development trait, TO:0000207 - plant height, TO:0002616 - flowering time, TO:0000074 - blast disease, TO:0000653 - seed development trait	Oryzabase
	639	Os06g0116400	6	-1.68	0.000245	ZN	leaf	FunRice
	640	Os06g0126000	6	1.53984	0.0314804	SEU3	TO:0000621 - inflorescence development trait	Oryzabase
	641	Os06g0127100	6	-1.66529	0.022	CBF1	productivity	Ricyer DB
	642	Os06g0127800	6	3.22886	0.041784	DLT/OsGRAS32	tiller,plant height	Tong et al., 2009
	643	Os06g0128300	6	-1.1	0.0049	OsATM3	leaf	FunRice
	644	Os06g0130100	6	2.7244	0.00135471	OsSIK1|OsERL	leaf	FunRice
	645	Os06g0130400	6	-1.30784	7.86e-09	SSG6	TO:0000397 - grain size, TO:0002715 - chloroplast development trait, TO:0000266 - chalky endosperm, TO:0002658 - starch grain synthesis, TO:0000402 - grain width, TO:0002655 - starch grain size, TO:0000590 - grain weight	Oryzabase
	646	Os06g0131300	6	1.80598	0.0092577	ADC1	productivity	Ricyer DB
	647	Os06g0132400	6	1.15246	9.89e-08	YGL18	YELLOW-GREEN LEAF 18	rapdb
	648	Os06g0133000	6	-1.99266	0.0175248	Wx	grain	FunRice
	649	Os06g0136900	6	2.08444	0.00449462	DP1	flower	FunRice
	650	Os06g0142350	6	6.5477	0.00576976	OsENOD93-1	Dwarf	OGRO databse
	651	Os06g0154200	6	1.87581	3.11e-07	D3	tillers	Yan et al., 2007; Yasunoet al., 2007
	652	Os06g0160700	6	1.56668	0.0444582	SSI	grainlength,grainweight,seed	Ricyer DB
	653	Os06g0163000	6	1.32429	0.0451519	RLCK197	TO:0000621 - inflorescence development trait, TO:0000653 - seed development trait, TO:0000175 - bacterial blight disease resistance, TO:0000303 - cold tolerance	Oryzabase
	654	Os06g0182300	6	2.67452	0.0210306	GSL5	TO:0000303 - cold tolerance	Oryzabase
	655	Os06g0182500	6	3.86911	0.00332024	OsDA1	grain size	FunRice
	656	Os06g0194900	6	1.92796	0.00419397	RSUS2	TO:0000592 - 1000-dehulled grain weight, TO:0000696 - starch content, TO:0000590 - grain weight, TO:0000396 - grain yield, TO:0000286 - submergence sensitivity, TO:0000432 - temperature response trait	Oryzabase
	657	Os06g0202900	6	1.49753	0.0332678	RLCK203	TO:0000303 - cold tolerance, TO:0000653 - seed development trait, TO:0000621 - inflorescence development trait	Oryzabase
	658	Os06g0203800	6	1.9707	0.00701555	OsER1	panicle	FunRice
	659	Os06g0205100	6	-2.63447	7.02e-06	OsC1, C	Similar to Transcriptional activator. (Os06t0205100-01);R2R3-Myb factor, Homolog of maize C1, Determinant of anthocyanin biosynthesis in rice leaves, Apiculus and leaf sheath colour (Os06t0205100-02)	rapdb
	660	Os06g0211200	6	-1.89315	2.68e-08	OsAREB8|OsAREB1|OsbZIP46|OsABF2|ABL1	flower	FunRice
	661	Os06g0217300	6	4.76	1.62e-07	MADS55	TO:0000621 - inflorescence development trait	Oryzabase
	662	Os06g0226500	6	3.23132	1.4e-05	BU1, ILI4, OsBU1	Helix-loop-helix protein, Brassinosteroid signaling (Os06t0226500-01)	rapdb
	663	Os06g0229800	6	2.08354	3.82e-05	ALK|SSIIa	grain	FunRice
	664	Os06g0232300	6	3.36897	0.00437498	OsPIN1a	panicle	FunRice
	665	Os06g0247500	6	4.39346	0.00722933	OsPFPB, PFPB, OsPFP-B, PFP-B	Pyrophosphate-fructose 6-phosphate 1-phosphotransferase (PFP) beta subunit, Regulation of carbon metabolism during grain filling (Os06t0247500-01);Similar to pyrophosphate--fructose 6-phosphate 1-phosphotransferase beta subunit. (Os06t0247500-02)	rapdb
	666	Os06g0250600	6	-2.61025	0.00877543	OsGORK|OsK5.2	leaf	FunRice
	667	Os06g0264200	6	2.37272	9.46e-06	OsCOL16	flowering time	FunRice
	668	Os06g0265000	6	1.10164	0.000102	OsAS2	leaf	FunRice
	669	Os06g0270900	6	-1.48231	0.0179824	OsALDH2b|OsALDH2B1|ALDH2b	grain	FunRice
	670	Os06g0275000	6	-2.66988	1.39e-06	Hd1	grain width and weight;panicle branching	Liu et al. 2017;Endo-Higashi and Izawa, 2011
	671	Os06g0275500	6	5.34908	0.0363768	CLF, OsSET24, SDG711, EZ1, OsCLF	H3K27 methyltransferase, Polycomb repressive complex2 (PRC2) key subunit, Enhancer of zeste [E(z)] genes, Long day repression of flowering (Os06t0275500-01)	rapdb
	672	Os06g0330100	6	-4.49699	3.52e-06	Pi25|Pid3	leaf	FunRice
	673	Os06g0354700	6	1.83	1.7e-07	NYC3	leaf	FunRice
	674	Os06g0498800	6	2.05291	1.34e-07	OsMFT1	spikelets per panicle and delays heading date	Song et al. 2018
	675	Os06g0552900	6	1.24684	0.0126695	FTL12	FLOWERING TIME LIKE GENE 12	rapdb
	676	Os06g0569500	6	-2.23704	4.51e-08	d35	Dwarf	OGRO databse
	677	Os06g0572400	6	2.83476	0.0122667	TET9	TO:0006001 - salt tolerance, TO:0000249 - leaf senescence	Oryzabase
	678	Os06g0573600	6	2.44973	0.0170693	OsBGal2	flower	FunRice
	679	Os06g0579200	6	2.46061	4.62e-06	OsLCT1	seed	Ricyer DB
	680	Os06g0594600	6	-1.27278	4.6e-07	OsAt10	leaf	FunRice
	681	Os06g0595900	6	2.00042	0.04035	LC3	SPOC domain-containing protein, Regulator of leaf inclination (Os06t0595900-01)	rapdb
	682	Os06g0598800	6	1.21701	0.00159	WSL1	WAX CRYSTAL-SPARSE LEAF 1	rapdb
	683	Os06g0600400	6	-1.0942	4.19e-07	CYP734A4	Cytochrome P450 monooxygenase, Regulation of panicle exsertion and uppermost internode (Os06t0600400-01)	rapdb
	684	Os06g0602700	6	-1.27384	0.000564	BT1-3, OsBT1-3	Plastid adenine nucleotide uniporter, Chloroplast development at early leaf stage (Os06t0602700-01)	rapdb
	685	Os06g0604000	6	1.79	2.62e-07	ERF1	TO:0000172 - jasmonic acid sensitivity, TO:0000709 - leaf gloss, TO:0000276 - drought tolerance	Oryzabase
	686	Os06g0607700	6	2.05114	0.0149553	ABCG15	TO:0000187 - anther color, TO:0000215 - stamen anatomy and morphology trait, TO:0000531 - anther length, TO:0000437 - male sterility, TO:0000245 - pollen free	Oryzabase
	687	Os06g0608700	6	1.53	0.00818	OsAld-Y, YGDL-1, YGDL1	Similar to Fructose-bisphosphate aldolase, cytoplasmic isozyme (EC 4.1.2.13). (Os06t0608700-01);Similar to Fructose-bisphosphate aldolase, cytoplasmic isozyme (EC 4.1.2.13). (Os06t0608700-02);Fructose-1,6-bisphosphate aldolase (EC:4.1.2.13), Chlorophyll biosynthesis, Chloroplast development, Sugar metabolism (Os06t0608700-03)	rapdb
	688	Os06g0614000	6	1.55417	0.00534571	OsFTIP1	A member of the family of multiple C2 domain and transmembrane region proteins (MCTPs), Mediation of flowering time, Regulation of florigen transport (Os06t0614000-01)	rapdb
	689	Os06g0622700	6	-3.26388	0.014	OsbZIP50|OsbZIP74	leaf	FunRice
	690	Os06g0637500	6	1.84471	0.00139338	OsMYB102	MYB transcription factor, Regulation of leaf senescence (Os06t0637500-02)	rapdb
	691	Os06g0644200	6	-2.91746	0.00953538	AVP1	grain yield	Kim et al. 2014
	692	Os06g0649600	6	1.09	2.63e-05	SDT	tiller	FunRice
	693	Os06g0653000	6	1.30627	0.00303	OsGL1-3	leaf	FunRice
	694	Os06g0657500	6	-2.6247	0.0543243	HL6	Hypothetical conserved gene. (Os06t0657500-01);AP2/ERF transcription factor (Os06t0657500-02);AP2/ERF transcription factor, Regulation of trichome formation (Os06t0657500-03)	rapdb
	695	Os06g0658900	6	-1.52319	0.00711007	OsSGD1, OsVTE2, SGD1	Homogentisate phytyltransferase (HPT), Tocopherol (vitamin E) biosynthesis, Plant development, Cold tolerance (Os06t0658900-01)	rapdb
	696	Os06g0662200	6	2.99978	0.0339756	OsbZIP52|RISBZ5	panicle	FunRice
	697	Os06g0663900	6	3.06	9.13e-07	RLCK212	TO:0000276 - drought tolerance, TO:0000621 - inflorescence development trait, TO:0000653 - seed development trait, TO:0000074 - blast disease, TO:0000175 - bacterial blight disease resistance	Oryzabase
	698	Os06g0666100	6	-1.33991	1.75e-07	SG6, GL6	Plant-specific PLATZ (plant AT-rich sequence- and zinc-binding) transcription factor, Regulation of grain length and number, Control of plant height, Regulation of spikelet hull cell division (Os06t0666100-01)	rapdb
	699	Os06g0667100	6	-1.00401	5.32e-08	HAP5B	TO:0000137 - days to heading, TO:0000276 - drought tolerance, TO:0000615 - abscisic acid sensitivity, TO:0002616 - flowering time, TO:0006001 - salt tolerance	Oryzabase
	700	Os06g0670300	6	1.03699	0.000983	OsMPH1, OsMYB45	MYB-like transcription factor, Regulation of plant height, Tolerance to cadmium stress (Os06t0670300-01)	rapdb
	701	Os06g0676000	6	-1.05905	4.89e-07	OsNRAMP3	leaf	FunRice
	702	Os06g0677000	6	4.39995	0.0416561	DEP3, OspPLAIII&delta;	Patatin-related phospholipase A, Regulation of panicle length, grain shape and grain number per panicle (Os06t0677000-01)	rapdb
	703	Os06g0685700	6	2.0656	0.00104	ARF10	TO:0000163 - auxin sensitivity, TO:0000181 - seed weight, TO:0000149 - seed width, TO:0000653 - seed development trait, TO:0000622 - flower development trait, TO:0002655 - starch grain size, TO:0000696 - starch content, TO:0000135 - leaf length, TO:0000346 - tiller number, TO:0000655 - leaf development trait, TO:0000391 - seed size, TO:0000207 - plant height, TO:0000079 - lemma and palea anatomy …	Oryzabase
	704	Os06g0690200	6	-1.83642	0.0243427	RLCK215	TO:0000621 - inflorescence development trait, TO:0000074 - blast disease	Oryzabase
	705	Os06g0693200	6	2.35739	0.0483869	OsRRK1	leaf	FunRice
	706	Os06g0699400	6	-2.54	0.00215	OsMAPK4|OsMSRMK3	panicle	FunRice
	707	Os06g0700700	6	2.55393	0.00897062	OsHMA2|OsHMA2v	grain	FunRice
	708	Os06g0703500	6	1.04994	0.0173267	SPL12	TO:0000063 - mimic response, TO:0000207 - plant height	Oryzabase
	709	Os06g0706400	6	-1.24446	1.58e-07	PTR/NRT1	Yield	Fang et al. 2016
	710	Os06g0712700	6	-1.79645	1.61e-10	OsMADS16|SPW1	flower	FunRice
	711	Os06g0714900	6	4.14957	0.0125716	RLCK218	TO:0000621 - inflorescence development trait, TO:0006001 - salt tolerance, TO:0000276 - drought tolerance, TO:0000175 - bacterial blight disease resistance	Oryzabase
	712	Os06g0717200	6	-1.02645	4.59e-07	FON1	TO:0000346 - tiller number, TO:0000052 - primary branching of inflorescence, TO:0000223 - pistil anatomy and morphology trait, TO:0000499 - flower anatomy and morphology trait, TO:0000225 - stamen number, TO:0000249 - leaf senescence, TO:0000145 - internode length, TO:0000079 - lemma and palea anatomy and morphology trait, TO:0000184 - seed anatomy and morphology trait, TO:0000621 - inflorescence…	Oryzabase
	713	Os06g0720900	6	-1.51518	0.00207	BZIP55, OsbZIP55, OsFD2	Basic leucine zipper (bZIP)-containing transcription factor, Leaf development (Os06t0720900-01)	rapdb
	714	Os06g0724900	6	2.43996	0.0268418	ILA1, ILA1, ila1	Raf-Like MAPKKK, Mechanical tissue formation at the leaf lamina joint (Os06t0724900-01)	rapdb
	715	Os06g0726200	6	4.81	8.32e-05	RC24	leaf	FunRice
	716	Os06g0726400	6	1.36	8.19e-08	RBE1	seed	Ricyer DB
	717	Os06g0728700	6	-2.47529	3.52e-08	EPR1	TO:0000432 - temperature response trait, TO:0000437 - male sterility, TO:0002693 - gravity response trait	Oryzabase
	718	Os06g0729000	6	-1.07	0.000101	PSY1	leaf	FunRice
	719	Os06g0731200	6	-1.47894	0.000733	ABCG16	Biochemical character, Reproductive organ - Spikelet, flower, glume, awn	Oryzabase
	720	Os07g0551400	6	1.59151	1.82e-06	USP	seed	Ricyer DB
	721	Os12g0271700	6	-1.33	0.00458	SPS3	seed	Ricyer DB
	722	Os01g0176900	7	-4.06428	0.0189064	BZR1	dwarf	Ricyer DB
	723	Os01g0582600	7	-1.01838	6.56e-06	A2	grainshape,grainlength,paniclenumber,seed	Ricyer DB
	724	Os03g0700800	7	3.47764	0.00024184	EIN2	grainlength,grainweight	Ricyer DB
	725	Os05g0472700	7	1.38	0.000209	OsZIP8	seed	Ricyer DB
	726	Os07g0100800	7	1.19456	0.0503665	OsProT3	leaf	FunRice
	727	Os07g0102300	7	2.93669	0.0104	SRL1, CLD1	Glycophosphatidylinositol (GPI)-anchored membrane protein, Regulation of leaf rolling, Maintenance of cell wall formation, epidermal integrity and water homeostasis (Os07t0102300-01)	rapdb
	728	Os07g0103500	7	3.1271	2.01e-06	OsGA2ox5	panicle	FunRice
	729	Os07g0106200	7	-1.18552	0.0435622	OsMST3	leaf	FunRice
	730	Os07g0108900	7	-1.4033	0.0474883	OsMADS15|DEP	tiller	FunRice
	731	Os07g0129200	7	3.36251	5.84e-10	OsPR1a|OsSCP	leaf	FunRice
	732	Os07g0129700	7	2.34091	0.049874	D6|OSH15|Oskn3	flower	FunRice
	733	Os07g0134800	7	-1.03612	0.00620867	SDH1	productivity	Ricyer DB
	734	Os07g0138200	7	-1.28	0.0243	ONAC096	NAC transcription factor, ABA-induced leaf senescence and tillering (Os07t0138200-01)	rapdb
	735	Os07g0151100	7	2.11584	0.000827756	MIL1, mil1	CC-type glutaredoxin, Panicle development (Os07t0151100-01);Plant-specific CC-type glutaredoxin, Control of meiosis entry in microsporocytes (Os07t0151100-02)	rapdb
	736	Os07g0153000	7	-1.30075	0.0481	TIFY5	Tolerance and resistance - Stress tolerance, Reproductive organ - Spikelet, flower, glume, awn	Oryzabase
	737	Os07g0153600	7	1.06385	0.0180803	PROG1	plant architecture	Wu et al. 2018
	738	Os07g0154100	7	-1.2	0.0108	OsNCED4	leaf	FunRice
	739	Os07g0155600	7	-1.11508	1.01e-08	MHZ7/OsEIN2	Seed	OGRO databse
	740	Os07g0160100	7	3.16809	0.0325472	OsYABBY1|OsYAB1	flower	FunRice
	741	Os07g0164000	7	-1.01879	5e-08	WAF1, waf1, waf1-1, waf1-2, HEN1	Small RNA methyltransferase, Small RNA stabilization, Regulation of shoot development (Os07t0164000-01)	rapdb
	742	Os07g0176600	7	2.08865	7.66e-06	OsNek3	grain	FunRice
	743	Os07g0181000	7	1.39488	0.0460797	OsPK2|W59|OsPKpalpha1	grain	FunRice
	744	Os07g0182000	7	1.03137	6.73e-07	RISBZ1, OsbZIP58, OsEnS-92	Basic leucine zipper transcriptional activator, Grain filling (Os07t0182000-01)	rapdb
	745	Os07g0182900	7	2.59142	0.00655178	OsMet1-2|OsMET1b	panicle	FunRice
	746	Os07g0184900	7	-1.35609	1.11e-07	OsKu70	flower	FunRice
	747	Os07g0186000	7	-1.72933	0.00484292	OsTrx23|OsTRXh1	tiller	FunRice
	748	Os07g0188800	7	-1.18144	0.0435743	MMSDH	leaf	FunRice
	749	Os07g0192300	7	-1.06205	0.0267408	NAL11	NARROW LEAF 11	rapdb
	750	Os07g0206700	7	1.26311	0.0502311	SMT1-1	TO:0000145 - internode length, TO:0000206 - leaf angle, TO:0000136 - relative water content, TO:0000135 - leaf length, TO:0000370 - leaf width, TO:0000276 - drought tolerance, TO:0000207 - plant height, TO:0000040 - panicle length	Oryzabase
	751	Os07g0222300	7	-1.17647	0.019282	EIF3E	TO:0000269 - 100-seed weight, TO:0000399 - grain thickness, TO:0000145 - internode length, TO:0000040 - panicle length, TO:0000262 - panicle shape, TO:0000734 - grain length, TO:0000207 - plant height, TO:0000456 - spikelet number, TO:0006032 - panicle size, TO:0000227 - root length, TO:0002757 - flag leaf length	Oryzabase
	752	Os07g0225300	7	-1.75615	0.0381315	NAC67	grainlength	Ricyer DB
	753	Os07g0252400	7	2.40819	0.0147762	CESA6	Dwarf	OGRO databse
	754	Os07g0257200	7	3.68805	0.0474614	OsNramp5	yield	Tang et al. 2017
	755	Os07g0262200	7	-1	3.92e-06	NAL8	Prohibitin complex 2&alpha; subunit, Regulation of leaf morphology and spikelet number, Regulation of mitochondria and chloroplasts stability, Regulation of photosynthetic efficiency and cell division (Os07t0262200-02)	rapdb
	756	Os07g0412100	7	3.57263	0.020468	GBSSII	grainlength	Ricyer DB
	757	Os07g0476500	7	1.09139	0.049243	CYP21-4	TO:0006001 - salt tolerance, TO:0002657 - oxidative stress, TO:0000615 - abscisic acid sensitivity, TO:0000143 - relative biomass, TO:0000371 - yield trait, TO:0000181 - seed weight	Oryzabase
	758	Os07g0490200	7	2.38	0.000401	OsCBT	leaf	FunRice
	759	Os07g0492000	7	-2.84087	0.0264	OsNDPK1	leaf	FunRice
	760	Os07g0497100	7	-0.95513	0.00133257	CHR729, OsCHR4, CRL6	Chromodomain, helicase/ATPase, and DNA-binding domain (CHD) protein, Chromatin-remodeling factor, Mi-2-like protein, Crown root development, Chloroplast development in adaxial mesophyll, Maintenance of H3K4me3 (Os07t0497100-01)	rapdb
	761	Os07g0505200	7	1.45	8.13e-05	OsSPL13	grain size	Si et al. 2016
	762	Os07g0515100	7	1.45336	0.0521764	OsCDPK2|OsCPK2	flower	FunRice
	763	Os07g0516300	7	-1.86373	0.0335962	OsS40-15	A member of S40 gene family, Leaf senescence, Response to pathogen infection (Os07t0516300-01)	rapdb
	764	Os07g0529000	7	-7.95191	0.00300044	ICL	TO:0006001 - salt tolerance, TO:0000249 - leaf senescence, TO:0000276 - drought tolerance, TO:0000524 - submergence tolerance	Oryzabase
	765	Os07g0546000	7	1.17787	0.0119548	IPI	TO:0000326 - leaf color, TO:0000495 - chlorophyll content, TO:0000496 - carotenoid content, TO:0000075 - light sensitivity	Oryzabase
	766	Os07g0558500	7	1.12448	1.3e-06	NYC4	leaf	FunRice
	767	Os07g0559700	7	1.79366	0.0159	OsMST6	grain	FunRice
	768	Os07g0563300	7	1.31048	0.0343345	GD1	flower	FunRice
	769	Os07g0568700	7	1.09931	2.15e-05	OsFOR1|PGIP	panicle	FunRice
	770	Os07g0573900	7	-1.2703	0.000354	AGP27	TO:0000621 - inflorescence development trait	Oryzabase
	771	Os07g0586900	7	-1.01351	2.8e-07	OsSHR1	SHR transcription factor, Formation of root endodermis and leaf stomata, Regulation of the number of cortex cell layers in the root (Os07t0586900-01)	rapdb
	772	Os07g0592600	7	-1.04	0.0386	OsGH3.8|OsGH3-8|OsMGH3	flower	FunRice
	773	Os07g0593000	7	1.32544	1.05e-05	OsZFP7	C2H2 transcription factor, Leaf development (Os07t0593000-01)	rapdb
	774	Os07g0603300	7	2.86391	0.0494397	GL7	Extra-long Grains	Xia et al. 2018
	775	Os07g0603700	7	1.42165	0.0227115	GE	embryo development	Nagasawa et al. 2013
	776	Os07g0603800	7	2.03504	0.0233609	OsNPF7.1a, OsNPF7.1	Nitrate transporter, Regulation of tiller number and grain yield (Os07t0603800-01);Similar to peptide transporter PTR2. (Os07t0603800-02);Nitrate transporter, Regulation of tiller number and grain yield (Os07t0603800-03)	rapdb
	777	Os07g0604300	7	-1.9586	2.7e-06	BC1L6	PO:0007633 - endosperm development stage , PO:0009010 - seed	Oryzabase
	778	Os07g0605200	7	3.54	1.32e-08	OsMADS18	flower	FunRice
	779	Os07g0606600	7	-2.77195	8.91e-05	HAP3F	TO:0000137 - days to heading, TO:0002616 - flowering time	Oryzabase
	780	Os07g0613300	7	-0.966944	0.000417533	PSD	leaf	FunRice
	781	Os07g0616000	7	2.44583	0.0120094	DEP2	panicle growth,elongation	Li et al. 2010
	782	Os07g0616800	7	2.34144	6.36e-05	RSUS3|SUS3|OsSUS3	grain	FunRice
	783	Os07g0617000	7	-1.33551	0.0167581	ERF65	TO:0000437 - male sterility	Oryzabase
	784	Os07g0637300	7	-1.69831	0.0158632	OsPDK1	leaf	FunRice
	785	Os07g0650600	7	4.0884	0.000266	OsBLE2	leaf	FunRice
	786	Os07g0667300	7	-1.28607	0.000116	OsCOL13, OsBBX23, OsCCT27, OsR	CONSTANS-like transcriptional activator, Negative regulation of flowering (Os07t0667300-01)	rapdb
	787	Os07g0668900	7	-1.37495	0.00266273	RLCK240	TO:0000276 - drought tolerance, TO:0000074 - blast disease, TO:0000175 - bacterial blight disease resistance, TO:0000621 - inflorescence development trait, TO:0000653 - seed development trait	Oryzabase
	788	Os07g0669200	7	1.00166	6.12e-07	OBGC1	TO:0000326 - leaf color	Oryzabase
	789	Os07g0669500	7	1.13992	0.000407	FZP	grain size, sterile lemma fate	Ren et al. 2018
	790	Os07g0673200	7	1.21494	1.13e-06	NAL1	photosynthesis rate	Takai et al. 2013
	791	Os07g0673900	7	2.50855	8.3e-05	OsHIGD2	leaf	FunRice
	792	Os07g0681300	7	2.35216	0.0140388	CYP714B1	dwarf	Ricyer DB
	793	Os07g0684900	7	2.87104	2.37e-08	WOX11	tiller	FunRice
	794	Os07g0685000	7	-1.10004	0.0463941	OsDof24	leaf	FunRice
	795	Os07g0686800	7	1.28237	5.32e-08	RLCK241	TO:0000621 - inflorescence development trait, TO:0000175 - bacterial blight disease resistance, TO:0000074 - blast disease, TO:0006001 - salt tolerance	Oryzabase
	796	Os07g0690900	7	-1.05965	1.29e-06	BC1L8	BRITTLE CULM-LIKE 8	Oryzabase
	797	Os07g0693000	7	1.58526	0.031778	RLCK242	TO:0000653 - seed development trait, TO:0006001 - salt tolerance, TO:0000276 - drought tolerance, TO:0000621 - inflorescence development trait	Oryzabase
	798	Os07g0694700	7	-2.21647	9.38e-10	OsAPX2|APXb	leaf	FunRice
	799	Os07g0695100	7	-2.57535	0.0226263	GHD7	heading date,yield	Xue et al. 2007
	800	Os01g0350900	8	-1.35816	0.00711098	IPA1	dwarf	Ricyer DB
	801	Os08g0101000	8	1.21627	0.0227642	IDEF1	leaf	FunRice
	802	Os08g0101500	8	-1.55954	0.0257142	OsMOT1;1	grain	FunRice
	803	Os08g0104600	8	1.56	0.00163	ADI1	productivity	Ricyer DB
	804	Os08g0105000	8	6.50206	0.00116965	EHD3	Homeodomain (PHD) transcriptional regulator, Flowering promoter (Os08t0105000-01);Zinc finger, RING/FYVE/PHD-type domain containing protein. (Os08t0105000-02);Similar to PHD-finger family protein. (Os08t0105000-03)	rapdb
	805	Os08g0109300	8	1.58662	0.0487851	AK1	TO:0000293 - chlorophyll-a content, TO:0000295 - chlorophyll-b content, TO:0000495 - chlorophyll content, TO:0002715 - chloroplast development trait, TO:0000447 - filled grain number, TO:0000201 - panicle color, TO:0000371 - yield trait, TO:0002724 - leaf sheath color, TO:0000069 - variegated leaf, TO:0000326 - leaf color, TO:0000316 - photosynthetic ability	Oryzabase
	806	Os08g0112700	8	1.48398	0.0096417	MADS26	TO:0000175 - bacterial blight disease resistance, TO:0000074 - blast disease, TO:0000621 - inflorescence development trait, TO:0000276 - drought tolerance	Oryzabase
	807	Os08g0115200	8	1.22906	0.0326307	OsIQD14	rice grain shape	Yang et al. 2018
	808	Os08g0117000	8	2.20072	0.0218246	PSS1	panicle	FunRice
	809	Os08g0118000	8	1.20995	0.0372146	OsAHL1|AHL1	panicle	FunRice
	810	Os08g0127100	8	2.35	8.52e-07	OsHT|OsLHT1	grain	FunRice
	811	Os08g0143400	8	1.11049	0.0392041	Hd18, OsHDMA703, HDMA703	SWIRM and amine oxidase domain-containing protein, Homolog of Arabidopsis FLOWERING LOCUS D (FLD), Control of flowering time (Os08t0143400-01);Similar to cDNA clone:J013128B21, full insert sequence. (Os08t0143400-02)	rapdb
	812	Os08g0151300	8	5.54737	0.0113598	CEF1, OsMYB103, OsMYB103L, CEF1/OsMYB103L	R2R3-MYB transcription factor, Regulation of leaf shape, cellulose synthesis and mechanical strength (Os08t0151300-01);Myb transcription factor domain containing protein. (Os08t0151300-02)	rapdb
	813	Os08g0155400	8	1.10435	6.02e-07	OsNRT1.1A/ OsNPF6.3	yield	Wang et al. 2018
	814	Os08g0156900	8	-1.62421	0.0110823	TOP6A2|OsTOP6A2	flower	FunRice
	815	Os08g0157500	8	1.723	0.0507085	ROMT9	TO:0000733 - lignin biosynthesis trait, TO:0000731 - lignin content, TO:0000160 - UV light sensitivity, TO:0000051 - stem strength, TO:0000011 - nitrogen sensitivity, TO:0000460 - light intensity sensitivity	Oryzabase
	816	Os08g0159500	8	-1.06	1.01e-06	OsLSD1	flower	FunRice
	817	Os08g0163400	8	1.41682	0.0139905	YGL13	YELLOW-GREEN LEAF 13	rapdb
	818	Os08g0167000	8	-3.01309	0.0078011	OsABCG18	ABC Transporter, Half-size ATP-binding cassette transporter, Control of long-distance transport of cytokinins from root to shoot, Promotion of grain yield (Os08t0167000-01)	rapdb
	819	Os08g0174700	8	-1.64042	0.0286299	OsBISERK1|OsSERK1|OsBAK1|TBP1	grain	FunRice
	820	Os08g0189900	8	6.41458	4.67e-11	GLP8-10	TO:0000439 - fungal disease resistance, TO:0000315 - bacterial disease resistance, TO:0000424 - brown planthopper resistance, TO:0000303 - cold tolerance, TO:0000015 - oxygen sensitivity, TO:0000444 - parasitic weed, TO:0000276 - drought tolerance, TO:0006001 - salt tolerance, TO:0000074 - blast disease, TO:0000653 - seed development trait, TO:0000621 - inflorescence development trait	Oryzabase
	821	Os08g0200600	8	5.45	1.25e-10	OMTN6	Panicle flower	OGRO databse
	822	Os08g0205400	8	1.09	3.59e-06	OsATX1	leaf	FunRice
	823	Os08g0206900	8	-1.21757	0.0342722	SPL29, UAP1	UDP-N-acetylglucosamine pyrophosphorylase 1, Regulation of leaf senescence, Defence responses (Os08t0206900-01)	rapdb
	824	Os08g0207500	8	1.15	0.00496	OsZIP4	flower	FunRice
	825	Os08g0224300	8	1.14465	4.67e-06	ARE1, OsARE1	Determination of the grain yield, Modulation of nitrogen utilization (Os08t0224300-01)	rapdb
	826	Os08g0237000	8	1.13117	0.0009276	OsXTH8	leaf	FunRice
	827	Os08g0237800	8	2.86072	2.44e-06	XTH8	Biochemical character, Reproductive organ - Spikelet, flower, glume, awn	Oryzabase
	828	Os08g0323700	8	3.74663	0.0490995	OsCCC1	leaf	FunRice
	829	Os08g0345800	8	2.19646	0.0314127	OsAGPS2a	Cytosolic ADP-glucose pyrophosphorylase small subunit 2b, Starch synthesis in the middle to late stage of developing endosperm (Os08t0345800-01);Chloroplastic ADP-glucose pyrophosphorylase small subunit 2a, Starch synthesis in the leaf (Os08t0345800-02);Similar to Isoform 2 of Glucose-1-phosphate adenylyltransferase small subunit, chloroplastic/amyloplastic. (Os08t0345800-03);Similar to Isoform 2…	rapdb
	830	Os08g0407200	8	-1.18626	0.00271462	PAY1	plant architecture and yield	Zhao et al. 2015
	831	Os08g0408500	8	1.48	2.88e-05	ERF48	TO:0000456 - spikelet number, TO:0000656 - root development trait, TO:0000152 - panicle number, TO:0000590 - grain weight, TO:0000207 - plant height, TO:0000227 - root length, TO:0000115 - root mass density, TO:0000276 - drought tolerance, TO:0006001 - salt tolerance, TO:0000396 - grain yield	Oryzabase
	832	Os08g0425800	8	1.24	7.91e-05	DRP2	TO:0000493 - leaf composition trait	Oryzabase
	833	Os08g0433500	8	-1.4065	4.45e-07	NAC106, ONAC106	Senescence-associated NAC transcription factor, Negative regulation of leaf senescence, Salt stress tolerance, Plant architecture (Os08t0433500-01)	rapdb
	834	Os08g0434100	8	1.63322	1.48e-06	PD2	seed	Ricyer DB
	835	Os08g0435900	8	1.2	0.0035	DYE1	TO:0000495 - chlorophyll content, TO:0000326 - leaf color, TO:0002664 - leaf yellowing tolerance	Oryzabase
	836	Os08g0440800	8	1.2547	0.0548632	OsGAPDH	panicle	FunRice
	837	Os08g0442700	8	3.1167	0.0132648	COE1	Vegetative organ - Leaf	Oryzabase
	838	Os08g0445700	8	1.71285	2.02e-06	OsTPS8	yield related traits	Vishal et al. 2018
	839	Os08g0460000	8	4.84119	0.045082	GLP1	TO:0000303 - cold tolerance, TO:0000621 - inflorescence development trait	Oryzabase
	840	Os08g0462700	8	2.17481	0.00576867	OsBRXL4	tiller	FunRice
	841	Os08g0465800	8	2.05346	0.00673	GAD1	Grain number,grain length	Jin et al. 2016
	842	Os08g0473900	8	3.08729	6.79e-06	AMY3D	TO:0000449 - grain yield per plant, TO:0000114 - flooding related trait, TO:0000168 - abiotic stress trait, TO:0000253 - seed dormancy, TO:0000432 - temperature response trait, TO:0000280 - seedling vigor	Oryzabase
	843	Os08g0475500	8	-1.18739	0.000103	OsCEP6, OsCEP6.1	C-terminally encoded peptide, Regulation of panicle and grain development, Regulation of root and seedling growth (Os08t0475500-01)	rapdb
	844	Os08g0482300	8	1.16778	1.09e-07	AGP1	TO:0000615 - abscisic acid sensitivity, TO:0000621 - inflorescence development trait, TO:0006001 - salt tolerance, TO:0000276 - drought tolerance	Oryzabase
	845	Os08g0484600	8	2.44	1.75e-06	OSK4	TO:0000653 - seed development trait, TO:0000137 - days to heading	Oryzabase
	846	Os08g0492500	8	-1.27414	0.000324	OsRHP1	leaf	FunRice
	847	Os08g0495800	8	1.93152	1.19e-08	OSH69	Vegetative organ - Leaf	Oryzabase
	848	Os08g0500100	8	3.45783	0.0479846	OsPEX5	leaf	FunRice
	849	Os08g0504700	8	1.73	0.00016	SAP11, OsDOG, OsSAP11	Gibberellin-induced A20/AN1 zinc-finger protein, Negative regulation of GA (gibberellin) -mediated cell elongation (Os08t0504700-01)	rapdb
	850	Os08g0506700	8	-1.05968	0.0409599	OsFBH1, OsbHLH112, DLN213, OsDLN213	FLOWERING BHLH 1, basic helix-loop-helix protein 112, DLN repressor 213, DLN motif protein 213	rapdb
	851	Os08g0508800	8	3.97307	1.94e-10	OsHI-LOX|OsLOX9	leaf	FunRice
	852	Os08g0509600	8	1.40676	1.8e-05	Ideal Plant Architecture1	yield	Liu et al. 2019
	853	Os08g0511200	8	1.28	0.00576	CUC3	Vegetative organ - Leaf, Seed - Morphological traits - Embryo	Oryzabase
	854	Os08g0513700	8	1.23474	0.0440938	SPL15	TO:0000207 - plant height, TO:0000063 - mimic response	Oryzabase
	855	Os08g0520900	8	2.15163	0.00797188	ISA1	TO:0000615 - abscisic acid sensitivity, TO:0000099 - sugary endosperm, TO:0002658 - starch grain synthesis, TO:0000734 - grain length, TO:0000399 - grain thickness	Oryzabase
	856	Os08g0529000	8	1.64038	0.00514	OsPIN5b	yield	KrishnaMurth et al. 2016
	857	Os08g0531600	8	-1.84642	2.45e-06	GW8	grain size	Wang et al., 2012
	858	Os08g0532200	8	-1.17	0.00025	GSA	productivity	Ricyer DB
	859	Os08g0535200	8	-2.62542	0.0386095	SWEET11 and 15	seed filling	Yang et al. 2018
	860	Os08g0536300	8	2.1311	0.0107371	OsCOL15	grain	FunRice
	861	Os08g0537800	8	-1.29912	0.0150816	WTG1, OsOTUB1	Otubain-like protease with deubiquitination activity, Determination of grain size and shape (Os08t0537800-01)	rapdb
	862	Os08g0539300	8	4.15607	0.0112498	OsRFI2	C3HC4-type zinc finger protein, Target of miR528, Regulation of flowering under LD conditions (Os08t0539300-01)	rapdb
	863	Os08g0541400	8	1.50211	4.2e-09	OsFKBP16-3	leaf	FunRice
	864	Os08g0546300	8	-1.05524	1.53e-06	OSC4	Reproductive organ - Spikelet, flower, glume, awn	Oryzabase
	865	Os08g0549100	8	-1.03995	0.0524334	OsAPX4	leaf	FunRice
	866	Os08g0554400	8	-1.85153	0.00579847	OsIDD6	flowering	FunRice
	867	Os08g0557700	8	-1.34465	0.00730675	AHP1	TO:0000420 - fertility related trait, TO:0000346 - tiller number, TO:0006001 - salt tolerance, TO:0000095 - osmotic response sensitivity, TO:0000656 - root development trait, TO:0000167 - cytokinin sensitivity, TO:0000207 - plant height, TO:0000249 - leaf senescence	Oryzabase
	868	Os08g0560000	8	1.23823	0.000197	SLC1, OsGA20ox7	2-oxoglutarate-dependent dioxygenase, Gibberellin 20 oxidase, Shoot development, Salicylic acid (SA) production, Phytohormone homeostasis (Os08t0560000-01)	rapdb
	869	Os08g0562200	8	-2.34799	0.0303268	OsNTL5	Membrane-bound NAC-like transcription factor, Transcriptional repressor, Suppression of flowering (Os08t0562200-02);Hypothetical conserved gene. (Os08t0562200-03)	rapdb
	870	Os08g0562500	8	3.7349	0.0213988	SLG	BAHD acyltransferase-like protein, Control of grain size and leaf angle, Regulation of brassinosteroid homeostasis (Os08t0562500-01);Similar to Acyltransferase. (Os08t0562500-02)	rapdb
	871	Os01g0131600	9	2.72085	0.00379026	EREBP	dwarf,grainweight,paniclenumber,seed	Ricyer DB
	872	Os09g0114500	9	-1.15229	2.79e-07	SRG1	grain size	Duan et al. 2014
	873	Os09g0133600	9	-1.81239	0.0101294	OsFBN1	tiller	FunRice
	874	Os09g0240200	9	-1.28227	0.00804	OsCO3	flower	FunRice
	875	Os09g0279600	9	-1.35365	0.00492193	OsTOP6B	flower	FunRice
	876	Os09g0286400	9	1.84134	0.000391	OsNHX5	grain	FunRice
	877	Os09g0286600	9	-1.49755	0.000208	Sub1C	flower	FunRice
	878	Os09g0298200	9	3.26	1.94e-06	OsAPS1|OsAGPS1	leaf	FunRice
	879	Os09g0299200	9	-2.39147	0.0197297	OsROC1|OsMYBc	leaf	FunRice
	880	Os09g0325700	9	-1.28	0.00443	PP2C1, OsPP2C1, OsSIPP2C1, OsPP2C68, PP2C68, OsPP108	Protein phosphatase 2C, Abiotic stress response, Early panicle development (Os09t0325700-01)	rapdb
	881	Os09g0346500	9	2.86443	0.0498	CAB1R	TO:0002715 - chloroplast development trait, TO:0000159 - blue light sensitivity, TO:0000158 - red light sensitivity	Oryzabase
	882	Os09g0365900	9	1.05906	1.23e-05	OsORAP1	leaf	FunRice
	883	Os09g0380200	9	-3.49054	0.000183	OsV<sub>5A</sub>, YLC1	Chaperone-like protein of protochlorophyllide oxidoreductase (POR), J-like protein, Chloroplast-localized protein containing DUF3353, Regulation of chlorophyll biosynthesis, Chlorophyll and lutein accumulation, Chloroplast development (Os09t0380200-01)	rapdb
	884	Os09g0396900	9	2.1	0.00178	OsVIT2	leaf	FunRice
	885	Os09g0422500	9	3.34322	0.0320836	Bc6|OsCesA9	flower	FunRice
	886	Os09g0424300	9	-1.03148	0.0499161	SAMDC1	productivity	Ricyer DB
	887	Os09g0439800	9	2.07001	0.004607	DEEPER ROOTING 1	yield	Uga et al. 2013Arai-Sanoh et al. 2014
	888	Os09g0441400	9	1.13849	0.0432774	EP	grain	FunRice
	889	Os09g0441900	9	1.13849	0.0432774	DEP1	Yield,NUE,denese and erect panicle1	Huang et al. 2009,Xu et al. 2016
	890	Os09g0442100	9	2.65033	0.00194797	RLCK272	TO:0000653 - seed development trait, TO:0000621 - inflorescence development trait, TO:0006001 - salt tolerance, TO:0000303 - cold tolerance, TO:0000276 - drought tolerance	Oryzabase
	891	Os09g0442700	9	1.95299	0.0260081	OsDDM1a	Dwarf	OGRO databse
	892	Os09g0451000	9	-1.4346	1.75e-05	aco1	Dwarf	OGRO databse
	893	Os09g0456100	9	-1.08219	1.21e-05	LP1	Pnicle length	Liu et al. 2016
	894	Os09g0456200	9	-1.69965	6.14e-08	BZIP72	TO:0000276 - drought tolerance, TO:0000615 - abscisic acid sensitivity, TO:0000249 - leaf senescence	Oryzabase
	895	Os09g0456800	9	-2.67947	8.55e-09	OsHsf23	leaf	FunRice
	896	Os09g0457900	9	4.65524	0.0239625	OsEATB/AP2/ERF	tillers,panicle branches,plant height	Qi et al. 2011
	897	Os09g0459200	9	2.23741	0.0147369	SG1	grain	FunRice
	898	Os09g0466400	9	-1.79971	0.0438764	OsZHD1	Zinc finger homeodomain (ZF-HD) class homeobox transcription factor, Rice morphogenesis, Modulation of leaf rolling (Os09t0466400-01)	rapdb
	899	Os09g0470500	9	-1.62723	1.43e-09	Oshox4	leaf	FunRice
	900	Os09g0480900	9	-4.69485	0.0422727	RA8	flower	FunRice
	901	Os09g0494200	9	-1.95208	0.0318341	BC15	BRITTLE CULM 15	Oryzabase
	902	Os09g0505400	9	-1.88994	4.5e-08	OsPIN5b	yield	KrishnaMurth et al. 2016
	903	Os09g0507100	9	-1.19671	2.87e-06	OsSPL18	Plant-specific transcription factor, Regulation of panicle development, Control of grain weight and grain number (Os09t0507100-01)	rapdb
	904	Os09g0507200	9	1.95907	0.0234521	OsMADS8|OsMADS24	flower	FunRice
	905	Os09g0510500	9	4.80066	0.0290919	OsBC1, OsbHLH081, OsbHLH082	Basic helix-loop-helix (bHLH) transcriptional activator, Control of leaf angle and grain size (Os09t0510500-01)	rapdb
	906	Os09g0511600	9	-1.08811	1.5e-07	Os9BGlu31	leaf	FunRice
	907	Os09g0513500	9	-2.44309	1.31e-05	FTL4	FLOWERING TIME LIKE GENE 4	rapdb
	908	Os09g0516200	9	-1.73155	0.00364615	RF2a|OsbZIP75	flower	FunRice
	909	Os09g0516300	9	-4.64065	0.0438712	OsRRMh	flower	FunRice
	910	Os09g0521900	9	-6.64171	0.00329504	RAD	seed	Ricyer DB
	911	Os09g0522000	9	-5.45077	3.64e-08	DREB1B	productivity	Ricyer DB
	912	Os09g0522200	9	-2.05488	4.06e-07	DREB1A	productivity	Ricyer DB
	913	Os09g0529300	9	1.83116	0.00458562	TAC1	tiller angel	Jiang et al. 20012
	914	Os09g0532000	9	-1.26184	7.9e-05	SGR, sgr(t), sgr, OsSGR	Senescence-inducible chloroplast protein, Activation of the chlorophll-degrading pathway during leaf senescence (Os09t0532000-01)	rapdb
	915	Os09g0532400	9	3.35196	0.0471582	OsPRR95	Circadian-associated rice pseudo response regulator, Control of flowering time (Os09t0532400-01);Signal transduction response regulator, receiver region domain containing protein. (Os09t0532400-02)	rapdb
	916	Os09g0533400	9	1.30918	3.03e-07	OsLon1	leaf	FunRice
	917	Os09g0533600	9	-1.06107	7.61e-05	BSR1	leaf	FunRice
	918	Os09g0537700	9	3.67231	0.0300108	OsRNS4|OsRRP	tiller	FunRice
	919	Os09g0543100	9	2.23333	0.0242458	PLDdelta1	Biochemical character, Reproductive organ - Spikelet, flower, glume, awn	Oryzabase
	920	Os09g0545000	9	-4.5802	0.0457333	CHX3	Biochemical character, Reproductive organ - Spikelet, flower, glume, awn	Oryzabase
	921	Os09g0545300	9	1.88	0.000342	SAUR39	Dwarf	OGRO databse
	922	Os09g0553200	9	-3.99728	0.0113036	Ugp1	Dwarf	OGRO databse
	923	Os09g0554000	9	-1.89648	3.88e-08	PT20	TO:0000102 - phosphorus sensitivity	Oryzabase
	924	Os09g0560900	9	-0.996784	0.001709	SIP1	C2H2-type zinc finger transcription factor, Promotion of flowering (Os09t0560900-01);C2H2 zinc finger protein, Transcription factor, Regulation of flowering time (Os09t0560900-02)	rapdb
	925	Os09g0563300	9	-1.95473	0.0158662	TCD9, OsCPn60alpha3, OsCPn60&alpha;3	Similar to GroEL-like chaperone, ATPase. (Os09t0563300-01);Alpha subunit of chaperonin protein 60, Chloroplast development at early leaf stage (Os09t0563300-02)	rapdb
	926	Os09g0567400	9	3.05952	0.000484	AHP2	TO:0000656 - root development trait, TO:0006001 - salt tolerance, TO:0000095 - osmotic response sensitivity, TO:0000420 - fertility related trait, TO:0000346 - tiller number, TO:0000249 - leaf senescence, TO:0000207 - plant height, TO:0000167 - cytokinin sensitivity	Oryzabase
	927	Os09g0569800	9	-1.44882	2.27e-08	RLCK280	TO:0000175 - bacterial blight disease resistance, TO:0000074 - blast disease, TO:0000621 - inflorescence development trait, TO:0000653 - seed development trait	Oryzabase
	928	Os09g0570100	9	-2.57359	7.18e-10	RLCK282	TO:0000653 - seed development trait, TO:0000621 - inflorescence development trait	Oryzabase
	929	Os09g0570800	9	2.5379	0.000136	SLC2	Dioxygenase, Shoot development, Salicylic acid (SA) production, Phytohormone homeostasis (Os09t0570800-01)	rapdb
	930	Os10g0101200	10	-2.37771	0.000126657	SCP45, OsSCP45, OsSCP46, SCP46	Serine carboxypeptidase, Regulation of grain filling and seed germination (Os10t0101200-01)	rapdb
	931	Os10g0112100	10	-2.57066	7.45e-08	OsFWL5, OsPcr1, PCR1, OsPCR1	Member of the PLAC8 domain-containing protein family, Maintenance of metal ion homeostasis and grain weight, Negative regulation of plant height (Os10t0112100-01)	rapdb
	932	Os10g0117000	10	-2.12006	0.0313564	XTH27	Biochemical character, Reproductive organ - Spikelet, flower, glume, awn	Oryzabase
	933	Os10g0177200	10	2.29839	0.0356314	OsDSR-1	panicle	FunRice
	934	Os10g0370500	10	2.72839	1.48e-08	GH5BG	leaf	FunRice
	935	Os10g0389200	10	-2.97878	0.00528254	OsRCCR1, RCCR1	Red chlorophyll catabolite reductase, Leaf senescence, Wound responses (Os10t0389200-01)	rapdb
	936	Os10g0390800	10	2.66759	4.71e-07	EBL1	Dwarf	OGRO databse
	937	Os10g0391400	10	-1.32213	0.0172	TIFY11E	TO:0000576 - stem length, TO:0000172 - jasmonic acid sensitivity, TO:0000040 - panicle length, TO:0002736 - flower number, TO:0000207 - plant height, TO:0000180 - spikelet fertility, TO:0000137 - days to heading	Oryzabase
	938	Os10g0392400	10	-1.47	0.00226	TIFY11D	TO:0000020 - black streak dwarf virus resistance, TO:0002757 - flag leaf length, TO:0000040 - panicle length, TO:0000207 - plant height, TO:0000180 - spikelet fertility, TO:0000137 - days to heading, TO:0002736 - flower number, TO:0000576 - stem length, TO:0000590 - grain weight, TO:0000172 - jasmonic acid sensitivity, TO:0000276 - drought tolerance	Oryzabase
	939	Os10g0397400	10	-2.59914	0.0197639	LTBSG1	Panicle and grain development	Qin et al. 2018
	940	Os10g0403000	10	-1.05139	9.58e-06	PLA1, pla1, plt1, CYP78A11	Cytochrome P450 protein, CYP78A11, Regulation of leaf initiation rate and vegetative-reproductive phase change (Os10t0403000-01)	rapdb
	941	Os10g0416200	10	2.57734	0.0118516	ONI2	leaf	FunRice
	942	Os10g0419400	10	3.56222	1.56e-08	SIP2	TO:0000136 - relative water content, TO:0000131 - leaf water potential, TO:0000163 - auxin sensitivity, TO:0000615 - abscisic acid sensitivity, TO:0000173 - ethylene sensitivity, TO:0000566 - stomatal frequency, TO:0000249 - leaf senescence, TO:0000095 - osmotic response sensitivity, TO:0006001 - salt tolerance, TO:0000276 - drought tolerance, TO:0000524 - submergence tolerance, TO:0000303 - cold…	Oryzabase
	943	Os10g0442800	10	2.8139	0.0044	RLCK301	TO:0006001 - salt tolerance, TO:0000074 - blast disease, TO:0000175 - bacterial blight disease resistance, TO:0000621 - inflorescence development trait, TO:0000653 - seed development trait	Oryzabase
	944	Os10g0444600	10	2.11515	1.23e-07	OsPht1;3|OsPT3	leaf	FunRice
	945	Os10g0444700	10	2.1968	5.08e-06	OsPht1;8|OsPT8	grain	FunRice
	946	Os10g0463800	10	-1.8241	2.67e-05	FLO7	grain	FunRice
	947	Os10g0467800	10	1.05293	0.00476	CESA7	TO:0000011 - nitrogen sensitivity, TO:0000051 - stem strength, TO:0000640 - total root number	Oryzabase
	948	Os10g0471700	10	-1.07023	0.00119	OsiICK6	leaf	FunRice
	949	Os10g0478000	10	5.99107	0.00107417	TAW1 and APO1	number of spikelets per panicle,yield	Fukushima et al. 2017
	950	Os10g0483500	10	1.99846	0.00699156	CKX3	grainweight,productivity	Ricyer DB
	951	Os10g0485600	10	-1.06164	0.000305	OsDCL3b	grain	FunRice
	952	Os10g0496900	10	1.55431	0.00590104	FGL, OsPorB, OsPORB, fgl(fl), fl, fgl	Similar to Protochlorophyllide reductase B, chloroplastic. (Os10t0496900-01);NADPH: protochlorophyllide oxidoreductase, Chlorophyll synthesis (Os10t0496900-02)	rapdb
	953	Os10g0497700	10	-1.01268	0.0412	BC1L9	PO:0025034 - leaf	Oryzabase
	954	Os10g0508100	10	-1.36019	0.00412192	GFR1	DUF641 domain containing protein, Regulation of grain-filling rate (Os10t0508100-01)	rapdb
	955	Os10g0525000	10	-1.07	0.00342	CYP704A5	TO:0000621 - inflorescence development trait	Oryzabase
	956	Os10g0528200	10	-4.38774	0.0200213	GST	dwarf,seed	Ricyer DB
	957	Os10g0547500	10	1.99554	0.019138	Lsi3	leaf	FunRice
	958	Os10g0548700	10	1.63052	0.011198	RLCK306, OsPUB54, OsRLCK306, NRRB	Receptor-like cytoplasmic kinase, Various stress responses, Regulation of resistance to bacterial leaf streak (BLS) (Os10t0548700-01);Hypothetical conserved gene. (Os10t0548700-02)	rapdb
	959	Os10g0555100	10	1.6636	0.0385035	GGT	TO:0000657 - spikelet anatomy and morphology trait, TO:0000207 - plant height	Oryzabase
	960	Os10g0555600	10	7.09124	5.627e-05	EXPB6	TO:0000207 - plant height	Oryzabase
	961	Os10g0555700	10	5.56478	0.0011639	OsEXPB2	leaf	FunRice
	962	Os10g0555900	10	1.98399	0.0105	EXPB3	TO:0000207 - plant height	Oryzabase
	963	Os10g0556100	10	3.42145	0.000213	EXPB4	TO:0000085 - leaf rolling, TO:0000207 - plant height	Oryzabase
	964	Os10g0558900	10	1.60282	0.00245891	RL14	2OG-Fe (II) oxygenase family protein, Regulation of the secondary cell wall formation in leaves, Modulation of leaf rolling (Os10t0558900-01)	rapdb
	965	Os10g0561800	10	-1.27065	2.08e-06	OsHox1	leaf	FunRice
	966	Os10g0562100	10	-2.14403	0.000387336	MYBS2	TO:0000590 - grain weight, TO:0000276 - drought tolerance, TO:0000259 - heat tolerance, TO:0000095 - osmotic response sensitivity, TO:0000449 - grain yield per plant	Oryzabase
	967	Os10g0562700	10	1.1526	0.0355674	REL2	DUF630 and DUF632 domains containing protein, Control of leaf rolling (Os10t0562700-01)	rapdb
	968	Os10g0562900	10	-1.55002	7.1e-05	ERF96	Vegetative organ - Leaf, Tolerance and resistance - Stress tolerance	Oryzabase
	969	Os10g0564500	10	2	3.48e-08	REK	seed	Ricyer DB
	970	Os10g0567400	10	-2.49807	0.020659	PGL	grain yield	Yang et al. 2016
	971	Os10g0573900	10	-1.01593	3.95e-06	OsNMD3	Seed	OGRO databse
	972	Os10g0577600	10	-3.33078	0.00345111	JMJ706|OsJMJ706	flower	FunRice
	973	Os01g0771200	11	-0.958688	0.0135501	Xa21	grainshape,dwarf,grainweight,productivity,seed	Ricyer DB
	974	Os11g0106700	11	3.11672	0.0259746	OsFER1	panicle	FunRice
	975	Os11g0107000	11	4.30011	0.0266555	OsTBL2, TBL2	Xylan acetyltransferase, Resistance to bacterial leaf blight disease (Os11t0107000-01)	rapdb
	976	Os11g0113700	11	5.16246	7.65e-09	CIPK15	seed	Ricyer DB
	977	Os11g0115400	11	3.20355	3.81e-07	OsLTP5	flower	FunRice
	978	Os11g0117400	11	-1.45872	0.043651	OsWRKY89	leaf	FunRice
	979	Os11g0126900	11	-3.28116	0.0488425	OsNAC10	grain yield	Jeong et al. 2010
	980	Os11g0143200	11	3.21206	0.0167165	CPD1	TO:0002676 - brassinosteroid content, TO:0000159 - blue light sensitivity	Oryzabase
	981	Os11g0148500	11	1.32874	0.0132011	OsPK1	leaf	FunRice
	982	Os11g0153600	11	1.68219	0.0523796	YGL138(t)	Signal recognition particle 54 kDa (SRP54) protein, Chloroplast development (Os11t0153600-01)	rapdb
	983	Os11g0157100	11	1.01046	0.0126152	Cyclin-T1;3	grain	FunRice
	984	Os11g0167800	11	1.9998	0.0501887	ASR5|OsAsr1|OsASR2	leaf	FunRice
	985	Os11g0168200	11	-2.07	0.000154	RPL3B, OsRPL3B, RML1	Ribosomal large subunit protein L3B, Regulation of leaf morphology and plant architecture (Os11t0168200-01);60S ribosomal protein L3. (Os11t0168200-02)	rapdb
	986	Os11g0168600	11	1.7325	4.09e-08	RLCK311	TO:0000621 - inflorescence development trait, TO:0000653 - seed development trait, TO:0006001 - salt tolerance, TO:0000074 - blast disease, TO:0000175 - bacterial blight disease resistance, TO:0000276 - drought tolerance	Oryzabase
	987	Os11g0171300	11	1.54	0.0113	AldP	seed	Ricyer DB
	988	Os11g0184900	11	2.93	3.38e-06	OsNAC5	grain yield	Jeong et al. 2013
	989	Os11g0187200	11	2.26542	0.0468473	OsGATA28	GATA zinc finger family protein, Control of heading date, plant height and panicle length (Os11t0187200-01)	rapdb
	990	Os11g0199200	11	-2.16967	0.00822556	PDIL1-1	seed	Ricyer DB
	991	Os11g0207000	11	-4.7907	0.0396016	SEU	TO:0000621 - inflorescence development trait	Oryzabase
	992	Os11g0210300	11	3.71357	3.1e-05	Adh1	seed	Ricyer DB
	993	Os11g0229500	11	-3.81963	0.0549381	RPR1	productivity	Ricyer DB
	994	Os11g0233800	11	3.79269	0.000631929	RLCK320	TO:0000621 - inflorescence development trait	Oryzabase
	995	Os11g0235200	11	-1.58985	4.34e-09	SP1	panicle branching,grain number	Xing and Zhang, 2010
	996	Os11g0249000	11	-3.55453	9.7e-06	NLS1	NECROTIC LEAF SHEATH 1	rapdb
	997	Os11g0267000	11	1.31262	2.25e-06	GUN4	TO:0000293 - chlorophyll-a content, TO:0000295 - chlorophyll-b content, TO:0001015 - photosynthetic rate, TO:0000496 - carotenoid content, TO:0000326 - leaf color	Oryzabase
	998	Os11g0416900	11	-1.32577	4.93e-08	ABCG28	Biochemical character, Reproductive organ - Spikelet, flower, glume, awn	Oryzabase
	999	Os11g0490600	11	1.82013	0.0079354	LA1, LAZY1, OsLAZY1, OsLazy1	Regulation of shoot gravitropism and tiller angle, Regulation of polar auxin transport (Os11t0490600-01);Hypothetical conserved gene. (Os11t0490600-02)	rapdb
	1000	Os11g0490800	11	-2.98368	0.022371	OsABCI8|TSC1	leaf	FunRice
	1001	Os11g0490900	11	-1.66123	0.0455737	OsWRKY72	flower	FunRice
	1002	Os11g0499600	11	7.20713	0.00257662	OsHSD1, LGF1	Hydroxysteroid dehydrogenase, Cuticle formation, Lipid homeostasis, Submergence tolerance (Os11t0499600-01);Similar to cis-2,3-dihydrobiphenyl-2,3-diol dehydrogenase. (Os11t0499600-02)	rapdb
	1003	Os11g0523800	11	-1.29788	1.45e-08	OsARF1	tiller	FunRice
	1004	Os11g0528700	11	-1.40287	7.18e-06	TLD2	Indole-3-acetic acid (IAA)-amido synthetase, Plant architecture establishment, Drought tolerance (Os11t0528700-01);Indole-3-acetic acid (IAA)-amido synthetase (Os11t0528700-02)	rapdb
	1005	Os11g0547000	11	1.1554	7.78e-06	FKF1, OsFKF1, OsFbox609, Os_F0370	Autonomous floral activator, Promotion of flowering (Os11t0547000-01);Hypothetical conserved gene. (Os11t0547000-02)	rapdb
	1006	Os11g0556400	11	2.71029	0.0155804	RLCK334	TO:0000276 - drought tolerance, TO:0000653 - seed development trait, TO:0006001 - salt tolerance, TO:0000621 - inflorescence development trait	Oryzabase
	1007	Os11g0559200	11	-1.75389	6.42e-08	xa21	leaf	FunRice
	1008	Os11g0582500	11	-2.21034	0.0125702	OSC6	TO:0000432 - temperature response trait	Oryzabase
	1009	Os11g0586400	11	-1.54869	0.0154393	Xa10-Ni	leaf	FunRice
	1010	Os11g0603000	11	1.52262	0.038721	ILI2	INCREASED LEAF INCLINATION 2	rapdb
	1011	Os11g0609600	11	3.64555	0.0193778	GF14H	Reproductive organ - Heading date	Oryzabase
	1012	Os11g0615800	11	-2.57281	0.00470025	OsRad51|OsRad51A1	flower	FunRice
	1013	Os11g0621500	11	2.65	0.000116	ELF4_chr.11	Similar to EARLY FLOWERING 4 (Fragment). (Os11t0621500-01);Non-protein coding transcript. (Os11t0621500-02)	rapdb
	1014	Os11g0637700	11	-1.19592	0.053035	LARGE GRAIN (LGG)	Grain Length and Weight	Heang et al. 2012
	1015	Os11g0667600	11	-1.02332	0.000244	RLCK348	TO:0000621 - inflorescence development trait, TO:0000653 - seed development trait, TO:0006001 - salt tolerance, TO:0000276 - drought tolerance	Oryzabase
	1016	Os11g0707000	11	4.71612	0.0166	OsrcaA1	Dwarf	OGRO databse
	1017	Os12g0101800	12	-1.90861	0.025281	phot1a	leaf	FunRice
	1018	Os12g0104700	12	2.33579	0.0145201	XOAT3	TO:0002681 - leaf curling	Oryzabase
	1019	Os12g0106300	12	4.75521	0.0200528	OsTBL1, TBL1	Xylan acetyltransferase, Resistance to bacterial leaf blight disease (Os12t0106300-01)	rapdb
	1020	Os12g0122000	12	-2.68477	0.000253404	OsSCR2, OsSCR	Transcription factor, Asymmetric division of the cortex/endodermis progenitor cell in the root, Formation of root endodermis and leaf stomata (Os12t0122000-01)	rapdb
	1021	Os12g0132300	12	-1.22413	0.000471	CML3	Reproductive organ - Spikelet, flower, glume, awn	Oryzabase
	1022	Os12g0274700	12	1.67052	4.16e-07	rbcS	leaf	Ricyer DB
	1023	Os12g0277500	12	1.13	0.00123	OsCPn60alpha1|OsCPn60a1	leaf	FunRice
	1024	Os12g0420200	12	1.3	0.026	CSP41b, LGL1	Chloroplast stem-loop-binding protein of 41 kDa b, Chlorophyll biosynthesis and photosynthesis (Os12t0420200-01)	rapdb
	1025	Os12g0465700	12	-1.029	0.0149611	DEC	TO:0000335 - ligule shape	Oryzabase
	1026	Os12g0477400	12	-1.11077	2.95e-06	NAC139	TO:0000276 - drought tolerance, TO:0006001 - salt tolerance, TO:0000625 - spikelet density, TO:0000557 - secondary branch number, TO:0000447 - filled grain number, TO:0000180 - spikelet fertility	Oryzabase
	1027	Os12g0502300	12	-1.17359	0.0199693	CYCA2;1	TO:0000207 - plant height, TO:0000227 - root length, TO:0000566 - stomatal frequency	Oryzabase
	1028	Os12g0548300	12	-1.41	0.000739	OsNDPK2, WSL12	Nucleoside diphosphate kinase, Regulation of chloroplast development and chlorophyll biosynthesis, Abiotic stress response (ABA and salinity) (Os12t0548300-01);Similar to Nucleoside diphosphate kinase (Fragment). (Os12t0548300-02);Similar to Nucleoside diphosphate kinase (Fragment). (Os12t0548300-03)	rapdb
	1029	Os12g0555500	12	-4.0765	0.0456134	OsPR10a|PBZ1	leaf	FunRice
	1030	Os12g0569500	12	2.26536	0.00196	OsOSM1	grain	FunRice
	1031	Os12g0586100	12	-2.00526	0.000221	SAPK9	panicle weight, grain filling	Dey et al. 2016
	1032	Os12g0601400	12	3.51697	0.00321551	OsIAA3	Dwarf	OGRO databse
	1033	Os12g0610600	12	-2.18043	0.0309053	OMTN3	Panicle flower	OGRO databse
	1034	Os12g0614600	12	2.07522	0.0218803	OsPID|OsPINOID	flower	FunRice
	1035	Os12g0617400	12	-2.7971	0.00864923	OsNCED5	9-cis-epoxycarotenoid dioxygenase, Control of ABA biosynthesis, Regulation of salt and water stress tolerance and leaf senescence (Os12t0617400-01)	rapdb
	1036	Os12g0618400	12	-1.26755	0.0494252	LHR	TO:0000370 - leaf width, TO:0000135 - leaf length, TO:0000207 - plant height, TO:0000592 - 1000-dehulled grain weight, TO:0000397 - grain size, TO:0000590 - grain weight, TO:0001027 - net photosynthetic rate, TO:0000522 - stomatal conductance	Oryzabase
	1037	Os12g0618800	12	-4.61103	0.0185389	OsPLS3, OsGCNT	DUF266-containing protein, Beta-1,6-N-acetylglucosaminyl transferase, Regulation of the onset of leaf senescence, Negative-regulator mediating defense response and immunity-associated premature leaf senescence (Os12t0618800-01)	rapdb
	1038	Os12g0626400	12	-1.78101	0.000168286	PSY2	leaf	FunRice
	1039	Os12g0641100	12	-2.38976	0.0255606	OsNHA1|OsSOS1	leaf	FunRice
	1040	Os12g0641400	12	1.34809	0.00299	OsSUT2|OsSUT2M	tiller	FunRice
	1041	Os01g0192300	chr01	2.86	9.02e-06	MYB1R1	TO:0002616 - flowering time, TO:0000461 - basic vegetative phase, TO:0000396 - grain yield, TO:0006021 - vegetative to reproductive phase transition trait	Oryzabase
	1042	Os01g0741900	chr01	1.09219	0.023576	IAA6, OsIAA6	Auxin-responsive protein, Drought tolerance, Control of tiller outgrowth (Os01t0741900-01)	rapdb
	1043	Os01g0757600	chr01	3.21785	0.00462352	OsMY1	panicle	FunRice
	1044	Os01g0764800	chr01	1.18	0.00813	GH3-2	TO:0000020 - black streak dwarf virus resistance, TO:0000303 - cold tolerance, TO:0006001 - salt tolerance, TO:0000145 - internode length, TO:0006032 - panicle size, TO:0000135 - leaf length, TO:0000206 - leaf angle, TO:0002672 - auxin content, TO:0000207 - plant height, TO:0000163 - auxin sensitivity	Oryzabase
	1045	Os01g0814800	chr01	1.09028	7.29e-09	GRA78	TO:0002715 - chloroplast development trait, TO:0000326 - leaf color	Oryzabase
	1046	Os01g0826000	chr01	-1.78736	4.79e-06	OsATX	leaf	FunRice
	1047	Os01g0856500	chr01	1.1746	0.0237912	OsAUX1	tiller	FunRice
	1048	Os01g0866400	chr01	1.2809	0.0092889	MOC2|FBP1	tiller	FunRice
	1049	Os02g0596200	chr02	1.34824	0.0327	LSSR1	Glycoside hydrolase, family 5 protein. (Os02t0596200-01);Putative GH5 cellulase, Regulation of seed setting rate, Promotion of fertilization (Os02t0596200-02)	rapdb
	1050	Os02g0722400	chr02	-1.57285	4.39e-09	OsAAP3	grain yield, tiller number	Lu et al. 2018
	1051	Os04g0550500	chr04	6.9647	0.00293	OsNAGK1|NAGK1	leaf	FunRice
	1052	Os04g0550600	chr04	-1.34808	1.27e-06	HTD1, OsCCD7, D17	Carotenoid cleavage dioxygenase, Negative regulation of the outgrowth of axillary buds, Strigolactones biosynthesis (Os04t0550600-01)	rapdb
	1053	Os04g0650700	chr04	1.78215	5.36e-06	ASNASE2	TO:0000249 - leaf senescence, TO:0000653 - seed development trait	Oryzabase
	1054	Os05g0333200	chr05	1.00475	0.049338	D1, RGA1	&alpha;-subunit of GTP-binding protein, Signal transduction involved in morphogenesis, Gibberellin signal transduction, R gene-mediated disease resistance, Brassinosteroid (BR) response (Os05t0333200-01)	rapdb
	1055	Os05g0343400	chr05	1.19769	0.0408106	WRKY53	TO:0000454 - stem borer resistance, TO:0000074 - blast disease, TO:0000276 - drought tolerance, TO:0000303 - cold tolerance, TO:0000259 - heat tolerance, TO:0006001 - salt tolerance, TO:0000206 - leaf angle, TO:0000397 - grain size, TO:0000391 - seed size, TO:0002677 - brassinosteroid sensitivity	Oryzabase
	1056	Os05g0541400	chr05	3.14398	4.05e-09	OsLF	Atypical bHLH transcription factor, Regulation of flowering time (Os05t0541400-01)	rapdb
	1057	Os05g0575000	chr05	-3.72756	0.00557809	CV	Vegetative organ - Leaf, Tolerance and resistance - Stress tolerance	Oryzabase
	1058	Os05g0578900	chr05	1.24691	0.0263981	NL1, nl1, OsGATA15, SNFL1	GAGA-type zinc finger transcription factor, Organogenesis, Regulation of leaf development (Os05t0578900-01)	rapdb
	1059	Os05g0580000	chr05	1.58	5.77e-08	OsAGPL1	grain yield	Okamura et al. 2013
	1060	Os05g0586200	chr05	1.14211	5.65e-07	JAR1	TO:0006001 - salt tolerance, TO:0000164 - stress trait, TO:0000206 - leaf angle, TO:0002672 - auxin content, TO:0000179 - biotic stress trait, TO:0002668 - jasmonic acid content, TO:0002669 - diterpenoid phytoalexin content, TO:0000172 - jasmonic acid sensitivity, TO:0000021 - copper sensitivity, TO:0000074 - blast disease, TO:0000163 - auxin sensitivity, TO:0000420 - fertility related trait, TO:…	Oryzabase
	1061	Os05g0589700	chr05	3.20292	0.0375369	RLCK191	TO:0006001 - salt tolerance, TO:0000653 - seed development trait, TO:0000621 - inflorescence development trait, TO:0000276 - drought tolerance, TO:0000175 - bacterial blight disease resistance	Oryzabase
	1062	Os06g0528600	chr06	-1.26941	0.00496	OsSPMS1, OsSPDS2	Spermine synthase, Spermidine synthase, Negative regulation of seed germination, grain size, and grain yield, Chilling response	rapdb
	1063	Os07g0186200	chr07	1.27017	0.00187538	OsSIK2	leaf	FunRice
	1064	Os08g0441500	chr08	-1.08078	1.21e-08	CCR20	TO:0000733 - lignin biosynthesis trait, TO:0000051 - stem strength, TO:0000175 - bacterial blight disease resistance, TO:0000731 - lignin content, TO:0000160 - UV light sensitivity, TO:0000074 - blast disease, TO:0000011 - nitrogen sensitivity	Oryzabase
	*= values from N-responsive transcriptome data; **= values from N-responsive transcriptome data

## Sheet: Table S3
	Supplementary Table S3 : GO based functional annotation of 1,064 NUE- related DEGs (p value≤0.05) by Expath 2.0
	S.N	GO ID	GO term	GO category	Hit number(Query)	Percentage in query	p-value	False discovery rate
	1	GO:0006355	regulation of transcription, DNA-templated	Biological process	159	16.16	1.68e-20	7.83e-18
	2	GO:0055114	oxidation-reduction process	Biological process	124	12.6	0.01	0.05
	3	GO:0016310	phosphorylation	Biological process	75	7.62	0.00162	0.02
	4	GO:0055085	transmembrane transport	Biological process	74	7.52	0.000429	0.00597
	5	GO:0007275	multicellular organismal development	Biological process	51	5.18	1.09e-18	3.4e-16
	6	GO:0009908	flower development	Biological process	35	3.56	6.67e-22	6.22e-19
	7	GO:0045944	positive regulation of transcription from RNA polymerase II promoter	Biological process	27	2.74	1.13e-08	9.56e-07
	8	GO:0006811	ion transport	Biological process	27	2.74	6.05e-05	0.0012
	9	GO:0045893	positive regulation of transcription, DNA-templated	Biological process	25	2.54	2.18e-08	1.56e-06
	10	GO:0008152	metabolic process	Biological process	25	2.54	0.03	0.1
	11	GO:0030154	cell differentiation	Biological process	24	2.44	4.63e-08	3.08e-06
	12	GO:0015979	photosynthesis	Biological process	21	2.13	1.89e-05	0.000502
	13	GO:0009734	auxin-activated signaling pathway	Biological process	19	1.93	4.95e-06	0.000192
	14	GO:0040008	regulation of growth	Biological process	18	1.83	1.25e-12	1.66e-10
	15	GO:0009416	response to light stimulus	Biological process	16	1.63	1.52e-07	8.35e-06
	16	GO:0009733	response to auxin	Biological process	16	1.63	0.000109	0.00197
	17	GO:0019252	starch biosynthetic process	Biological process	15	1.52	5.19e-11	6.05e-09
	18	GO:0009409	response to cold	Biological process	14	1.42	0.000214	0.00351
	19	GO:0009738	abscisic acid-activated signaling pathway	Biological process	14	1.42	0.00146	0.02
	20	GO:0009058	biosynthetic process	Biological process	14	1.42	0.02	0.07
	21	GO:0015995	chlorophyll biosynthetic process	Biological process	13	1.32	5.5e-09	5.13e-07
	22	GO:0009611	response to wounding	Biological process	13	1.32	2.81e-06	0.000119
	23	GO:0009414	response to water deprivation	Biological process	13	1.32	0.00108	0.01
	24	GO:0030001	metal ion transport	Biological process	13	1.32	0.0071	0.04
	25	GO:0009742	brassinosteroid mediated signaling pathway	Biological process	11	1.12	8.4e-06	0.00028
	26	GO:0055072	iron ion homeostasis	Biological process	11	1.12	6.04e-05	0.0012
	27	GO:0009737	response to abscisic acid	Biological process	11	1.12	0.01	0.06
	28	GO:0000160	phosphorelay signal transduction system	Biological process	10	1.02	0.00746	0.04
	29	GO:0005985	sucrose metabolic process	Biological process	9	0.91	1.36e-07	7.93e-06
	30	GO:0048366	leaf development	Biological process	9	0.91	0.000114	0.00197
	31	GO:0009909	regulation of flower development	Biological process	9	0.91	0.000405	0.00589
	32	GO:0006812	cation transport	Biological process	9	0.91	0.01	0.06
	33	GO:0008643	carbohydrate transport	Biological process	9	0.91	0.01	0.06
	34	GO:2000022	regulation of jasmonic acid mediated signaling pathway	Biological process	8	0.81	1.43e-05	0.000417
	35	GO:0009555	pollen development	Biological process	8	0.81	0.01	0.06
	36	GO:0071805	potassium ion transmembrane transport	Biological process	8	0.81	0.02	0.08
	37	GO:0005978	glycogen biosynthetic process	Biological process	7	0.71	7.33e-06	0.000253
	38	GO:0016049	cell growth	Biological process	7	0.71	1.15e-05	0.000346
	39	GO:0010215	cellulose microfibril organization	Biological process	7	0.71	1.15e-05	0.000346
	40	GO:1901002	positive regulation of response to salt stress	Biological process	7	0.71	1.75e-05	0.000479
	41	GO:0048316	seed development	Biological process	7	0.71	2.57e-05	0.000616
	42	GO:0031347	regulation of defense response	Biological process	7	0.71	5.21e-05	0.00108
	43	GO:0031408	oxylipin biosynthetic process	Biological process	7	0.71	0.0023	0.02
	44	GO:0071577	zinc ion transmembrane transport	Biological process	7	0.71	0.0031	0.02
	45	GO:0010268	brassinosteroid homeostasis	Biological process	7	0.71	0.00466	0.03
	46	GO:0009664	plant-type cell wall organization	Biological process	7	0.71	0.02	0.07
	47	GO:0016125	sterol metabolic process	Biological process	7	0.71	0.03	0.1
	48	GO:0048579	negative regulation of long-day photoperiodism, flowering	Biological process	6	0.61	2.15e-06	9.53e-05
	49	GO:0048511	rhythmic process	Biological process	6	0.61	4.53e-06	0.000184
	50	GO:0009741	response to brassinosteroid	Biological process	6	0.61	1.55e-05	0.000437
	51	GO:0009832	plant-type cell wall biogenesis	Biological process	6	0.61	0.000262	0.00414
	52	GO:0009826	unidimensional cell growth	Biological process	6	0.61	0.000771	0.00971
	53	GO:0009686	gibberellin biosynthetic process	Biological process	6	0.61	0.000974	0.01
	54	GO:0048481	ovule development	Biological process	6	0.61	0.00121	0.01
	55	GO:0071421	manganese ion transmembrane transport	Biological process	6	0.61	0.00183	0.02
	56	GO:0018298	protein-chromophore linkage	Biological process	6	0.61	0.00266	0.02
	57	GO:0009585	red, far-red light phototransduction	Biological process	5	0.51	2.71e-05	0.000616
	58	GO:0050896	response to stimulus	Biological process	5	0.51	2.71e-05	0.000616
	59	GO:0010039	response to iron ion	Biological process	5	0.51	5.2e-05	0.00108
	60	GO:0045487	gibberellin catabolic process	Biological process	5	0.51	9.16e-05	0.00174
	61	GO:0006829	zinc ion transport	Biological process	5	0.51	0.000507	0.00695
	62	GO:0042128	nitrate assimilation	Biological process	5	0.51	0.000708	0.00904
	63	GO:0009630	gravitropism	Biological process	5	0.51	0.00128	0.01
	64	GO:0016117	carotenoid biosynthetic process	Biological process	5	0.51	0.00214	0.02
	65	GO:0070574	cadmium ion transmembrane transport	Biological process	5	0.51	0.00413	0.03
	66	GO:0010252	auxin homeostasis	Biological process	5	0.51	0.00501	0.03
	67	GO:0009926	auxin polar transport	Biological process	5	0.51	0.02	0.07
	68	GO:0007623	circadian rhythm	Biological process	5	0.51	0.02	0.08
	69	GO:0010158	abaxial cell fate specification	Biological process	4	0.41	0.000317	0.00476
	70	GO:0009911	positive regulation of flower development	Biological process	4	0.41	0.000548	0.0071
	71	GO:0010582	floral meristem determinacy	Biological process	4	0.41	0.000548	0.0071
	72	GO:0015770	sucrose transport	Biological process	4	0.41	0.000548	0.0071
	73	GO:0045165	cell fate commitment	Biological process	4	0.41	0.000879	0.01
	74	GO:0009690	cytokinin metabolic process	Biological process	4	0.41	0.00133	0.01
	75	GO:0015996	chlorophyll catabolic process	Biological process	4	0.41	0.00133	0.01
	76	GO:0052324	plant-type cell wall cellulose biosynthetic process	Biological process	4	0.41	0.00133	0.01
	77	GO:0048586	regulation of long-day photoperiodism, flowering	Biological process	4	0.41	0.00133	0.01
	78	GO:1902584	positive regulation of response to water deprivation	Biological process	4	0.41	0.00192	0.02
	79	GO:0048510	regulation of timing of transition from vegetative to reproductive phase	Biological process	4	0.41	0.00605	0.04
	80	GO:0006779	porphyrin-containing compound biosynthetic process	Biological process	4	0.41	0.00605	0.04
	81	GO:0009873	ethylene-activated signaling pathway	Biological process	4	0.41	0.00761	0.04
	82	GO:0015706	nitrate transport	Biological process	4	0.41	0.00942	0.05
	83	GO:0019953	sexual reproduction	Biological process	4	0.41	0.01	0.06
	84	GO:0009617	response to bacterium	Biological process	4	0.41	0.02	0.07
	85	GO:0009753	response to jasmonic acid	Biological process	4	0.41	0.02	0.07
	86	GO:0030422	production of siRNA involved in RNA interference	Biological process	4	0.41	0.03	0.1
	87	GO:0006817	phosphate ion transport	Biological process	4	0.41	0.03	0.1
	88	GO:0010228	vegetative to reproductive phase transition of meristem	Biological process	4	0.41	0.04	0.1
	89	GO:0006694	steroid biosynthetic process	Biological process	4	0.41	0.04	0.1
	90	GO:0098656	anion transmembrane transport	Biological process	4	0.41	0.04	0.1
	91	GO:0033214	iron assimilation by chelation and transport	Biological process	3	0.3	0.00011	0.00197
	92	GO:0010097	specification of stamen identity	Biological process	3	0.3	0.000426	0.00597
	93	GO:1990641	response to iron ion starvation	Biological process	3	0.3	0.00103	0.01
	94	GO:0060548	negative regulation of cell death	Biological process	3	0.3	0.00198	0.02
	95	GO:0005977	glycogen metabolic process	Biological process	3	0.3	0.00198	0.02
	96	GO:0009944	polarity specification of adaxial/abaxial axis	Biological process	3	0.3	0.00198	0.02
	97	GO:0010093	specification of floral organ identity	Biological process	3	0.3	0.00198	0.02
	98	GO:0006527	arginine catabolic process	Biological process	3	0.3	0.00198	0.02
	99	GO:0048833	specification of floral organ number	Biological process	3	0.3	0.00198	0.02
	100	GO:0016131	brassinosteroid metabolic process	Biological process	3	0.3	0.00334	0.02
	101	GO:0009789	positive regulation of abscisic acid-activated signaling pathway	Biological process	3	0.3	0.00334	0.02
	102	GO:2000012	regulation of auxin polar transport	Biological process	3	0.3	0.00515	0.03
	103	GO:0010154	fruit development	Biological process	3	0.3	0.00746	0.04
	104	GO:0072659	protein localization to plasma membrane	Biological process	3	0.3	0.01	0.05
	105	GO:0006542	glutamine biosynthetic process	Biological process	3	0.3	0.01	0.05
	106	GO:0080113	regulation of seed growth	Biological process	3	0.3	0.01	0.05
	107	GO:2000032	regulation of secondary shoot formation	Biological process	3	0.3	0.01	0.05
	108	GO:0034765	regulation of ion transmembrane transport	Biological process	3	0.3	0.01	0.06
	109	GO:0006782	protoporphyrinogen IX biosynthetic process	Biological process	3	0.3	0.01	0.06
	110	GO:0006880	intracellular sequestering of iron ion	Biological process	3	0.3	0.01	0.06
	111	GO:0009685	gibberellin metabolic process	Biological process	3	0.3	0.02	0.07
	112	GO:0010315	auxin efflux	Biological process	3	0.3	0.02	0.09
	113	GO:0010584	pollen exine formation	Biological process	3	0.3	0.03	0.1
	114	GO:0010229	inflorescence development	Biological process	3	0.3	0.04	0.1
	115	GO:0030388	fructose 1,6-bisphosphate metabolic process	Biological process	3	0.3	0.04	0.1
	116	GO:0051188	cofactor biosynthetic process	Biological process	2	0.2	0.0023	0.02
	117	GO:0090229	negative regulation of red or far-red light signaling pathway	Biological process	2	0.2	0.0023	0.02
	118	GO:0009413	response to flooding	Biological process	2	0.2	0.0023	0.02
	119	GO:0010375	stomatal complex patterning	Biological process	2	0.2	0.0023	0.02
	120	GO:0042948	salicin transport	Biological process	2	0.2	0.0023	0.02
	121	GO:0045038	protein import into chloroplast thylakoid membrane	Biological process	2	0.2	0.0023	0.02
	122	GO:0070981	L-asparagine biosynthetic process	Biological process	2	0.2	0.0023	0.02
	123	GO:0033345	asparagine catabolic process via L-aspartate	Biological process	2	0.2	0.0023	0.02
	124	GO:0048577	negative regulation of short-day photoperiodism, flowering	Biological process	2	0.2	0.0023	0.02
	125	GO:0050891	multicellular organismal water homeostasis	Biological process	2	0.2	0.0023	0.02
	126	GO:1900459	positive regulation of brassinosteroid mediated signaling pathway	Biological process	2	0.2	0.0023	0.02
	127	GO:0048657	anther wall tapetum cell differentiation	Biological process	2	0.2	0.00669	0.04
	128	GO:0001578	microtubule bundle formation	Biological process	2	0.2	0.00669	0.04
	129	GO:0010024	phytochromobilin biosynthetic process	Biological process	2	0.2	0.00669	0.04
	130	GO:0071277	cellular response to calcium ion	Biological process	2	0.2	0.00669	0.04
	131	GO:0015768	maltose transport	Biological process	2	0.2	0.00669	0.04
	132	GO:1902183	regulation of shoot apical meristem development	Biological process	2	0.2	0.00669	0.04
	133	GO:0010476	gibberellin mediated signaling pathway	Biological process	2	0.2	0.00669	0.04
	134	GO:0010336	gibberellic acid homeostasis	Biological process	2	0.2	0.00669	0.04
	135	GO:0009616	virus induced gene silencing	Biological process	2	0.2	0.01	0.06
	136	GO:0009647	skotomorphogenesis	Biological process	2	0.2	0.01	0.06
	137	GO:0009729	detection of brassinosteroid stimulus	Biological process	2	0.2	0.01	0.06
	138	GO:0048576	positive regulation of short-day photoperiodism, flowering	Biological process	2	0.2	0.01	0.06
	139	GO:0032324	molybdopterin cofactor biosynthetic process	Biological process	2	0.2	0.01	0.06
	140	GO:0048830	adventitious root development	Biological process	2	0.2	0.01	0.06
	141	GO:2000652	regulation of secondary cell wall biogenesis	Biological process	2	0.2	0.01	0.06
	142	GO:0010929	positive regulation of auxin mediated signaling pathway	Biological process	2	0.2	0.01	0.06
	143	GO:0043067	regulation of programmed cell death	Biological process	2	0.2	0.01	0.06
	144	GO:0045143	homologous chromosome segregation	Biological process	2	0.2	0.01	0.06
	145	GO:0000706	meiotic DNA double-strand break processing	Biological process	2	0.2	0.01	0.06
	146	GO:0006529	asparagine biosynthetic process	Biological process	2	0.2	0.01	0.06
	147	GO:0009584	detection of visible light	Biological process	2	0.2	0.01	0.06
	148	GO:0017006	protein-tetrapyrrole linkage	Biological process	2	0.2	0.01	0.06
	149	GO:0016540	protein autoprocessing	Biological process	2	0.2	0.01	0.06
	150	GO:0009446	putrescine biosynthetic process	Biological process	2	0.2	0.01	0.06
	151	GO:0090333	regulation of stomatal closure	Biological process	2	0.2	0.01	0.06
	152	GO:0006659	phosphatidylserine biosynthetic process	Biological process	2	0.2	0.02	0.08
	153	GO:0010187	negative regulation of seed germination	Biological process	2	0.2	0.02	0.08
	154	GO:0010581	regulation of starch biosynthetic process	Biological process	2	0.2	0.02	0.08
	155	GO:0051607	defense response to virus	Biological process	2	0.2	0.02	0.08
	156	GO:0009649	entrainment of circadian clock	Biological process	2	0.2	0.02	0.08
	157	GO:0000737	DNA catabolic process, endonucleolytic	Biological process	2	0.2	0.02	0.08
	158	GO:0006097	glyoxylate cycle	Biological process	2	0.2	0.02	0.08
	159	GO:0016577	histone demethylation	Biological process	2	0.2	0.02	0.08
	160	GO:0006349	regulation of gene expression by genetic imprinting	Biological process	2	0.2	0.02	0.08
	161	GO:0006220	pyrimidine nucleotide metabolic process	Biological process	2	0.2	0.02	0.08
	162	GO:0080038	positive regulation of cytokinin-activated signaling pathway	Biological process	2	0.2	0.02	0.08
	163	GO:0006556	S-adenosylmethionine biosynthetic process	Biological process	2	0.2	0.03	0.1
	164	GO:0048440	carpel development	Biological process	2	0.2	0.03	0.1
	165	GO:0006537	glutamate biosynthetic process	Biological process	2	0.2	0.03	0.1
	166	GO:0006353	DNA-templated transcription, termination	Biological process	2	0.2	0.03	0.1
	167	GO:0010037	response to carbon dioxide	Biological process	2	0.2	0.03	0.1
	168	GO:0051707	response to other organism	Biological process	2	0.2	0.03	0.1
	169	GO:0090332	stomatal closure	Biological process	2	0.2	0.03	0.1
	170	GO:0034721	histone H3-K4 demethylation, trimethyl-H3-K4-specific	Biological process	2	0.2	0.03	0.1
	171	GO:0010021	amylopectin biosynthetic process	Biological process	2	0.2	0.03	0.1
	172	GO:0005982	starch metabolic process	Biological process	2	0.2	0.03	0.1
	173	GO:0048509	regulation of meristem development	Biological process	2	0.2	0.04	0.1
	174	GO:0009938	negative regulation of gibberellic acid mediated signaling pathway	Biological process	2	0.2	0.04	0.1
	175	GO:2000377	regulation of reactive oxygen species metabolic process	Biological process	2	0.2	0.04	0.1
	176	GO:0055129	L-proline biosynthetic process	Biological process	2	0.2	0.04	0.1
	177	GO:0006011	UDP-glucose metabolic process	Biological process	2	0.2	0.04	0.1
	178	GO:0070933	histone H4 deacetylation	Biological process	2	0.2	0.04	0.1
	179	GO:0010118	stomatal movement	Biological process	2	0.2	0.04	0.1
	180	GO:0006469	negative regulation of protein kinase activity	Biological process	2	0.2	0.04	0.1
	181	GO:0055075	potassium ion homeostasis	Biological process	2	0.2	0.04	0.1
	182	GO:0010731	protein glutathionylation	Biological process	2	0.2	0.04	0.1
	183	GO:0051604	protein maturation	Biological process	2	0.2	0.04	0.1
	184	GO:0006538	glutamate catabolic process	Biological process	2	0.2	0.04	0.1
	185	GO:0051026	chiasma assembly	Biological process	2	0.2	0.04	0.1
	186	GO:0010431	seed maturation	Biological process	2	0.2	0.04	0.1
	187	GO:0009956	radial pattern formation	Biological process	2	0.2	0.04	0.1
	188	GO:0010014	meristem initiation	Biological process	2	0.2	0.04	0.1
	189	GO:0005634	nucleus	Cellular component	317	32.22	5.6e-13	8.71e-11
	190	GO:0009536	plastid	Cellular component	60	6.1	1.07e-10	1.11e-08
	191	GO:0009501	amyloplast	Cellular component	10	1.02	3.7e-07	1.82e-05
	192	GO:0031225	anchored component of membrane	Cellular component	7	0.71	9.71e-05	0.00181
	193	GO:0009507	chloroplast	Cellular component	90	9.15	0.000135	0.00229
	194	GO:0016604	nuclear body	Cellular component	3	0.3	0.000426	0.00597
	195	GO:0005618	cell wall	Cellular component	22	2.24	0.00113	0.01
	196	GO:0098807	chloroplast thylakoid membrane protein complex	Cellular component	3	0.3	0.00198	0.02
	197	GO:0010287	plastoglobule	Cellular component	7	0.71	0.00466	0.03
	198	GO:0009579	thylakoid	Cellular component	15	1.52	0.0051	0.03
	199	GO:0009514	glyoxysome	Cellular component	3	0.3	0.00746	0.04
	200	GO:0031969	chloroplast membrane	Cellular component	6	0.61	0.00783	0.04
	201	GO:0009570	chloroplast stroma	Cellular component	26	2.64	0.01	0.05
	202	GO:0005886	plasma membrane	Cellular component	115	11.69	0.01	0.06
	203	GO:0048226	Casparian strip	Cellular component	2	0.2	0.01	0.06
	204	GO:0000118	histone deacetylase complex	Cellular component	3	0.3	0.01	0.06
	205	GO:0005871	kinesin complex	Cellular component	4	0.41	0.02	0.09
	206	GO:0070822	Sin3-type complex	Cellular component	2	0.2	0.03	0.1
	207	GO:0003677	DNA binding	Molecular function	165	16.77	1.3e-15	3.03e-13
	208	GO:0003700	sequence-specific DNA binding transcription factor activity	Molecular function	99	10.06	1.47e-13	2.75e-11
	209	GO:0043565	sequence-specific DNA binding	Molecular function	69	7.01	1.37e-08	1.06e-06
	210	GO:0000977	RNA polymerase II regulatory region sequence-specific DNA binding	Molecular function	21	2.13	5.31e-08	3.3e-06
	211	GO:0046983	protein dimerization activity	Molecular function	39	3.96	1.65e-07	8.56e-06
	212	GO:0015293	symporter activity	Molecular function	11	1.12	1.08e-06	5.02e-05
	213	GO:0008134	transcription factor binding	Molecular function	15	1.52	6.22e-06	0.000232
	214	GO:0000166	nucleotide binding	Molecular function	118	11.99	6.86e-06	0.000246
	215	GO:0046872	metal ion binding	Molecular function	149	15.14	9.37e-06	0.000301
	216	GO:0000981	sequence-specific DNA binding RNA polymerase II transcription factor activity	Molecular function	11	1.12	1.97e-05	0.00051
	217	GO:0051980	iron-nicotianamine transmembrane transporter activity	Molecular function	4	0.41	2.54e-05	0.000616
	218	GO:0008878	glucose-1-phosphate adenylyltransferase activity	Molecular function	5	0.51	2.71e-05	0.000616
	219	GO:0051213	dioxygenase activity	Molecular function	21	2.13	3.05e-05	0.000677
	220	GO:0046873	metal ion transmembrane transporter activity	Molecular function	10	1.02	5.24e-05	0.00108
	221	GO:0008515	sucrose transmembrane transporter activity	Molecular function	4	0.41	7.33e-05	0.00142
	222	GO:0044212	transcription regulatory region DNA binding	Molecular function	23	2.34	0.000112	0.00197
	223	GO:0016491	oxidoreductase activity	Molecular function	105	10.67	0.000171	0.00284
	224	GO:0016874	ligase activity	Molecular function	17	1.73	0.000237	0.00381
	225	GO:0016829	lyase activity	Molecular function	25	2.54	0.000271	0.00421
	226	GO:0042802	identical protein binding	Molecular function	9	0.91	0.00029	0.00442
	227	GO:0016881	acid-amino acid ligase activity	Molecular function	5	0.51	0.000352	0.0052
	228	GO:0009011	starch synthase activity	Molecular function	4	0.41	0.000548	0.0071
	229	GO:0004373	glycogen (starch) synthase activity	Molecular function	5	0.51	0.000964	0.01
	230	GO:0016157	sucrose synthase activity	Molecular function	6	0.61	0.000974	0.01
	231	GO:0005385	zinc ion transmembrane transporter activity	Molecular function	7	0.71	0.000992	0.01
	232	GO:0047987	hydroperoxide dehydratase activity	Molecular function	3	0.3	0.00103	0.01
	233	GO:0019904	protein domain specific binding	Molecular function	6	0.61	0.0015	0.02
	234	GO:0016740	transferase activity	Molecular function	121	12.3	0.00176	0.02
	235	GO:0016301	kinase activity	Molecular function	72	7.32	0.00191	0.02
	236	GO:0004564	beta-fructofuranosidase activity	Molecular function	4	0.41	0.00192	0.02
	237	GO:0070569	uridylyltransferase activity	Molecular function	3	0.3	0.00198	0.02
	238	GO:0005364	maltose:proton symporter activity	Molecular function	2	0.2	0.0023	0.02
	239	GO:0042950	salicin transmembrane transporter activity	Molecular function	2	0.2	0.0023	0.02
	240	GO:0008798	beta-aspartyl-peptidase activity	Molecular function	2	0.2	0.0023	0.02
	241	GO:0016630	protochlorophyllide reductase activity	Molecular function	2	0.2	0.0023	0.02
	242	GO:0046905	phytoene synthase activity	Molecular function	2	0.2	0.0023	0.02
	243	GO:0042803	protein homodimerization activity	Molecular function	9	0.91	0.00269	0.02
	244	GO:0005506	iron ion binding	Molecular function	37	3.76	0.00273	0.02
	245	GO:0071949	FAD binding	Molecular function	10	1.02	0.00274	0.02
	246	GO:0016765	transferase activity, transferring alkyl or aryl (other than methyl) groups	Molecular function	6	0.61	0.00374	0.03
	247	GO:0016620	oxidoreductase activity, acting on the aldehyde or oxo group of donors, NAD or NADP as acceptor	Molecular function	7	0.71	0.00466	0.03
	248	GO:0015086	cadmium ion transmembrane transporter activity	Molecular function	5	0.51	0.00501	0.03
	249	GO:0005384	manganese ion transmembrane transporter activity	Molecular function	6	0.61	0.00512	0.03
	250	GO:0033612	receptor serine/threonine kinase binding	Molecular function	5	0.51	0.00602	0.04
	251	GO:0019139	cytokinin dehydrogenase activity	Molecular function	4	0.41	0.00605	0.04
	252	GO:0004067	asparaginase activity	Molecular function	2	0.2	0.00669	0.04
	253	GO:0033201	alpha-1,4-glucan synthase activity	Molecular function	2	0.2	0.00669	0.04
	254	GO:0005244	voltage-gated ion channel activity	Molecular function	3	0.3	0.00746	0.04
	255	GO:0045543	gibberellin 2-beta-dioxygenase activity	Molecular function	3	0.3	0.00746	0.04
	256	GO:0008506	sucrose:proton symporter activity	Molecular function	3	0.3	0.00746	0.04
	257	GO:0009881	photoreceptor activity	Molecular function	3	0.3	0.00746	0.04
	258	GO:0005524	ATP binding	Molecular function	166	16.87	0.0079	0.04
	259	GO:0015112	nitrate transmembrane transporter activity	Molecular function	4	0.41	0.00942	0.05
	260	GO:0016759	cellulose synthase activity	Molecular function	4	0.41	0.00942	0.05
	261	GO:0004356	glutamate-ammonia ligase activity	Molecular function	3	0.3	0.01	0.05
	262	GO:0009916	alternative oxidase activity	Molecular function	3	0.3	0.01	0.05
	263	GO:0016831	carboxy-lyase activity	Molecular function	7	0.71	0.01	0.06
	264	GO:0045550	geranylgeranyl reductase activity	Molecular function	2	0.2	0.01	0.06
	265	GO:0016628	oxidoreductase activity, acting on the CH-CH group of donors, NAD or NADP as acceptor	Molecular function	2	0.2	0.01	0.06
	266	GO:0004066	asparagine synthase (glutamine-hydrolyzing) activity	Molecular function	2	0.2	0.01	0.06
	267	GO:0016779	nucleotidyltransferase activity	Molecular function	9	0.91	0.02	0.07
	268	GO:0004497	monooxygenase activity	Molecular function	32	3.25	0.02	0.07
	269	GO:0016705	oxidoreductase activity, acting on paired donors, with incorporation or reduction of molecular oxygen	Molecular function	29	2.95	0.02	0.07
	270	GO:0005102	receptor binding	Molecular function	3	0.3	0.02	0.07
	271	GO:0019899	enzyme binding	Molecular function	2	0.2	0.02	0.08
	272	GO:0016851	magnesium chelatase activity	Molecular function	2	0.2	0.02	0.08
	273	GO:0016165	linoleate 13S-lipoxygenase activity	Molecular function	2	0.2	0.02	0.08
	274	GO:0102721	ubiquinol:oxygen oxidoreductase activity	Molecular function	2	0.2	0.02	0.08
	275	GO:0004575	sucrose alpha-glucosidase activity	Molecular function	3	0.3	0.02	0.09
	276	GO:0010329	auxin efflux transmembrane transporter activity	Molecular function	3	0.3	0.02	0.09
	277	GO:0016702	oxidoreductase activity, acting on single donors with incorporation of molecular oxygen, incorporation of two atoms of oxygen	Molecular function	7	0.71	0.02	0.09
	278	GO:0103075	indole-3-pyruvate monooxygenase activity	Molecular function	2	0.2	0.03	0.1
	279	GO:0045544	gibberellin 20-oxidase activity	Molecular function	2	0.2	0.03	0.1
	280	GO:0016767	geranylgeranyl-diphosphate geranylgeranyltransferase activity	Molecular function	2	0.2	0.03	0.1
	281	GO:0008574	plus-end-directed microtubule motor activity	Molecular function	3	0.3	0.03	0.1
	282	GO:0008429	phosphatidylethanolamine binding	Molecular function	2	0.2	0.04	0.1
	283	GO:0004324	ferredoxin-NADP+ reductase activity	Molecular function	2	0.2	0.04	0.1
	284	GO:0003983	UTP:glucose-1-phosphate uridylyltransferase activity	Molecular function	2	0.2	0.04	0.1
	285	GO:0009882	blue light photoreceptor activity	Molecular function	2	0.2	0.04	0.1
	286	GO:0080132	fatty acid alpha-hydroxylase activity	Molecular function	2	0.2	0.04	0.1
	287	GO:0032452	histone demethylase activity	Molecular function	2	0.2	0.04	0.1
	288	GO:0034647	histone demethylase activity (H3-trimethyl-K4 specific)	Molecular function	2	0.2	0.04	0.1

## Sheet: Table S4
		Supplementary Table S 4 : MapMan-based regulation overview of 1,064 NUE- related DEGs
		BinCode	BinName	Id	Type	Description	Expression value (log2FC)
		27.3	RNA.regulation of transcription	os01g0769900	Transcript	moderately similar to ( 406) AT2G34640 | Symbols: PTAC12 | PTAC12 (PLASTID TRANSCRIPTIONALLY ACTIVE12) | chr2:14582061-14584345 REVERSE protein|PTAC12, putative, expressed	4.2
		27.3.1	RNA.regulation of transcription.ABI3/VP1-related B3-domain-containing transcription factor family	os04g0581400	Transcript	weakly similar to ( 194) AT2G46870 | Symbols: NGA1 | NGA1 (NGATHA1); transcription factor | chr2:19261313-19262245 FORWARDB3 protein|B3 DNA binding domain containing protein, expressed	-1.1
		27.3.3	RNA.regulation of transcription.AP2/EREBP, APETALA2/Ethylene-responsive element binding protein family	os06g0127100	Transcript	weakly similar to ( 107) AT4G25480 | Symbols: DREB1A, CBF3, ATCBF3 | DREB1A (DEHYDRATION RESPONSE ELEMENT B1A); DNA binding / transcription activator/ transcription factor | chr4:13018353-13019003 REVERSEAP2 AP2 protein|dehydration-responsive element-binding protein, putative, expressed	-1.7
		27.3.3	RNA.regulation of transcription.AP2/EREBP, APETALA2/Ethylene-responsive element binding protein family	os01g0131600	Transcript	protein|AP2 domain containing protein, expressed	2.7
		27.3.3	RNA.regulation of transcription.AP2/EREBP, APETALA2/Ethylene-responsive element binding protein family	os01g0165000	Transcript	weakly similar to ( 124) AT2G40340 | Symbols: | AP2 domain-containing transcription factor, putative (DRE2B) | chr2:16848665-16850357 REVERSEAP2 AP2 protein|AP2 domain containing protein, expressed	1
		27.3.3	RNA.regulation of transcription.AP2/EREBP, APETALA2/Ethylene-responsive element binding protein family	os07g0669500	Transcript	weakly similar to ( 127) AT5G18560 | Symbols: PUCHI | PUCHI; DNA binding / transcription factor | chr5:6164859-6165905 REVERSEvery weakly similar to (84.3) ERF4_NICSY Ethylene-responsive transcription factor 4 (Ethylene-responsive element-binding factor 4 homolog) (EREBP-3) (NsERF3) - Nicotiana sylvestris (Wood tobacco)AP2 AP2 protein|AP2 domain containing protein, expressed	1.1
		27.3.3	RNA.regulation of transcription.AP2/EREBP, APETALA2/Ethylene-responsive element binding protein family	os02g0656600	Transcript	weakly similar to ( 131) AT2G44940 | Symbols: | AP2 domain-containing transcription factor TINY, putative | chr2:18537294-18538181 FORWARDAP2 AP2 protein|AP2 domain containing protein, expressed	2
		27.3.3	RNA.regulation of transcription.AP2/EREBP, APETALA2/Ethylene-responsive element binding protein family	os07g0617000	Transcript	weakly similar to ( 122) AT3G16770 | Symbols: RAP2.3, ATEBP, ERF72 | ATEBP (ETHYLENE-RESPONSIVE ELEMENT BINDING PROTEIN); DNA binding / protein binding / transcription activator/ transcription factor | chr3:5705784-5706768 FORWARDweakly similar to ( 122) ERF1_ORYSA Ethylene-responsive transcription factor 1 (Ethylene-responsive element-binding factor 1) (EREBP-1) (OsEREBP1) - Oryza sativa (Rice)A…	-1.3
		27.3.3	RNA.regulation of transcription.AP2/EREBP, APETALA2/Ethylene-responsive element binding protein family	os08g0408500	Transcript	weakly similar to ( 162) AT1G78080 | Symbols: RAP2.4 | RAP2.4 (related to AP2 4); DNA binding / transcription factor | chr1:29364790-29365794 FORWARDvery weakly similar to (86.3) ERF1_TOBAC Ethylene-responsive transcription factor 1 (Ethylene-responsive element-binding factor 1) (EREBP-1) (NtERF1) - Nicotiana tabacum (Common tobacco)AP2 AP2 protein|ethylene-responsive transcription factor, putati…	1.5
		27.3.3	RNA.regulation of transcription.AP2/EREBP, APETALA2/Ethylene-responsive element binding protein family	os10g0390800	Transcript	AP2 AP2 protein|AP2 domain containing protein, expressed	2.7
		27.3.3	RNA.regulation of transcription.AP2/EREBP, APETALA2/Ethylene-responsive element binding protein family	os04g0649100	Transcript	moderately similar to ( 268) AT4G36920 | Symbols: AP2, FLO2, FL1 | AP2 (APETALA 2); transcription factor | chr4:17400998-17403140 FORWARDweakly similar to ( 123) BBM1_BRANA Protein BABY BOOM 1 (BnBBM1) - Brassica napus (Rape)AP2 AP2 protein|AP2 domain containing protein, expressed	2
		27.3.3	RNA.regulation of transcription.AP2/EREBP, APETALA2/Ethylene-responsive element binding protein family	os03g0182800	Transcript	very weakly similar to (89.0) AT1G72360 | Symbols: | ethylene-responsive element-binding protein, putative | chr1:27241904-27242777 FORWARDvery weakly similar to (85.1) ERF1_ORYSA Ethylene-responsive transcription factor 1 (Ethylene-responsive element-binding factor 1) (EREBP-1) (OsEREBP1) - Oryza sativa (Rice)AP2 AP2 protein|AP2 domain containing protein, expressed	-1.2
		27.3.3	RNA.regulation of transcription.AP2/EREBP, APETALA2/Ethylene-responsive element binding protein family	os06g0604000	Transcript	weakly similar to ( 162) AT1G15360 | Symbols: SHN1, WIN1 | SHN1 (SHINE 1); DNA binding / sequence-specific DNA binding / transcription factor | chr1:5283609-5284506 FORWARDAP2 AP2 protein|AP2 domain containing protein, expressed	1.8
		27.3.3	RNA.regulation of transcription.AP2/EREBP, APETALA2/Ethylene-responsive element binding protein family	os09g0286600	Transcript	very weakly similar to (96.7) AT1G72360 | Symbols: | ethylene-responsive element-binding protein, putative | chr1:27241904-27242777 FORWARDvery weakly similar to (96.3) ERF1_ORYSA Ethylene-responsive transcription factor 1 (Ethylene-responsive element-binding factor 1) (EREBP-1) (OsEREBP1) - Oryza sativa (Rice)AP2 AP2 protein|AP2 domain containing protein, expressed	-1.5
		27.3.3	RNA.regulation of transcription.AP2/EREBP, APETALA2/Ethylene-responsive element binding protein family	os03g0183000	Transcript	very weakly similar to ( 100) AT1G72360 | Symbols: | ethylene-responsive element-binding protein, putative | chr1:27241904-27242777 FORWARDweakly similar to ( 104) ERF1_ORYSA Ethylene-responsive transcription factor 1 (Ethylene-responsive element-binding factor 1) (EREBP-1) (OsEREBP1) - Oryza sativa (Rice)AP2 AP2 protein|AP2 domain containing protein, expressed	-1.4
		27.3.3	RNA.regulation of transcription.AP2/EREBP, APETALA2/Ethylene-responsive element binding protein family	os09g0522200	Transcript	weakly similar to ( 119) AT4G25480 | Symbols: DREB1A, CBF3, ATCBF3 | DREB1A (DEHYDRATION RESPONSE ELEMENT B1A); DNA binding / transcription activator/ transcription factor | chr4:13018353-13019003 REVERSE protein|dehydration-responsive element-binding protein, putative, expressed	-2.1
		27.3.3	RNA.regulation of transcription.AP2/EREBP, APETALA2/Ethylene-responsive element binding protein family	os04g0549700	Transcript	weakly similar to ( 132) AT2G44940 | Symbols: | AP2 domain-containing transcription factor TINY, putative | chr2:18537294-18538181 FORWARDAP2 AP2 protein|AP2 domain containing protein, expressed	3.5
		27.3.3	RNA.regulation of transcription.AP2/EREBP, APETALA2/Ethylene-responsive element binding protein family	os01g0968800	Transcript	weakly similar to ( 139) AT5G51990 | Symbols: CBF4, DREB1D | CBF4 (C- REPEAT-BINDING FACTOR 4); DNA binding / transcription activator/ transcription factor | chr5:21117113-21117787 REVERSE protein|dehydration-responsive element-binding protein, putative, expressed	-1.3
		27.3.3	RNA.regulation of transcription.AP2/EREBP, APETALA2/Ethylene-responsive element binding protein family	os05g0389000	Transcript	weakly similar to ( 137) AT2G41710 | Symbols: | ovule development protein, putative | chr2:17400274-17402903 REVERSE protein|AP2 domain containing protein, expressed	3.2
		27.3.3	RNA.regulation of transcription.AP2/EREBP, APETALA2/Ethylene-responsive element binding protein family	os09g0522000	Transcript	protein|dehydration-responsive element-binding protein, putative, expressed	-5.5
		27.3.4	RNA.regulation of transcription.ARF, Auxin Response Factor family	os01g0927600	Transcript	highly similar to ( 730) AT5G62000 | Symbols: ARF2, ARF1-BP, HSS | ARF2 (AUXIN RESPONSE FACTOR 2); protein binding / transcription factor | chr5:24910859-24914680 FORWARDAuxin_resp B3 protein|auxin response factor, putative, expressed	1.1
		27.3.4	RNA.regulation of transcription.ARF, Auxin Response Factor family	os06g0685700	Transcript	highly similar to ( 693) AT4G30080 | Symbols: ARF16 | ARF16 (AUXIN RESPONSE FACTOR 16); miRNA binding / transcription factor | chr4:14703369-14705564 REVERSEAuxin_resp B3 protein|auxin response factor 18, putative, expressed	2.1
		27.3.4	RNA.regulation of transcription.ARF, Auxin Response Factor family	os11g0523800	Transcript	highly similar to ( 750) AT5G62000 | Symbols: ARF2, ARF1-BP, HSS | ARF2 (AUXIN RESPONSE FACTOR 2); protein binding / transcription factor | chr5:24910859-24914680 FORWARDAuxin_resp B3 protein|auxin response factor, putative, expressed	-1.3
		27.3.4	RNA.regulation of transcription.ARF, Auxin Response Factor family	os01g0670800	Transcript	moderately similar to ( 480) AT2G33860 | Symbols: ETT, ARF3 | ETT (ETTIN); DNA binding / transcription factor | chr2:14325444-14328613 REVERSEAuxin_resp B3 protein|auxin response factor, putative, expressed	1.9
		27.3.5	RNA.regulation of transcription.ARR	os04g0442300	Transcript	weakly similar to ( 125) AT1G59940 | Symbols: ARR3 | ARR3 (RESPONSE REGULATOR 3); transcription regulator/ two-component response regulator | chr1:22065894-22066895 REVERSEREC REC AtoC Response_reg CheY PleD protein|OsRR1 type-A response regulator, expressed	6
		27.3.6	RNA.regulation of transcription.bHLH,Basic Helix-Loop-Helix family	os01g0915600	Transcript	weakly similar to ( 178) AT3G07340 | Symbols: | basic helix-loop-helix (bHLH) family protein | chr3:2341188-2343288 REVERSE protein|BHLH transcription factor, putative, expressed	-1.1
		27.3.6	RNA.regulation of transcription.bHLH,Basic Helix-Loop-Helix family	os02g0116600	Transcript	weakly similar to ( 131) AT5G54680 | Symbols: ILR3 | ILR3 (iaa-leucine resistant3); DNA binding / transcription factor | chr5:22217270-22218993 FORWARD protein|basic helix-loop-helix DND-binding domain containing protein, expressed	1
		27.3.6	RNA.regulation of transcription.bHLH,Basic Helix-Loop-Helix family	os05g0541400	Transcript	very weakly similar to (96.7) AT3G21330 | Symbols: | basic helix-loop-helix (bHLH) family protein | chr3:7507720-7508841 FORWARD protein|bHelix-loop-helix transcription factor, putative, expressed	3.1
		27.3.6	RNA.regulation of transcription.bHLH,Basic Helix-Loop-Helix family	os02g0705500	Transcript	weakly similar to ( 125) AT4G34530 | Symbols: CIB1 | CIB1 (CRYPTOCHROME-INTERACTING BASIC-HELIX-LOOP-HELIX 1); DNA binding / transcription factor | chr4:16498466-16499946 FORWARD protein|basic helix-loop-helix, putative, expressed	1.6
		27.3.6	RNA.regulation of transcription.bHLH,Basic Helix-Loop-Helix family	os01g0952800	Transcript	weakly similar to ( 111) AT3G56970 | Symbols: BHLH038, ORG2 | BHLH038; DNA binding / transcription factor | chr3:21084204-21085094 REVERSE protein|helix-loop-helix DNA-binding domain containing protein, expressed	3.3
		27.3.6	RNA.regulation of transcription.bHLH,Basic Helix-Loop-Helix family	os09g0510500	Transcript	weakly similar to ( 126) AT5G50915 | Symbols: | basic helix-loop-helix (bHLH) family protein | chr5:20710764-20712252 REVERSE protein|BEE 1, putative, expressed	4.8
		27.3.6	RNA.regulation of transcription.bHLH,Basic Helix-Loop-Helix family	os05g0139100	Transcript	weakly similar to ( 113) AT1G09530 | Symbols: PIF3, POC1, PAP3 | PIF3 (PHYTOCHROME INTERACTING FACTOR 3); DNA binding / protein binding / transcription factor/ transcription regulator | chr1:3077216-3079367 FORWARD protein|helix-loop-helix DNA-binding domain containing protein, expressed	-1.1
		27.3.6	RNA.regulation of transcription.bHLH,Basic Helix-Loop-Helix family	os04g0301500	Transcript	weakly similar to ( 131) AT5G57150 | Symbols: | basic helix-loop-helix (bHLH) family protein | chr5:23152361-23153293 FORWARD protein|basic helix-loop-helix family protein, putative, expressed	-1.7
		27.3.6	RNA.regulation of transcription.bHLH,Basic Helix-Loop-Helix family	os02g0120500	Transcript	weakly similar to ( 173) AT2G16910 | Symbols: AMS | AMS (ABORTED MICROSPORES); DNA binding / transcription factor | chr2:7331721-7334077 FORWARD protein|helix-loop-helix DNA-binding domain containing protein, expressed	-1.4
		27.3.6	RNA.regulation of transcription.bHLH,Basic Helix-Loop-Helix family	os01g0293100	Transcript	weakly similar to ( 127) AT2G31210 | Symbols: | basic helix-loop-helix (bHLH) family protein | chr2:13296655-13298139 FORWARD protein|helix-loop-helix DNA-binding domain containing protein, expressed	1.7
		27.3.6	RNA.regulation of transcription.bHLH,Basic Helix-Loop-Helix family	os03g0782500	Transcript	weakly similar to ( 104) AT1G09530 | Symbols: PIF3, POC1, PAP3 | PIF3 (PHYTOCHROME INTERACTING FACTOR 3); DNA binding / protein binding / transcription factor/ transcription regulator | chr1:3077216-3079367 FORWARD protein|phytochrome-interacting factor 4, putative, expressed	-2.3
		27.3.6	RNA.regulation of transcription.bHLH,Basic Helix-Loop-Helix family	os02g0805250	Transcript	weakly similar to ( 115) AT4G36930 | Symbols: SPT | SPT (SPATULA); DNA binding / transcription factor | chr4:17414167-17415945 FORWARD protein|helix-loop-helix DNA-binding domain containing protein, expressed	3.6
		27.3.6	RNA.regulation of transcription.bHLH,Basic Helix-Loop-Helix family	os01g0707500	Transcript	weakly similar to ( 125) AT3G21330 | Symbols: | basic helix-loop-helix (bHLH) family protein | chr3:7507720-7508841 FORWARD protein|helix-loop-helix DNA-binding domain containing protein, expressed	2.7
		27.3.7	RNA.regulation of transcription.C2C2(Zn) CO-like, Constans-like zinc finger family	os02g0731700	Transcript	weakly similar to ( 173) AT1G25440 | Symbols: | zinc finger (B-box type) family protein | chr1:8933939-8935284 REVERSE protein|CCT/B-box zinc finger protein, putative, expressed	1.5
		27.3.7	RNA.regulation of transcription.C2C2(Zn) CO-like, Constans-like zinc finger family	os03g0181100	Transcript	protein|ZIM domain containing protein, putative, expressed	-1.1
		27.3.7	RNA.regulation of transcription.C2C2(Zn) CO-like, Constans-like zinc finger family	os08g0536300	Transcript	very weakly similar to (94.4) AT2G33500 | Symbols: | zinc finger (B-box type) family protein | chr2:14188159-14190046 REVERSE protein|CCT/B-box zinc finger protein, putative, expressed	2.1
		27.3.7	RNA.regulation of transcription.C2C2(Zn) CO-like, Constans-like zinc finger family	os07g0667300	Transcript	weakly similar to ( 142) AT2G47890 | Symbols: | zinc finger (B-box type) family protein | chr2:19608245-19609476 FORWARD protein|CCT/B-box zinc finger protein, putative, expressed	-1.3
		27.3.7	RNA.regulation of transcription.C2C2(Zn) CO-like, Constans-like zinc finger family	os03g0180800	Transcript	protein|ZIM domain containing protein, putative, expressed	-1
		27.3.7	RNA.regulation of transcription.C2C2(Zn) CO-like, Constans-like zinc finger family	os10g0391400	Transcript	protein|ZIM domain containing protein, putative, expressed	-1.3
		27.3.7	RNA.regulation of transcription.C2C2(Zn) CO-like, Constans-like zinc finger family	os04g0395800	Transcript	protein|zinc-finger protein, putative, expressed	1.2
		27.3.7	RNA.regulation of transcription.C2C2(Zn) CO-like, Constans-like zinc finger family	os06g0264200	Transcript	weakly similar to ( 191) AT1G25440 | Symbols: | zinc finger (B-box type) family protein | chr1:8933939-8935284 REVERSE protein|CCT/B-box zinc finger protein, putative, expressed	2.4
		27.3.7	RNA.regulation of transcription.C2C2(Zn) CO-like, Constans-like zinc finger family	os03g0180900	Transcript	protein|ZIM domain containing protein, putative, expressed	-1.4
		27.3.7	RNA.regulation of transcription.C2C2(Zn) CO-like, Constans-like zinc finger family	os03g0711100	Transcript	weakly similar to ( 135) AT1G73870 | Symbols: | zinc finger (B-box type) family protein | chr1:27779214-27780522 FORWARD protein|CCT/B-box zinc finger protein, putative, expressed	2.1
		27.3.7	RNA.regulation of transcription.C2C2(Zn) CO-like, Constans-like zinc finger family	os02g0724000	Transcript	moderately similar to ( 266) AT3G07650 | Symbols: COL9 | COL9 (CONSTANS-LIKE 9); transcription factor/ zinc ion binding | chr3:2442494-2443901 FORWARD protein|CCT/B-box zinc finger protein, putative, expressed	2.8
		27.3.7	RNA.regulation of transcription.C2C2(Zn) CO-like, Constans-like zinc finger family	os07g0153000	Transcript	protein|zinc-finger protein, putative, expressed	-1.3
		27.3.7	RNA.regulation of transcription.C2C2(Zn) CO-like, Constans-like zinc finger family	os10g0392400	Transcript	protein|ZIM domain containing protein, putative, expressed	-1.5
		27.3.7	RNA.regulation of transcription.C2C2(Zn) CO-like, Constans-like zinc finger family	os03g0402800	Transcript	very weakly similar to (82.0) AT1G74950 | Symbols: JAZ2, TIFY10B | TIFY10B | chr1:28148919-28150258 REVERSE protein|ZIM domain containing protein, putative, expressed	1.2
		27.3.7	RNA.regulation of transcription.C2C2(Zn) CO-like, Constans-like zinc finger family	os05g0204600	Transcript	weakly similar to ( 140) AT1G78600 | Symbols: LZF1, STH3 | LZF1 (LIGHT-REGULATED ZINC FINGER PROTEIN 1); transcription factor/ zinc ion binding | chr1:29567370-29568662 FORWARD protein|B-box zinc finger family protein, putative, expressed	-3.5
		27.3.8	RNA.regulation of transcription.C2C2(Zn) DOF zinc finger family	os03g0764900	Transcript	weakly similar to ( 110) AT5G60850 | Symbols: OBP4 | OBP4; DNA binding / transcription factor | chr5:24480578-24481501 FORWARDvery weakly similar to (95.5) PBF_MAIZE Dof zinc finger protein PBF (Prolamin box-binding factor) - Zea mays (Maize)zf-Dof protein|dof zinc finger domain containing protein, putative, expressed	-3.6
		27.3.8	RNA.regulation of transcription.C2C2(Zn) DOF zinc finger family	os01g0264000	Transcript	moderately similar to ( 203) AT5G39660 | Symbols: CDF2 | CDF2 (CYCLING DOF FACTOR 2); DNA binding / protein binding / transcription factor | chr5:15878920-15880712 FORWARDvery weakly similar to (99.8) MNB1A_MAIZE Dof zinc finger protein MNB1A - Zea mays (Maize)zf-Dof protein|expressed protein	2.8
		27.3.8	RNA.regulation of transcription.C2C2(Zn) DOF zinc finger family	os07g0685000	Transcript	moderately similar to ( 219) AT5G39660 | Symbols: CDF2 | CDF2 (CYCLING DOF FACTOR 2); DNA binding / protein binding / transcription factor | chr5:15878920-15880712 FORWARDvery weakly similar to (93.2) PBF_MAIZE Dof zinc finger protein PBF (Prolamin box-binding factor) - Zea mays (Maize)zf-Dof protein|expressed protein	-1.1
		27.3.8	RNA.regulation of transcription.C2C2(Zn) DOF zinc finger family	os02g0252400	Transcript	weakly similar to ( 112) AT1G21340 | Symbols: | Dof-type zinc finger domain-containing protein | chr1:7476087-7476869 FORWARDweakly similar to ( 101) PBF_MAIZE Dof zinc finger protein PBF (Prolamin box-binding factor) - Zea mays (Maize)zf-Dof protein|dof zinc finger domain containing protein, putative, expressed	3.9
		27.3.8	RNA.regulation of transcription.C2C2(Zn) DOF zinc finger family	os03g0169600	Transcript	weakly similar to ( 196) AT5G39660 | Symbols: CDF2 | CDF2 (CYCLING DOF FACTOR 2); DNA binding / protein binding / transcription factor | chr5:15878920-15880712 FORWARDvery weakly similar to (97.4) MNB1A_MAIZE Dof zinc finger protein MNB1A - Zea mays (Maize)zf-Dof protein|expressed protein	-4.5
		27.3.9	RNA.regulation of transcription.C2C2(Zn) GATA transcription factor family	os05g0578900	Transcript	very weakly similar to (83.2) AT3G50870 | Symbols: MNP | MNP (MONOPOLE); transcription factor | chr3:18911112-18912369 FORWARD protein|GATA zinc finger domain containing protein, expressed	1.2
		27.3.9	RNA.regulation of transcription.C2C2(Zn) GATA transcription factor family	os11g0187200	Transcript	weakly similar to ( 101) AT4G34680 | Symbols: | GATA transcription factor 3, putative (GATA-3) | chr4:16553700-16554610 FORWARD protein|GATA zinc finger domain containing protein, expressed	2.3
		27.3.9	RNA.regulation of transcription.C2C2(Zn) GATA transcription factor family	os01g0976800	Transcript	very weakly similar to (81.3) AT5G49300 | Symbols: | zinc finger (GATA type) family protein | chr5:19984849-19985475 REVERSE protein|GATA zinc finger domain containing protein, expressed	-2
		27.3.10	RNA.regulation of transcription.C2C2(Zn) YABBY family	os02g0643200	Transcript	weakly similar to ( 129) AT2G45190 | Symbols: AFO, FIL, YAB1 | AFO (ABNORMAL FLORAL ORGANS); protein binding / transcription factor/ transcription regulator | chr2:18628450-18630552 REVERSEweakly similar to ( 101) YAB1_ORYSA Protein YABBY (OsYAB1) (Filamentous flower protein 1) - Oryza sativa (Rice)YABBY protein|YABBY domain containing protein, putative, expressed	3.3
		27.3.10	RNA.regulation of transcription.C2C2(Zn) YABBY family	os04g0536300	Transcript	weakly similar to ( 164) AT2G45190 | Symbols: AFO, FIL, YAB1 | AFO (ABNORMAL FLORAL ORGANS); protein binding / transcription factor/ transcription regulator | chr2:18628450-18630552 REVERSEvery weakly similar to (99.0) YABDL_ORYSA Protein DROOPING LEAF - Oryza sativa (Rice)YABBY protein|YABBY domain containing protein, putative, expressed	1.3
		27.3.10	RNA.regulation of transcription.C2C2(Zn) YABBY family	os07g0160100	Transcript	weakly similar to ( 141) AT1G08465 | Symbols: YAB2 | YAB2 (YABBY2); transcription factor | chr1:2676033-2679382 FORWARDmoderately similar to ( 276) YAB1_ORYSA Protein YABBY (OsYAB1) (Filamentous flower protein 1) - Oryza sativa (Rice)YABBY protein|YABBY domain containing protein, putative, expressed	3.2
		27.3.10	RNA.regulation of transcription.C2C2(Zn) YABBY family	os03g0650000	Transcript	YABBY protein|YABBY domain containing protein, putative, expressed	1.6
		27.3.11	RNA.regulation of transcription.C2H2 zinc finger family	os09g0560900	Transcript	moderately similar to ( 225) AT1G30970 | Symbols: SUF4 | SUF4 (suppressor of FRIGIDA4); DNA binding / protein heterodimerization/ protein homodimerization/ transcription factor | chr1:11040613-11043433 REVERSE protein|ZOS9-19 - C2H2 zinc finger protein, expressed	-1
		27.3.11	RNA.regulation of transcription.C2H2 zinc finger family	os06g0126000	Transcript	moderately similar to ( 338) AT5G62090 | Symbols: | FUNCTIONS IN: molecular_function unknown; INVOLVED IN: biological_process unknown; LOCATED IN: cellular_component unknown; EXPRESSED IN: 17 plant structures; EXPRESSED DURING: 10 growth stages; BEST Arabidopsis thaliana protein match is: SLK1 (SEUSS-LIKE 1); transcription regulator (TAIR:AT4G25520.1); Has 38202 Blast hits to 15459 proteins in 74…	1.5
		27.3.11	RNA.regulation of transcription.C2H2 zinc finger family	os03g0437100	Transcript	weakly similar to ( 105) AT5G04340 | Symbols: C2H2, CZF2, ZAT6 | ZAT6 (ZINC FINGER OF ARABIDOPSIS THALIANA 6); nucleic acid binding / transcription factor/ zinc ion binding | chr5:1216321-1217037 REVERSEvery weakly similar to (97.8) ZFP1_WHEAT Zinc-finger protein 1 (WZF1) - Triticum aestivum (Wheat) protein|ZOS3-11 - C2H2 zinc finger protein, expressed	-2.1
		27.3.11	RNA.regulation of transcription.C2H2 zinc finger family	os01g0195000	Transcript	moderately similar to ( 308) AT1G55110 | Symbols: AtIDD7 | AtIDD7 (Arabidopsis thaliana Indeterminate(ID)-Domain 7); nucleic acid binding / transcription factor/ zinc ion binding | chr1:20560406-20562625 REVERSE protein|ZOS1-04 - C2H2 zinc finger protein, expressed	-1
		27.3.11	RNA.regulation of transcription.C2H2 zinc finger family	os08g0554400	Transcript	moderately similar to ( 315) AT2G02080 | Symbols: AtIDD4 | AtIDD4 (Arabidopsis thaliana Indeterminate(ID)-Domain 4); transcription factor | chr2:518328-520619 REVERSE protein|ZOS8-12 - C2H2 zinc finger protein, expressed	-1.9
		27.3.11	RNA.regulation of transcription.C2H2 zinc finger family	os11g0207000	Transcript	weakly similar to ( 132) AT1G43850 | Symbols: SEU | SEU (seuss); DNA binding / protein binding / protein heterodimerization/ transcription cofactor | chr1:16617872-16621596 FORWARD protein|transcriptional corepressor SEUSS, putative, expressed	-4.8
		27.3.12	RNA.regulation of transcription.C3H zinc finger family	os01g0192000	Transcript	moderately similar to ( 241) AT2G19810 | Symbols: | zinc finger (CCCH-type) family protein | chr2:8550419-8551498 FORWARD protein|zinc finger/CCCH transcription factor, putative, expressed	4.5
		27.3.12	RNA.regulation of transcription.C3H zinc finger family	os05g0128200	Transcript	moderately similar to ( 354) AT5G58620 | Symbols: | zinc finger (CCCH-type) family protein | chr5:23693959-23695782 FORWARD protein|zinc finger family protein, putative, expressed	-1.1
		27.3.14	RNA.regulation of transcription.CCAAT box binding factor family, HAP2	os03g0411100	Transcript	weakly similar to ( 118) AT3G14020 | Symbols: NF-YA6 | NF-YA6 (NUCLEAR FACTOR Y, SUBUNIT A6); transcription factor | chr3:4642968-4644301 FORWARD CBF CBFB_NFYA protein|nuclear transcription factor Y subunit, putative, expressed	-1
		27.3.15	RNA.regulation of transcription.CCAAT box binding factor family, HAP3	os01g0834400	Transcript	weakly similar to ( 171) AT2G37060 | Symbols: NF-YB8 | NF-YB8 (NUCLEAR FACTOR Y, SUBUNIT B8); transcription factor | chr2:15576336-15577660 FORWARDmoderately similar to ( 246) NFYB2_ORYSA Nuclear transcription factor Y subunit B-2 (OsNF-YB-2) (Transcriptional activator HAP3A) - Oryza sativa (Rice) CBFD_NFYB_HMF protein|histone-like transcription factor and archaeal histone, putative, expressed	-1.1
		27.3.15	RNA.regulation of transcription.CCAAT box binding factor family, HAP3	os02g0725700	Transcript	very weakly similar to (94.0) AT5G47670 | Symbols: NF-YB6 | NF-YB6 (NUCLEAR FACTOR Y, SUBUNIT B6); transcription activator/ transcription activator binding / transcription factor | chr5:19315358-19315975 FORWARDvery weakly similar to (80.1) NFYB3_ORYSA Nuclear transcription factor Y subunit B-3 (OsNF-YB-3) (Transcriptional activator HAP3B) - Oryza sativa (Rice) protein|histone-like transcription …	1.4
		27.3.15	RNA.regulation of transcription.CCAAT box binding factor family, HAP3	os07g0606600	Transcript	weakly similar to ( 198) AT4G14540 | Symbols: NF-YB3 | NF-YB3 (NUCLEAR FACTOR Y, SUBUNIT B3); transcription factor | chr4:8344663-8345148 FORWARDweakly similar to ( 170) NFYB3_ORYSA Nuclear transcription factor Y subunit B-3 (OsNF-YB-3) (Transcriptional activator HAP3B) - Oryza sativa (Rice) CBFD_NFYB_HMF HHT1 protein|histone-like transcription factor and archaeal histone, putative, expressed	-2.8
		27.3.15	RNA.regulation of transcription.CCAAT box binding factor family, HAP3	os03g0413000	Transcript	weakly similar to ( 194) AT4G14540 | Symbols: NF-YB3 | NF-YB3 (NUCLEAR FACTOR Y, SUBUNIT B3); transcription factor | chr4:8344663-8345148 FORWARDweakly similar to ( 170) NFYB3_ORYSA Nuclear transcription factor Y subunit B-3 (OsNF-YB-3) (Transcriptional activator HAP3B) - Oryza sativa (Rice) CBFD_NFYB_HMF HHT1 protein|histone-like transcription factor and archaeal histone, putative, expressed	-1.3
		27.3.16	RNA.regulation of transcription.CCAAT box binding factor family, HAP5	os05g0494100	Transcript	weakly similar to ( 151) AT3G12480 | Symbols: NF-YC11 | NF-YC11 (NUCLEAR FACTOR Y, SUBUNIT C11); DNA binding / transcription factor | chr3:3958065-3960278 FORWARD BUR6 protein|histone-like transcription factor and archaeal histone, putative, expressed	1.9
		27.3.16	RNA.regulation of transcription.CCAAT box binding factor family, HAP5	os03g0251350	Transcript	weakly similar to ( 185) AT5G63470 | Symbols: NF-YC4 | NF-YC4 (NUCLEAR FACTOR Y, SUBUNIT C4); DNA binding / transcription factor | chr5:25416332-25417084 REVERSE HAP5 protein|core histone H2A/H2B/H3/H4, putative, expressed	1.3
		27.3.16	RNA.regulation of transcription.CCAAT box binding factor family, HAP5	os06g0667100	Transcript	weakly similar to ( 192) AT1G56170 | Symbols: HAP5B, ATHAP5B, NF-YC2 | NF-YC2 (NUCLEAR FACTOR Y, SUBUNIT C2); DNA binding / transcription activator/ transcription factor | chr1:21025118-21025717 FORWARD HAP5 protein|core histone H2A/H2B/H3/H4, putative, expressed	-1
		27.3.20	RNA.regulation of transcription.G2-like transcription factor family, GARP	os06g0670300	Transcript	very weakly similar to (99.0) AT2G02060 | Symbols: | transcription factor | chr2:495691-497609 FORWARD protein|MYB family transcription factor, putative, expressed	1
		27.3.20	RNA.regulation of transcription.G2-like transcription factor family, GARP	os02g0139000	Transcript	weakly similar to ( 187) AT3G13040 | Symbols: | myb family transcription factor | chr3:4172415-4174456 REVERSE protein|Myb-like DNA-binding domain containing protein, putative, expressed	-1.3
		27.3.20	RNA.regulation of transcription.G2-like transcription factor family, GARP	os01g0971800	Transcript	weakly similar to ( 146) AT3G46640 | Symbols: PCL1 | PCL1 (PHYTOCLOCK 1); DNA binding / transcription factor | chr3:17183248-17184219 FORWARD protein|MYB family transcription factor, putative, expressed	3.9
		27.3.20	RNA.regulation of transcription.G2-like transcription factor family, GARP	os03g0329900	Transcript	weakly similar to ( 188) AT4G28610 | Symbols: PHR1, AtPHR1 | PHR1 (PHOSPHATE STARVATION RESPONSE 1); transcription factor | chr4:14133164-14134951 REVERSE protein|myb-like DNA-binding domain containing protein, expressed	-1.9
		27.3.20	RNA.regulation of transcription.G2-like transcription factor family, GARP	os09g0299200	Transcript	moderately similar to ( 217) AT2G01060 | Symbols: | myb family transcription factor | chr2:73456-74902 REVERSE protein|Myb-like DNA-binding domain containing protein, putative, expressed	-2.4
		27.3.20	RNA.regulation of transcription.G2-like transcription factor family, GARP	os04g0665600	Transcript	weakly similar to ( 126) AT5G06800 | Symbols: | myb family transcription factor | chr5:2103374-2105680 FORWARD protein|Myb-like DNA-binding domain containing protein, putative, expressed	2.2
		27.3.21	RNA.regulation of transcription.GRAS transcription factor family	os06g0127800	Transcript	moderately similar to ( 344) AT1G63100 | Symbols: | scarecrow transcription factor family protein | chr1:23399391-23401367 REVERSEweakly similar to ( 150) GAI1_VITVI DELLA protein GAI1 (Gibberellic acid-insensitive mutant protein 1) (VvGAI1) - Vitis vinifera (Grape)GRAS protein|DELLA protein SLR1, putative, expressed	3.2
		27.3.21	RNA.regulation of transcription.GRAS transcription factor family	os07g0586900	Transcript	moderately similar to ( 412) AT4G37650 | Symbols: SHR, SGR7 | SHR (SHORT ROOT); protein binding / sequence-specific DNA binding / transcription factor | chr4:17691871-17693466 FORWARDweakly similar to ( 144) CIGR2_ORYSA Chitin-inducible gibberellin-responsive protein 2 - Oryza sativa (Rice)GRAS protein|SHR, putative, expressed	-1
		27.3.21	RNA.regulation of transcription.GRAS transcription factor family	os01g0646300	Transcript	moderately similar to ( 350) AT1G14920 | Symbols: GAI, RGA2 | GAI (GIBBERELLIC ACID INSENSITIVE); transcription factor | chr1:5149414-5151015 FORWARDmoderately similar to ( 338) RGA2_BRACM DELLA protein RGA2 (RGA-like protein 2) (BrRGA2) - Brassica campestris (Field mustard)GRAS protein|GRAS family transcription factor domain containing protein, expressed	1.1
		27.3.22	RNA.regulation of transcription.HB,Homeobox transcription factor family	os07g0129700	Transcript	moderately similar to ( 280) AT4G08150 | Symbols: KNAT1, BP, BP1 | KNAT1 (KNOTTED-LIKE FROM ARABIDOPSIS THALIANA); transcription factor | chr4:5147969-5150610 REVERSEmoderately similar to ( 382) RSH1_MAIZE Homeobox protein rough sheath 1 - Zea mays (Maize) KNOX2 protein|Homeobox domain containing protein, expressed	2.3
		27.3.22	RNA.regulation of transcription.HB,Homeobox transcription factor family	os04g0569100	Transcript	highly similar to ( 639) AT4G00730 | Symbols: ANL2, AHDP | ANL2 (ANTHOCYANINLESS 2); transcription factor/ transcription regulator | chr4:301071-304103 REVERSESTART START START Homeobox HOX homeodomain protein|homeobox and START domains containing protein, putative, expressed	-1.8
		27.3.22	RNA.regulation of transcription.HB,Homeobox transcription factor family	os05g0129700	Transcript	moderately similar to ( 233) AT1G23380 | Symbols: KNAT6, KNAT6L, KNAT6S | KNAT6; DNA binding / transcription activator/ transcription factor | chr1:8297499-8302492 REVERSEmoderately similar to ( 210) KNAP2_MALDO Homeobox protein knotted-1-like 2 (KNAP2) - Malus domestica (Apple) (Malus sylvestris) KNOX2 protein|homeobox protein knotted-1-like 6, putative, expressed	3.7
		27.3.22	RNA.regulation of transcription.HB,Homeobox transcription factor family	os03g0640800	Transcript	nearly identical (1283) AT2G34710 | Symbols: PHB, ATHB14, ATHB-14, PHB-1D | PHB (PHABULOSA); DNA binding / transcription factor | chr2:14639548-14643993 REVERSEMEKHLA START START START protein|START domain containing protein, expressed	-2.5
		27.3.22	RNA.regulation of transcription.HB,Homeobox transcription factor family	os09g0470500	Transcript	weakly similar to ( 127) AT2G22430 | Symbols: ATHB6 | ATHB6; DNA binding / protein binding / sequence-specific DNA binding / transcription activator/ transcription factor | chr2:9526470-9527612 REVERSE protein|homeobox associated leucine zipper, putative, expressed	-1.6
		27.3.22	RNA.regulation of transcription.HB,Homeobox transcription factor family	os01g0848400	Transcript	weakly similar to ( 191) AT2G27990 | Symbols: BLH8, PNF | BLH8 (BEL1-LIKE HOMEODOMAIN 8); DNA binding / transcription factor | chr2:11921540-11923902 REVERSE POX POX protein|homeodomain protein, putative, expressed	2.3
		27.3.22	RNA.regulation of transcription.HB,Homeobox transcription factor family	os03g0109400	Transcript	nearly identical (1162) AT5G60690 | Symbols: REV, IFL, IFL1 | REV (REVOLUTA); DNA binding / lipid binding / transcription factor | chr5:24397734-24401933 FORWARDMEKHLA START START START protein|START domain containing protein, expressed	1.2
		27.3.22	RNA.regulation of transcription.HB,Homeobox transcription factor family	os03g0680800	Transcript	moderately similar to ( 311) AT4G34610 | Symbols: BLH6 | BLH6 (BELL1-LIKE HOMEODOMAIN 6); DNA binding / transcription factor | chr4:16530546-16532498 REVERSE POX POX protein|homeodomain protein, putative, expressed	2.2
		27.3.22	RNA.regulation of transcription.HB,Homeobox transcription factor family	os05g0455200	Transcript	moderately similar to ( 216) AT5G02030 | Symbols: LSN, PNY, HB-6, BLR, RPL, BLH9, VAN | RPL (REPLUMLESS); DNA binding / sequence-specific DNA binding / transcription factor | chr5:395754-398872 FORWARD POX POX protein|homeodomain protein, putative, expressed	1.1
		27.3.22	RNA.regulation of transcription.HB,Homeobox transcription factor family	os07g0684900	Transcript	weakly similar to ( 122) AT3G03660 | Symbols: WOX11 | WOX11 (WUSCHEL related homeobox 11); DNA binding / transcription factor | chr3:889515-892162 REVERSE protein|homeobox domain containing protein, expressed	2.9
		27.3.22	RNA.regulation of transcription.HB,Homeobox transcription factor family	os01g0302500	Transcript	moderately similar to ( 234) AT1G23380 | Symbols: KNAT6, KNAT6L, KNAT6S | KNAT6; DNA binding / transcription activator/ transcription factor | chr1:8297499-8302492 REVERSEmoderately similar to ( 216) OSH1_ORYSA Homeobox protein OSH1 - Oryza sativa (Rice) KNOX2 protein|Homeobox domain containing protein, expressed	-1.2
		27.3.22	RNA.regulation of transcription.HB,Homeobox transcription factor family	os10g0561800	Transcript	weakly similar to ( 163) AT5G06710 | Symbols: HAT14 | HAT14 (HOMEOBOX FROM ARABIDOPSIS THALIANA); DNA binding / transcription factor | chr5:2069093-2070284 REVERSE HD-ZIP_N HALZ protein|homeobox associated leucine zipper, putative, expressed	-1.3
		27.3.22	RNA.regulation of transcription.HB,Homeobox transcription factor family	os03g0325600	Transcript	weakly similar to ( 113) AT5G17810 | Symbols: WOX12 | WOX12 (WUSCHEL related homeobox 12); DNA binding / transcription factor | chr5:5880576-5882602 REVERSE protein|homeobox domain containing protein, expressed	-2.1
		27.3.22	RNA.regulation of transcription.HB,Homeobox transcription factor family	os03g0123500	Transcript	moderately similar to ( 368) AT1G62990 | Symbols: KNAT7, IXR11 | KNAT7 (KNOTTED-LIKE HOMEOBOX OF ARABIDOPSIS THALIANA 7); DNA binding / transcription activator/ transcription factor | chr1:23337468-23340348 FORWARDmoderately similar to ( 360) HD1_BRANA Homeobox protein HD1 - Brassica napus (Rape) protein|homeobox protein knotted-1, putative, expressed	2.3
		27.3.22	RNA.regulation of transcription.HB,Homeobox transcription factor family	os02g0649300	Transcript	weakly similar to ( 110) AT4G40060 | Symbols: ATHB16, ATHB-16 | ATHB16 (ARABIDOPSIS THALIANA HOMEOBOX PROTEIN 16); sequence-specific DNA binding / transcription activator/ transcription factor | chr4:18571682-18572774 REVERSE protein|homeobox associated leucine zipper, putative, expressed	3.5
		27.3.23	RNA.regulation of transcription.HSF,Heat-shock transcription factor family	os09g0456800	Transcript	weakly similar to ( 160) AT4G36990 | Symbols: HSF4, HSFB1, AT-HSFB1, ATHSF4 | HSF4 (HEAT SHOCK FACTOR 4); DNA binding / transcription factor/ transcription repressor | chr4:17440660-17441706 FORWARD HSF_DNA-bind HSF HSF1 protein|CPuORF39 - conserved peptide uORF-containing transcript, expressed	-2.7
		27.3.23	RNA.regulation of transcription.HSF,Heat-shock transcription factor family	os03g0161900	Transcript	moderately similar to ( 286) AT3G22830 | Symbols: AT-HSFA6B, HSFA6B | AT-HSFA6B; DNA binding / transcription factor | chr3:8078981-8080895 FORWARD HSF_DNA-bind HSF HSF1 protein|heat stress transcription factor, putative, expressed	1.7
		27.3.24	RNA.regulation of transcription.MADS box transcription factor family	os07g0108900	Transcript	weakly similar to ( 145) MAD15_ORYSA MADS-box transcription factor 15 (OsMADS15) (Protein APETALA1-like A) (FDRMADS3) (RMADS215) - Oryza sativa (Rice) protein|OsMADS15 - MADS-box family gene with MIKCc type-box, expressed	-1.4
		27.3.24	RNA.regulation of transcription.MADS box transcription factor family	os02g0170300	Transcript	weakly similar to ( 140) AT5G23260 | Symbols: TT16, ABS | TT16 (TRANSPARENT TESTA16); transcription factor | chr5:7836442-7838340 FORWARDmoderately similar to ( 461) MAD29_ORYSA MADS-box transcription factor 29 (OsMADS29) - Oryza sativa (Rice) MADS_MEF2_like MADS MADS MADS_SRF_like SRF-TF protein|OsMADS29 - MADS-box family gene with MIKCc type-box, expressed	-1.1
		27.3.24	RNA.regulation of transcription.MADS box transcription factor family	os01g0201700	Transcript	moderately similar to ( 255) AT4G18960 | Symbols: AG | AG (AGAMOUS); DNA binding / transcription factor | chr4:10383917-10388272 FORWARDmoderately similar to ( 396) MADS3_ORYSA MADS-box transcription factor 3 (OsMADS3) (Protein AGAMOUS-like) (RMADS222) - Oryza sativa (Rice) MADS_MEF2_like MADS MADS K-box MADS_SRF_like SRF-TF protein|OsMADS3 - MADS-box family gene with MIKCc type-box, expressed	-1.9
		27.3.24	RNA.regulation of transcription.MADS box transcription factor family	os02g0579600	Transcript	moderately similar to ( 254) AT3G57230 | Symbols: AGL16 | AGL16 (AGAMOUS-LIKE 16); transcription factor | chr3:21177710-21180671 FORWARDmoderately similar to ( 431) MAD27_ORYSA MADS-box transcription factor 27 (OsMADS27) (RMADS218) - Oryza sativa (Rice) MADS_MEF2_like MADS MADS K-box MADS_SRF_like protein|OsMADS27 - MADS-box family gene with MIKCc type-box, expressed	1.8
		27.3.24	RNA.regulation of transcription.MADS box transcription factor family	os07g0605200	Transcript	moderately similar to ( 206) AT5G60910 | Symbols: AGL8, FUL | AGL8 (agamous-like 8); transcription factor | chr5:24502736-24504934 REVERSEmoderately similar to ( 403) MAD18_ORYSA MADS-box transcription factor 18 (OsMADS18) (MADS-box protein 2) (OsMADS2) (MADS-box protein 28) (OsMADS28) (FDRMADS7) - Oryza sativa (Rice) MADS_MEF2_like MADS MADS K-box MADS_SRF_like SRF-TF protein|OsMADS18 - MADS-box…	3.5
		27.3.24	RNA.regulation of transcription.MADS box transcription factor family	os03g0752800	Transcript	moderately similar to ( 207) AT1G69120 | Symbols: AP1, AGL7 | AP1 (APETALA1); DNA binding / protein binding / protein heterodimerization/ transcription activator/ transcription factor | chr1:25982576-25986102 REVERSEmoderately similar to ( 365) MAD14_ORYSA MADS-box transcription factor 14 (OsMADS14) (Protein APETALA1-like B) (Protein AGAMOUS-like 10) (FDRMADS6) (RMADS211) - Oryza sativa (Rice) MA…	1.3
		27.3.24	RNA.regulation of transcription.MADS box transcription factor family	os05g0203800	Transcript	moderately similar to ( 236) AT4G18960 | Symbols: AG | AG (AGAMOUS); DNA binding / transcription factor | chr4:10383917-10388272 FORWARDmoderately similar to ( 427) MAD58_ORYSA MADS-box transcription factor 58 (OsMADS58) - Oryza sativa (Rice) MADS_MEF2_like K-box MADS MADS MADS_SRF_like SRF-TF protein|OsMADS58 - MADS-box family gene with MIKCc type-box, expressed	-3.6
		27.3.24	RNA.regulation of transcription.MADS box transcription factor family	os08g0112700	Transcript	weakly similar to ( 181) AT1G71692 | Symbols: AGL12, XAL1 | AGL12 (AGAMOUS-LIKE 12); transcription factor | chr1:26952903-26954939 REVERSEmoderately similar to ( 420) MAD26_ORYSA MADS-box transcription factor 26 (OsMADS26) (FDRMADS3) (RMADS220) - Oryza sativa (Rice) MADS_MEF2_like MADS MADS MADS_SRF_like protein|OsMADS26 - MADS-box family gene with MIKCc type-box, expressed	1.5
		27.3.24	RNA.regulation of transcription.MADS box transcription factor family	os01g0922800	Transcript	very weakly similar to (89.4) AT3G30260 | Symbols: AGL79 | AGL79 (AGAMOUS-LIKE 79); DNA binding / transcription factor | chr3:11909119-11912880 FORWARDvery weakly similar to (88.6) MAD18_ORYSA MADS-box transcription factor 18 (OsMADS18) (MADS-box protein 2) (OsMADS2) (MADS-box protein 28) (OsMADS28) (FDRMADS7) - Oryza sativa (Rice) MADS_MEF2_like MADS MADS MADS_SRF_like protein|OsMADS65 - MADS-bo…	-1
		27.3.24	RNA.regulation of transcription.MADS box transcription factor family	os06g0217300	Transcript	very weakly similar to (99.8) AT2G22540 | Symbols: SVP, AGL22 | SVP (SHORT VEGETATIVE PHASE); transcription factor/ translation repressor, nucleic acid binding | chr2:9580417-9583603 FORWARDmoderately similar to ( 218) MAD55_ORYSA MADS-box transcription factor 55 (OsMADS55) - Oryza sativa (Rice) MADS_MEF2_like MADS MADS MADS_SRF_like protein|OsMADS55 - MADS-box family gene with MIKCc type-box, ex…	4.8
		27.3.24	RNA.regulation of transcription.MADS box transcription factor family	os02g0761000	Transcript	weakly similar to ( 183) AT2G22540 | Symbols: SVP, AGL22 | SVP (SHORT VEGETATIVE PHASE); transcription factor/ translation repressor, nucleic acid binding | chr2:9580417-9583603 FORWARDmoderately similar to ( 341) MAD22_ORYSA MADS-box transcription factor 22 (OsMADS22) - Oryza sativa (Rice) MADS_MEF2_like MADS MADS MADS_SRF_like protein|OsMADS22 - MADS-box family gene with MIKCc type-box, express…	1
		27.3.24	RNA.regulation of transcription.MADS box transcription factor family	os01g0726400	Transcript	very weakly similar to (85.1) AT5G60910 | Symbols: AGL8, FUL | AGL8 (agamous-like 8); transcription factor | chr5:24502736-24504934 REVERSEmoderately similar to ( 344) MAD32_ORYSA MADS-box transcription factor 32 (OsMADS32) - Oryza sativa (Rice) MADS_MEF2_like MADS MADS protein|OsMADS32 - MADS-box family gene with MIKCc type-box, expressed	3
		27.3.24	RNA.regulation of transcription.MADS box transcription factor family	os03g0122600	Transcript	weakly similar to ( 107) AT4G11880 | Symbols: AGL14 | AGL14 (agamous-like 14); DNA binding / transcription factor | chr4:7143512-7147108 FORWARDweakly similar to ( 112) MAD50_ORYSA MADS-box transcription factor 50 (OsMADS50) (Protein SUPPRESSOR OF CONSTANS OVEREXPRESSION 1-like) (OsSOC1) (Protein AGAMOUS-like 20) (RMADS208) - Oryza sativa (Rice) MADS_MEF2_like MADS MADS MADS_SRF_like SRF-TF prote…	1.1
		27.3.24	RNA.regulation of transcription.MADS box transcription factor family	os01g0883100	Transcript	weakly similar to ( 200) AT5G20240 | Symbols: PI | PI (PISTILLATA); DNA binding / transcription factor | chr5:6829203-6831208 FORWARDmoderately similar to ( 394) MADS2_ORYSA MADS-box transcription factor 2 (OsMADS2) (RMADS219) (NMADS1) - Oryza sativa (Rice) MADS_MEF2_like MADS MADS K-box MADS_SRF_like SRF-TF protein|OsMADS2 - MADS-box family gene with MIKCc type-box, expressed	-1
		27.3.24	RNA.regulation of transcription.MADS box transcription factor family	os02g0731200	Transcript	moderately similar to ( 228) AT3G57230 | Symbols: AGL16 | AGL16 (AGAMOUS-LIKE 16); transcription factor | chr3:21177710-21180671 FORWARDmoderately similar to ( 407) MAD57_ORYSA MADS-box transcription factor 57 (OsMADS57) - Oryza sativa (Rice) MADS_MEF2_like MADS MADS MADS_SRF_like protein|OsMADS57 - MADS-box family gene with MIKCc type-box, expressed	-1.3
		27.3.24	RNA.regulation of transcription.MADS box transcription factor family	os03g0215400	Transcript	moderately similar to ( 211) AT1G24260 | Symbols: SEP3, AGL9 | SEP3 (SEPALLATA3); DNA binding / protein binding / transcription factor | chr1:8593790-8595862 REVERSEmoderately similar to ( 427) MADS1_ORYSA MADS-box transcription factor 1 (OsMADS1) (Protein LEAFY HULL STERILE1) (Protein SEPALLATA-like) - Oryza sativa (Rice) MADS_MEF2_like MADS MADS K-box MADS_SRF_like SRF-TF protein|OsMADS1 - MADS…	-2.1
		27.3.24	RNA.regulation of transcription.MADS box transcription factor family	os05g0423400	Transcript	weakly similar to ( 183) AT5G20240 | Symbols: PI | PI (PISTILLATA); DNA binding / transcription factor | chr5:6829203-6831208 FORWARDmoderately similar to ( 308) MADS4_ORYSA MADS-box transcription factor 4 (OsMADS4) - Oryza sativa (Rice) MADS_MEF2_like MADS MADS K-box protein|OsMADS4 - MADS-box family gene with MIKCc type-box, expressed	-5.2
		27.3.24	RNA.regulation of transcription.MADS box transcription factor family	os06g0712700	Transcript	weakly similar to ( 179) AT3G54340 | Symbols: AP3, ATAP3 | AP3 (APETALA 3); DNA binding / transcription factor | chr3:20119428-20121087 REVERSEmoderately similar to ( 402) MAD16_ORYSA MADS-box transcription factor 16 (OsMADS16) (Protein SUPERWOMAN1) (Protein APETALA3-like) - Oryza sativa (Rice) MADS_MEF2_like MADS MADS K-box MADS_SRF_like SRF-TF protein|OsMADS16 - MADS-box family gene with MIKCc …	-1.8
		27.3.24	RNA.regulation of transcription.MADS box transcription factor family	os03g0186600	Transcript	weakly similar to ( 172) AT2G22540 | Symbols: SVP, AGL22 | SVP (SHORT VEGETATIVE PHASE); transcription factor/ translation repressor, nucleic acid binding | chr2:9580417-9583603 FORWARDmoderately similar to ( 325) MAD47_ORYSA MADS-box transcription factor 47 (OsMADS47) - Oryza sativa (Rice) MADS_MEF2_like MADS MADS MADS_SRF_like protein|OsMADS47 - MADS-box family gene with MIKCc type-box, express…	1
		27.3.24	RNA.regulation of transcription.MADS box transcription factor family	os09g0507200	Transcript	moderately similar to ( 249) AT1G24260 | Symbols: SEP3, AGL9 | SEP3 (SEPALLATA3); DNA binding / protein binding / transcription factor | chr1:8593790-8595862 REVERSEmoderately similar to ( 469) MADS8_ORYSA MADS-box transcription factor 8 (OsMADS8) (MADS-box protein 24) (OsMADS24) - Oryza sativa (Rice) MADS_MEF2_like MADS MADS K-box MADS_SRF_like SRF-TF protein|OsMADS8 - MADS-box family gene with …	2
		27.3.25	RNA.regulation of transcription.MYB domain transcription factor family	os04g0517100	Transcript	moderately similar to ( 228) AT3G23250 | Symbols: MYB15, ATY19, ATMYB15 | MYB15 (MYB DOMAIN PROTEIN 15); DNA binding / transcription factor | chr3:8309742-8310624 FORWARDmoderately similar to ( 390) MYB4_ORYSA Myb-related protein Myb4 (OsMyb4) (Transcription factor RLTR1) - Oryza sativa (Rice) protein|MYB family transcription factor, putative, expressed	1
		27.3.25	RNA.regulation of transcription.MYB domain transcription factor family	os08g0151300	Transcript	moderately similar to ( 257) AT1G63910 | Symbols: AtMYB103 | AtMYB103 (myb domain protein 103); DNA binding / transcription activator/ transcription factor | chr1:23719968-23721625 REVERSEweakly similar to ( 176) MYB3_HORVU Myb-related protein Hv33 - Hordeum vulgare (Barley) protein|myb-like DNA-binding domain containing protein, putative, expressed	5.5
		27.3.25	RNA.regulation of transcription.MYB domain transcription factor family	os05g0429900	Transcript	moderately similar to ( 258) AT4G09460 | Symbols: ATMYB6 | ATMYB6; DNA binding / transcription factor | chr4:5993019-5994038 FORWARDmoderately similar to ( 251) MYB38_MAIZE Myb-related protein Zm38 - Zea mays (Maize) REB1 protein|MYB family transcription factor, putative, expressed	1.2
		27.3.25	RNA.regulation of transcription.MYB domain transcription factor family	os06g0205100	Transcript	weakly similar to ( 180) AT3G13540 | Symbols: ATMYB5 | ATMYB5 (MYB DOMAIN PROTEIN 5); DNA binding / transcription factor | chr3:4420239-4421443 FORWARDmoderately similar to ( 206) MYBC_MAIZE Anthocyanin regulatory C1 protein - Zea mays (Maize) protein|MYB family transcription factor, putative, expressed	-2.6
		27.3.25	RNA.regulation of transcription.MYB domain transcription factor family	os02g0618400	Transcript	moderately similar to ( 209) AT4G13480 | Symbols: AtMYB79 | AtMYB79 (myb domain protein 79); DNA binding / transcription factor | chr4:7836675-7837653 FORWARDweakly similar to ( 160) MYBA2_ORYSA Myb-related protein MYBAS2 - Oryza sativa (Rice) protein|MYB family transcription factor, putative, expressed	-1.1
		27.3.25	RNA.regulation of transcription.MYB domain transcription factor family	os06g0637500	Transcript	weakly similar to ( 184) AT5G67300 | Symbols: ATMYBR1, ATMYB44, MYBR1 | MYBR1 (MYB DOMAIN PROTEIN R1); DNA binding / transcription factor | chr5:26854109-26855026 FORWARDweakly similar to ( 110) MYB4_ORYSA Myb-related protein Myb4 (OsMyb4) (Transcription factor RLTR1) - Oryza sativa (Rice) REB1 protein|MYB transcription factor TaMYB1, putative, expressed	1.8
		27.3.25	RNA.regulation of transcription.MYB domain transcription factor family	os01g0812000	Transcript	moderately similar to ( 252) AT5G06100 | Symbols: MYB33, ATMYB33 | MYB33 (MYB DOMAIN PROTEIN 33); DNA binding / transcription factor | chr5:1838555-1840386 FORWARDhighly similar to ( 865) GAM1_ORYSA Transcription factor GAMYB (OsGAMyb) - Oryza sativa (Rice) protein|MYB family transcription factor, putative, expressed	2.5
		27.3.26	RNA.regulation of transcription.MYB-related transcription factor family	os05g0442400	Transcript	weakly similar to ( 132) AT5G58900 | Symbols: | myb family transcription factor | chr5:23783275-23784667 REVERSE protein|MYB family transcription factor, putative, expressed	4.6
		27.3.26	RNA.regulation of transcription.MYB-related transcription factor family	os10g0562100	Transcript	weakly similar to ( 108) AT2G38090 | Symbols: | myb family transcription factor | chr2:15945278-15946775 FORWARD protein|MYB family transcription factor, putative, expressed	-2.1
		27.3.26	RNA.regulation of transcription.MYB-related transcription factor family	os01g0192300	Transcript	weakly similar to ( 154) AT5G56840 | Symbols: | DNA-binding family protein | chr5:22980789-22982152 FORWARD protein|Myb transcription factor, putative, expressed	2.9
		27.3.32	RNA.regulation of transcription.WRKY domain transcription factor family	os11g0490900	Transcript	weakly similar to ( 159) AT5G13080 | Symbols: WRKY75, ATWRKY75 | WRKY75; transcription factor | chr5:4149928-4151019 REVERSEWRKY protein|WRKY72, expressed	-1.7
		27.3.32	RNA.regulation of transcription.WRKY domain transcription factor family	os02g0462800	Transcript	weakly similar to ( 122) AT4G31550 | Symbols: WRKY11, ATWRKY11 | WRKY11; calmodulin binding / transcription factor | chr4:15290065-15291458 REVERSEWRKY protein|WRKY42, expressed	-1.3
		27.3.32	RNA.regulation of transcription.WRKY domain transcription factor family	os05g0343400	Transcript	moderately similar to ( 266) AT2G38470 | Symbols: WRKY33, ATWRKY33 | WRKY33; transcription factor | chr2:16108476-16110539 FORWARDWRKY protein|WRKY53, expressed	1.2
		27.3.32	RNA.regulation of transcription.WRKY domain transcription factor family	os05g0322900	Transcript	very weakly similar to (97.4) AT3G56400 | Symbols: WRKY70, ATWRKY70 | WRKY70; transcription factor/ transcription repressor | chr3:20909082-20910409 REVERSEWRKY protein|WRKY45, expressed	4.2
		27.3.32	RNA.regulation of transcription.WRKY domain transcription factor family	os01g0626400	Transcript	weakly similar to ( 136) AT2G47260 | Symbols: WRKY23, ATWRKY23 | WRKY23; transcription factor | chr2:19405045-19406446 REVERSEWRKY protein|WRKY11, expressed	1.6
		27.3.32	RNA.regulation of transcription.WRKY domain transcription factor family	os11g0117400	Transcript	protein|WRKY104, expressed	-1.5
		27.3.32	RNA.regulation of transcription.WRKY domain transcription factor family	os01g0826400	Transcript	moderately similar to ( 258) AT2G38470 | Symbols: WRKY33, ATWRKY33 | WRKY33; transcription factor | chr2:16108476-16110539 FORWARDWRKY protein|WRKY24, expressed	-1.3
		27.3.35	RNA.regulation of transcription.bZIP transcription factor family	os01g0859300	Transcript	weakly similar to ( 166) AT2G36270 | Symbols: ABI5, GIA1 | ABI5 (ABA INSENSITIVE 5); DNA binding / transcription activator/ transcription factor | chr2:15204980-15206571 REVERSE protein|bZIP transcription factor, putative, expressed	5.1
		27.3.35	RNA.regulation of transcription.bZIP transcription factor family	os01g0867300	Transcript	weakly similar to ( 103) AT1G03970 | Symbols: GBF4 | GBF4; DNA binding / sequence-specific DNA binding / transcription factor | chr1:1018237-1019049 FORWARD protein|bZIP transcription factor domain containing protein, expressed	1.3
		27.3.35	RNA.regulation of transcription.bZIP transcription factor family	os07g0182000	Transcript	very weakly similar to (85.5) AT3G54620 | Symbols: ATBZIP25, BZO2H4, BZIP25 | BZIP25 (BASIC LEUCINE ZIPPER 25); protein heterodimerization/ transcription factor | chr3:20218606-20220341 REVERSEvery weakly similar to (86.7) OP2_MAIZE Regulatory protein opaque-2 - Zea mays (Maize) protein|bZIP transcription factor domain containing protein, expressed	1
		27.3.35	RNA.regulation of transcription.bZIP transcription factor family	os09g0516200	Transcript	weakly similar to ( 176) AT1G06070 | Symbols: | bZIP transcription factor, putative (bZIP69) | chr1:1835201-1837116 REVERSEmoderately similar to ( 303) RF2A_ORYSA Transcription factor RF2a - Oryza sativa (Rice) protein|transcription factor RF2a, putative, expressed	-1.7
		27.3.35	RNA.regulation of transcription.bZIP transcription factor family	os01g0808100	Transcript	moderately similar to ( 375) AT3G12250 | Symbols: TGA6, BZIP45 | TGA6 (TGACG MOTIF-BINDING FACTOR 6); DNA binding / transcription factor | chr3:3906636-3908583 FORWARDhighly similar to ( 575) HBP1C_WHEAT Transcription factor HBP-1b(c1) (Fragment) - Triticum aestivum (Wheat) protein|transcription factor, putative, expressed	-3
		27.3.35	RNA.regulation of transcription.bZIP transcription factor family	os03g0336200	Transcript	weakly similar to ( 200) AT2G40620 | Symbols: | bZIP transcription factor family protein | chr2:16954804-16956872 REVERSEmoderately similar to ( 394) RF2B_ORYSA Transcription factor RF2b - Oryza sativa (Rice) protein|bZIP transcription factor family protein, putative, expressed	3.9
		27.3.35	RNA.regulation of transcription.bZIP transcription factor family	os01g0813100	Transcript	weakly similar to ( 197) AT3G56850 | Symbols: AREB3, DPBF3 | AREB3 (ABA-RESPONSIVE ELEMENT BINDING PROTEIN 3); DNA binding / transcription activator/ transcription factor | chr3:21046554-21047894 REVERSE protein|bZIP transcription factor, putative, expressed	-1.4
		27.3.35	RNA.regulation of transcription.bZIP transcription factor family	os10g0562700	Transcript	highly similar to ( 530) AT3G60320 | Symbols: | DNA binding | chr3:22292073-22295228 REVERSEDUF632 DUF630 protein|DUF630/DUF632 domains containing protein, putative, expressed	1.2
		27.3.37	RNA.regulation of transcription.AS2,Lateral Organ Boundaries Gene Family	os01g0889400	Transcript	weakly similar to ( 168) AT1G65620 | Symbols: AS2 | AS2 (ASYMMETRIC LEAVES 2); protein binding | chr1:24400146-24400745 FORWARDDUF260 protein|DUF260 domain containing protein, putative, expressed	-2.1
		27.3.37	RNA.regulation of transcription.AS2,Lateral Organ Boundaries Gene Family	os02g0820500	Transcript	weakly similar to ( 140) AT2G42430 | Symbols: LBD16, ASL18 | LBD16 (LATERAL ORGAN BOUNDARIES-DOMAIN 16) | chr2:17663668-17665153 FORWARDDUF260 protein|DUF260 domain containing protein, putative, expressed	1.1
		27.3.39	RNA.regulation of transcription.AtSR Transcription Factor family	os07g0490200	Transcript	highly similar to ( 665) AT4G16150 | Symbols: | calmodulin binding / transcription regulator | chr4:9148225-9153048 FORWARD CG-1 protein|calmodulin-binding transcription activator 5, putative, expressed	2.4
		27.3.40	RNA.regulation of transcription.Aux/IAA family	os12g0601400	Transcript	weakly similar to ( 166) AT1G04240 | Symbols: SHY2, IAA3 | SHY2 (SHORT HYPOCOTYL 2); transcription factor | chr1:1128564-1129319 REVERSEmoderately similar to ( 296) IAA31_ORYSA Auxin-responsive protein IAA31 (Indoleacetic acid-induced protein 31) - Oryza sativa (Rice)AUX_IAA protein|OsIAA31 - Auxin-responsive Aux/IAA gene family member, expressed	3.5
		27.3.40	RNA.regulation of transcription.Aux/IAA family	os01g0741900	Transcript	very weakly similar to (90.1) AT3G16500 | Symbols: PAP1, IAA26 | PAP1 (PHYTOCHROME-ASSOCIATED PROTEIN 1); transcription factor | chr3:5612801-5614208 REVERSEmoderately similar to ( 414) IAA6_ORYSA Auxin-responsive protein IAA6 (Indoleacetic acid-induced protein 6) - Oryza sativa (Rice) protein|OsIAA6 - Auxin-responsive Aux/IAA gene family member, expressed	1.1
		27.3.40	RNA.regulation of transcription.Aux/IAA family	os03g0633800	Transcript	weakly similar to ( 145) AT1G04240 | Symbols: SHY2, IAA3 | SHY2 (SHORT HYPOCOTYL 2); transcription factor | chr1:1128564-1129319 REVERSEmoderately similar to ( 329) IAA12_ORYSA Auxin-responsive protein IAA12 (Indoleacetic acid-induced protein 12) - Oryza sativa (Rice)AUX_IAA protein|OsIAA12 - Auxin-responsive Aux/IAA gene family member, expressed	3.7
		27.3.40	RNA.regulation of transcription.Aux/IAA family	os01g0178500	Transcript	weakly similar to ( 164) AT1G04250 | Symbols: AXR3, IAA17 | AXR3 (AUXIN RESISTANT 3); transcription factor | chr1:1136382-1138340 FORWARDmoderately similar to ( 265) IAA1_ORYSA Auxin-responsive protein IAA1 (Indoleacetic acid-induced protein 1) - Oryza sativa (Rice)AUX_IAA protein|OsIAA1 - Auxin-responsive Aux/IAA gene family member, expressed	-1.9
		27.3.44	RNA.regulation of transcription.Chromatin Remodeling Factors	os03g0722400	Transcript	highly similar to ( 848) AT5G66750 | Symbols: DDM1, CHR01, CHR1, CHA1, SOM4, SOM1, ATDDM1 | CHR1 (CHROMATIN REMODELING 1); ATPase/ helicase | chr5:26649050-26652869 FORWARDmoderately similar to ( 417) ISW2_ORYSA Probable chromatin remodelling complex ATPase chain (EC 3.6.1.-) (ISW2-like) (Sucrose nonfermenting protein 2 homolog) - Oryza sativa (Rice) HepA SNF2_N DEXDc HELICc DEXHc DEXDc HELICc He…	-1
		27.3.44	RNA.regulation of transcription.Chromatin Remodeling Factors	os09g0442700	Transcript	highly similar to ( 883) AT5G66750 | Symbols: DDM1, CHR01, CHR1, CHA1, SOM4, SOM1, ATDDM1 | CHR1 (CHROMATIN REMODELING 1); ATPase/ helicase | chr5:26649050-26652869 FORWARDmoderately similar to ( 417) ISW2_ORYSA Probable chromatin remodelling complex ATPase chain (EC 3.6.1.-) (ISW2-like) (Sucrose nonfermenting protein 2 homolog) - Oryza sativa (Rice) HepA SNF2_N DEXDc HELICc DEXHc DEXDc Helicase_…	2
		27.3.44	RNA.regulation of transcription.Chromatin Remodeling Factors	os07g0497100	Transcript	nearly identical (1240) AT5G44800 | Symbols: CHR4 | CHR4 (CHROMATIN REMODELING 4); ATP binding / DNA binding / chromatin binding / helicase/ nucleic acid binding / protein binding / zinc ion binding | chr5:18083659-18092162 REVERSEmoderately similar to ( 357) ISW2_ORYSA Probable chromatin remodelling complex ATPase chain (EC 3.6.1.-) (ISW2-like) (Sucrose nonfermenting protein 2 homolog) - Oryza s…	-1
		27.3.46	RNA.regulation of transcription.DNA methyltransferases	os07g0182900	Transcript	highly similar to ( 640) AT5G49160 | Symbols: MET1, MET2, METI, DDM2, DMT01, DMT1 | MET1 (METHYLTRANSFERASE 1); methyltransferase | chr5:19932501-19938186 FORWARDmoderately similar to ( 203) CMT1_MAIZE DNA (cytosine-5)-methyltransferase 1 (EC 2.1.1.37) (Chromomethylase 1) (Zea methyltransferase2) (Zmet2) (DNA cytosine methyltransferase MET2a) - Zea mays (Maize)DNA_methylase Cyt_C5_DNA_methylase D…	2.6
		27.3.46	RNA.regulation of transcription.DNA methyltransferases	os03g0110800	Transcript	highly similar to ( 531) AT5G14620 | Symbols: DRM2, DMT7 | DRM2 (DOMAINS REARRANGED METHYLTRANSFERASE 2); N-methyltransferase | chr5:4715429-4718578 REVERSE protein|DNA methyltransferase protein, putative, expressed	3.1
		27.3.47	RNA.regulation of transcription.ELF3	os01g0566100	Transcript	weakly similar to ( 127) AT2G25930 | Symbols: ELF3, PYK20 | ELF3 (EARLY FLOWERING 3); protein C-terminus binding / transcription factor | chr2:11059459-11063178 FORWARD protein|ELF3 protein, putative, expressed	-10.4
		27.3.50	RNA.regulation of transcription.General Transcription	os04g0600900	Transcript	weakly similar to ( 151) AT3G13960 | Symbols: AtGRF5 | AtGRF5 (GROWTH-REGULATING FACTOR 5); transcription activator | chr3:4608526-4610160 FORWARDWRC protein|growth-regulating factor, putative, expressed	5.2
		27.3.50	RNA.regulation of transcription.General Transcription	os02g0701300	Transcript	weakly similar to ( 149) AT3G13960 | Symbols: AtGRF5 | AtGRF5 (GROWTH-REGULATING FACTOR 5); transcription activator | chr3:4608526-4610160 FORWARDWRC protein|growth-regulating factor, putative, expressed	2.7
		27.3.55	RNA.regulation of transcription.HDA	os01g0909100	Transcript	very weakly similar to (92.4) HD2B_MAIZE Histone deacetylase 2b (HD2b) (Zm-HD2b) - Zea mays (Maize) protein|ZOS1-21 - C2H2 zinc finger protein, expressed	-2
		27.3.55	RNA.regulation of transcription.HDA	os02g0214900	Transcript	highly similar to ( 659) AT4G38130 | Symbols: HD1, ATHD1, HDA1, RPD3A, HDA19 | HD1 (HISTONE DEACETYLASE 1); basal transcription repressor/ histone deacetylase/ protein binding | chr4:17896663-17899057 REVERSEhighly similar to ( 704) HDAC_MAIZE Probable histone deacetylase (RPD3 homolog) - Zea mays (Maize) Hist_deacetyl AcuC protein|histone deacetylase, putative, expressed	1.7
		27.3.55	RNA.regulation of transcription.HDA	os05g0597100	Transcript	very weakly similar to (86.7) AT5G22650 | Symbols: HD2B, HDT02, HDT2, ATHD2B, HDA4, HD2 | HD2B (HISTONE DEACETYLASE 2B); histone deacetylase | chr5:7534120-7536054 FORWARDweakly similar to ( 173) HD2C_MAIZE Histone deacetylase 2c (HD2c) (Zm-HD2c) - Zea mays (Maize) protein|ZOS5-12 - C2H2 zinc finger protein, expressed	-2.4
		27.3.55	RNA.regulation of transcription.HDA	os02g0215200	Transcript	highly similar to ( 671) AT4G38130 | Symbols: HD1, ATHD1, HDA1, RPD3A, HDA19 | HD1 (HISTONE DEACETYLASE 1); basal transcription repressor/ histone deacetylase/ protein binding | chr4:17896663-17899057 REVERSEhighly similar to ( 728) HDAC_MAIZE Probable histone deacetylase (RPD3 homolog) - Zea mays (Maize) Hist_deacetyl AcuC protein|histone deacetylase, putative, expressed	1.1
		27.3.57	RNA.regulation of transcription.JUMONJI family	os05g0196500	Transcript	highly similar to ( 741) AT1G08620 | Symbols: | transcription factor | chr1:2737554-2743370 FORWARD JmjC JmjC FYRC zf-C5HC2 JmjN protein|transcription factor jumonji, putative, expressed	-1.1
		27.3.57	RNA.regulation of transcription.JUMONJI family	os10g0577600	Transcript	highly similar to ( 626) AT5G46910 | Symbols: | transcription factor jumonji (jmj) family protein | chr5:19047780-19050880 FORWARD JmjC protein|jmjC domain containing protein, expressed	-3.3
		27.3.65	RNA.regulation of transcription.Polycomb Group (PcG)	os06g0275500	Transcript	highly similar to ( 771) AT2G23380 | Symbols: CLF, ICU1, SDG1, SET1 | CLF (CURLY LEAF); transcription factor | chr2:9955570-9960117 FORWARDnearly identical (1210) EZ1_MAIZE Polycomb protein EZ1 (Enhancer of zeste protein 1) - Zea mays (Maize) SET SET protein|SET domain containing protein, expressed	5.3
		27.3.66	RNA.regulation of transcription.Psudo ARR transcription factor family	os03g0284100	Transcript	moderately similar to ( 350) AT5G02810 | Symbols: PRR7, APRR7 | PRR7 (PSEUDO-RESPONSE REGULATOR 7); transcription regulator/ two-component response regulator | chr5:638283-641461 REVERSEnearly identical (1212) PRR73_ORYSA Two-component response regulator-like PRR73 (Pseudo-response regulator 73) (OsPRR73) - Oryza sativa (Rice)REC REC Response_reg AtoC CheY OmpR protein|response regulator receiver…	-2.5
		27.3.66	RNA.regulation of transcription.Psudo ARR transcription factor family	os09g0532400	Transcript	moderately similar to ( 259) AT5G24470 | Symbols: APRR5, PRR5 | APRR5 (ARABIDOPSIS PSEUDO-RESPONSE REGULATOR 5); transcription regulator/ two-component response regulator | chr5:8356204-8358873 REVERSEnearly identical (1099) PRR95_ORYSA Two-component response regulator-like PRR95 (Pseudo-response regulator 95) (OsPRR95) - Oryza sativa (Rice)Response_reg REC REC AtoC CheY protein|response regulato…	3.4
		27.3.66	RNA.regulation of transcription.Psudo ARR transcription factor family	os07g0695100	Transcript	moderately similar to ( 331) AT5G02810 | Symbols: PRR7, APRR7 | PRR7 (PSEUDO-RESPONSE REGULATOR 7); transcription regulator/ two-component response regulator | chr5:638283-641461 REVERSEnearly identical (1109) PRR37_ORYSA Two-component response regulator-like PRR37 (Pseudo-response regulator 37) (OsPRR37) - Oryza sativa (Rice)REC REC Response_reg CheY AtoC OmpR PleD protein|response regulator rec…	-2.6
		27.3.66	RNA.regulation of transcription.Psudo ARR transcription factor family	os02g0618200	Transcript	moderately similar to ( 259) AT5G61380 | Symbols: TOC1, APRR1, PRR1 | TOC1 (TIMING OF CAB EXPRESSION 1); transcription regulator/ two-component response regulator | chr5:24675540-24678176 FORWARDhighly similar to ( 843) PRR1_ORYSA Two-component response regulator-like PRR1 (Pseudo-response regulator 1) (OsPRR1) - Oryza sativa (Rice) protein|response regulator receiver domain containing protein, e…	1.1
		27.3.67	RNA.regulation of transcription.putative transcription regulator	os02g0293300	Transcript	moderately similar to ( 389) AT1G15910 | Symbols: | XH/XS domain-containing protein / XS zinc finger domain-containing protein | chr1:5465951-5468723 FORWARDXH XS protein|transcription factor X1, putative, expressed	1.5
		27.3.67	RNA.regulation of transcription.putative transcription regulator	os06g0136900	Transcript	weakly similar to ( 186) AT4G22810 | Symbols: | DNA-binding protein-related | chr4:11984432-11985406 FORWARDDUF296 protein|DNA binding protein, putative, expressed	2.1
		27.3.67	RNA.regulation of transcription.putative transcription regulator	os08g0118000	Transcript	weakly similar to ( 186) AT4G12080 | Symbols: | DNA-binding family protein | chr4:7239466-7241246 FORWARDDUF296 protein|AT hook motif domain containing protein, expressed	1.2
		27.3.67	RNA.regulation of transcription.putative transcription regulator	os01g0934300	Transcript	moderately similar to ( 399) AT4G02560 | Symbols: LD | LD (luminidependens); transcription factor | chr4:1123656-1128252 REVERSE protein|homeobox domain containing protein, expressed	3.3
		27.3.67	RNA.regulation of transcription.putative transcription regulator	os05g0494100	Transcript	weakly similar to ( 151) AT3G12480 | Symbols: NF-YC11 | NF-YC11 (NUCLEAR FACTOR Y, SUBUNIT C11); DNA binding / transcription factor | chr3:3958065-3960278 FORWARD BUR6 protein|histone-like transcription factor and archaeal histone, putative, expressed	1.9
		27.3.67	RNA.regulation of transcription.putative transcription regulator	os06g0595900	Transcript	moderately similar to ( 280) AT5G11430 | Symbols: | zinc ion binding | chr5:3648469-3652256 FORWARD protein|SPOC domain containing protein, putative, expressed	2
		27.3.67	RNA.regulation of transcription.putative transcription regulator	os08g0105000	Transcript	moderately similar to ( 207) AT1G77250 | Symbols: | PHD finger family protein | chr1:29020444-29022938 REVERSE protein|PHD-finger domain containing protein, putative, expressed	6.5
		27.3.67	RNA.regulation of transcription.putative transcription regulator	os05g0125000	Transcript	highly similar to ( 832) AT5G60410 | Symbols: ATSIZ1, SIZ1 | SIZ1; DNA binding / SUMO ligase | chr5:24295226-24300792 FORWARD protein|ATSIZ1/SIZ1, putative, expressed	-3.6
		27.3.69	RNA.regulation of transcription.SET-domain transcriptional regulator family	os06g0275500	Transcript	highly similar to ( 771) AT2G23380 | Symbols: CLF, ICU1, SDG1, SET1 | CLF (CURLY LEAF); transcription factor | chr2:9955570-9960117 FORWARDnearly identical (1210) EZ1_MAIZE Polycomb protein EZ1 (Enhancer of zeste protein 1) - Zea mays (Maize) SET SET protein|SET domain containing protein, expressed	5.3
		27.3.69	RNA.regulation of transcription.SET-domain transcriptional regulator family	os02g0554000	Transcript	highly similar to ( 511) AT1G77300 | Symbols: EFS, SDG8 | EFS (EARLY FLOWERING IN SHORT DAYS); histone methyltransferase(H3-K36 specific) / histone methyltransferase(H3-K4 specific) | chr1:29040936-29048810 REVERSE SET SET protein|histone-lysine N-methyltransferase ASHH2, putative, expressed	-1.2
		27.3.80	RNA.regulation of transcription.zf-HD	os09g0466400	Transcript	weakly similar to ( 182) AT4G24660 | Symbols: ATHB22, MEE68 | ATHB22 (HOMEOBOX PROTEIN 22); DNA binding / transcription factor | chr4:12724851-12725513 REVERSEZF-HD_dimer protein|ZF-HD protein dimerisation region containing protein, expressed	-1.8
		27.3.99	RNA.regulation of transcription.unclassified	os04g0448500	Transcript	moderately similar to ( 251) AT2G03200 | Symbols: | aspartyl protease family protein | chr2:966506-967891 REVERSE protein|aspartic proteinase nepenthesin precursor, putative, expressed	-3.3
		27.3.99	RNA.regulation of transcription.unclassified	os06g0182500	Transcript	highly similar to ( 624) AT4G36860 | Symbols: | zinc ion binding | chr4:17358580-17361189 REVERSE protein|LIM domain-containing protein, putative, expressed	3.9
		27.3.99	RNA.regulation of transcription.unclassified	os09g0456100	Transcript	weakly similar to ( 162) AT1G45207 | Symbols: | remorin family protein | chr1:17130703-17133548 REVERSE protein|remorin C-terminal domain containing protein, putative, expressed	-1.1
		27.3.99	RNA.regulation of transcription.unclassified	os06g0126000	Transcript	moderately similar to ( 338) AT5G62090 | Symbols: | FUNCTIONS IN: molecular_function unknown; INVOLVED IN: biological_process unknown; LOCATED IN: cellular_component unknown; EXPRESSED IN: 17 plant structures; EXPRESSED DURING: 10 growth stages; BEST Arabidopsis thaliana protein match is: SLK1 (SEUSS-LIKE 1); transcription regulator (TAIR:AT4G25520.1); Has 38202 Blast hits to 15459 proteins in 74…	1.5
		27.3.99	RNA.regulation of transcription.unclassified	os01g0147200	Transcript	moderately similar to ( 385) AT1G32130 | Symbols: | FUNCTIONS IN: molecular_function unknown; INVOLVED IN: biological_process unknown; LOCATED IN: cellular_component unknown; EXPRESSED IN: 25 plant structures; EXPRESSED DURING: 15 growth stages; CONTAINS InterPro DOMAIN/s: TFIIS N-terminal (InterPro:IPR017923), IWS1, C-terminal (InterPro:IPR008654); BEST Arabidopsis thaliana protein match is: IWS…	2.2
		27.3.99	RNA.regulation of transcription.unclassified	os02g0819100	Transcript	moderately similar to ( 236) AT5G04270 | Symbols: | zinc ion binding | chr5:1182896-1184718 REVERSE COG5273 zf-DHHC protein|DHHC zinc finger domain containing protein, expressed	-1.3
		27.3.99	RNA.regulation of transcription.unclassified	os06g0666100	Transcript	moderately similar to ( 221) AT1G31040 | Symbols: | unknown protein | chr1:11069793-11072182 REVERSEPLATZ protein|zinc-binding protein, putative, expressed	-1.3
		27.3.99	RNA.regulation of transcription.unclassified	os03g0186900	Transcript	moderately similar to ( 301) AT1G09750 | Symbols: | chloroplast nucleoid DNA-binding protein-related | chr1:3157541-3158960 FORWARD protein|aspartic proteinase nepenthesin precursor, putative, expressed	3
		27.3.99	RNA.regulation of transcription.unclassified	os12g0420200	Transcript	highly similar to ( 600) AT1G09340 | Symbols: CRB, CSP41B | CRB (CHLOROPLAST RNA BINDING); binding / catalytic/ coenzyme binding | chr1:3015473-3018035 FORWARDWcaG Epimerase protein|3-beta hydroxysteroid dehydrogenase/isomerase family protein, putative, expressed	1.3
		27.3.99	RNA.regulation of transcription.unclassified	os11g0207000	Transcript	weakly similar to ( 132) AT1G43850 | Symbols: SEU | SEU (seuss); DNA binding / protein binding / protein heterodimerization/ transcription cofactor | chr1:16617872-16621596 FORWARD protein|transcriptional corepressor SEUSS, putative, expressed	-4.8
		27.3.99	RNA.regulation of transcription.unclassified	os08g0504700	Transcript	weakly similar to ( 108) AT3G12630 | Symbols: | zinc finger (AN1-like) family protein | chr3:4012707-4013189 FORWARDweakly similar to ( 156) ISAP1_ORYSA Multiple stress-responsive zinc-finger protein ISAP1 (Stress-associated protein 1) (OsISAP1) - Oryza sativa (Rice) protein|AN1-like zinc finger domain containing protein, expressed	1.7
		27.3.99	RNA.regulation of transcription.unclassified	os08g0159500	Transcript	very weakly similar to ( 100) AT1G32540 | Symbols: LOL1 | LOL1 (LSD ONE LIKE 1); DNA binding | chr1:11768043-11769591 FORWARD protein|LSD1 zinc finger domain containing protein, expressed	-1.1
		29.4	protein.postranslational modification	os03g0289100	Transcript	highly similar to ( 800) AT3G01090 | Symbols: AKIN10 | AKIN10 (Arabidopsis SNF1 kinase homolog 10); protein binding / protein kinase | chr3:31437-33977 REVERSEhighly similar to ( 818) RKIN1_SECCE Carbon catabolite derepressing protein kinase (EC 2.7.11.1) - Secale cereale (Rye) S_TKc S_TKc Pkinase SPS1 Pkinase_Tyr TyrKc PTKc PTKc_FAK PTKc_Srm_Brk PTKc_Jak_rpt2 PTKc_Tec_Rlk PTKc_Tec_like PTKc_PDGF…	1.4
		29.4	protein.postranslational modification	os01g0206700	Transcript	highly similar to ( 586) AT5G45820 | Symbols: CIPK20, SnRK3.6, PKS18 | CIPK20 (CBL-INTERACTING PROTEIN KINASE 20); kinase/ protein serine/threonine kinase | chr5:18587081-18588400 REVERSEmoderately similar to ( 479) CIPK1_ORYSA CIPK-like protein 1 (EC 2.7.11.1) (OsCK1) - Oryza sativa (Rice) S_TKc S_TKc Pkinase SPS1 Pkinase_Tyr TyrKc PTKc PTKc_Srm_Brk PTKc_Fes_like PTKc_Csk_like PTKc_Fes PTKc_Jak_…	2.3
		29.4	protein.postranslational modification	os02g0219400	Transcript	highly similar to ( 523) AT1G08750 | Symbols: | GPI-anchor transamidase, putative | chr1:2801283-2804392 FORWARDvery weakly similar to ( 100) VPEA_ARATH Vacuolar-processing enzyme alpha-isozyme precursor (EC 3.4.22.-) (Alpha-VPE) - Arabidopsis thaliana (Mouse-ear cress) GPI8 Peptidase_C13 protein|GPI-anchor transamidase precursor, putative, expressed	-1.2
		29.4	protein.postranslational modification	os10g0564500	Transcript	moderately similar to ( 500) AT4G33950 | Symbols: OST1, SNRK2-6, SRK2E, SNRK2.6, P44 | OST1 (OPEN STOMATA 1); calcium-dependent protein serine/threonine kinase/ kinase/ protein kinase | chr4:16272819-16274657 FORWARDhighly similar to ( 615) SAPK3_ORYSA Serine/threonine-protein kinase SAPK3 (EC 2.7.11.1) (Osmotic stress/abscisic acid-activated protein kinase 3) (Protein kinase REK) - Oryza sativa …	2
		29.4	protein.postranslational modification	os04g0584600	Transcript	highly similar to ( 675) AT2G17290 | Symbols: CPK6, ATCDPK3 | CPK6 (CALCIUM-DEPENDENT PROTEIN KINASE 6); ATP binding / calcium ion binding / calmodulin-dependent protein kinase/ kinase/ protein kinase/ protein serine/threonine kinase | chr2:7517005-7519239 FORWARDhighly similar to ( 587) CDPK3_ORYSA Calcium-dependent protein kinase, isoform 11 (EC 2.7.11.1) (CDPK 11) - Oryza sativa (Rice) S_TKc S…	1.9
		29.4	protein.postranslational modification	os09g0325700	Transcript	moderately similar to ( 300) AT2G29380 | Symbols: | protein phosphatase 2C, putative / PP2C, putative | chr2:12608855-12610124 FORWARD PP2Cc PP2Cc PP2C PTC1 protein|protein phosphatase 2C, putative, expressed	-1.3
		29.4	protein.postranslational modification	os12g0614600	Transcript	moderately similar to ( 367) AT2G34650 | Symbols: PID, ABR | PID (PINOID); kinase/ protein kinase/ protein serine/threonine kinase | chr2:14589934-14591557 REVERSEmoderately similar to ( 310) KPK1_PHAVU Protein kinase PVPK-1 (EC 2.7.11.1) - Phaseolus vulgaris (Kidney bean) (French bean) S_TKc S_TKc Pkinase SPS1 Pkinase_Tyr TyrKc PTKc PTKc_Jak_rpt2 protein|AGC_PVPK_like_kin82y.20 - ACG kinases inc…	2.1
		29.4	protein.postranslational modification	os01g0114300	Transcript	moderately similar to ( 327) AT5G38280 | Symbols: PR5K | PR5K; kinase/ transmembrane receptor protein serine/threonine kinase | chr5:15293325-15295838 REVERSEweakly similar to ( 200) KPRO_MAIZE Putative receptor protein kinase ZmPK1 precursor (EC 2.7.11.1) - Zea mays (Maize) Pkinase_Tyr TyrKc PTKc Pkinase S_TKc S_TKc PTKc_EGFR_like PTKc_Csk_like PTKc_Src_like PTKc_Syk_like PTKc_Abl PTKc_Jak_rpt2 …	-1.3
		29.4	protein.postranslational modification	os03g0160100	Transcript	highly similar to ( 749) AT1G08720 | Symbols: EDR1, ATEDR1 | EDR1 (ENHANCED DISEASE RESISTANCE 1); MAP kinase kinase kinase/ kinase/ protein serine/threonine/tyrosine kinase | chr1:2774089-2779077 FORWARDweakly similar to ( 112) PSKR_DAUCA Phytosulfokine receptor precursor (EC 2.7.11.1) (Phytosulfokine LRR receptor kinase) - Daucus carota (Carrot) Pkinase_Tyr S_TKc TyrKc PTKc S_TKc Pkinase PTKc_C…	1.2
		29.4	protein.postranslational modification	os12g0586100	Transcript	highly similar to ( 587) AT4G33950 | Symbols: OST1, SNRK2-6, SRK2E, SNRK2.6, P44 | OST1 (OPEN STOMATA 1); calcium-dependent protein serine/threonine kinase/ kinase/ protein kinase | chr4:16272819-16274657 FORWARDhighly similar to ( 701) SAPK9_ORYSA Serine/threonine-protein kinase SAPK9 (EC 2.7.11.1) (Osmotic stress/abscisic acid-activated protein kinase 9) - Oryza sativa (Rice) S_TKc S_TKc Pkinas…	-2
		29.4	protein.postranslational modification	os02g0595900	Transcript	weakly similar to ( 152) AT5G50200 | Symbols: WR3, ATNRT3.1, NRT3.1 | WR3 (WOUND-RESPONSIVE 3); nitrate transmembrane transporter | chr5:20436612-20437535 FORWARD protein|high affinity nitrate transporter, putative, expressed	-2.4
		29.4	protein.postranslational modification	os08g0484600	Transcript	highly similar to ( 796) AT3G01090 | Symbols: AKIN10 | AKIN10 (Arabidopsis SNF1 kinase homolog 10); protein binding / protein kinase | chr3:31437-33977 REVERSEhighly similar to ( 833) RKIN1_SECCE Carbon catabolite derepressing protein kinase (EC 2.7.11.1) - Secale cereale (Rye) S_TKc S_TKc Pkinase SPS1 Pkinase_Tyr TyrKc PTKc PTKc_FAK PTKc_Srm_Brk PTKc_Jak_rpt2 PTKc_Tec_Rlk PTKc_Tec_like PTKc_PDGF…	2.4
		29.4	protein.postranslational modification	os03g0285800	Transcript	highly similar to ( 576) AT3G45640 | Symbols: ATMPK3, MPK3 | ATMPK3 (ARABIDOPSIS THALIANA MITOGEN-ACTIVATED PROTEIN KINASE 3); MAP kinase/ kinase/ protein binding / protein kinase | chr3:16756918-16758476 FORWARDhighly similar to ( 755) MPK5_ORYSA Mitogen-activated protein kinase 5 (EC 2.7.11.24) (MAP kinase 5) (OsMAPK5) (OsMAP1) (Benzothiadiazole-induced MAP kinase 1) (OsBIMK1) (MAP kinase 2) (O…	1.9
		29.4	protein.postranslational modification	os02g0126400	Transcript	highly similar to ( 783) AT2G17890 | Symbols: CPK16 | CPK16; ATP binding / calcium ion binding / calmodulin-dependent protein kinase/ protein kinase/ protein serine/threonine kinase | chr2:7769885-7772627 REVERSEmoderately similar to ( 436) CRK_DAUCA CDPK-related protein kinase (EC 2.7.11.1) (PK421) - Daucus carota (Carrot) S_TKc S_TKc Pkinase SPS1 Pkinase_Tyr TyrKc PTKc PTKc_Tec_like protein|CAM…	-5.1
		29.4	protein.postranslational modification	os03g0841800	Transcript	highly similar to ( 718) AT1G09840 | Symbols: ATSK41 | ATSK41 (SHAGGY-LIKE PROTEIN KINASE 41); ATP binding / protein kinase/ protein serine/threonine kinase | chr1:3196114-3199524 REVERSEhighly similar to ( 660) MSK2_MEDSA Glycogen synthase kinase-3 homolog MsK-2 (EC 2.7.11.1) - Medicago sativa (Alfalfa) S_TKc S_TKc Pkinase SPS1 TyrKc Pkinase_Tyr PTKc PTKc_Jak_rpt2 PTKc_Jak2_Jak3_rpt2 PTKc_Syk_li…	4.5
		29.4	protein.postranslational modification	os05g0530500	Transcript	highly similar to ( 835) AT3G01090 | Symbols: AKIN10 | AKIN10 (Arabidopsis SNF1 kinase homolog 10); protein binding / protein kinase | chr3:31437-33977 REVERSEhighly similar to ( 697) RKIN1_SECCE Carbon catabolite derepressing protein kinase (EC 2.7.11.1) - Secale cereale (Rye) S_TKc S_TKc Pkinase SPS1 Pkinase_Tyr TyrKc PTKc PTKc_Jak_rpt2 PTKc_FAK PTKc_Tec_Rlk PTKc_Srm_Brk PTKc_Tec_like PTKc_Csk_…	1
		29.4	protein.postranslational modification	os03g0610900	Transcript	highly similar to ( 596) AT4G33950 | Symbols: OST1, SNRK2-6, SRK2E, SNRK2.6, P44 | OST1 (OPEN STOMATA 1); calcium-dependent protein serine/threonine kinase/ kinase/ protein kinase | chr4:16272819-16274657 FORWARDhighly similar to ( 701) SAPKA_ORYSA Serine/threonine-protein kinase SAPK10 (EC 2.7.11.1) (Osmotic stress/abscisic acid-activated protein kinase 10) - Oryza sativa (Rice) S_TKc S_TKc Pkin…	1.3
		29.4	protein.postranslational modification	os11g0113700	Transcript	moderately similar to ( 490) AT5G07070 | Symbols: CIPK2, SnRK3.2 | CIPK2 (CBL-INTERACTING PROTEIN KINASE 2); ATP binding / kinase/ protein kinase/ protein serine/threonine kinase | chr5:2196743-2198113 REVERSEmoderately similar to ( 404) CIPK1_ORYSA CIPK-like protein 1 (EC 2.7.11.1) (OsCK1) - Oryza sativa (Rice) S_TKc S_TKc Pkinase SPS1 Pkinase_Tyr TyrKc PTKc PTKc_Csk_like PTKc_Jak_rpt2 PTKc_Srm_…	5.2
		29.4	protein.postranslational modification	os03g0793500	Transcript	nearly identical (1057) AT3G03940 | Symbols: | protein kinase family protein | chr3:1014412-1018244 REVERSE Pkinase S_TKc SPS1 S_TKc protein|CK1_CaseinKinase_1a.4 - CK1 includes the casein kinase 1 kinases, expressed	2.3
		29.4	protein.postranslational modification	os12g0101800	Transcript	highly similar to ( 873) AT3G45780 | Symbols: PHOT1, NPH1, JK224, RPT1 | PHOT1 (PHOTOTROPIN 1); FMN binding / blue light photoreceptor/ kinase/ protein binding / protein serine/threonine kinase | chr3:16818557-16823960 FORWARDmoderately similar to ( 330) G11A_ORYSA Protein kinase G11A (EC 2.7.11.1) - Oryza sativa (Rice) S_TKc S_TKc Pkinase SPS1 Pkinase_Tyr TyrKc PTKc PTKc_Jak_rpt2 PTKc_Jak2_Jak3_…	-1.9
		29.4	protein.postranslational modification	os07g0176600	Transcript	highly similar to ( 583) AT3G04810 | Symbols: ATNEK2 | ATNEK2 (NIMA-RELATED KINASE 2); ATP binding / kinase/ protein kinase/ protein serine/threonine kinase | chr3:1318096-1321101 FORWARDweakly similar to ( 122) M2K1_ORYSA Mitogen-activated protein kinase kinase 1 (EC 2.7.12.2) (MAP kinase kinase 1) (MAPKK1) (OsMEK1) - Oryza sativa (Rice) S_TKc S_TKc Pkinase Pkinase_Tyr PTKc TyrKc SPS1 PTKc_Jak_r…	2.1
		29.4	protein.postranslational modification	os06g0724900	Transcript	highly similar to ( 591) AT4G38470 | Symbols: | protein kinase family protein | chr4:17999432-18003551 FORWARDweakly similar to ( 122) NORK_MEDTR Nodulation receptor kinase precursor (EC 2.7.11.1) (Does not make infections protein 2) (Symbiosis receptor-like kinase) (MtSYMRK) - Medicago truncatula (Barrel medic) Pkinase_Tyr TyrKc PTKc S_TKc S_TKc Pkinase PTKc_Tec_like PTKc_Csk_like PTKc_Abl PTKc_…	2.4
		29.4.1.56	protein.postranslational modification.kinase.receptor like cytoplasmatic kinase VI	os06g0663900	Transcript	weakly similar to ( 155) AT5G65530 | Symbols: | protein kinase, putative | chr5:26190844-26192826 REVERSE protein|protein kinase domain containing protein, expressed	3.1
		29.4.1.57	protein.postranslational modification.kinase.receptor like cytoplasmatic kinase VII	os04g0457800	Transcript	highly similar to ( 784) AT1G71830 | Symbols: SERK1, ATSERK1 | SERK1 (SOMATIC EMBRYOGENESIS RECEPTOR-LIKE KINASE 1); kinase/ transmembrane receptor protein serine/threonine kinase | chr1:27018575-27021842 FORWARDmoderately similar to ( 212) PSKR_DAUCA Phytosulfokine receptor precursor (EC 2.7.11.1) (Phytosulfokine LRR receptor kinase) - Daucus carota (Carrot) S_TKc TyrKc PTKc S_TKc Pkinase_Tyr Pk…	-1.1
		29.4.1.57	protein.postranslational modification.kinase.receptor like cytoplasmatic kinase VII	os01g0769700	Transcript	nearly identical (1103) AT3G51550 | Symbols: FER | FER (FERONIA); kinase/ protein kinase | chr3:19117877-19120564 REVERSEmoderately similar to ( 255) NORK_MEDTR Nodulation receptor kinase precursor (EC 2.7.11.1) (Does not make infections protein 2) (Symbiosis receptor-like kinase) (MtSYMRK) - Medicago truncatula (Barrel medic) PTKc TyrKc Pkinase_Tyr S_TKc S_TKc Pkinase PTKc_Jak_rpt2 PTKc_Trk PTK_…	1.7
		29.4.1.57	protein.postranslational modification.kinase.receptor like cytoplasmatic kinase VII	os07g0668900	Transcript	highly similar to ( 539) AT5G18610 | Symbols: | protein kinase family protein | chr5:6192736-6195371 FORWARDmoderately similar to ( 251) NORK_PEA Nodulation receptor kinase precursor (EC 2.7.11.1) - Pisum sativum (Garden pea) Pkinase_Tyr TyrKc PTKc S_TKc S_TKc Pkinase PTKc_Srm_Brk PTKc_Csk_like PTKc_Src_like PTKc_EGFR_like PTKc_Trk PTKc_Ror PTKc_Jak_rpt2 PTKc_Tec_like PTKc_Ror1 PTKc_Frk_like PTKc…	-1.4
		29.4.1.57	protein.postranslational modification.kinase.receptor like cytoplasmatic kinase VII	os03g0839900	Transcript	moderately similar to ( 417) AT1G77280 | Symbols: | protein kinase family protein | chr1:29031468-29035882 REVERSEweakly similar to ( 195) NORK_MEDTR Nodulation receptor kinase precursor (EC 2.7.11.1) (Does not make infections protein 2) (Symbiosis receptor-like kinase) (MtSYMRK) - Medicago truncatula (Barrel medic) S_TKc S_TKc Pkinase PTKc Pkinase_Tyr TyrKc SPS1 PTKc_Csk_like PTKc_Trk PTKc_Jak_r…	-1.6
		29.4.1.57	protein.postranslational modification.kinase.receptor like cytoplasmatic kinase VII	os08g0442700	Transcript	moderately similar to ( 485) AT2G23950 | Symbols: | leucine-rich repeat family protein / protein kinase family protein | chr2:10187204-10189969 REVERSEmoderately similar to ( 217) PSKR_DAUCA Phytosulfokine receptor precursor (EC 2.7.11.1) (Phytosulfokine LRR receptor kinase) - Daucus carota (Carrot) TyrKc Pkinase_Tyr PTKc S_TKc S_TKc Pkinase PTKc_Jak_rpt2 PTKc_Srm_Brk PTKc_Syk_like PTKc_Csk_like …	3.1
		29.4.1.57	protein.postranslational modification.kinase.receptor like cytoplasmatic kinase VII	os10g0442800	Transcript	moderately similar to ( 440) AT5G03320 | Symbols: | protein kinase, putative | chr5:802759-804242 FORWARDmoderately similar to ( 227) NORK_MEDTR Nodulation receptor kinase precursor (EC 2.7.11.1) (Does not make infections protein 2) (Symbiosis receptor-like kinase) (MtSYMRK) - Medicago truncatula (Barrel medic) S_TKc S_TKc Pkinase TyrKc Pkinase_Tyr PTKc PTKc_Jak_rpt2 PTKc_EGFR_like PTKc_Csk_like …	2.8
		29.4.1.57	protein.postranslational modification.kinase.receptor like cytoplasmatic kinase VII	os07g0693000	Transcript	moderately similar to ( 395) AT4G18640 | Symbols: MRH1 | MRH1 (morphogenesis of root hair 1); ATP binding / protein binding / protein kinase/ protein serine/threonine kinase/ protein tyrosine kinase | chr4:10260481-10263577 FORWARDweakly similar to ( 115) NORK_PEA Nodulation receptor kinase precursor (EC 2.7.11.1) - Pisum sativum (Garden pea) Pkinase protein|MRH1, putative, expressed	1.6
		29.4.1.57	protein.postranslational modification.kinase.receptor like cytoplasmatic kinase VII	os01g0917500	Transcript	highly similar to ( 828) AT5G07280 | Symbols: EMS1, EXS | EMS1 (EXCESS MICROSPOROCYTES1); kinase/ transmembrane receptor protein kinase | chr5:2285088-2288666 FORWARDmoderately similar to ( 412) PSKR_DAUCA Phytosulfokine receptor precursor (EC 2.7.11.1) (Phytosulfokine LRR receptor kinase) - Daucus carota (Carrot) PTKc Pkinase_Tyr TyrKc S_TKc Pkinase S_TKc PTKc_Csk_like PTKc_EGFR_like PTKc_EphR P…	-1
		29.4.1.57	protein.postranslational modification.kinase.receptor like cytoplasmatic kinase VII	os08g0174700	Transcript	highly similar to ( 927) AT1G34210 | Symbols: SERK2, ATSERK2 | SERK2 (SOMATIC EMBRYOGENESIS RECEPTOR-LIKE KINASE 2); kinase | chr1:12459078-12462752 FORWARDmoderately similar to ( 222) PSKR_DAUCA Phytosulfokine receptor precursor (EC 2.7.11.1) (Phytosulfokine LRR receptor kinase) - Daucus carota (Carrot) S_TKc TyrKc PTKc Pkinase_Tyr S_TKc Pkinase PTKc_EphR PTKc_Jak_rpt2 PTKc_InsR_like PTKc_Srm_Br…	-1.6
		29.4.1.57	protein.postranslational modification.kinase.receptor like cytoplasmatic kinase VII	os02g0648100	Transcript	moderately similar to ( 261) AT1G33260 | Symbols: | protein kinase family protein | chr1:12064796-12066114 FORWARDweakly similar to ( 172) NORK_MEDTR Nodulation receptor kinase precursor (EC 2.7.11.1) (Does not make infections protein 2) (Symbiosis receptor-like kinase) (MtSYMRK) - Medicago truncatula (Barrel medic) S_TKc S_TKc Pkinase PTKc Pkinase_Tyr TyrKc SPS1 PTKc_Jak_rpt2 PTKc_Src_like PTKc_…	1.9
		29.4.1.57	protein.postranslational modification.kinase.receptor like cytoplasmatic kinase VII	os03g0179400	Transcript	moderately similar to ( 475) AT2G05940 | Symbols: | protein kinase, putative | chr2:2287514-2289270 REVERSEmoderately similar to ( 218) NORK_PEA Nodulation receptor kinase precursor (EC 2.7.11.1) - Pisum sativum (Garden pea) Pkinase_Tyr TyrKc PTKc S_TKc S_TKc Pkinase PTKc_Jak_rpt2 PTKc_InsR_like PTKc_Srm_Brk PTKc_Csk_like PTKc_c-ros PTKc_EphR SPS1 PTKc_Fes_like PTKc_Src_like PTKc_EGFR_like PTKc_S…	-1
		29.4.1.57	protein.postranslational modification.kinase.receptor like cytoplasmatic kinase VII	os03g0274800	Transcript	highly similar to ( 513) AT2G28930 | Symbols: APK1B | APK1B; ATP binding / kinase/ protein kinase/ protein serine/threonine kinase | chr2:12424551-12426565 FORWARDmoderately similar to ( 234) NORK_MEDTR Nodulation receptor kinase precursor (EC 2.7.11.1) (Does not make infections protein 2) (Symbiosis receptor-like kinase) (MtSYMRK) - Medicago truncatula (Barrel medic) Pkinase_Tyr PTKc TyrKc Pkina…	1.2
		29.4.1.57	protein.postranslational modification.kinase.receptor like cytoplasmatic kinase VII	os01g0323100	Transcript	moderately similar to ( 474) AT3G17410 | Symbols: | serine/threonine protein kinase, putative | chr3:5956601-5958882 FORWARDmoderately similar to ( 201) NORK_MEDTR Nodulation receptor kinase precursor (EC 2.7.11.1) (Does not make infections protein 2) (Symbiosis receptor-like kinase) (MtSYMRK) - Medicago truncatula (Barrel medic) Pkinase_Tyr TyrKc PTKc S_TKc Pkinase S_TKc PTKc_Jak_rpt2 PTKc_Csk_l…	2.9
		29.4.1.57	protein.postranslational modification.kinase.receptor like cytoplasmatic kinase VII	os04g0684200	Transcript	highly similar to ( 563) AT1G63500 | Symbols: | ATP binding / binding / protein kinase/ protein serine/threonine kinase/ protein tyrosine kinase | chr1:23556015-23558403 FORWARD protein|protein kinase family protein, putative, expressed	-2.1
		29.4.1.57	protein.postranslational modification.kinase.receptor like cytoplasmatic kinase VII	os04g0619400	Transcript	moderately similar to ( 461) AT1G16670 | Symbols: | protein kinase family protein | chr1:5697846-5699492 FORWARDmoderately similar to ( 228) NORK_PEA Nodulation receptor kinase precursor (EC 2.7.11.1) - Pisum sativum (Garden pea) TyrKc PTKc Pkinase_Tyr S_TKc Pkinase S_TKc PTKc_Src_like PTKc_Srm_Brk PTKc_Csk_like PTKc_Frk_like PTKc_EphR PTKc_Src PTKc_Lck_Blk PTKc_Fyn_Yrk PTKc_Jak_rpt2 PTKc_Trk PTK…	1.4
		29.4.1.57	protein.postranslational modification.kinase.receptor like cytoplasmatic kinase VII	os04g0563900	Transcript	moderately similar to ( 457) AT2G17220 | Symbols: | protein kinase, putative | chr2:7487866-7489768 REVERSEmoderately similar to ( 234) NORK_MEDTR Nodulation receptor kinase precursor (EC 2.7.11.1) (Does not make infections protein 2) (Symbiosis receptor-like kinase) (MtSYMRK) - Medicago truncatula (Barrel medic) Pkinase_Tyr S_TKc PTKc TyrKc Pkinase S_TKc PTKc_Jak_rpt2 PTKc_Tyk2_rpt2 PTKc_Csk_lik…	1.4
		29.4.1.57	protein.postranslational modification.kinase.receptor like cytoplasmatic kinase VII	os03g0130900	Transcript	moderately similar to ( 427) AT1G20650 | Symbols: | ATP binding / protein kinase/ protein serine/threonine kinase | chr1:7158422-7160022 REVERSEmoderately similar to ( 224) NORK_PEA Nodulation receptor kinase precursor (EC 2.7.11.1) - Pisum sativum (Garden pea) PTKc Pkinase_Tyr TyrKc S_TKc Pkinase S_TKc PTKc_Csk_like PTKc_Src_like PTKc_Jak_rpt2 PTKc_Srm_Brk PTKc_Ror PTKc_EGFR_like PTKc_InsR_like …	-1.8
		29.4.1.57	protein.postranslational modification.kinase.receptor like cytoplasmatic kinase VII	os04g0490500	Transcript	moderately similar to ( 263) AT3G59350 | Symbols: | serine/threonine protein kinase, putative | chr3:21932930-21934883 FORWARDweakly similar to ( 146) NORK_MEDTR Nodulation receptor kinase precursor (EC 2.7.11.1) (Does not make infections protein 2) (Symbiosis receptor-like kinase) (MtSYMRK) - Medicago truncatula (Barrel medic) Pkinase_Tyr PTKc TyrKc S_TKc Pkinase S_TKc protein|STRUBBELIG-RECEPTO…	-1.5
		29.4.1.57	protein.postranslational modification.kinase.receptor like cytoplasmatic kinase VII	os11g0556400	Transcript	weakly similar to ( 183) AT1G21240 | Symbols: WAK3 | WAK3 (wall associated kinase 3); kinase/ protein serine/threonine kinase | chr1:7434303-7436702 FORWARDweakly similar to ( 149) KPRO_MAIZE Putative receptor protein kinase ZmPK1 precursor (EC 2.7.11.1) - Zea mays (Maize) Pkinase_Tyr TyrKc S_TKc S_TKc Pkinase PTKc PTKc_Csk_like PTKc_Fes_like PTKc_Fes PTKc_Src_like PTKc_Ror PTKc_EphR PTKc_Fer PTK…	2.7
		29.4.1.57	protein.postranslational modification.kinase.receptor like cytoplasmatic kinase VII	os06g0714900	Transcript	moderately similar to ( 349) AT5G47070 | Symbols: | protein kinase, putative | chr5:19118683-19120528 REVERSEweakly similar to ( 182) PSKR_DAUCA Phytosulfokine receptor precursor (EC 2.7.11.1) (Phytosulfokine LRR receptor kinase) - Daucus carota (Carrot) S_TKc S_TKc PTKc Pkinase Pkinase_Tyr TyrKc PTKc_Jak_rpt2 PTKc_Csk_like SPS1 PTKc_EphR PTKc_Syk_like PTKc_EGFR_like PTKc_InsR_like PTKc_Fes_like …	4.1
		29.4.1.57	protein.postranslational modification.kinase.receptor like cytoplasmatic kinase VII	os10g0548700	Transcript	highly similar to ( 552) AT2G45910 | Symbols: | protein kinase family protein / U-box domain-containing protein | chr2:18894520-18898212 FORWARDweakly similar to ( 149) NORK_MEDTR Nodulation receptor kinase precursor (EC 2.7.11.1) (Does not make infections protein 2) (Symbiosis receptor-like kinase) (MtSYMRK) - Medicago truncatula (Barrel medic) S_TKc S_TKc Pkinase Pkinase_Tyr TyrKc STK_N PTKc SP…	1.6
		29.4.1.57	protein.postranslational modification.kinase.receptor like cytoplasmatic kinase VII	os09g0533600	Transcript	moderately similar to ( 393) AT5G47070 | Symbols: | protein kinase, putative | chr5:19118683-19120528 REVERSEmoderately similar to ( 204) PSKR_DAUCA Phytosulfokine receptor precursor (EC 2.7.11.1) (Phytosulfokine LRR receptor kinase) - Daucus carota (Carrot) Pkinase_Tyr TyrKc Pkinase PTKc S_TKc S_TKc PTKc_Jak_rpt2 PTKc_Syk_like PTKc_Csk_like PTKc_Tyk2_rpt2 PTKc_DDR PTKc_EphR SPS1 PTKc_EGFR_like P…	-1.1
		29.4.1.57	protein.postranslational modification.kinase.receptor like cytoplasmatic kinase VII	os06g0693200	Transcript	moderately similar to ( 408) AT2G18890 | Symbols: | protein kinase family protein | chr2:8184027-8185673 FORWARDmoderately similar to ( 201) PSKR_DAUCA Phytosulfokine receptor precursor (EC 2.7.11.1) (Phytosulfokine LRR receptor kinase) - Daucus carota (Carrot) PTKc Pkinase_Tyr S_TKc TyrKc S_TKc Pkinase SPS1 PTKc_Csk_like PTKc_EGFR_like PTKc_Chk PTKc_Src_like PTKc_FGFR PTKc_Jak_rpt2 PTKc_Srm_Brk …	2.4
		29.4.1.57	protein.postranslational modification.kinase.receptor like cytoplasmatic kinase VII	os05g0387700	Transcript	moderately similar to ( 290) AT3G51990 | Symbols: | protein kinase family protein | chr3:19287989-19289077 FORWARDweakly similar to ( 190) CRI4_MAIZE Putative receptor protein kinase CRINKLY4 precursor (EC 2.7.11.1) - Zea mays (Maize) Pkinase_Tyr TyrKc S_TKc S_TKc PTKc Pkinase SPS1 PTKc_Jak_rpt2 PTKc_Src_like PTKc_Csk_like protein|TKL_IRAK_CR4L.5 - The CR4L subfamily has homology with Crinkly4, e…	2.4
		29.4.1.57	protein.postranslational modification.kinase.receptor like cytoplasmatic kinase VII	os03g0132800	Transcript	highly similar to ( 782) AT4G35230 | Symbols: BSK1 | BSK1 (BR-SIGNALING KINASE 1); ATP binding / binding / kinase/ protein kinase/ protein tyrosine kinase | chr4:16755325-16758041 REVERSEweakly similar to ( 114) CRI4_MAIZE Putative receptor protein kinase CRINKLY4 precursor (EC 2.7.11.1) - Zea mays (Maize) TyrKc S_TKc S_TKc Pkinase PTKc Pkinase_Tyr PTKc_Csk_like protein|protein kinase family prot…	-1
		29.4.1.57	protein.postranslational modification.kinase.receptor like cytoplasmatic kinase VII	os06g0202900	Transcript	moderately similar to ( 434) AT2G05940 | Symbols: | protein kinase, putative | chr2:2287514-2289270 REVERSEmoderately similar to ( 228) NORK_MEDTR Nodulation receptor kinase precursor (EC 2.7.11.1) (Does not make infections protein 2) (Symbiosis receptor-like kinase) (MtSYMRK) - Medicago truncatula (Barrel medic) TyrKc PTKc Pkinase_Tyr S_TKc Pkinase S_TKc PTKc_Jak_rpt2 PTKc_Csk_like PTKc_Srm_Brk …	1.5
		29.4.1.57	protein.postranslational modification.kinase.receptor like cytoplasmatic kinase VII	os09g0569800	Transcript	moderately similar to ( 402) AT2G45910 | Symbols: | protein kinase family protein / U-box domain-containing protein | chr2:18894520-18898212 FORWARDweakly similar to ( 160) PSKR_DAUCA Phytosulfokine receptor precursor (EC 2.7.11.1) (Phytosulfokine LRR receptor kinase) - Daucus carota (Carrot) S_TKc S_TKc Pkinase_Tyr Pkinase TyrKc PTKc SPS1 STK_N PTKc_Csk_like PTKc_Src_like PTKc_Frk_like PTKc_Jak_…	-1.4
		29.4.1.57	protein.postranslational modification.kinase.receptor like cytoplasmatic kinase VII	os05g0498900	Transcript	moderately similar to ( 467) AT3G20530 | Symbols: | protein kinase family protein | chr3:7166318-7167806 FORWARDmoderately similar to ( 229) NORK_MEDTR Nodulation receptor kinase precursor (EC 2.7.11.1) (Does not make infections protein 2) (Symbiosis receptor-like kinase) (MtSYMRK) - Medicago truncatula (Barrel medic) TyrKc PTKc Pkinase_Tyr S_TKc S_TKc Pkinase PTKc_Ror PTKc_Jak_rpt2 PTKc_EGFR_lik…	-1.4
		29.4.1.57	protein.postranslational modification.kinase.receptor like cytoplasmatic kinase VII	os01g0588500	Transcript	highly similar to ( 624) AT5G15080 | Symbols: | protein kinase, putative | chr5:4886414-4888555 FORWARDmoderately similar to ( 235) NORK_PEA Nodulation receptor kinase precursor (EC 2.7.11.1) - Pisum sativum (Garden pea) Pkinase_Tyr TyrKc PTKc Pkinase S_TKc S_TKc PTKc_Jak_rpt2 PTKc_InsR_like PTKc_Srm_Brk PTKc_EphR PTKc_Csk_like PTKc_Ror SPS1 PTKc_Trk PTKc_Tyk2_rpt2 PTKc_Fes_like PTKc_DDR PTKc_EGF…	6.2
		29.4.1.57	protein.postranslational modification.kinase.receptor like cytoplasmatic kinase VII	os02g0777800	Transcript	moderately similar to ( 202) AT2G05940 | Symbols: | protein kinase, putative | chr2:2287514-2289270 REVERSEweakly similar to ( 116) NORK_MEDTR Nodulation receptor kinase precursor (EC 2.7.11.1) (Does not make infections protein 2) (Symbiosis receptor-like kinase) (MtSYMRK) - Medicago truncatula (Barrel medic) protein|tyrosine protein kinase domain containing protein, putative, expressed	1.1
		29.4.1.57	protein.postranslational modification.kinase.receptor like cytoplasmatic kinase VII	os04g0685900	Transcript	highly similar to ( 766) AT1G66150 | Symbols: TMK1 | TMK1 (TRANSMEMBRANE KINASE 1); transmembrane receptor protein serine/threonine kinase | chr1:24631503-24634415 FORWARDmoderately similar to ( 245) PSKR_DAUCA Phytosulfokine receptor precursor (EC 2.7.11.1) (Phytosulfokine LRR receptor kinase) - Daucus carota (Carrot) Pkinase_Tyr TyrKc PTKc S_TKc S_TKc Pkinase PTKc_Src_like PTKc_Jak_rpt2 PTKc_Tr…	2.2
		29.4.1.57	protein.postranslational modification.kinase.receptor like cytoplasmatic kinase VII	os11g0168600	Transcript	moderately similar to ( 258) AT5G42440 | Symbols: | protein kinase family protein | chr5:16973434-16974513 REVERSEmoderately similar to ( 247) PSKR_DAUCA Phytosulfokine receptor precursor (EC 2.7.11.1) (Phytosulfokine LRR receptor kinase) - Daucus carota (Carrot) Pkinase S_TKc Pkinase_Tyr S_TKc TyrKc PTKc SPS1 PTKc_Srm_Brk PTKc_Frk_like PTKc_Jak_rpt2 PTKc_EphR PTKc_Src_like PTKc_Csk_like PTKc_Syk…	1.7
		29.4.1.57	protein.postranslational modification.kinase.receptor like cytoplasmatic kinase VII	os04g0543000	Transcript	moderately similar to ( 343) AT3G09830 | Symbols: | protein kinase, putative | chr3:3017199-3018696 FORWARDmoderately similar to ( 205) PSKR_DAUCA Phytosulfokine receptor precursor (EC 2.7.11.1) (Phytosulfokine LRR receptor kinase) - Daucus carota (Carrot) Pkinase_Tyr PTKc TyrKc S_TKc Pkinase S_TKc PTKc_Jak_rpt2 PTKc_EGFR_like PTKc_Syk_like PTKc_Csk_like PTKc_EphR SPS1 PTKc_Fes_like PTKc_Ror PTKc…	1.4
		29.4.1.57	protein.postranslational modification.kinase.receptor like cytoplasmatic kinase VII	os03g0364400	Transcript	moderately similar to ( 401) AT1G61590 | Symbols: | protein kinase, putative | chr1:22723691-22726022 REVERSEweakly similar to ( 184) NORK_MEDTR Nodulation receptor kinase precursor (EC 2.7.11.1) (Does not make infections protein 2) (Symbiosis receptor-like kinase) (MtSYMRK) - Medicago truncatula (Barrel medic) Pkinase_Tyr TyrKc PTKc S_TKc S_TKc Pkinase PTKc_Jak_rpt2 PTKc_Csk_like PTKc_Fes_like P…	-2.1
		29.4.1.57	protein.postranslational modification.kinase.receptor like cytoplasmatic kinase VII	os03g0407900	Transcript	moderately similar to ( 458) AT2G05940 | Symbols: | protein kinase, putative | chr2:2287514-2289270 REVERSEmoderately similar to ( 228) NORK_PEA Nodulation receptor kinase precursor (EC 2.7.11.1) - Pisum sativum (Garden pea) TyrKc Pkinase_Tyr PTKc S_TKc Pkinase S_TKc PTKc_Jak_rpt2 PTKc_DDR PTKc_Csk_like PTKc_Ror PTKc_c-ros PTKc_Trk PTKc_EphR PTKc_ALK_LTK PTKc_Fes_like SPS1 PTKc_Srm_Brk PTKc_InsR_…	1.2
		29.4.1.57	protein.postranslational modification.kinase.receptor like cytoplasmatic kinase VII	os09g0442100	Transcript	moderately similar to ( 449) AT2G05940 | Symbols: | protein kinase, putative | chr2:2287514-2289270 REVERSEmoderately similar to ( 222) NORK_MEDTR Nodulation receptor kinase precursor (EC 2.7.11.1) (Does not make infections protein 2) (Symbiosis receptor-like kinase) (MtSYMRK) - Medicago truncatula (Barrel medic) PTKc Pkinase_Tyr TyrKc S_TKc Pkinase S_TKc PTKc_EphR PTKc_Jak_rpt2 PTKc_Csk_like PTK…	2.7
		29.4.1.57	protein.postranslational modification.kinase.receptor like cytoplasmatic kinase VII	os07g0686800	Transcript	moderately similar to ( 397) AT1G69790 | Symbols: | protein kinase, putative | chr1:26266838-26268818 FORWARDmoderately similar to ( 202) NORK_MEDTR Nodulation receptor kinase precursor (EC 2.7.11.1) (Does not make infections protein 2) (Symbiosis receptor-like kinase) (MtSYMRK) - Medicago truncatula (Barrel medic) TyrKc Pkinase_Tyr Pkinase PTKc S_TKc S_TKc PTKc_Jak_rpt2 PTKc_Tyk2_rpt2 PTKc_Csk_l…	1.3
		29.4.1.57	protein.postranslational modification.kinase.receptor like cytoplasmatic kinase VII	os02g0218600	Transcript	highly similar to ( 526) AT5G57035 | Symbols: | ATP binding / kinase/ protein kinase/ protein serine/threonine kinase/ ubiquitin-protein ligase | chr5:23080743-23083819 FORWARDweakly similar to ( 161) NORK_PEA Nodulation receptor kinase precursor (EC 2.7.11.1) - Pisum sativum (Garden pea) S_TKc S_TKc Pkinase TyrKc Pkinase_Tyr PTKc SPS1 STK_N PTKc_Jak_rpt2 PTKc_Src_like PTKc_InsR_like PTKc_Srm_Brk…	1.9
		29.4.1.57	protein.postranslational modification.kinase.receptor like cytoplasmatic kinase VII	os02g0650500	Transcript	moderately similar to ( 382) AT5G47070 | Symbols: | protein kinase, putative | chr5:19118683-19120528 REVERSEmoderately similar to ( 219) NORK_MEDTR Nodulation receptor kinase precursor (EC 2.7.11.1) (Does not make infections protein 2) (Symbiosis receptor-like kinase) (MtSYMRK) - Medicago truncatula (Barrel medic) Pkinase_Tyr TyrKc PTKc S_TKc Pkinase S_TKc PTKc_Jak_rpt2 PTKc_Csk_like PTKc_EphR P…	-1.7
		29.5	protein.degradation	os03g0790600	Transcript	moderately similar to ( 221) AT3G54720 | Symbols: AMP1, COP2, HPT, PT | AMP1 (ALTERED MERISTEM PROGRAM 1); carboxypeptidase/ dipeptidase | chr3:20254852-20257815 REVERSE protein|peptidase, putative, expressed	1.5
		29.5	protein.degradation	os02g0644000	Transcript	highly similar to ( 660) AT1G62710 | Symbols: BETA-VPE, BETAVPE | BETA-VPE (BETA VACUOLAR PROCESSING ENZYME); cysteine-type endopeptidase | chr1:23224070-23226857 REVERSEhighly similar to ( 674) VPE_RICCO Vacuolar-processing enzyme precursor (EC 3.4.22.-) (VPE) - Ricinus communis (Castor bean) Peptidase_C13 GPI8 protein|vacuolar-processing enzyme precursor, putative, expressed	-1.7
		29.5	protein.degradation	os02g0117400	Transcript	moderately similar to ( 488) AT2G03120 | Symbols: ATSPP | ATSPP (ARABIDOPSIS SIGNAL PEPTIDE PEPTIDASE); aspartic-type endopeptidase | chr2:937554-940083 FORWARD Peptidase_A22B PSN protein|signal peptide peptidase domain containing protein, expressed	5
		29.5.1	protein.degradation.subtilases	os01g0795000	Transcript	highly similar to ( 555) AT4G10540 | Symbols: | subtilase family protein | chr4:6512515-6515743 REVERSEPA_subtilisin_like protein|OsSub6 - Putative Subtilisin homologue, expressed	2.3
		29.5.2	protein.degradation.autophagy	os01g0614900	Transcript	highly similar to ( 556) AT5G45900 | Symbols: APG7, ATAPG7, ATG7, ATATG7 | APG7 (AUTOPHAGY 7); APG8 activating enzyme | chr5:18615304-18618436 FORWARD Apg7 ThiF ThiF_MoeB_HesA_family protein|ThiF family domain containing protein, putative, expressed	-1.6
		29.5.3	protein.degradation.cysteine protease	os04g0670500	Transcript	moderately similar to ( 412) AT5G43060 | Symbols: | cysteine proteinase, putative / thiol protease, putative | chr5:17269784-17272117 REVERSEhighly similar to ( 786) CYSP1_ORYSA Cysteine protease 1 precursor (EC 3.4.22.-) (OsCP1) - Oryza sativa (Rice) Peptidase_C1 Peptidase_C1A Pept_C1 Peptidase_C1 Peptidase_C1A_CathepsinC Peptidase_C1A_CathepsinB Peptidase_C1A_CathepsinX protein|cysteine proteas…	3.8
		29.5.3	protein.degradation.cysteine protease	os03g0344300	Transcript	moderately similar to ( 301) AT4G15880 | Symbols: ESD4 | ESD4 (EARLY IN SHORT DAYS 4); SUMO-specific protease/ cysteine-type peptidase | chr4:9012769-9015797 FORWARD ULP1 Peptidase_C48 protein|ulp1 protease family protein, putative, expressed	-1.2
		29.5.5	protein.degradation.serine protease	os09g0533400	Transcript	nearly identical (1237) AT5G47040 | Symbols: LON2 | LON2 (LON PROTEASE 2); ATP binding / ATP-dependent peptidase/ nucleoside-triphosphatase/ nucleotide binding / serine-type endopeptidase/ serine-type peptidase | chr5:19093356-19098678 REVERSEnearly identical (1419) LONH1_MAIZE Lon protease homolog 1, mitochondrial precursor (EC 3.4.21.-) - Zea mays (Maize) Lon PRK10787 Lon_C AAA LonB protein|OsL…	1.3
		29.5.5	protein.degradation.serine protease	os10g0101200	Transcript	moderately similar to ( 301) AT1G73270 | Symbols: scpl6 | scpl6 (serine carboxypeptidase-like 6); serine-type carboxypeptidase | chr1:27549021-27552517 REVERSEmoderately similar to ( 275) CBP1_ORYSA Serine carboxypeptidase 1 precursor (EC 3.4.16.5) (Serine carboxypeptidase I) (Carboxypeptidase C) - Oryza sativa (Rice) Peptidase_S10 COG2939 protein|OsSCP46 - Putative Serine Carboxypeptidase homolo…	-2.4
		29.5.9	protein.degradation.AAA type	os01g0683100	Transcript	highly similar to ( 746) AT1G80350 | Symbols: ERH3, AAA1, FRA2, LUE1, ATKTN1, KTN1, FRC2, BOT1, FTR | ERH3 (ECTOPIC ROOT HAIR 3); ATP binding / nucleoside-triphosphatase/ nucleotide binding | chr1:30205499-30208050 REVERSEweakly similar to ( 197) CDC48_SOYBN Cell division cycle protein 48 homolog (Valosin-containing protein homolog) (VCP) - Glycine max (Soybean) SpoVK RPT1 PRK03992 AAA HflB hflB …	1.1
		29.5.11	protein.degradation.ubiquitin	os02g0290500	Transcript	highly similar to ( 593) AT2G46500 | Symbols: | phosphatidylinositol 3- and 4-kinase family protein / ubiquitin family protein | chr2:19086741-19088534 REVERSE PI3_PI4_kinase protein|phosphatidylinositol 3- and 4-kinase family protein, putative, expressed	-1.4
		29.5.11.3	protein.degradation.ubiquitin.E2	os05g0557700	Transcript	highly similar to ( 682) AT2G33770 | Symbols: UBC24, ATUBC24, PHO2 | PHO2 (PHOSPHATE 2); ubiquitin-protein ligase | chr2:14277785-14281482 REVERSE UBCc UQ_con UBCc protein|ubiquitin conjugating enzyme protein, putative, expressed	-1.6
		29.5.11.4.2	protein.degradation.ubiquitin.E3.RING	os07g0673200	Transcript	moderately similar to ( 371) AT1G02860 | Symbols: NLA | NLA (nitrogen limitation adaptation); ubiquitin-protein ligase | chr1:635474-637083 FORWARDSPX protein|expressed protein	1.2
		29.5.11.4.2	protein.degradation.ubiquitin.E3.RING	os08g0539300	Transcript	weakly similar to ( 119) AT3G05545 | Symbols: | transcription factor, putative / zinc finger (C3HC4 type RING finger) family protein | chr3:1609436-1612133 FORWARD protein|zinc finger, C3HC4 type domain containing protein, expressed	4.2
		29.5.11.4.2	protein.degradation.ubiquitin.E3.RING	os02g0795300	Transcript	moderately similar to ( 416) AT3G54360 | Symbols: | protein binding / zinc ion binding | chr3:20128570-20131581 REVERSE protein|expressed protein	-7.6
		29.5.11.4.2	protein.degradation.ubiquitin.E3.RING	os01g0350900	Transcript	weakly similar to ( 144) AT3G05545 | Symbols: | transcription factor, putative / zinc finger (C3HC4 type RING finger) family protein | chr3:1609436-1612133 FORWARD protein|zinc finger, C3HC4 type domain containing protein, expressed	-1.4
		29.5.11.4.2	protein.degradation.ubiquitin.E3.RING	os03g0275900	Transcript	highly similar to ( 637) AT3G46510 | Symbols: PUB13, ATPUB13 | PUB13 (PLANT U-BOX 13); ubiquitin-protein ligase | chr3:17124106-17126539 REVERSEhighly similar to ( 673) SPL11_ORYSA Spotted leaf protein 11 (Spotted leaf11) (Cell death-related protein SPL11) - Oryza sativa (Rice) Ubox U-box protein|spotted leaf 11, putative, expressed	3.4
		29.5.11.4.2	protein.degradation.ubiquitin.E3.RING	os03g0232600	Transcript	moderately similar to ( 419) AT5G65920 | Symbols: | U-box domain-containing protein | chr5:26364323-26365657 REVERSEvery weakly similar to (80.5) SPL11_ORYSA Spotted leaf protein 11 (Spotted leaf11) (Cell death-related protein SPL11) - Oryza sativa (Rice)Ubox protein|U-box domain containing protein, expressed	1.5
		29.5.11.4.2	protein.degradation.ubiquitin.E3.RING	os01g0719100	Transcript	moderately similar to ( 282) AT5G25560 | Symbols: | zinc finger (C3HC4-type RING finger) family protein | chr5:8899486-8901453 FORWARD protein|RING finger and CHY zinc finger domain-containing protein 1, putative, expressed	-1.5
		29.5.11.4.3.2	protein.degradation.ubiquitin.E3.SCF.FBOX	os01g0853400	Transcript	moderately similar to ( 353) AT2G39940 | Symbols: COI1 | COI1 (CORONATINE INSENSITIVE 1); protein binding / ubiquitin-protein ligase | chr2:16672848-16675486 REVERSE protein|OsFBL4 - F-box domain and LRR containing protein, expressed	1.3
		29.5.11.4.3.2	protein.degradation.ubiquitin.E3.SCF.FBOX	os06g0154200	Transcript	highly similar to ( 590) AT2G42620 | Symbols: MAX2, ORE9, PP2 | MAX2 (MORE AXILLARY BRANCHES 2); ubiquitin-protein ligase | chr2:17756170-17758251 FORWARDnearly identical (1333) MAX2_ORYSA F-box/LRR-repeat MAX2 homolog (F-box and leucine-rich repeat MAX2 homolog) - Oryza sativa (Rice) protein|OsFBL27 - F-box domain and LRR containing protein, expressed	1.9
		29.5.11.4.3.2	protein.degradation.ubiquitin.E3.SCF.FBOX	os11g0547000	Transcript	highly similar to ( 882) AT1G68050 | Symbols: ADO3, FKF1 | FKF1 (FLAVIN-BINDING, KELCH REPEAT, F BOX 1); signal transducer/ two-component sensor/ ubiquitin-protein ligase | chr1:25508737-25510697 FORWARDnearly identical (1160) ADO3_ORYSA Adagio-like protein 3 - Oryza sativa (Rice) protein|OsFBO10 - F-box and other domain containing protein, expressed	1.2
		29.5.11.4.3.2	protein.degradation.ubiquitin.E3.SCF.FBOX	os03g0187500	Transcript	highly similar to ( 603) AT5G49980 | Symbols: AFB5 | AFB5 (Auxin F-Box protein 5); ubiquitin-protein ligase | chr5:20334420-20336531 REVERSE protein|AUXIN SIGNALING F-BOX 2, putative, expressed	1.1
		29.5.11.4.3.2	protein.degradation.ubiquitin.E3.SCF.FBOX	os03g0171600	Transcript	moderately similar to ( 455) AT1G14330 | Symbols: | kelch repeat-containing F-box family protein | chr1:4890375-4891700 REVERSE protein|OsFBK12 - F-box domain and kelch repeat containing protein, expressed	2.1
		17.2.2	hormone metabolism.auxin.signal transduction	os08g0529000	Transcript	moderately similar to ( 270) AT5G16530 | Symbols: PIN5 | PIN5 (PIN-FORMED 5); auxin:hydrogen symporter/ transporter | chr5:5400735-5402626 FORWARDmoderately similar to ( 474) PIN4_ORYSA Probable auxin efflux carrier component 4 (OsPIN4) - Oryza sativa (Rice)Mem_trans protein|auxin efflux carrier component, putative, expressed	1.6
		17.2.2	hormone metabolism.auxin.signal transduction	os05g0150500	Transcript	highly similar to ( 655) AT3G62980 | Symbols: TIR1 | TIR1 (TRANSPORT INHIBITOR RESPONSE 1); auxin binding / protein binding / ubiquitin-protein ligase | chr3:23273479-23276181 REVERSE protein|OsFBL21 - F-box domain and LRR containing protein, expressed	-1.4
		17.2.2	hormone metabolism.auxin.signal transduction	os03g0187500	Transcript	highly similar to ( 603) AT5G49980 | Symbols: AFB5 | AFB5 (Auxin F-Box protein 5); ubiquitin-protein ligase | chr5:20334420-20336531 REVERSE protein|AUXIN SIGNALING F-BOX 2, putative, expressed	1.1
		17.2.2	hormone metabolism.auxin.signal transduction	os09g0505400	Transcript	moderately similar to ( 259) AT5G16530 | Symbols: PIN5 | PIN5 (PIN-FORMED 5); auxin:hydrogen symporter/ transporter | chr5:5400735-5402626 FORWARDmoderately similar to ( 246) PIN4_ORYSA Probable auxin efflux carrier component 4 (OsPIN4) - Oryza sativa (Rice)Mem_trans protein|auxin efflux carrier component, putative, expressed	-1.9
		17.2.2	hormone metabolism.auxin.signal transduction	os06g0232300	Transcript	highly similar to ( 704) AT2G01420 | Symbols: PIN4 | PIN4 (PIN-FORMED 4); auxin:hydrogen symporter/ transporter | chr2:180478-183199 REVERSEnearly identical (1099) PIN1C_ORYSA Probable auxin efflux carrier component 1c (OsPIN1c) - Oryza sativa (Rice)Mem_trans protein|auxin efflux carrier component, putative, expressed	3.4
		17.2.2	hormone metabolism.auxin.signal transduction	os02g0743400	Transcript	highly similar to ( 776) AT1G73590 | Symbols: PIN1, ATPIN1 | PIN1 (PIN-FORMED 1); transporter | chr1:27659772-27662876 FORWARDnearly identical (1093) PIN1_ORYSA Auxin efflux carrier component 1 (OsPIN1) (Ethylene insensitive root 1 homolog) - Oryza sativa (Rice)Mem_trans protein|auxin efflux carrier component, putative, expressed	2.1
		17.2.2	hormone metabolism.auxin.signal transduction	os02g0221900	Transcript	moderately similar to ( 439) AT2G26170 | Symbols: CYP711A1 | CYP711A1; electron carrier/ heme binding / iron ion binding / monooxygenase/ oxygen binding | chr2:11141703-11143270 FORWARD p450 CypX protein|cytochrome P450, putative, expressed	2.7
		17.2.3	hormone metabolism.auxin.induced-regulated-responsive-activated	os01g0785400	Transcript	highly similar to ( 861) AT5G54510 | Symbols: GH3.6, DFL1 | DFL1 (DWARF IN LIGHT 1); indole-3-acetic acid amido synthetase | chr5:22131321-22133564 REVERSEnearly identical (1211) GH31_ORYSA Probable indole-3-acetic acid-amido synthetase GH3.1 (EC 6.3.2.-) (Auxin-responsive GH3-like protein 1) (OsGH3-1) - Oryza sativa (Rice)GH3 protein|OsGH3.1 - Probable indole-3-acetic acid-amido synthetase, expr…	-1.6
		17.2.3	hormone metabolism.auxin.induced-regulated-responsive-activated	os09g0545300	Transcript	very weakly similar to (88.2) AT5G27780 | Symbols: | auxin-responsive family protein | chr5:9838885-9839313 REVERSE protein|OsSAUR39 - Auxin-responsive SAUR gene family member, expressed	1.9
		17.2.3	hormone metabolism.auxin.induced-regulated-responsive-activated	os01g0741900	Transcript	very weakly similar to (90.1) AT3G16500 | Symbols: PAP1, IAA26 | PAP1 (PHYTOCHROME-ASSOCIATED PROTEIN 1); transcription factor | chr3:5612801-5614208 REVERSEmoderately similar to ( 414) IAA6_ORYSA Auxin-responsive protein IAA6 (Indoleacetic acid-induced protein 6) - Oryza sativa (Rice) protein|OsIAA6 - Auxin-responsive Aux/IAA gene family member, expressed	1.1
		17.2.3	hormone metabolism.auxin.induced-regulated-responsive-activated	os01g0764800	Transcript	highly similar to ( 865) AT4G37390 | Symbols: YDK1, GH3.2, BRU6, GH3-2, AUR3 | BRU6; indole-3-acetic acid amido synthetase | chr4:17579722-17581768 FORWARDnearly identical (1134) GH32_ORYSA Probable indole-3-acetic acid-amido synthetase GH3.2 (EC 6.3.2.-) (Auxin-responsive GH3-like protein 2) (OsGH3-2) - Oryza sativa (Rice)GH3 protein|OsGH3.2 - Probable indole-3-acetic acid-amido synthetase, expr…	1.2
		17.2.3	hormone metabolism.auxin.induced-regulated-responsive-activated	os07g0592600	Transcript	highly similar to ( 905) AT4G37390 | Symbols: YDK1, GH3.2, BRU6, GH3-2, AUR3 | BRU6; indole-3-acetic acid amido synthetase | chr4:17579722-17581768 FORWARDnearly identical (1234) GH38_ORYSA Probable indole-3-acetic acid-amido synthetase GH3.8 (EC 6.3.2.-) (Auxin-responsive GH3-like protein 8) (OsGH3-8) - Oryza sativa (Rice)GH3 protein|OsGH3.8 - Probable indole-3-acetic acid-amido synthetase, expr…	-1
		17.2.3	hormone metabolism.auxin.induced-regulated-responsive-activated	os01g0286900	Transcript	weakly similar to ( 102) AT3G17600 | Symbols: IAA31 | IAA31 (INDOLE-3-ACETIC ACID INDUCIBLE 31); transcription factor | chr3:6020281-6021040 REVERSEmoderately similar to ( 215) IAA4_ORYSA Auxin-responsive protein IAA4 (Indoleacetic acid-induced protein 4) - Oryza sativa (Rice)AUX_IAA protein|OsIAA4 - Auxin-responsive Aux/IAA gene family member, expressed	-1.1
		17.2.3	hormone metabolism.auxin.induced-regulated-responsive-activated	os05g0586200	Transcript	highly similar to ( 762) AT2G46370 | Symbols: JAR1, FIN219 | JAR1 (JASMONATE RESISTANT 1); ATP binding / adenylyltransferase/ catalytic/ jasmonate-amino synthetase | chr2:19034579-19036369 FORWARDnearly identical (1207) GH35_ORYSA Probable indole-3-acetic acid-amido synthetase GH3.5 (EC 6.3.2.-) (Auxin-responsive GH3-like protein 5) (OsGH3-5) - Oryza sativa (Rice)GH3 protein|OsGH3.5 - Probable in…	1.1
		17.2.3	hormone metabolism.auxin.induced-regulated-responsive-activated	os11g0528700	Transcript	moderately similar to ( 476) AT1G28130 | Symbols: GH3.17 | GH3.17; indole-3-acetic acid amido synthetase | chr1:9826379-9827883 FORWARDmoderately similar to ( 414) GH31_ORYSA Probable indole-3-acetic acid-amido synthetase GH3.1 (EC 6.3.2.-) (Auxin-responsive GH3-like protein 1) (OsGH3-1) - Oryza sativa (Rice)GH3 protein|OsGH3.13 - Probable indole-3-acetic acid-amido synthetase, expressed	-1.4
		17.1.1	hormone metabolism.abscisic acid.synthesis-degradation	os04g0550600	Transcript	highly similar to ( 571) AT2G44990 | Symbols: CCD7, MAX3, ATCCD7 | CCD7 (CAROTENOID CLEAVAGE DIOXYGENASE 7); 9-cis-epoxycarotenoid dioxygenase | chr2:18558938-18561621 FORWARD COG3670 RPE65 protein|carotenoid cleavage dioxygenase 7, chloroplast precursor, putative, expressed	-1.3
		17.1.1.1.1	hormone metabolism.abscisic acid.synthesis-degradation.synthesis.zeaxanthin epoxidase	os04g0448900	Transcript	highly similar to ( 716) AT5G67030 | Symbols: ABA1, LOS6, NPQ2, ATABA1, ZEP, IBS3, ATZEP | ABA1 (ABA DEFICIENT 1); zeaxanthin epoxidase | chr5:26754026-26757090 REVERSEhighly similar to ( 737) ABA2_NICPL Zeaxanthin epoxidase, chloroplast precursor (EC 1.14.13.90) - Nicotiana plumbaginifolia (Leadwort-leaved tobacco) PRK08163 UbiH PRK06753 PRK06847 PRK07538 PRK07236 PRK06475 protein|zeaxanthin epo…	-2.3
		17.1.1.1.10	hormone metabolism.abscisic acid.synthesis-degradation.synthesis.9-cis-epoxycarotenoid dioxygenase	os12g0617400	Transcript	highly similar to ( 712) AT1G78390 | Symbols: NCED9, ATNCED9 | NCED9 (NINE-CIS-EPOXYCAROTENOID DIOXYGENASE 9); 9-cis-epoxycarotenoid dioxygenase | chr1:29490895-29492868 REVERSE RPE65 COG3670 protein|9-cis-epoxycarotenoid dioxygenase 1, chloroplast precursor, putative, expressed	-2.8
		17.1.1.1.10	hormone metabolism.abscisic acid.synthesis-degradation.synthesis.9-cis-epoxycarotenoid dioxygenase	os07g0154100	Transcript	highly similar to ( 729) AT1G78390 | Symbols: NCED9, ATNCED9 | NCED9 (NINE-CIS-EPOXYCAROTENOID DIOXYGENASE 9); 9-cis-epoxycarotenoid dioxygenase | chr1:29490895-29492868 REVERSE RPE65 COG3670 protein|9-cis-epoxycarotenoid dioxygenase 1, chloroplast precursor, putative, expressed	-1.2
		17.1.2	hormone metabolism.abscisic acid.signal transduction	os01g0911700	Transcript	moderately similar to ( 234) AT3G24650 | Symbols: ABI3, SIS10 | ABI3 (ABA INSENSITIVE 3); DNA binding / basal transcription repressor/ transcription activator/ transcription factor | chr3:8997911-9000780 FORWARDhighly similar to ( 920) VIV_ORYSA Protein viviparous homolog - Oryza sativa (Rice) protein|B3 DNA binding domain containing protein, expressed	1.2
		17.1.2	hormone metabolism.abscisic acid.signal transduction	os09g0456200	Transcript	weakly similar to ( 115) AT3G19290 | Symbols: ABF4, AREB2 | ABF4 (ABRE BINDING FACTOR 4); DNA binding / protein binding / transcription activator/ transcription factor | chr3:6687956-6689713 FORWARD protein|bZIP transcription factor, putative, expressed	-1.7
		17.1.2	hormone metabolism.abscisic acid.signal transduction	os08g0101000	Transcript	weakly similar to ( 120) AT3G24650 | Symbols: ABI3, SIS10 | ABI3 (ABA INSENSITIVE 3); DNA binding / basal transcription repressor/ transcription activator/ transcription factor | chr3:8997911-9000780 FORWARDweakly similar to ( 111) VIV1_MAIZE Regulatory protein viviparous-1 - Zea mays (Maize) protein|B3 DNA binding domain containing protein, expressed	1.2
		17.1.2	hormone metabolism.abscisic acid.signal transduction	os06g0211200	Transcript	weakly similar to ( 117) AT4G34000 | Symbols: ABF3, DPBF5 | ABF3 (ABSCISIC ACID RESPONSIVE ELEMENTS-BINDING FACTOR 3); DNA binding / protein binding / transcription activator/ transcription factor | chr4:16296008-16297594 FORWARD protein|bZIP transcription factor, putative, expressed	-1.9
		17.3.1.2.1	hormone metabolism.brassinosteroid.synthesis-degradation.sterols.SMT1	os07g0206700	Transcript	highly similar to ( 563) AT5G13710 | Symbols: SMT1, CPH | SMT1 (STEROL METHYLTRANSFERASE 1); sterol 24-C-methyltransferase | chr5:4424048-4426866 REVERSEhighly similar to ( 694) SMT1_ORYSA Cycloartenol-C-24-methyltransferase 1 (EC 2.1.1.41) (24-sterol C-methyltransferase 1) (Sterol C-methyltransferase 1) - Oryza sativa (Rice) Sterol_MT_C Methyltransf_11 UbiE ubiE Cfa protein|cycloartenol-C-24-met…	1.3
		17.3.1.2.3	hormone metabolism.brassinosteroid.synthesis-degradation.sterols.CYP51	os05g0211100	Transcript	moderately similar to ( 483) AT1G11680 | Symbols: CYP51G1, EMB1738, CYP51A2, CYP51 | CYP51G1 (CYTOCHROME P450 51G1); oxygen binding / sterol 14-demethylase | chr1:3938925-3940585 FORWARDmoderately similar to ( 486) CP51_SORBI Cytochrome P450 51 (EC 1.14.13.70) (CYPLI) (P450-LIA1) (Obtusifoliol 14-alpha demethylase) - Sorghum bicolor (Sorghum) (Sorghum vulgare) p450 CypX protein|cytochrome P450 51…	1.3
		17.3.1.2.6	hormone metabolism.brassinosteroid.synthesis-degradation.sterols.DWF7	os01g0134500	Transcript	moderately similar to ( 387) AT3G02580 | Symbols: STE1, DWF7, BUL1 | STE1 (STEROL 1); C-5 sterol desaturase | chr3:547048-548615 FORWARDmoderately similar to ( 387) SC5D_TOBAC Delta(7)-sterol-C5(6)-desaturase (EC 1.3.3.-) (Delta-7-C-5 sterol desaturase) (Delta(7)-sterol-C5-desaturase) - Nicotiana tabacum (Common tobacco) protein|fatty acid hydroxylase, putative, expressed	2
		17.3.1.2.8	hormone metabolism.brassinosteroid.synthesis-degradation.sterols.DWF1	os10g0397400	Transcript	highly similar to ( 936) AT3G19820 | Symbols: DWF1, DIM, EVE1, DIM1, CBB1 | DWF1 (DWARF 1); calmodulin binding / catalytic | chr3:6879835-6881616 REVERSEhighly similar to ( 920) DIM_PEA Cell elongation protein diminuto - Pisum sativum (Garden pea) GlcD protein|FAD-linked oxidoreductase protein, putative, expressed	-2.6
		17.3.2.2	hormone metabolism.brassinosteroid.signal transduction.BZR	os01g0176900	Transcript	DUF822 protein|BRASSINAZOLE-RESISTANT 2, putative, expressed	-4.1
		17.3.3	hormone metabolism.brassinosteroid.induced-regulated-responsive-activated	os09g0279600	Transcript	highly similar to ( 979) AT3G20780 | Symbols: ATTOP6B, BIN3, HYP6, RHL3 | ATTOP6B (topoisomerase 6 subunit B); DNA topoisomerase (ATP-hydrolyzing)/ identical protein binding / protein binding | chr3:7264025-7268498 REVERSEPRK04184 COG1389 Topo-VIb_trans TopoIIB_Trans protein|OsTOP6B - Topoisomerase 6 subunit B, expressed	-1.4
		17.5.1	hormone metabolism.ethylene.synthesis-degradation	os04g0522500	Transcript	moderately similar to ( 340) AT4G21200 | Symbols: ATGA2OX8, GA2OX8 | GA2OX8 (GIBBERELLIN 2-OXIDASE 8); gibberellin 2-beta-dioxygenase | chr4:11302751-11304032 FORWARDweakly similar to ( 138) GAO1D_WHEAT Gibberellin 20 oxidase 1-D (EC 1.14.11.-) (Gibberellin C-20 oxidase 1-D) (GA 20-oxidase 1-D) (Ta20ox1D) (TaGA20ox1-D) (Protein Wga20) - Triticum aestivum (Wheat) PcbC 2OG-FeII_Oxy protein|gibberel…	-3
		17.5.1	hormone metabolism.ethylene.synthesis-degradation	os02g0630300	Transcript	moderately similar to ( 309) AT4G21200 | Symbols: ATGA2OX8, GA2OX8 | GA2OX8 (GIBBERELLIN 2-OXIDASE 8); gibberellin 2-beta-dioxygenase | chr4:11302751-11304032 FORWARDweakly similar to ( 122) GAO1D_WHEAT Gibberellin 20 oxidase 1-D (EC 1.14.11.-) (Gibberellin C-20 oxidase 1-D) (GA 20-oxidase 1-D) (Ta20ox1D) (TaGA20ox1-D) (Protein Wga20) - Triticum aestivum (Wheat) PcbC 2OG-FeII_Oxy protein|gibberel…	3
		17.5.1	hormone metabolism.ethylene.synthesis-degradation	os08g0560000	Transcript	moderately similar to ( 376) AT2G36690 | Symbols: | oxidoreductase, 2OG-Fe(II) oxygenase family protein | chr2:15379930-15381987 FORWARDweakly similar to ( 154) FL3H_MALDO Naringenin,2-oxoglutarate 3-dioxygenase (EC 1.14.11.9) (Flavonone-3-hydroxylase) (F3H) (FHT) - Malus domestica (Apple) (Malus sylvestris) PcbC 2OG-FeII_Oxy protein|gibberellin 20 oxidase 2, putative, expressed	1.2
		17.5.1	hormone metabolism.ethylene.synthesis-degradation	os09g0451000	Transcript	moderately similar to ( 400) AT1G05010 | Symbols: EFE, ACO4, EAT1 | EFE (ETHYLENE-FORMING ENZYME); 1-aminocyclopropane-1-carboxylate oxidase | chr1:1431419-1432695 REVERSEhighly similar to ( 568) ACCO1_ORYSA 1-aminocyclopropane-1-carboxylate oxidase 1 (EC 1.14.17.4) (ACC oxidase 1) (Ethylene-forming enzyme) (EFE) - Oryza sativa (Rice) PcbC 2OG-FeII_Oxy protein|1-aminocyclopropane-1-carboxylate ox…	-1.4
		17.5.1	hormone metabolism.ethylene.synthesis-degradation	os01g0757200	Transcript	moderately similar to ( 341) AT1G30040 | Symbols: ATGA2OX2 | ATGA2OX2 (GIBBERELLIN 2-OXIDASE); gibberellin 2-beta-dioxygenase | chr1:10537769-10538781 FORWARDmoderately similar to ( 354) G2OX1_PEA Gibberellin 2-beta-dioxygenase 1 (EC 1.14.11.13) (Gibberellin 2-beta-hydroxylase 1) (Gibberellin 2-oxidase 1) (GA 2-oxidase 1) (Protein SLENDER) - Pisum sativum (Garden pea) PcbC 2OG-FeII_Oxy protein|gi…	1.5
		17.5.1	hormone metabolism.ethylene.synthesis-degradation	os09g0570800	Transcript	moderately similar to ( 306) AT2G36690 | Symbols: | oxidoreductase, 2OG-Fe(II) oxygenase family protein | chr2:15379930-15381987 FORWARDweakly similar to ( 138) FL3H_MALDO Naringenin,2-oxoglutarate 3-dioxygenase (EC 1.14.11.9) (Flavonone-3-hydroxylase) (F3H) (FHT) - Malus domestica (Apple) (Malus sylvestris) PcbC 2OG-FeII_Oxy protein|1-aminocyclopropane-1-carboxylate oxidase, putative, expressed	2.5
		17.5.1	hormone metabolism.ethylene.synthesis-degradation	os10g0558900	Transcript	weakly similar to ( 155) AT1G78550 | Symbols: | oxidoreductase, 2OG-Fe(II) oxygenase family protein | chr1:29545031-29546360 REVERSEweakly similar to ( 115) ACCO1_ORYSA 1-aminocyclopropane-1-carboxylate oxidase 1 (EC 1.14.17.4) (ACC oxidase 1) (Ethylene-forming enzyme) (EFE) - Oryza sativa (Rice) 2OG-FeII_Oxy PcbC protein|oxidoreductase, 2OG-Fe oxygenase family protein, putative, expressed	1.6
		17.5.1	hormone metabolism.ethylene.synthesis-degradation	os07g0103500	Transcript	moderately similar to ( 296) AT4G21200 | Symbols: ATGA2OX8, GA2OX8 | GA2OX8 (GIBBERELLIN 2-OXIDASE 8); gibberellin 2-beta-dioxygenase | chr4:11302751-11304032 FORWARDweakly similar to ( 140) GAO1B_WHEAT Gibberellin 20 oxidase 1-B (EC 1.14.11.-) (Gibberellin C-20 oxidase 1-B) (GA 20-oxidase 1-B) (Ta20ox1B) (TaGA20ox1-B) - Triticum aestivum (Wheat) PcbC 2OG-FeII_Oxy protein|gibberellin 2-beta-dioxy…	3.1
		17.5.1.1	hormone metabolism.ethylene.synthesis-degradation.1-aminocyclopropane-1-carboxylate synthase	os04g0578000	Transcript	highly similar to ( 611) AT4G11280 | Symbols: ACS6 | ACS6 (1-AMINOCYCLOPROPANE-1-CARBOXYLIC ACID (ACC) SYNTHASE 6); 1-aminocyclopropane-1-carboxylate synthase | chr4:6864168-6865922 FORWARDhighly similar to ( 630) 1A1C_SOYBN 1-aminocyclopropane-1-carboxylate synthase (EC 4.4.1.14) (ACC synthase) (S-adenosyl-L-methionine methylthioadenosine-lyase) - Glycine max (Soybean) Aminotran_1_2 COG0436 PRK0…	-1.3
		17.5.1.1	hormone metabolism.ethylene.synthesis-degradation.1-aminocyclopropane-1-carboxylate synthase	os06g0130400	Transcript	highly similar to ( 522) AT5G51690 | Symbols: ACS12 | ACS12; 1-aminocyclopropane-1-carboxylate synthase/ L-aspartate:2-oxoglutarate aminotransferase/ aromatic-amino-acid:2-oxoglutarate aminotransferase | chr5:20999015-21000957 REVERSEmoderately similar to ( 405) 1A12_CUCMA 1-aminocyclopropane-1-carboxylate synthase CMA101 (EC 4.4.1.14) (ACC synthase) (S-adenosyl-L-methionine methylthioadenosine-l…	-1.3
		17.5.1.1	hormone metabolism.ethylene.synthesis-degradation.1-aminocyclopropane-1-carboxylate synthase	os03g0727600	Transcript	highly similar to ( 649) AT4G37770 | Symbols: ACS8 | ACS8; 1-aminocyclopropane-1-carboxylate synthase | chr4:17752222-17753925 FORWARDhighly similar to ( 947) 1A11_ORYSA 1-aminocyclopropane-1-carboxylate synthase 1 (EC 4.4.1.14) (ACC synthase 1) (S-adenosyl-L-methionine methylthioadenosine-lyase 1) - Oryza sativa (Rice) Aminotran_1_2 COG0436 PRK06108 ARO8 PRK06056 PRK07568 PRK05794 PRK07682 PRK07…	-1.4
		17.5.1.1	hormone metabolism.ethylene.synthesis-degradation.1-aminocyclopropane-1-carboxylate synthase	os01g0192900	Transcript	highly similar to ( 563) AT4G26200 | Symbols: ACS7, ATACS7 | ACS7; 1-aminocyclopropane-1-carboxylate synthase | chr4:13275307-13276946 FORWARDmoderately similar to ( 483) 1A12_CUCMA 1-aminocyclopropane-1-carboxylate synthase CMA101 (EC 4.4.1.14) (ACC synthase) (S-adenosyl-L-methionine methylthioadenosine-lyase) - Cucurbita maxima (Pumpkin) (Winter squash) Aminotran_1_2 COG0436 PRK05794 ARO8 PRK07…	1
		17.5.2	hormone metabolism.ethylene.signal transduction	os04g0169100	Transcript	highly similar to ( 661) AT3G04580 | Symbols: EIN4 | EIN4 (ETHYLENE INSENSITIVE 4); ethylene binding / glycogen synthase kinase 3/ protein histidine kinase/ receptor | chr3:1235576-1237965 REVERSEmoderately similar to ( 479) ETR1_BRAOL Ethylene receptor (EC 2.7.13.3) - Brassica oleracea (Wild cabbage) PRK11091 PRK11466 PRK09959 protein|ethylene receptor, putative, expressed	2.8
		17.5.2	hormone metabolism.ethylene.signal transduction	os01g0131600	Transcript	protein|AP2 domain containing protein, expressed	2.7
		17.5.2	hormone metabolism.ethylene.signal transduction	os02g0654700	Transcript	weakly similar to ( 134) AT4G17500 | Symbols: ATERF-1 | ATERF-1 (ETHYLENE RESPONSIVE ELEMENT BINDING FACTOR 1); DNA binding / transcription activator/ transcription factor | chr4:9759405-9760211 FORWARDweakly similar to ( 131) ERF2_NICSY Ethylene-responsive transcription factor 2 (Ethylene-responsive element-binding factor 2) (EREBP-2) (NsERF2) - Nicotiana sylvestris (Wood tobacco)AP2 AP2 protein…	-1.2
		17.5.2	hormone metabolism.ethylene.signal transduction	os10g0390800	Transcript	AP2 AP2 protein|AP2 domain containing protein, expressed	2.7
		17.5.2	hormone metabolism.ethylene.signal transduction	os09g0457900	Transcript	very weakly similar to (82.8) AT4G34410 | Symbols: RRTF1 | RRTF1 ({REDOX RESPONSIVE TRANSCRIPTION FACTOR 1); DNA binding / transcription factor | chr4:16451992-16452798 FORWARDAP2 AP2 protein|AP2 domain containing protein, expressed	4.7
		17.5.2	hormone metabolism.ethylene.signal transduction	os04g0610400	Transcript	very weakly similar to (81.3) ERF4_TOBAC Ethylene-responsive transcription factor 4 (Ethylene-responsive element-binding factor 4 homolog) (EREBP-3) (NtERF3) - Nicotiana tabacum (Common tobacco)AP2 AP2 protein|AP2 domain containing protein, expressed	1.1
		17.5.2	hormone metabolism.ethylene.signal transduction	os06g0604000	Transcript	weakly similar to ( 162) AT1G15360 | Symbols: SHN1, WIN1 | SHN1 (SHINE 1); DNA binding / sequence-specific DNA binding / transcription factor | chr1:5283609-5284506 FORWARDAP2 AP2 protein|AP2 domain containing protein, expressed	1.8
		17.5.2	hormone metabolism.ethylene.signal transduction	os10g0562900	Transcript	very weakly similar to (97.1) AT5G51190 | Symbols: | AP2 domain-containing transcription factor, putative | chr5:20800708-20801373 REVERSEvery weakly similar to (94.7) ERF5_TOBAC Ethylene-responsive transcription factor 5 (Ethylene-responsive element-binding factor 5 homolog) (EREBP-4) (NtERF4) - Nicotiana tabacum (Common tobacco)AP2 AP2 protein|AP2 domain containing protein, expressed	-1.6
		17.5.2	hormone metabolism.ethylene.signal transduction	os09g0522000	Transcript	protein|dehydration-responsive element-binding protein, putative, expressed	-5.5
		17.4.1	hormone metabolism.cytokinin.synthesis-degradation	os01g0775400	Transcript	highly similar to ( 658) AT1G75450 | Symbols: CKX5, ATCKX5, ATCKX6 | CKX5 (CYTOKININ OXIDASE 5); cytokinin dehydrogenase | chr1:28315248-28318064 REVERSEmoderately similar to ( 427) CKX1_MAIZE Cytokinin dehydrogenase 1 precursor (EC 1.5.99.12) (Cytokinin oxidase 1) (CKO 1) (COX 1) (ZmCKX1) - Zea mays (Maize) Cytokin-bind GlcD FAD_binding_4 protein|cytokinin dehydrogenase precursor, putative, expr…	4.3
		17.4.1	hormone metabolism.cytokinin.synthesis-degradation	os01g0197700	Transcript	moderately similar to ( 392) AT5G56970 | Symbols: CKX3, ATCKX3 | CKX3 (CYTOKININ OXIDASE 3); amine oxidase/ cytokinin dehydrogenase | chr5:23044944-23048245 REVERSEmoderately similar to ( 429) CKX1_MAIZE Cytokinin dehydrogenase 1 precursor (EC 1.5.99.12) (Cytokinin oxidase 1) (CKO 1) (COX 1) (ZmCKX1) - Zea mays (Maize) Cytokin-bind GlcD FAD_binding_4 protein|cytokinin dehydrogenase precursor, put…	-3.8
		17.4.1	hormone metabolism.cytokinin.synthesis-degradation	os05g0311801	Transcript	moderately similar to ( 259) AT3G63110 | Symbols: ATIPT3, IPT3 | ATIPT3 (ARABIDOPSIS THALIANA ISOPENTENYLTRANSFERASE 3); ATP binding / tRNA isopentenyltransferase/ transferase, transferring alkyl or aryl (other than methyl) groups | chr3:23318437-23319447 REVERSE miaA MiaA IPPT protein|IPP transferase, putative, expressed	1.3
		17.4.1	hormone metabolism.cytokinin.synthesis-degradation	os10g0483500	Transcript	moderately similar to ( 398) AT3G63440 | Symbols: ATCKX6, CKX6, ATCKX7 | CKX6 (CYTOKININ OXIDASE/DEHYDROGENASE 6); cytokinin dehydrogenase | chr3:23424291-23426265 FORWARDmoderately similar to ( 340) CKX1_MAIZE Cytokinin dehydrogenase 1 precursor (EC 1.5.99.12) (Cytokinin oxidase 1) (CKO 1) (COX 1) (ZmCKX1) - Zea mays (Maize) Cytokin-bind GlcD FAD_binding_4 protein|cytokinin dehydrogenase precurs…	2
		17.4.1	hormone metabolism.cytokinin.synthesis-degradation	os05g0551700	Transcript	moderately similar to ( 230) AT1G68460 | Symbols: ATIPT1 | ATIPT1 (isopentenyltransferase 1); adenylate dimethylallyltransferase | chr1:25668976-25670049 REVERSE MiaA miaA IPPT protein|IPP transferase, putative, expressed	-4.3
		17.4.1	hormone metabolism.cytokinin.synthesis-degradation	os01g0940000	Transcript	highly similar to ( 656) AT2G41510 | Symbols: ATCKX1, CKX1 | CKX1 (CYTOKININ OXIDASE/DEHYDROGENASE 1); cytokinin dehydrogenase | chr2:17314626-17316861 FORWARDmoderately similar to ( 416) CKX1_MAIZE Cytokinin dehydrogenase 1 precursor (EC 1.5.99.12) (Cytokinin oxidase 1) (CKO 1) (COX 1) (ZmCKX1) - Zea mays (Maize) Cytokin-bind GlcD FAD_binding_4 protein|cytokinin dehydrogenase precursor, putative…	-1.2
		17.7.1.2	hormone metabolism.jasmonate.synthesis-degradation.lipoxygenase	os08g0508800	Transcript	highly similar to ( 845) AT3G45140 | Symbols: LOX2, ATLOX2 | LOX2 (LIPOXYGENASE 2); lipoxygenase | chr3:16525437-16529233 FORWARDnearly identical (1623) LOXC1_ORYSA Lipoxygenase 7, chloroplast precursor (EC 1.13.11.12) - Oryza sativa (Rice)Lipoxygenase PLAT_LH2 LH2 protein|lipoxygenase, chloroplast precursor, putative, expressed	4
		17.7.1.2	hormone metabolism.jasmonate.synthesis-degradation.lipoxygenase	os04g0447100	Transcript	highly similar to ( 758) AT1G17420 | Symbols: LOX3 | LOX3; electron carrier/ iron ion binding / lipoxygenase/ metal ion binding / oxidoreductase, acting on single donors with incorporation of molecular oxygen, incorporation of two atoms of oxygen | chr1:5977512-5981384 FORWARDnearly identical (1178) LOX5_ORYSA Putative lipoxygenase 5 (EC 1.13.11.12) - Oryza sativa (Rice)Lipoxygenase PLAT_LH2 LH2 …	-1.5
		17.7.1.2	hormone metabolism.jasmonate.synthesis-degradation.lipoxygenase	os03g0738600	Transcript	highly similar to ( 967) AT1G55020 | Symbols: LOX1 | LOX1; lipoxygenase | chr1:20525798-20530143 FORWARDnearly identical (1704) LOX2_ORYSA Lipoxygenase 2 (EC 1.13.11.12) (Lipoxygenase L-2) - Oryza sativa (Rice)Lipoxygenase PLAT_LH2 PLAT LH2 protein|lipoxygenase, putative, expressed	1.9
		17.7.1.2	hormone metabolism.jasmonate.synthesis-degradation.lipoxygenase	os03g0700700	Transcript	highly similar to ( 648) AT3G22400 | Symbols: LOX5 | LOX5; electron carrier/ iron ion binding / lipoxygenase/ metal ion binding / oxidoreductase, acting on single donors with incorporation of molecular oxygen, incorporation of two atoms of oxygen | chr3:7927011-7931167 FORWARDhighly similar to ( 959) LOX4_ORYSA Probable lipoxygenase 4 (EC 1.13.11.12) - Oryza sativa (Rice)Lipoxygenase protein|lipo…	2.1
		17.7.1.3	hormone metabolism.jasmonate.synthesis-degradation.allene oxidase synthase	os02g0218800	Transcript	moderately similar to ( 423) AT5G42650 | Symbols: AOS, CYP74A, DDE2 | AOS (ALLENE OXIDE SYNTHASE); allene oxide synthase/ hydro-lyase/ oxygen binding | chr5:17097803-17099359 REVERSEhighly similar to ( 935) C74A4_ORYSA Cytochrome P450 74A4 (EC 4.2.1.92) (Allene oxide synthase 4) (Hydroperoxide dehydrase 4) - Oryza sativa (Rice) protein|cytochrome P450, putative, expressed	1.9
		17.7.1.3	hormone metabolism.jasmonate.synthesis-degradation.allene oxidase synthase	os03g0225900	Transcript	moderately similar to ( 424) AT5G42650 | Symbols: AOS, CYP74A, DDE2 | AOS (ALLENE OXIDE SYNTHASE); allene oxide synthase/ hydro-lyase/ oxygen binding | chr5:17097803-17099359 REVERSEhighly similar to ( 791) C74A2_ORYSA Cytochrome P450 74A2 (EC 4.2.1.92) (Allene oxide synthase 2) (Hydroperoxide dehydrase 2) - Oryza sativa (Rice) protein|cytochrome P450, putative, expressed	-2.8
		17.7.1.3	hormone metabolism.jasmonate.synthesis-degradation.allene oxidase synthase	os02g0218700	Transcript	moderately similar to ( 386) AT5G42650 | Symbols: AOS, CYP74A, DDE2 | AOS (ALLENE OXIDE SYNTHASE); allene oxide synthase/ hydro-lyase/ oxygen binding | chr5:17097803-17099359 REVERSEhighly similar to ( 870) C74A3_ORYSA Cytochrome P450 74A3 (EC 4.2.1.92) (Allene oxide synthase 3) (Hydroperoxide dehydrase 3) - Oryza sativa (Rice) protein|cytochrome P450, putative, expressed	-2.9
		17.6.1.11	hormone metabolism.gibberelin.synthesis-degradation.GA20 oxidase	os03g0856700	Transcript	moderately similar to ( 434) AT4G25420 | Symbols: GA5, GA20OX1, AT2301, ATGA20OX1 | GA20OX1; gibberellin 20-oxidase | chr4:12990982-12992409 REVERSEhighly similar to ( 712) GAOX1_ORYSA Gibberellin 20 oxidase 1 (EC 1.14.11.-) (Gibberellin C-20 oxidase 1) (GA 20-oxidase 1) (Os20ox) - Oryza sativa (Rice) PcbC 2OG-FeII_Oxy protein|gibberellin 20 oxidase 1, putative, expressed	1.9
		17.6.1.11	hormone metabolism.gibberelin.synthesis-degradation.GA20 oxidase	os01g0883800	Transcript	moderately similar to ( 369) AT4G25420 | Symbols: GA5, GA20OX1, AT2301, ATGA20OX1 | GA20OX1; gibberellin 20-oxidase | chr4:12990982-12992409 REVERSEhighly similar to ( 655) GAOX2_ORYSA Gibberellin 20 oxidase 2 (EC 1.14.11.-) (Gibberellin C-20 oxidase 2) (GA 20-oxidase 2) (Os20ox2) (Semidwarf-1 protein) - Oryza sativa (Rice) PcbC 2OG-FeII_Oxy protein|gibberellin 20 oxidase 2, putative, expressed	1.7
		17.6.1.11	hormone metabolism.gibberelin.synthesis-degradation.GA20 oxidase	os01g0177400	Transcript	weakly similar to ( 168) AT1G80330 | Symbols: ATGA3OX4, GA3OX4 | GA3OX4 (GIBBERELLIN 3-OXIDASE 4); gibberellin 3-beta-dioxygenase | chr1:30198061-30199537 REVERSEmoderately similar to ( 404) G3O22_WHEAT Gibberellin 3-beta-dioxygenase 2-2 (EC 1.14.11.15) (Gibberellin 3 beta-hydroxylase 2-2) (Gibberellin 3-oxidase 2-2) - Triticum aestivum (Wheat) PcbC 2OG-FeII_Oxy protein|gibberellin 3-beta-dioxyge…	-1.9
		17.6.1.12	hormone metabolism.gibberelin.synthesis-degradation.GA3 oxidase	os01g0177400	Transcript	weakly similar to ( 168) AT1G80330 | Symbols: ATGA3OX4, GA3OX4 | GA3OX4 (GIBBERELLIN 3-OXIDASE 4); gibberellin 3-beta-dioxygenase | chr1:30198061-30199537 REVERSEmoderately similar to ( 404) G3O22_WHEAT Gibberellin 3-beta-dioxygenase 2-2 (EC 1.14.11.15) (Gibberellin 3 beta-hydroxylase 2-2) (Gibberellin 3-oxidase 2-2) - Triticum aestivum (Wheat) PcbC 2OG-FeII_Oxy protein|gibberellin 3-beta-dioxyge…	-1.9
		17.6.1.13	hormone metabolism.gibberelin.synthesis-degradation.GA2 oxidase	os05g0514600	Transcript	moderately similar to ( 289) AT1G78440 | Symbols: ATGA2OX1 | ATGA2OX1 (gibberellin 2-oxidase 1); gibberellin 2-beta-dioxygenase | chr1:29511772-29512990 REVERSEmoderately similar to ( 307) G2OX1_PEA Gibberellin 2-beta-dioxygenase 1 (EC 1.14.11.13) (Gibberellin 2-beta-hydroxylase 1) (Gibberellin 2-oxidase 1) (GA 2-oxidase 1) (Protein SLENDER) - Pisum sativum (Garden pea) PcbC 2OG-FeII_Oxy protein|…	2.8
		17.6.3	hormone metabolism.gibberelin.induced-regulated-responsive-activated	os03g0760800	Transcript	protein|GASR3 - Gibberellin-regulated GASA/GAST/Snakin family protein precursor, expressed	1.1
		30.2.3	signalling.receptor kinases.leucine rich repeat III	os01g0223600	Transcript	highly similar to ( 575) AT4G23740 | Symbols: | leucine-rich repeat transmembrane protein kinase, putative | chr4:12367063-12369159 FORWARDweakly similar to ( 189) PSKR_DAUCA Phytosulfokine receptor precursor (EC 2.7.11.1) (Phytosulfokine LRR receptor kinase) - Daucus carota (Carrot) PTKc Pkinase_Tyr S_TKc TyrKc Pkinase S_TKc PTKc_Jak_rpt2 SPS1 PTKc_Frk_like PTKc_Src_like PTKc_EphR PTKc_Fyn_Yrk P…	-1.3
		30.2.3	signalling.receptor kinases.leucine rich repeat III	os07g0568700	Transcript	moderately similar to ( 211) AT5G06860 | Symbols: PGIP1, ATPGIP1 | PGIP1 (POLYGALACTURONASE INHIBITING PROTEIN 1); protein binding | chr5:2132373-2133434 FORWARDhighly similar to ( 610) PGIP1_ORYSA Polygalacturonase inhibitor 1 precursor (Polygalacturonase-inhibiting protein) (Floral organ regulator 1) - Oryza sativa (Rice) protein|polygalacturonase inhibitor 1 precursor, putative, expressed	1.1
		30.2.11	signalling.receptor kinases.leucine rich repeat XI	os01g0718300	Transcript	nearly identical (1118) AT4G39400 | Symbols: BRI1, CBB2, DWF2, BIN1, ATBRI1 | BRI1 (BRASSINOSTEROID INSENSITIVE 1); kinase/ protein binding / protein heterodimerization/ protein homodimerization/ protein kinase/ protein serine/threonine kinase | chr4:18324826-18328416 FORWARDmoderately similar to ( 450) PSKR_DAUCA Phytosulfokine receptor precursor (EC 2.7.11.1) (Phytosulfokine LRR receptor kinase…	1.7
		30.2.11	signalling.receptor kinases.leucine rich repeat XI	os06g0130100	Transcript	nearly identical (1240) AT5G62230 | Symbols: ERL1 | ERL1 (ERECTA-LIKE 1); kinase | chr5:24996433-25002130 FORWARDmoderately similar to ( 332) PSKR_DAUCA Phytosulfokine receptor precursor (EC 2.7.11.1) (Phytosulfokine LRR receptor kinase) - Daucus carota (Carrot) S_TKc S_TKc Pkinase_Tyr Pkinase TyrKc PTKc PTKc_Jak_rpt2 PTKc_Csk_like PTKc_Trk SPS1 PTKc_Src_like PTKc_Itk PTKc_Srm_Brk PTKc_Jak2_Jak3_…	2.7
		30.2.11	signalling.receptor kinases.leucine rich repeat XI	os11g0233800	Transcript	highly similar to ( 859) AT5G65700 | Symbols: BAM1 | BAM1 (BARELY ANY MERISTEM 1); ATP binding / kinase/ protein serine/threonine kinase | chr5:26281826-26284945 FORWARDmoderately similar to ( 227) RPK1_IPONI Receptor-like protein kinase precursor (EC 2.7.11.1) - Ipomoea nil (Japanese morning glory) (Pharbitis nil) S_TKc Pkinase_Tyr Pkinase S_TKc PTKc TyrKc SPS1 PTKc_Jak_rpt2 PTKc_Src_like PTKc_S…	3.8
		30.2.11	signalling.receptor kinases.leucine rich repeat XI	os06g0717200	Transcript	highly similar to ( 931) AT1G75820 | Symbols: CLV1, FAS3, FLO5 | CLV1 (CLAVATA 1); ATP binding / kinase/ protein serine/threonine kinase/ receptor signaling protein serine/threonine kinase | chr1:28463631-28466652 REVERSEmoderately similar to ( 244) RPK1_IPONI Receptor-like protein kinase precursor (EC 2.7.11.1) - Ipomoea nil (Japanese morning glory) (Pharbitis nil) Pkinase_Tyr S_TKc S_TKc Pkinas…	-1
		30.2.11	signalling.receptor kinases.leucine rich repeat XI	os11g0559200	Transcript	highly similar to ( 607) AT3G47090 | Symbols: | leucine-rich repeat transmembrane protein kinase, putative | chr3:17341512-17344645 REVERSEmoderately similar to ( 310) RPK1_IPONI Receptor-like protein kinase precursor (EC 2.7.11.1) - Ipomoea nil (Japanese morning glory) (Pharbitis nil) S_TKc Pkinase_Tyr PTKc Pkinase S_TKc TyrKc PTKc_Frk_like PTKc_Src_like PTKc_Jak_rpt2 PTKc_Srm_Brk PTKc_Axl_like …	-1.8
		30.2.12	signalling.receptor kinases.leucine rich repeat XII	os11g0559200	Transcript	highly similar to ( 607) AT3G47090 | Symbols: | leucine-rich repeat transmembrane protein kinase, putative | chr3:17341512-17344645 REVERSEmoderately similar to ( 310) RPK1_IPONI Receptor-like protein kinase precursor (EC 2.7.11.1) - Ipomoea nil (Japanese morning glory) (Pharbitis nil) S_TKc Pkinase_Tyr PTKc Pkinase S_TKc TyrKc PTKc_Frk_like PTKc_Src_like PTKc_Jak_rpt2 PTKc_Srm_Brk PTKc_Axl_like …	-1.8
		30.2.16	signalling.receptor kinases.Catharanthus roseus-like RLK1	os01g0769700	Transcript	nearly identical (1103) AT3G51550 | Symbols: FER | FER (FERONIA); kinase/ protein kinase | chr3:19117877-19120564 REVERSEmoderately similar to ( 255) NORK_MEDTR Nodulation receptor kinase precursor (EC 2.7.11.1) (Does not make infections protein 2) (Symbiosis receptor-like kinase) (MtSYMRK) - Medicago truncatula (Barrel medic) PTKc TyrKc Pkinase_Tyr S_TKc S_TKc Pkinase PTKc_Jak_rpt2 PTKc_Trk PTK_…	1.7
		30.2.22	signalling.receptor kinases.proline extensin like	os05g0589700	Transcript	moderately similar to ( 475) AT3G13690 | Symbols: | protein kinase family protein | chr3:4486920-4490011 FORWARDvery weakly similar to (92.8) NORK_PEA Nodulation receptor kinase precursor (EC 2.7.11.1) - Pisum sativum (Garden pea) protein|protein kinase family protein, putative, expressed	3.2
		30.2.24	signalling.receptor kinases.S-locus glycoprotein like	os04g0632100	Transcript	highly similar to ( 582) AT4G21390 | Symbols: B120 | B120; ATP binding / protein kinase/ protein serine/threonine kinase/ sugar binding | chr4:11394458-11397474 REVERSEmoderately similar to ( 222) SLSG3_BRAOL S-locus-specific glycoprotein S13 precursor (SLSG-13) (Fragment) - Brassica oleracea (Wild cabbage) TyrKc Pkinase_Tyr PTKc Pkinase S_TKc S_TKc PTKc_Src_like PTKc_Frk_like PTKc_Jak_rpt2 PTKc_…	-2.8
		30.2.24	signalling.receptor kinases.S-locus glycoprotein like	os04g0634500	Transcript	moderately similar to ( 295) AT4G23140 | Symbols: CRK6 | CRK6 (CYSTEINE-RICH RLK 6); kinase | chr4:12121397-12124037 FORWARDweakly similar to ( 132) NORK_MEDTR Nodulation receptor kinase precursor (EC 2.7.11.1) (Does not make infections protein 2) (Symbiosis receptor-like kinase) (MtSYMRK) - Medicago truncatula (Barrel medic) S_TKc TyrKc S_TKc Pkinase_Tyr Pkinase PTKc PTKc_Jak_rpt2 PTKc_Srm_Brk p…	1.7
		30.2.24	signalling.receptor kinases.S-locus glycoprotein like	os01g0114300	Transcript	moderately similar to ( 327) AT5G38280 | Symbols: PR5K | PR5K; kinase/ transmembrane receptor protein serine/threonine kinase | chr5:15293325-15295838 REVERSEweakly similar to ( 200) KPRO_MAIZE Putative receptor protein kinase ZmPK1 precursor (EC 2.7.11.1) - Zea mays (Maize) Pkinase_Tyr TyrKc PTKc Pkinase S_TKc S_TKc PTKc_EGFR_like PTKc_Csk_like PTKc_Src_like PTKc_Syk_like PTKc_Abl PTKc_Jak_rpt2 …	-1.3
		30.2.24	signalling.receptor kinases.S-locus glycoprotein like	os04g0619400	Transcript	moderately similar to ( 461) AT1G16670 | Symbols: | protein kinase family protein | chr1:5697846-5699492 FORWARDmoderately similar to ( 228) NORK_PEA Nodulation receptor kinase precursor (EC 2.7.11.1) - Pisum sativum (Garden pea) TyrKc PTKc Pkinase_Tyr S_TKc Pkinase S_TKc PTKc_Src_like PTKc_Srm_Brk PTKc_Csk_like PTKc_Frk_like PTKc_EphR PTKc_Src PTKc_Lck_Blk PTKc_Fyn_Yrk PTKc_Jak_rpt2 PTKc_Trk PTK…	1.4
		30.2.24	signalling.receptor kinases.S-locus glycoprotein like	os06g0690200	Transcript	moderately similar to ( 290) AT4G23180 | Symbols: CRK10, RLK4 | CRK10 (CYSTEINE-RICH RLK10); ATP binding / kinase/ protein kinase/ protein serine/threonine kinase/ protein tyrosine kinase | chr4:12138171-12140780 FORWARDweakly similar to ( 181) PSKR_DAUCA Phytosulfokine receptor precursor (EC 2.7.11.1) (Phytosulfokine LRR receptor kinase) - Daucus carota (Carrot) S_TKc Pkinase S_TKc Pkinase_Tyr T…	-1.8
		30.2.24	signalling.receptor kinases.S-locus glycoprotein like	os04g0631800	Transcript	highly similar to ( 649) AT4G21390 | Symbols: B120 | B120; ATP binding / protein kinase/ protein serine/threonine kinase/ sugar binding | chr4:11394458-11397474 REVERSEmoderately similar to ( 251) KPRO_MAIZE Putative receptor protein kinase ZmPK1 precursor (EC 2.7.11.1) - Zea mays (Maize) TyrKc PTKc Pkinase_Tyr S_TKc Pkinase S_TKc PTKc_Jak_rpt2 PTKc_Frk_like PTKc_Src_like PTKc_Srm_Brk PTKc_Ror PT…	-1.2
		30.2.24	signalling.receptor kinases.S-locus glycoprotein like	os07g0186200	Transcript	highly similar to ( 523) AT2G19130 | Symbols: | S-locus lectin protein kinase family protein | chr2:8293789-8296275 FORWARDmoderately similar to ( 221) KPRO_MAIZE Putative receptor protein kinase ZmPK1 precursor (EC 2.7.11.1) - Zea mays (Maize) Pkinase S_TKc TyrKc Pkinase_Tyr S_TKc PTKc PTKc_Csk_like PTKc_Frk_like PTKc_Itk PTKc_Src_like SPS1 PTKc_EphR PTKc_Srm_Brk PTKc_Tec_like PTKc_Abl PTKc_Trk …	1.3
		30.2.24	signalling.receptor kinases.S-locus glycoprotein like	os01g0114100	Transcript	moderately similar to ( 302) AT1G66910 | Symbols: | protein kinase, putative | chr1:24961634-24963941 REVERSEweakly similar to ( 194) KPRO_MAIZE Putative receptor protein kinase ZmPK1 precursor (EC 2.7.11.1) - Zea mays (Maize) TyrKc Pkinase_Tyr Pkinase S_TKc PTKc S_TKc PTKc_Src_like PTKc_EphR PTKc_Srm_Brk PTKc_Tec_like PTKc_Jak_rpt2 PTKc_Abl SPS1 PTKc_Itk PTKc_Csk_like PTKc_Src PTKc_Fyn_Yrk PTKc_…	-2.2
		30.2.99	signalling.receptor kinases.misc	os02g0787200	Transcript	highly similar to ( 738) AT2G24370 | Symbols: | ATP binding / kinase/ protein kinase/ protein serine/threonine kinase | chr2:10369979-10373063 REVERSEweakly similar to ( 171) NORK_PEA Nodulation receptor kinase precursor (EC 2.7.11.1) - Pisum sativum (Garden pea) STK_N S_TKc TyrKc Pkinase_Tyr S_TKc PTKc Pkinase SPS1 PTKc_Src_like PTKc_Jak_rpt2 PTKc_Srm_Brk PTKc_Frk_like PTKc_Csk_like PTKc_Ror PTK…	1.9
		30.2.99	signalling.receptor kinases.misc	os02g0154200	Transcript	highly similar to ( 761) AT1G72300 | Symbols: | leucine-rich repeat transmembrane protein kinase, putative | chr1:27217679-27220966 REVERSEhighly similar to ( 635) PSKR_DAUCA Phytosulfokine receptor precursor (EC 2.7.11.1) (Phytosulfokine LRR receptor kinase) - Daucus carota (Carrot) Pkinase_Tyr TyrKc Pkinase PTKc S_TKc S_TKc PTKc_Src_like PTKc_Trk PTKc_Frk_like PTKc_Csk_like PTKc_EphR PTKc_Jak_r…	-1.6
		30.2.99	signalling.receptor kinases.misc	os09g0570100	Transcript	moderately similar to ( 248) AT2G45910 | Symbols: | protein kinase family protein / U-box domain-containing protein | chr2:18894520-18898212 FORWARDweakly similar to ( 124) NORK_MEDTR Nodulation receptor kinase precursor (EC 2.7.11.1) (Does not make infections protein 2) (Symbiosis receptor-like kinase) (MtSYMRK) - Medicago truncatula (Barrel medic) Pkinase S_TKc S_TKc Pkinase_Tyr TyrKc PTKc PTKc…	-2.6
		30.2.99	signalling.receptor kinases.misc	os04g0655300	Transcript	moderately similar to ( 261) AT4G32300 | Symbols: SD2-5 | SD2-5 (S-DOMAIN-2 5); carbohydrate binding / kinase/ protein kinase | chr4:15599970-15602435 FORWARDweakly similar to ( 187) KPRO_MAIZE Putative receptor protein kinase ZmPK1 precursor (EC 2.7.11.1) - Zea mays (Maize) Pkinase_Tyr S_TKc TyrKc PTKc Pkinase S_TKc PTKc_EphR PTKc_Src_like PTKc_Srm_Brk SPS1 PTKc_Csk_like PTKc_EGFR_like PTKc_Jak_…	-1.1
		30.2.99	signalling.receptor kinases.misc	os02g0648100	Transcript	moderately similar to ( 261) AT1G33260 | Symbols: | protein kinase family protein | chr1:12064796-12066114 FORWARDweakly similar to ( 172) NORK_MEDTR Nodulation receptor kinase precursor (EC 2.7.11.1) (Does not make infections protein 2) (Symbiosis receptor-like kinase) (MtSYMRK) - Medicago truncatula (Barrel medic) S_TKc S_TKc Pkinase PTKc Pkinase_Tyr TyrKc SPS1 PTKc_Jak_rpt2 PTKc_Src_like PTKc_…	1.9
		30.2.99	signalling.receptor kinases.misc	os06g0130100	Transcript	nearly identical (1240) AT5G62230 | Symbols: ERL1 | ERL1 (ERECTA-LIKE 1); kinase | chr5:24996433-25002130 FORWARDmoderately similar to ( 332) PSKR_DAUCA Phytosulfokine receptor precursor (EC 2.7.11.1) (Phytosulfokine LRR receptor kinase) - Daucus carota (Carrot) S_TKc S_TKc Pkinase_Tyr Pkinase TyrKc PTKc PTKc_Jak_rpt2 PTKc_Csk_like PTKc_Trk SPS1 PTKc_Src_like PTKc_Itk PTKc_Srm_Brk PTKc_Jak2_Jak3_…	2.7
		30.2.99	signalling.receptor kinases.misc	os01g0114300	Transcript	moderately similar to ( 327) AT5G38280 | Symbols: PR5K | PR5K; kinase/ transmembrane receptor protein serine/threonine kinase | chr5:15293325-15295838 REVERSEweakly similar to ( 200) KPRO_MAIZE Putative receptor protein kinase ZmPK1 precursor (EC 2.7.11.1) - Zea mays (Maize) Pkinase_Tyr TyrKc PTKc Pkinase S_TKc S_TKc PTKc_EGFR_like PTKc_Csk_like PTKc_Src_like PTKc_Syk_like PTKc_Abl PTKc_Jak_rpt2 …	-1.3
		30.2.99	signalling.receptor kinases.misc	os06g0203800	Transcript	nearly identical (1300) AT2G26330 | Symbols: ER, QRP1 | ER (ERECTA); transmembrane receptor protein kinase | chr2:11208367-11213895 REVERSEmoderately similar to ( 266) RPK1_IPONI Receptor-like protein kinase precursor (EC 2.7.11.1) - Ipomoea nil (Japanese morning glory) (Pharbitis nil) Pkinase S_TKc TyrKc S_TKc Pkinase_Tyr PTKc PTKc_Jak_rpt2 PTKc_Csk_like PTKc_EphR PTKc_Itk PTKc_Trk PTKc_EGFR_lik…	2
		30.2.99	signalling.receptor kinases.misc	os04g0584100	Transcript	moderately similar to ( 302) AT5G06740 | Symbols: | lectin protein kinase family protein | chr5:2084094-2086052 FORWARDweakly similar to ( 143) PSKR_DAUCA Phytosulfokine receptor precursor (EC 2.7.11.1) (Phytosulfokine LRR receptor kinase) - Daucus carota (Carrot) PTKc Pkinase_Tyr Pkinase TyrKc S_TKc S_TKc PTKc_Jak_rpt2 SPS1 PTKc_Trk PTKc_Src_like PTKc_Csk_like PTKc_Syk_like PTKc_Tyk2_rpt2 PTKc_A…	4.3
		30.2.99	signalling.receptor kinases.misc	os03g0825800	Transcript	moderately similar to ( 296) AT4G00330 | Symbols: CRCK2 | CRCK2; ATP binding / kinase/ protein kinase/ protein serine/threonine kinase | chr4:142787-144427 REVERSEweakly similar to ( 182) NORK_MEDTR Nodulation receptor kinase precursor (EC 2.7.11.1) (Does not make infections protein 2) (Symbiosis receptor-like kinase) (MtSYMRK) - Medicago truncatula (Barrel medic) Pkinase_Tyr PTKc TyrKc Pkinase S…	1.4
		30.2.99	signalling.receptor kinases.misc	os11g0556400	Transcript	weakly similar to ( 183) AT1G21240 | Symbols: WAK3 | WAK3 (wall associated kinase 3); kinase/ protein serine/threonine kinase | chr1:7434303-7436702 FORWARDweakly similar to ( 149) KPRO_MAIZE Putative receptor protein kinase ZmPK1 precursor (EC 2.7.11.1) - Zea mays (Maize) Pkinase_Tyr TyrKc S_TKc S_TKc Pkinase PTKc PTKc_Csk_like PTKc_Fes_like PTKc_Fes PTKc_Src_like PTKc_Ror PTKc_EphR PTKc_Fer PTK…	2.7
		30.2.99	signalling.receptor kinases.misc	os06g0163000	Transcript	moderately similar to ( 464) AT2G45910 | Symbols: | protein kinase family protein / U-box domain-containing protein | chr2:18894520-18898212 FORWARDmoderately similar to ( 250) STIP_SOYBN Heat shock protein STI (Stress-inducible protein) (GmSTI) - Glycine max (Soybean) S_TKc S_TKc Pkinase Pkinase_Tyr PTKc TyrKc SPS1 PTKc_Csk_like PTKc_Src_like PTKc_Ror PTKc_Srm_Brk PTKc_Trk PTKc_EphR PTKc_InsR_li…	1.3
		30.2.99	signalling.receptor kinases.misc	os10g0548700	Transcript	highly similar to ( 552) AT2G45910 | Symbols: | protein kinase family protein / U-box domain-containing protein | chr2:18894520-18898212 FORWARDweakly similar to ( 149) NORK_MEDTR Nodulation receptor kinase precursor (EC 2.7.11.1) (Does not make infections protein 2) (Symbiosis receptor-like kinase) (MtSYMRK) - Medicago truncatula (Barrel medic) S_TKc S_TKc Pkinase Pkinase_Tyr TyrKc STK_N PTKc SP…	1.6
		30.2.99	signalling.receptor kinases.misc	os03g0101200	Transcript	moderately similar to ( 445) AT5G61550 | Symbols: | protein kinase family protein | chr5:24748325-24751558 FORWARDweakly similar to ( 146) NORK_MEDTR Nodulation receptor kinase precursor (EC 2.7.11.1) (Does not make infections protein 2) (Symbiosis receptor-like kinase) (MtSYMRK) - Medicago truncatula (Barrel medic) S_TKc S_TKc Pkinase Pkinase_Tyr TyrKc PTKc PTKc_Srm_Brk PTKc_Csk_like SPS1 PTKc_I…	-1.6
		30.2.99	signalling.receptor kinases.misc	os11g0233800	Transcript	highly similar to ( 859) AT5G65700 | Symbols: BAM1 | BAM1 (BARELY ANY MERISTEM 1); ATP binding / kinase/ protein serine/threonine kinase | chr5:26281826-26284945 FORWARDmoderately similar to ( 227) RPK1_IPONI Receptor-like protein kinase precursor (EC 2.7.11.1) - Ipomoea nil (Japanese morning glory) (Pharbitis nil) S_TKc Pkinase_Tyr Pkinase S_TKc PTKc TyrKc SPS1 PTKc_Jak_rpt2 PTKc_Src_like PTKc_S…	3.8
		30.2.99	signalling.receptor kinases.misc	os02g0154000	Transcript	highly similar to ( 786) AT1G72300 | Symbols: | leucine-rich repeat transmembrane protein kinase, putative | chr1:27217679-27220966 REVERSEhighly similar to ( 687) PSKR_DAUCA Phytosulfokine receptor precursor (EC 2.7.11.1) (Phytosulfokine LRR receptor kinase) - Daucus carota (Carrot) Pkinase_Tyr Pkinase S_TKc TyrKc S_TKc PTKc PTKc_Trk PTKc_InsR_like PTKc_EphR PTKc_Src_like PTKc_Csk_like PTKc_Jak_…	-1.1
		30.2.99	signalling.receptor kinases.misc	os06g0717200	Transcript	highly similar to ( 931) AT1G75820 | Symbols: CLV1, FAS3, FLO5 | CLV1 (CLAVATA 1); ATP binding / kinase/ protein serine/threonine kinase/ receptor signaling protein serine/threonine kinase | chr1:28463631-28466652 REVERSEmoderately similar to ( 244) RPK1_IPONI Receptor-like protein kinase precursor (EC 2.7.11.1) - Ipomoea nil (Japanese morning glory) (Pharbitis nil) Pkinase_Tyr S_TKc S_TKc Pkinas…	-1
		30.2.99	signalling.receptor kinases.misc	os02g0218600	Transcript	highly similar to ( 526) AT5G57035 | Symbols: | ATP binding / kinase/ protein kinase/ protein serine/threonine kinase/ ubiquitin-protein ligase | chr5:23080743-23083819 FORWARDweakly similar to ( 161) NORK_PEA Nodulation receptor kinase precursor (EC 2.7.11.1) - Pisum sativum (Garden pea) S_TKc S_TKc Pkinase TyrKc Pkinase_Tyr PTKc SPS1 STK_N PTKc_Jak_rpt2 PTKc_Src_like PTKc_InsR_like PTKc_Srm_Brk…	1.9
		30.4.1	signalling.phosphinositides.phosphatidylinositol-4-phosphate 5-kinase	os03g0701800	Transcript	highly similar to ( 815) AT1G60890 | Symbols: | phosphatidylinositol-4-phosphate 5-kinase family protein | chr1:22412452-22416338 REVERSEnearly identical (1602) PI5K1_ORYSA Phosphatidylinositol-4-phosphate 5-kinase 1 precursor (EC 2.7.1.68) (1-phosphatidylinositol-4-phosphate kinase) (PIP5K) (PtdIns(4)P-5-kinase) (Diphosphoinositide kinase) - Oryza sativa (Rice) PIPKc PIPKc PIP5K MSS4 protein|pho…	1
		21.3	redox.heme	os03g0226200	Transcript	moderately similar to ( 216) AT2G16060 | Symbols: GLB1, AHB1, ARATH GLB1, NSHB1, ATGLB1 | AHB1 (ARABIDOPSIS HEMOGLOBIN 1); oxygen binding / oxygen transporter | chr2:6982782-6983522 REVERSEmoderately similar to ( 318) HBL2_ORYSA Non-symbiotic hemoglobin 2 (rHb2) (ORYsa GLB1b) - Oryza sativa (Rice)globin protein|non-symbiotic hemoglobin 2, putative, expressed	7.7
		30.1	signalling.in sugar and nutrient physiology	os09g0567400	Transcript	weakly similar to ( 114) AT1G03430 | Symbols: AHP5 | AHP5 (HISTIDINE-CONTAINING PHOSPHOTRANSFER FACTOR 5); histidine phosphotransfer kinase | chr1:848159-849235 FORWARDmoderately similar to ( 261) HP1_ORYSA Histidine-containing phosphotransfer protein 1 (OsHP1) - Oryza sativa (Rice) protein|histidine-containing phosphotransfer protein, putative, expressed	3.1
		30.1.1	signalling.in sugar and nutrient physiology	os05g0133100	Transcript	weakly similar to ( 192) AT4G01900 | Symbols: PII, GLB1 | GLB1 (GLNB1 HOMOLOG); acetylglutamate kinase regulator | chr4:821736-823294 FORWARDP-II GlnK PRK10858 PRK10665 protein|nitrogen regulatory protein P-II, putative, expressed	1.8
		30.1.1	signalling.in sugar and nutrient physiology	os02g0757100	Transcript	moderately similar to ( 325) AT4G08950 | Symbols: EXO | EXO (EXORDIUM) | chr4:5740378-5741322 FORWARDPhi_1 protein|phosphate-induced protein 1 conserved region domain containing protein, expressed	-1.4
		30.1.1	signalling.in sugar and nutrient physiology	os02g0135900	Transcript	moderately similar to ( 221) AT5G39790 | Symbols: | 5'-AMP-activated protein kinase beta-1 subunit-related | chr5:15932884-15935121 REVERSEAMPKbeta_GBD_like protein|5-AMP-activated protein kinase beta-1 subunit-related, putative, expressed	2.9
		30.1.2	signalling.in sugar and nutrient physiology.pyruvate dehydrogenase kinase	os03g0370000	Transcript	highly similar to ( 525) AT3G06483 | Symbols: PDK, ATPDHK | PDK (PYRUVATE DEHYDROGENASE KINASE); ATP binding / histidine phosphotransfer kinase/ pyruvate dehydrogenase (acetyl-transferring) kinase | chr3:1990727-1992581 REVERSE protein|kinase, putative, expressed	1.4
		30.1.2	signalling.in sugar and nutrient physiology.pyruvate dehydrogenase kinase	os07g0637300	Transcript	highly similar to ( 551) AT3G06483 | Symbols: PDK, ATPDHK | PDK (PYRUVATE DEHYDROGENASE KINASE); ATP binding / histidine phosphotransfer kinase/ pyruvate dehydrogenase (acetyl-transferring) kinase | chr3:1990727-1992581 REVERSE protein|kinase, putative, expressed	-1.7
		21.1	redox.thioredoxin	os07g0186000	Transcript	very weakly similar to (90.5) AT3G51030 | Symbols: ATTRX1, ATTRX H1 | ATTRX1; oxidoreductase, acting on sulfur group of donors, disulfide as acceptor | chr3:18951123-18951955 REVERSEweakly similar to ( 130) TRXH_ORYSA Thioredoxin H-type (TRX-H) (Phloem sap 13 kDa protein 1) - Oryza sativa (Rice) protein|thioredoxin, putative, expressed	-1.7
		21.1	redox.thioredoxin	os11g0199200	Transcript	highly similar to ( 557) AT1G77510 | Symbols: ATPDIL1-2, PDI6, ATPDI6 | ATPDIL1-2 (PDI-LIKE 1-2); protein disulfide isomerase | chr1:29126742-29129433 FORWARDhighly similar to ( 799) PDI_MAIZE Protein disulfide-isomerase precursor (EC 5.3.4.1) (PDI) - Zea mays (Maize) PDI_a_PDI_a'_C PDI_a_family Thioredoxin PDI_a_MPD1_like PDI_a_ERp38 PDI_a_PDIR PDI_a_P5 PDI_a_ERp46 PDI_a_TMX3 PDI_a_QSOX protein|…	-2.2
		30.3	signalling.calcium	os05g0373300	Transcript	highly similar to ( 728) AT1G08860 | Symbols: BON3 | BON3 (BONZAI 3); calcium-dependent phospholipid binding | chr1:2842153-2846138 FORWARD vWA_copine_like Copine protein|copine, putative, expressed	2.3
		30.3	signalling.calcium	os03g0128700	Transcript	highly similar to ( 756) AT4G35310 | Symbols: CPK5, ATCPK5 | CPK5 (calmodulin-domain protein kinase 5); ATP binding / calcium ion binding / calmodulin-dependent protein kinase/ kinase/ protein kinase/ protein serine/threonine kinase | chr4:16802436-16804628 FORWARDnearly identical (1104) CDPK3_ORYSA Calcium-dependent protein kinase, isoform 11 (EC 2.7.11.1) (CDPK 11) - Oryza sativa (Rice) S_TKc S…	1.1
		30.3	signalling.calcium	os07g0515100	Transcript	highly similar to ( 754) AT4G04720 | Symbols: CPK21 | CPK21; ATP binding / calcium ion binding / calmodulin-dependent protein kinase/ kinase/ protein kinase/ protein serine/threonine kinase | chr4:2394817-2397631 REVERSEnearly identical (1003) CDPK2_ORYSA Calcium-dependent protein kinase, isoform 2 (EC 2.7.11.1) (CDPK 2) - Oryza sativa (Rice) S_TKc S_TKc Pkinase SPS1 TyrKc Pkinase_Tyr PTKc FRQ1 P…	1.5
		30.3	signalling.calcium	os12g0132300	Transcript	weakly similar to ( 194) AT2G27030 | Symbols: CAM5 | CAM5 (CALMODULIN 5); calcium ion binding | chr2:11532719-11533060 FORWARDweakly similar to ( 194) CALM3_PETHY Calmodulin-related protein - Petunia hybrida (Petunia) FRQ1 protein|OsCML3 - Calmodulin-related calcium sensor protein, expressed	-1.2
		30.3	signalling.calcium	os10g0177200	Transcript	moderately similar to ( 343) AT4G38810 | Symbols: | calcium-binding EF hand family protein | chr4:18115607-18118860 REVERSE protein|EF hand family protein, putative, expressed	2.3
		30.3	signalling.calcium	os08g0115200	Transcript	moderately similar to ( 252) AT4G00820 | Symbols: iqd17 | iqd17 (IQ-domain 17); calmodulin binding | chr4:349300-351307 FORWARD protein|IQ calmodulin-binding motif domain containing protein, expressed	1.2
		30.3	signalling.calcium	os05g0187500	Transcript	weakly similar to ( 118) AT3G16490 | Symbols: IQD26 | IQD26 (IQ-domain 26); calmodulin binding | chr3:5603962-5605489 REVERSE protein|IQ calmodulin-binding motif family protein, expressed	1.3
		30.3	signalling.calcium	os02g0521300	Transcript	highly similar to ( 691) AT5G61900 | Symbols: BON1, CPN1, BON | BON1 (BONZAI 1); calcium-dependent phospholipid binding | chr5:24855908-24859150 REVERSE vWA_copine_like Copine protein|copine, putative, expressed	1.4
		21.2.1	redox.ascorbate and glutathione.ascorbate	os07g0694700	Transcript	moderately similar to ( 269) AT1G07890 | Symbols: APX1, CS1 | APX1 (ascorbate peroxidase 1); L-ascorbate peroxidase | chr1:2438005-2439435 FORWARDmoderately similar to ( 327) APX2_ORYSA L-ascorbate peroxidase 2, cytosolic (EC 1.11.1.11) (APXb) (OsAPx02) - Oryza sativa (Rice)ascorbate_peroxidase plant_peroxidase peroxidase KatG protein|OsAPx2 - Cytosolic Ascorbate Peroxidase encoding gene 4,5,6,8,…	-2.2
		21.2.1	redox.ascorbate and glutathione.ascorbate	os02g0707000	Transcript	highly similar to ( 536) AT3G27820 | Symbols: ATMDAR4, MDAR4 | MDAR4 (MONODEHYDROASCORBATE REDUCTASE 4); monodehydroascorbate reductase (NADH) | chr3:10315249-10317881 FORWARDmoderately similar to ( 385) MDAR_PEA Monodehydroascorbate reductase (EC 1.6.5.4) (MDAR) (Ascorbate free radical reductase) (AFR reductase) - Pisum sativum (Garden pea) Pyr_redox_2 NirB PRK09754 HcaD PRK09564 Ndh Lpd PRK0496…	-1
		21.2.1	redox.ascorbate and glutathione.ascorbate	os08g0549100	Transcript	moderately similar to ( 347) AT4G35000 | Symbols: APX3 | APX3 (ASCORBATE PEROXIDASE 3); L-ascorbate peroxidase | chr4:16665007-16667541 REVERSEmoderately similar to ( 439) APX4_ORYSA Probable L-ascorbate peroxidase 4 (EC 1.11.1.11) (OsAPx04) - Oryza sativa (Rice)ascorbate_peroxidase plant_peroxidase peroxidase KatG secretory_peroxidase catalase_peroxidase protein|OsAPx4 - Peroxisomal Ascorbate Pe…	-1
		21.2.1	redox.ascorbate and glutathione.ascorbate	os05g0116100	Transcript	moderately similar to ( 284) AT1G75270 | Symbols: DHAR2 | DHAR2 (DEHYDROASCORBATE REDUCTASE 2); glutathione binding / glutathione dehydrogenase (ascorbate) | chr1:28250255-28251237 REVERSE GST_C_DHAR Gst GST_C_CLIC protein|glutathione S-transferase, N-terminal domain containing protein, expressed	1.6
		21.2.2	redox.ascorbate and glutathione.glutathione	os02g0813500	Transcript	highly similar to ( 743) AT3G24170 | Symbols: ATGR1 | ATGR1 (glutathione-disulfide reductase); FAD binding / NADP or NADPH binding / glutathione-disulfide reductase/ oxidoreductase | chr3:8729762-8734115 REVERSEhighly similar to ( 993) GSHRC_ORYSA Glutathione reductase, cytosolic (EC 1.8.1.7) (GR) (GRase) - Oryza sativa (Rice) PRK06116 Lpd PRK06416 PRK06370 PRK06292 PRK07846 PRK05249 PRK05976 PRK…	-1.8
		21.2.2	redox.ascorbate and glutathione.glutathione	os04g0556300	Transcript	moderately similar to ( 289) AT4G11600 | Symbols: ATGPX6, PHGPX, LSC803 | ATGPX6 (GLUTATHIONE PEROXIDASE 6); glutathione peroxidase | chr4:7010021-7011330 REVERSEmoderately similar to ( 286) GPX4_CITSI Probable phospholipid hydroperoxide glutathione peroxidase (EC 1.11.1.12) (PHGPx) (Salt-associated protein) - Citrus sinensis (Sweet orange) GSH_Peroxidase BtuE GSHPx PRK10606 protein|glutathione p…	-1.7
		21.2.2	redox.ascorbate and glutathione.glutathione	os05g0129000	Transcript	highly similar to ( 792) AT4G23100 | Symbols: RML1, PAD2, GSH1, CAD2 | GSH1 (GLUTAMATE-CYSTEINE LIGASE); glutamate-cysteine ligase | chr4:12103779-12106751 REVERSEhighly similar to ( 791) GSH1_BRAJU Glutamate--cysteine ligase, chloroplast precursor (EC 6.3.2.2) (Gamma-glutamylcysteine synthetase) (Gamma-ECS) (GCS) - Brassica juncea (Leaf mustard) (Indian mustard)GshA GCS2 protein|glutamate--cyste…	2.1
		30.11	signalling.light	os02g0568200	Transcript	highly similar to ( 692) AT5G64330 | Symbols: NPH3, RPT3, JK218 | NPH3 (NON-PHOTOTROPIC HYPOCOTYL 3); protein binding / signal transducer | chr5:25727568-25729510 FORWARDnearly identical (1028) NPH3_ORYSA Coleoptile phototropism protein 1 (Non-phototropic hypocotyl 3-like protein) (NPH3-like protein) - Oryza sativa (Rice)NPH3 protein|BTBN2 - Bric-a-Brac, Tramtrack, Broad Complex BTB domain with n…	5.1
		30.11	signalling.light	os02g0573200	Transcript	highly similar to ( 807) AT4G08920 | Symbols: CRY1, BLU1, HY4, OOP2, ATCRY1 | CRY1 (CRYPTOCHROME 1); ATP binding / blue light photoreceptor/ protein homodimerization/ protein kinase | chr4:5724260-5726905 FORWARDhighly similar to ( 578) PHR1_SINAL Deoxyribodipyrimidine photo-lyase (EC 4.1.99.3) (DNA photolyase) (Photoreactivating enzyme) - Sinapis alba (White mustard) (Brassica hirta) PhrB FAD_bi…	-1.2
		30.11	signalling.light	os03g0309200	Transcript	nearly identical (1725) AT2G18790 | Symbols: PHYB, HY3, OOP1 | PHYB (PHYTOCHROME B); G-protein coupled photoreceptor/ protein histidine kinase/ red or far-red light photoreceptor/ signal transducer | chr2:8140079-8144151 FORWARDnearly identical (2288) PHYB_ORYSA Phytochrome B - Oryza sativa (Rice)Phytochrome COG4251 PAS_2 BaeS GAF PAS PRK11107 GAF protein|phytochrome B, putative, expressed	-3.2
		30.11	signalling.light	os02g0625000	Transcript	highly similar to ( 704) AT1G04400 | Symbols: CRY2, FHA, AT-PHH1, PHH1, ATCRY2 | CRY2 (CRYPTOCHROME 2); blue light photoreceptor/ protein homodimerization | chr1:1185719-1187901 REVERSEhighly similar to ( 661) PHR1_SINAL Deoxyribodipyrimidine photo-lyase (EC 4.1.99.3) (DNA photolyase) (Photoreactivating enzyme) - Sinapis alba (White mustard) (Brassica hirta) PhrB FAD_binding_7 PRK10674 DNA_photol…	-1.7
		30.11	signalling.light	os02g0811000	Transcript	moderately similar to ( 221) AT2G31160 | Symbols: LSH3 | LSH3 (LIGHT SENSITIVE HYPOCOTYLS 3) | chr2:13277903-13278562 FORWARDDUF640 protein|DUF640 domain containing protein, putative, expressed	-2.6
		30.11	signalling.light	os03g0752100	Transcript	nearly identical (1380) AT5G35840 | Symbols: PHYC | PHYC (phytochrome defective c); protein histidine kinase | chr5:14008049-14011619 FORWARDnearly identical (2268) PHYC_ORYSA Phytochrome C - Oryza sativa (Rice)Phytochrome COG4251 PAS_2 GAF PAS protein|phytochrome C, putative, expressed	-2.1
		30.11	signalling.light	os10g0478000	Transcript	weakly similar to ( 196) AT2G31160 | Symbols: LSH3 | LSH3 (LIGHT SENSITIVE HYPOCOTYLS 3) | chr2:13277903-13278562 FORWARDDUF640 protein|DUF640 domain containing protein, putative, expressed	6
		30.11.1	signalling.light.COP9 signalosome	os04g0654700	Transcript	highly similar to ( 517) AT1G71230 | Symbols: CSN5B, CSN5, AJH2 | CSN5B (COP9-SIGNALOSOME 5B); protein binding | chr1:26852560-26854255 FORWARD JAB_MPN Mov34 protein|COP9 signalosome complex subunit 5b, putative, expressed	-2.9
		30.7	signalling.14-3-3 proteins	os01g0209200	Transcript	moderately similar to ( 227) AT1G26480 | Symbols: GRF12, GF14 IOTA | GRF12 (GENERAL REGULATORY FACTOR 12); protein binding / protein phosphorylated amino acid binding | chr1:9156573-9157845 REVERSEmoderately similar to ( 355) 14337_ORYSA 14-3-3-like protein GF14-G (G-box factor 14-3-3 homolog G) - Oryza sativa (Rice) 14-3-3 BMH1 14_3_3 protein|14-3-3 protein, putative, expressed	-1.2
		30.7	signalling.14-3-3 proteins	os11g0609600	Transcript	moderately similar to ( 221) AT1G22300 | Symbols: GRF10, GF14 EPSILON | GRF10 (GENERAL REGULATORY FACTOR 10); ATP binding / protein binding / protein phosphorylated amino acid binding | chr1:7879601-7881103 REVERSEmoderately similar to ( 429) 14338_ORYSA Putative 14-3-3-like protein GF14-H (G-box factor 14-3-3 homolog H) - Oryza sativa (Rice) 14-3-3 BMH1 14_3_3 protein|14-3-3 protein, putative, e…	3.6
		30.7	signalling.14-3-3 proteins	os02g0580300	Transcript	moderately similar to ( 261) AT3G02520 | Symbols: GRF7, GF14 NU | GRF7 (GENERAL REGULATORY FACTOR 7); protein binding / protein phosphorylated amino acid binding | chr3:526800-527915 REVERSEmoderately similar to ( 309) 14335_ORYSA 14-3-3-like protein GF14-E (G-box factor 14-3-3 homolog E) - Oryza sativa (Rice) 14-3-3 14_3_3 BMH1 protein|14-3-3 protein, putative, expressed	-1.1
		30.7	signalling.14-3-3 proteins	os03g0710800	Transcript	moderately similar to ( 396) AT3G02520 | Symbols: GRF7, GF14 NU | GRF7 (GENERAL REGULATORY FACTOR 7); protein binding / protein phosphorylated amino acid binding | chr3:526800-527915 REVERSEmoderately similar to ( 463) 14336_ORYSA 14-3-3-like protein GF14-F (G-box factor 14-3-3 homolog F) (OsGF14a) (14-3-3-like protein S94) (Stress-regulated 14-3-3 protein) (SR14-3-3) - Oryza sativa (Rice) 14_3_3…	-1.3
		30.7	signalling.14-3-3 proteins	os04g0462500	Transcript	moderately similar to ( 389) AT3G02520 | Symbols: GRF7, GF14 NU | GRF7 (GENERAL REGULATORY FACTOR 7); protein binding / protein phosphorylated amino acid binding | chr3:526800-527915 REVERSEmoderately similar to ( 451) 14332_ORYSA 14-3-3-like protein GF14-B (G-box factor 14-3-3 homolog B) - Oryza sativa (Rice) 14-3-3 14_3_3 BMH1 protein|14-3-3 protein, putative, expressed	1.2
		30.6	signalling.MAP kinases	os06g0699400	Transcript	highly similar to ( 634) AT1G10210 | Symbols: ATMPK1, MPK1 | ATMPK1 (MITOGEN-ACTIVATED PROTEIN KINASE 1); MAP kinase/ kinase | chr1:3349579-3350776 FORWARDhighly similar to ( 735) MPK4_ORYSA Mitogen-activated protein kinase 4 (EC 2.7.11.24) (MAP kinase 4) (OsMAP2) (Multiple stress-responsive MAP kinase 3) (OsMSRMK3) - Oryza sativa (Rice) S_TKc S_TKc Pkinase SPS1 TyrKc Pkinase_Tyr PTKc PTKc_Jak_rp…	-2.5
		30.6	signalling.MAP kinases	os03g0285800	Transcript	highly similar to ( 576) AT3G45640 | Symbols: ATMPK3, MPK3 | ATMPK3 (ARABIDOPSIS THALIANA MITOGEN-ACTIVATED PROTEIN KINASE 3); MAP kinase/ kinase/ protein binding / protein kinase | chr3:16756918-16758476 FORWARDhighly similar to ( 755) MPK5_ORYSA Mitogen-activated protein kinase 5 (EC 2.7.11.24) (MAP kinase 5) (OsMAPK5) (OsMAP1) (Benzothiadiazole-induced MAP kinase 1) (OsBIMK1) (MAP kinase 2) (O…	1.9
		30.6	signalling.MAP kinases	os05g0566400	Transcript	highly similar to ( 723) AT2G42880 | Symbols: ATMPK20 | ATMPK20; MAP kinase | chr2:17840572-17843947 REVERSEnearly identical (1100) MPK7_ORYSA Mitogen-activated protein kinase 7 (EC 2.7.11.24) (MAP kinase 7) (OsMAPK6) (MAP kinase 6) - Oryza sativa (Rice) S_TKc S_TKc Pkinase SPS1 Pkinase_Tyr TyrKc PTKc PTKc_EphR PTKc_EphR_A PTKc_Jak2_Jak3_rpt2 PTKc_Jak_rpt2 PTKc_FAK PTKc_Src_like PTKc_EphR_B PTKc_…	1.1
		30.7	signalling.14-3-3 proteins	os01g0209200	Transcript	moderately similar to ( 227) AT1G26480 | Symbols: GRF12, GF14 IOTA | GRF12 (GENERAL REGULATORY FACTOR 12); protein binding / protein phosphorylated amino acid binding | chr1:9156573-9157845 REVERSEmoderately similar to ( 355) 14337_ORYSA 14-3-3-like protein GF14-G (G-box factor 14-3-3 homolog G) - Oryza sativa (Rice) 14-3-3 BMH1 14_3_3 protein|14-3-3 protein, putative, expressed	-1.2
		30.7	signalling.14-3-3 proteins	os11g0609600	Transcript	moderately similar to ( 221) AT1G22300 | Symbols: GRF10, GF14 EPSILON | GRF10 (GENERAL REGULATORY FACTOR 10); ATP binding / protein binding / protein phosphorylated amino acid binding | chr1:7879601-7881103 REVERSEmoderately similar to ( 429) 14338_ORYSA Putative 14-3-3-like protein GF14-H (G-box factor 14-3-3 homolog H) - Oryza sativa (Rice) 14-3-3 BMH1 14_3_3 protein|14-3-3 protein, putative, e…	3.6
		30.7	signalling.14-3-3 proteins	os02g0580300	Transcript	moderately similar to ( 261) AT3G02520 | Symbols: GRF7, GF14 NU | GRF7 (GENERAL REGULATORY FACTOR 7); protein binding / protein phosphorylated amino acid binding | chr3:526800-527915 REVERSEmoderately similar to ( 309) 14335_ORYSA 14-3-3-like protein GF14-E (G-box factor 14-3-3 homolog E) - Oryza sativa (Rice) 14-3-3 14_3_3 BMH1 protein|14-3-3 protein, putative, expressed	-1.1
		30.7	signalling.14-3-3 proteins	os03g0710800	Transcript	moderately similar to ( 396) AT3G02520 | Symbols: GRF7, GF14 NU | GRF7 (GENERAL REGULATORY FACTOR 7); protein binding / protein phosphorylated amino acid binding | chr3:526800-527915 REVERSEmoderately similar to ( 463) 14336_ORYSA 14-3-3-like protein GF14-F (G-box factor 14-3-3 homolog F) (OsGF14a) (14-3-3-like protein S94) (Stress-regulated 14-3-3 protein) (SR14-3-3) - Oryza sativa (Rice) 14_3_3…	-1.3
		30.7	signalling.14-3-3 proteins	os04g0462500	Transcript	moderately similar to ( 389) AT3G02520 | Symbols: GRF7, GF14 NU | GRF7 (GENERAL REGULATORY FACTOR 7); protein binding / protein phosphorylated amino acid binding | chr3:526800-527915 REVERSEmoderately similar to ( 451) 14332_ORYSA 14-3-3-like protein GF14-B (G-box factor 14-3-3 homolog B) - Oryza sativa (Rice) 14-3-3 14_3_3 BMH1 protein|14-3-3 protein, putative, expressed	1.2

## Sheet: Table S5
	Supplementary Table S5 : MapMan-based metabolism overview of 1,064 NUE- related DEGs
	BinCode	BinName	Id	Type	Description	Expression value (log2FC)
	3.1.2.2	minor CHO metabolism.raffinose family.raffinose synthases.putative	os08g0495800	Transcript	nearly identical (1093) AT1G55740 | Symbols: AtSIP1 | AtSIP1 (Arabidopsis thaliana seed imbibition 1); hydrolase, hydrolyzing O-glycosyl compounds | chr1:20835507-20838707 REVERSEmoderately similar to ( 443) STSYN_PEA Stachyose synthase precursor (EC 2.4.1.67) (Galactinol--raffinose galactosyltransferase) - Pisum sativum (Garden pea)Raffinose_syn protein|uncharacterized glycosyltransferase, putat…	1.9
	10.7	cell wall.modification	os05g0477600	Transcript	moderately similar to ( 325) AT2G40610 | Symbols: ATEXPA8, EXP8, ATEXP8, ATHEXP ALPHA 1.11 | ATEXPA8 (ARABIDOPSIS THALIANA EXPANSIN A8) | chr2:16949121-16950472 REVERSEmoderately similar to ( 442) EXPA4_ORYSA Expansin-A4 precursor (OsEXPA4) (Alpha-expansin-4) (OsEXP4) (OsaEXPa1.22) - Oryza sativa (Rice)Pollen_allerg_1 DPBB_1 protein|expansin precursor, putative, expressed	1.6
	10.7	cell wall.modification	os04g0583500	Transcript	moderately similar to ( 337) AT3G03220 | Symbols: ATEXPA13, EXP13, ATEXP13, ATHEXP ALPHA 1.22 | ATEXPA13 (ARABIDOPSIS THALIANA EXPANSIN A13) | chr3:742655-743975 REVERSEmoderately similar to ( 500) EXP10_ORYSA Expansin-A10 precursor (OsEXPA10) (Alpha-expansin-10) (OsEXP10) (OsaEXPa1.28) - Oryza sativa (Rice)Pollen_allerg_1 protein|expansin precursor, putative, expressed	-4.8
	10.7	cell wall.modification	os10g0555900	Transcript	moderately similar to ( 214) AT1G65680 | Symbols: ATEXPB2, EXPB2, ATHEXP BETA 1.4 | ATEXPB2 (ARABIDOPSIS THALIANA EXPANSIN B2) | chr1:24427266-24428399 FORWARDmoderately similar to ( 486) EXPB3_ORYSA Expansin-B3 precursor (OsEXPB3) (Beta-expansin-3) (OsaEXPb1.10) - Oryza sativa (Rice)Pollen_allerg_1 protein|expansin precursor, putative, expressed	2
	10.7	cell wall.modification	os10g0117000	Transcript	moderately similar to ( 395) AT1G14720 | Symbols: XTR2, EXGT-A2, ATXTH28 | XTR2 (XYLOGLUCAN ENDOTRANSGLYCOSYLASE RELATED 2); hydrolase, acting on glycosyl bonds / xyloglucan:xyloglucosyl transferase | chr1:5066806-5068466 REVERSEweakly similar to ( 195) XTH_TOBAC Probable xyloglucan endotransglucosylase/hydrolase protein precursor (EC 2.4.1.207) - Nicotiana tabacum (Common tobacco)GH16_XET Glyco_…	-2.1
	10.7	cell wall.modification	os03g0822000	Transcript	moderately similar to ( 407) AT2G39700 | Symbols: ATEXPA4, ATEXP4, ATHEXP ALPHA 1.6 | ATEXPA4 (ARABIDOPSIS THALIANA EXPANSIN A4) | chr2:16544246-16545434 REVERSEmoderately similar to ( 464) EXPA7_ORYSA Expansin-A7 precursor (OsEXPA7) (Alpha-expansin-7) (OsEXP7) (OsaEXPa1.26) - Oryza sativa (Rice)Pollen_allerg_1 DPBB_1 protein|expansin precursor, putative, expressed	2.3
	10.7	cell wall.modification	os10g0555600	Transcript	moderately similar to ( 221) AT1G65680 | Symbols: ATEXPB2, EXPB2, ATHEXP BETA 1.4 | ATEXPB2 (ARABIDOPSIS THALIANA EXPANSIN B2) | chr1:24427266-24428399 FORWARDhighly similar to ( 567) EXPB6_ORYSA Expansin-B6 precursor (OsEXPB6) (Beta-expansin-6) (OsaEXPb1.8) - Oryza sativa (Rice)Pollen_allerg_1 protein|expansin precursor, putative, expressed	7.1
	10.7	cell wall.modification	os08g0237800	Transcript	moderately similar to ( 242) AT5G57560 | Symbols: TCH4, XTH22 | TCH4 (Touch 4); hydrolase, acting on glycosyl bonds / xyloglucan:xyloglucosyl transferase | chr5:23307296-23308235 REVERSEmoderately similar to ( 244) BRU1_SOYBN Brassinosteroid-regulated protein BRU1 precursor - Glycine max (Soybean)GH16_XET Glyco_hydro_16 Glyco_hydrolase_16 GH16_GPI_glucanosyltransferase protein|glycosyl hydrolases…	2.9
	10.7	cell wall.modification	os10g0555700	Transcript	moderately similar to ( 213) AT1G65680 | Symbols: ATEXPB2, EXPB2, ATHEXP BETA 1.4 | ATEXPB2 (ARABIDOPSIS THALIANA EXPANSIN B2) | chr1:24427266-24428399 FORWARDhighly similar to ( 545) EXPB2_ORYSA Expansin-B2 precursor (OsEXPB2) (Beta-expansin-2) (OsaEXPb1.9) - Oryza sativa (Rice)Pollen_allerg_1 protein|expansin precursor, putative, expressed	5.6
	10.7	cell wall.modification	os08g0237000	Transcript	moderately similar to ( 273) AT5G57550 | Symbols: XTR3 | XTR3 (XYLOGLUCAN ENDOTRANSGLYCOSYLASE 3); hydrolase, acting on glycosyl bonds / xyloglucan:xyloglucosyl transferase | chr5:23305055-23306384 REVERSEhighly similar to ( 532) XTH8_ORYSA Xyloglucan endotransglycosylase/hydrolase protein 8 precursor (EC 2.4.1.207) (End-xyloglucan transferase) (OsXTH8) (OsXRT5) - Oryza sativa (Rice)GH16_XET Glyc…	1.1
	10.7	cell wall.modification	os10g0556100	Transcript	moderately similar to ( 206) AT1G65680 | Symbols: ATEXPB2, EXPB2, ATHEXP BETA 1.4 | ATEXPB2 (ARABIDOPSIS THALIANA EXPANSIN B2) | chr1:24427266-24428399 FORWARDhighly similar to ( 527) EXPB4_ORYSA Expansin-B4 precursor (OsEXPB4) (Beta-expansin-4) (OsaEXPb1.7) - Oryza sativa (Rice)Pollen_allerg_1 protein|expansin precursor, putative, expressed	3.4
	10.2.1	cell wall.cellulose synthesis.cellulose synthase	os09g0422500	Transcript	nearly identical (1701) AT5G17420 | Symbols: IRX3, CESA7, ATCESA7, MUR10 | IRX3 (IRREGULAR XYLEM 3); cellulose synthase | chr5:5736859-5741407 REVERSECellulose_synt protein|CESA9 - cellulose synthase, expressed	3.3
	10.2.1	cell wall.cellulose synthesis.cellulose synthase	os10g0467800	Transcript	highly similar to ( 879) AT5G44030 | Symbols: CESA4, IRX5, NWS2 | CESA4 (CELLULOSE SYNTHASE A4); cellulose synthase/ transferase, transferring glycosyl groups | chr5:17714713-17719564 FORWARDCellulose_synt protein|CESA7 - cellulose synthase, expressed	1.1
	10.2.1	cell wall.cellulose synthesis.cellulose synthase	os01g0750300	Transcript	nearly identical (1497) AT4G18780 | Symbols: CESA8, IRX1, ATCESA8, LEW2 | IRX1 (IRREGULAR XYLEM 1); cellulose synthase/ transferase, transferring glycosyl groups | chr4:10312846-10316719 REVERSECellulose_synt protein|CESA4 - cellulose synthase, expressed	6.3
	10.2.1	cell wall.cellulose synthesis.cellulose synthase	os07g0252400	Transcript	nearly identical (1542) AT5G64740 | Symbols: CESA6, IXR2, E112, PRC1 | CESA6 (CELLULOSE SYNTHASE 6); cellulose synthase/ transferase, transferring glycosyl groups | chr5:25881555-25886333 FORWARDCellulose_synt protein|CESA6 - cellulose synthase, expressed	2.4
	10.2.2	cell wall.cellulose synthesis.COBRA	os07g0604300	Transcript	highly similar to ( 667) AT5G60920 | Symbols: COB | COB (COBRA) | chr5:24511466-24513932 REVERSEhighly similar to ( 911) COBL1_ORYSA COBRA-like 1 protein precursor (BRITTLE CULM1-like 6 protein) - Oryza sativa (Rice)Phytochel_synth protein|COBRA, putative, expressed	-2
	10.2.2	cell wall.cellulose synthesis.COBRA	os03g0301200	Transcript	highly similar to ( 665) AT4G16120 | Symbols: ATSEB1, COBL7, SEB1 | COBL7 (COBRA-LIKE 7) | chr4:9116591-9119138 REVERSEweakly similar to ( 150) COBL1_ORYSA COBRA-like 1 protein precursor (BRITTLE CULM1-like 6 protein) - Oryza sativa (Rice)Phytochel_synth protein|COBRA-like protein 7 precursor, putative, expressed	-1.8
	10.2.2	cell wall.cellulose synthesis.COBRA	os10g0497700	Transcript	highly similar to ( 520) AT5G60920 | Symbols: COB | COB (COBRA) | chr5:24511466-24513932 REVERSEhighly similar to ( 842) COBL4_ORYSA COBRA-like 4 protein precursor (BRITTLE CULM1-like 9 protein) - Oryza sativa (Rice)Phytochel_synth protein|COBRA, putative, expressed	-1
	10.2.2	cell wall.cellulose synthesis.COBRA	os05g0386800	Transcript	highly similar to ( 543) AT5G60920 | Symbols: COB | COB (COBRA) | chr5:24511466-24513932 REVERSEhighly similar to ( 682) COBL3_ORYSA COBRA-like 3 protein precursor (BRITTLE CULM1-like 4 protein) - Oryza sativa (Rice)Phytochel_synth protein|COBRA, putative, expressed	1.2
	10.2.2	cell wall.cellulose synthesis.COBRA	os07g0690900	Transcript	highly similar to ( 532) AT4G16120 | Symbols: ATSEB1, COBL7, SEB1 | COBL7 (COBRA-LIKE 7) | chr4:9116591-9119138 REVERSEweakly similar to ( 119) COBL2_ORYSA COBRA-like 2 protein precursor (BRITTLE CULM1-like 2 protein) - Oryza sativa (Rice)Phytochel_synth protein|COBRA-like protein 7 precursor, putative, expressed	-1.1
	10.1	cell wall.precursor synthesis	os08g0206900	Transcript	highly similar to ( 726) AT1G31070 | Symbols: | UDP-N-acetylglucosamine pyrophosphorylase-related | chr1:11084951-11088361 FORWARD COG4284 UDPGP protein|UTP--glucose-1-phosphate uridylyltransferase, putative, expressed	-1.2
	10.1.1.1	cell wall.precursor synthesis.NDP sugar pyrophosphorylase.GDP mannose	os01g0847200	Transcript	highly similar to ( 626) AT2G39770 | Symbols: CYT1, VTC1, SOZ1, EMB101, GMP1 | CYT1 (CYTOKINESIS DEFECTIVE 1); mannose-1-phosphate guanylyltransferase/ nucleotidyltransferase | chr2:16589401-16590741 FORWARD GCD1 NTP_transferase RfbA GlmU GlgC glgC GalU LicC protein|mannose-1-phosphate guanyltransferase, putative, expressed	-1.2
	10.1.30.2	ell wall.precursor synthesis.sugar kinases.arabinose-1-kinase	os02g0141300	Transcript	nearly identical (1516) AT4G16130 | Symbols: ARA1, ISA1, ATISA1 | ARA1 (ARABINOSE KINASE); ATP binding / L-arabinokinase/ galactokinase | chr4:9120875-9127656 FORWARD GalK PRK05101 PRK05322 PRK03817 protein|GHMP kinases ATP-binding protein, putative, expressed	-1.1
	11.1.8	lipid metabolism.FA synthesis and FA elongation.acyl coa ligase	os04g0674700	Transcript	highly similar to ( 703) AT5G16370 | Symbols: AAE5 | AAE5 (ACYL ACTIVATING ENZYME 5); catalytic | chr5:5356823-5358481 REVERSEweakly similar to ( 155) 4CL1_TOBAC 4-coumarate--CoA ligase 1 (EC 6.2.1.12) (4CL 1) (4-coumaroyl-CoA synthase 1) - Nicotiana tabacum (Common tobacco) PRK08162 CaiC PRK08316 PRK06219 AMP-binding PRK07771 PRK06187 PRK07008 Acs PRK06368 PRK06087 PRK08315 PRK06018 PRK08314 PRK…	1.2
	11.1.10	lipid metabolism.FA synthesis and FA elongation.beta ketoacyl CoA synthase	os10g0416200	Transcript	highly similar to ( 540) AT1G04220 | Symbols: KCS2 | KCS2 (3-KETOACYL-COA SYNTHASE 2); fatty acid elongase | chr1:1119853-1122483 REVERSEFAE1_CUT1_RppA CHS_like BcsA protein|3-ketoacyl-CoA synthase, putative, expressed	2.6
	11.1.10	lipid metabolism.FA synthesis and FA elongation.beta ketoacyl CoA synthase	os06g0598800	Transcript	highly similar to ( 842) AT2G26640 | Symbols: KCS11 | KCS11 (3-KETOACYL-COA SYNTHASE 11); acyltransferase/ catalytic/ transferase, transferring acyl groups other than amino-acyl groups | chr2:11330094-11331623 FORWARDFAE1_CUT1_RppA CHS_like BcsA protein|3-ketoacyl-CoA synthase, putative, expressed	1.2
	11.1.10	lipid metabolism.FA synthesis and FA elongation.beta ketoacyl CoA synthase	os03g0220100	Transcript	highly similar to ( 808) AT1G68530 | Symbols: CUT1, POP1, CER6, G2, KCS6 | KCS6 (3-KETOACYL-COA SYNTHASE 6); catalytic/ transferase, transferring acyl groups other than amino-acyl groups | chr1:25713600-25714733 REVERSEFAE1_CUT1_RppA CHS_like BcsA FabH KAS_III init_cond_enzymes protein|3-ketoacyl-CoA synthase, putative, expressed	-1
	11.1.13	lipid metabolism.FA synthesis and FA elongation.acyl-CoA binding protein	os06g0115300	Transcript	weakly similar to ( 104) AT1G31812 | Symbols: ACBP6, ACBP | ACBP6 (acyl-CoA-binding protein 6); acyl-CoA binding / phosphatidylcholine binding | chr1:11411132-11412099 REVERSEweakly similar to ( 117) ACBP_RICCO Acyl-CoA-binding protein (ACBP) - Ricinus communis (Castor bean) ACBP ACBP protein|acyl CoA binding protein, putative, expressed	-1.5
	11.1.15	lipid metabolism.FA synthesis and FA elongation.ACP desaturase	os01g0919900	Transcript	highly similar to ( 604) AT2G43710 | Symbols: SSI2, FAB2 | SSI2; acyl-[acyl-carrier-protein] desaturase/ stearoyl-CoA 9-desaturase | chr2:18120107-18122495 FORWARDhighly similar to ( 613) STAD_RICCO Acyl-[acyl-carrier-protein] desaturase, chloroplast precursor (EC 1.14.19.2) (Stearoyl-ACP desaturase) (Delta(9) stearoyl-acyl carrier protein desaturase) - Ricinus communis (Castor bean)FA_desaturase…	2.5
	11.1.30	lipid metabolism.FA synthesis and FA elongation.pyruvate kinase	os11g0148500	Transcript	highly similar to ( 782) AT3G52990 | Symbols: | pyruvate kinase, putative | chr3:19649336-19652237 FORWARDmoderately similar to ( 307) KPYC_SOYBN Pyruvate kinase, cytosolic isozyme (EC 2.7.1.40) (PK) - Glycine max (Soybean) Pyruvate_Kinase PykF PRK05826 PRK09206 PRK06354 PK PRK06247 PRK06739 PK_C protein|pyruvate kinase, putative, expressed	1.3
	11.3	lipid metabolism.Phospholipid synthesis	os01g0118300	Transcript	highly similar to ( 634) AT1G15110 | Symbols: | phosphatidyl serine synthase family protein | chr1:5199594-5201988 FORWARD PSS protein|phosphatidylserine synthase, putative, expressed	4.1
	11.3	lipid metabolism.Phospholipid synthesis	os05g0554400	Transcript	highly similar to ( 594) AT1G15110 | Symbols: | phosphatidyl serine synthase family protein | chr1:5199594-5201988 FORWARD PSS protein|phosphatidylserine synthase, putative, expressed	-1.2
	11.10.1	lipid metabolism.glycolipid synthesis.MGDG synthase	os02g0802700	Transcript	highly similar to ( 523) AT2G11810 | Symbols: MGDC, MGD3, ATMGD3 | MGDC; 1,2-diacylglycerol 3-beta-galactosyltransferase | chr2:4743388-4746224 FORWARDMGDG_synth MurG murG protein|monogalactosyldiacylglycerol synthase, putative, expressed	-1
	11.10.4	lipid metabolism.glycolipid synthesis.sulfolipid synthase	os01g0142300	Transcript	highly similar to ( 628) AT5G01220 | Symbols: SQD2 | SQD2 (sulfoquinovosyldiacylglycerol 2); UDP-glycosyltransferase/ UDP-sulfoquinovose:DAG sulfoquinovosyltransferase/ transferase, transferring glycosyl groups | chr5:86907-89885 REVERSE RfaG Glycos_transf_1 protein|glycosyl transferase, group 1 domain containing protein, expressed	-1
	11.1.8	lipid metabolism.FA synthesis and FA elongation.acyl coa ligase	os04g0674700	Transcript	highly similar to ( 703) AT5G16370 | Symbols: AAE5 | AAE5 (ACYL ACTIVATING ENZYME 5); catalytic | chr5:5356823-5358481 REVERSEweakly similar to ( 155) 4CL1_TOBAC 4-coumarate--CoA ligase 1 (EC 6.2.1.12) (4CL 1) (4-coumaroyl-CoA synthase 1) - Nicotiana tabacum (Common tobacco) PRK08162 CaiC PRK08316 PRK06219 AMP-binding PRK07771 PRK06187 PRK07008 Acs PRK06368 PRK06087 PRK08315 PRK06018 PRK08314 PRK…	1.2
	11.1.10	lipid metabolism.FA synthesis and FA elongation.beta ketoacyl CoA synthase	os10g0416200	Transcript	highly similar to ( 540) AT1G04220 | Symbols: KCS2 | KCS2 (3-KETOACYL-COA SYNTHASE 2); fatty acid elongase | chr1:1119853-1122483 REVERSEFAE1_CUT1_RppA CHS_like BcsA protein|3-ketoacyl-CoA synthase, putative, expressed	2.6
	11.1.10	lipid metabolism.FA synthesis and FA elongation.beta ketoacyl CoA synthase	os06g0598800	Transcript	highly similar to ( 842) AT2G26640 | Symbols: KCS11 | KCS11 (3-KETOACYL-COA SYNTHASE 11); acyltransferase/ catalytic/ transferase, transferring acyl groups other than amino-acyl groups | chr2:11330094-11331623 FORWARDFAE1_CUT1_RppA CHS_like BcsA protein|3-ketoacyl-CoA synthase, putative, expressed	1.2
	11.1.10	lipid metabolism.FA synthesis and FA elongation.beta ketoacyl CoA synthase	os03g0220100	Transcript	highly similar to ( 808) AT1G68530 | Symbols: CUT1, POP1, CER6, G2, KCS6 | KCS6 (3-KETOACYL-COA SYNTHASE 6); catalytic/ transferase, transferring acyl groups other than amino-acyl groups | chr1:25713600-25714733 REVERSEFAE1_CUT1_RppA CHS_like BcsA FabH KAS_III init_cond_enzymes protein|3-ketoacyl-CoA synthase, putative, expressed	-1
	11.1.13	lipid metabolism.FA synthesis and FA elongation.acyl-CoA binding protein	os06g0115300	Transcript	weakly similar to ( 104) AT1G31812 | Symbols: ACBP6, ACBP | ACBP6 (acyl-CoA-binding protein 6); acyl-CoA binding / phosphatidylcholine binding | chr1:11411132-11412099 REVERSEweakly similar to ( 117) ACBP_RICCO Acyl-CoA-binding protein (ACBP) - Ricinus communis (Castor bean) ACBP ACBP protein|acyl CoA binding protein, putative, expressed	-1.5
	11.1.15	lipid metabolism.FA synthesis and FA elongation.ACP desaturase	os01g0919900	Transcript	highly similar to ( 604) AT2G43710 | Symbols: SSI2, FAB2 | SSI2; acyl-[acyl-carrier-protein] desaturase/ stearoyl-CoA 9-desaturase | chr2:18120107-18122495 FORWARDhighly similar to ( 613) STAD_RICCO Acyl-[acyl-carrier-protein] desaturase, chloroplast precursor (EC 1.14.19.2) (Stearoyl-ACP desaturase) (Delta(9) stearoyl-acyl carrier protein desaturase) - Ricinus communis (Castor bean)FA_desaturase…	2.5
	11.1.30	lipid metabolism.FA synthesis and FA elongation.pyruvate kinase	os11g0148500	Transcript	highly similar to ( 782) AT3G52990 | Symbols: | pyruvate kinase, putative | chr3:19649336-19652237 FORWARDmoderately similar to ( 307) KPYC_SOYBN Pyruvate kinase, cytosolic isozyme (EC 2.7.1.40) (PK) - Glycine max (Soybean) Pyruvate_Kinase PykF PRK05826 PRK09206 PRK06354 PK PRK06247 PRK06739 PK_C protein|pyruvate kinase, putative, expressed	1.3
	11.9.4.5	lipid metabolism.lipid degradation.beta-oxidation.acyl-CoA thioesterase	os04g0436100	Transcript	weakly similar to ( 124) AT1G04290 | Symbols: | thioesterase family protein | chr1:1147721-1148352 REVERSE protein|thioesterase family protein, putative, expressed	4.1
	11.9.4.9	lipid metabolism.lipid degradation.beta-oxidation.multifunctional	os02g0274100	Transcript	highly similar to ( 945) AT4G29010 | Symbols: AIM1 | AIM1 (ABNORMAL INFLORESCENCE MERISTEM); enoyl-CoA hydratase | chr4:14297312-14302016 REVERSEnearly identical (1399) MFP_ORYSA Peroxisomal fatty acid beta-oxidation multifunctional protein (MFP) [Includes: Enoyl-CoA hydratase (EC 4.2.1.17); 3-2-trans-enoyl-CoA isomerase (EC 5.3.3.8); 3-hydroxybutyryl-CoA epimerase (EC 5.1.2.3); 3-hydroxyacyl-CoA…	3.8
	16.1.1	secondary metabolism.isoprenoids.non-mevalonate pathway	os01g0265000	Transcript	moderately similar to ( 432) AT1G74470 | Symbols: | geranylgeranyl reductase | chr1:27991248-27992845 FORWARDFixC protein|FAD binding domain containing protein, expressed	-1.3
	16.1.1	secondary metabolism.isoprenoids.non-mevalonate pathway	os02g0744900	Transcript	highly similar to ( 637) AT1G74470 | Symbols: | geranylgeranyl reductase | chr1:27991248-27992845 FORWARDFixC UbiH protein|FAD binding domain containing protein, expressed	1.1
	16.1.1.3	secondary metabolism.isoprenoids.non-mevalonate pathway.CMS	os01g0887100	Transcript	moderately similar to ( 340) AT2G02500 | Symbols: ISPD, ATMEPCT, MCT | ISPD; 2-C-methyl-D-erythritol 4-phosphate cytidylyltransferase | chr2:671054-673124 REVERSEispD IspD IspD ispDF protein|2-C-methyl-D-erythritol 4-phosphate cytidylyltransferase, putative, expressed	-2.4
	16.1.1.10	secondary metabolism.isoprenoids.non-mevalonate pathway.geranylgeranyl pyrophosphate synthase	os12g0271700	Transcript	moderately similar to ( 474) AT1G17050 | Symbols: SPS2 | SPS2 (Solanesyl diphosphate synthase 2); trans-octaprenyltranstransferase | chr1:5829289-5831215 FORWARDweakly similar to ( 119) GGPPS_HEVBR Geranylgeranyl pyrophosphate synthetase, chloroplast precursor (GGPP synthetase) [Includes: Dimethylallyltranstransferase (EC 2.5.1.1); Geranyltranstransferase (EC 2.5.1.10); Farnesyltranstransferase (…	-1.3
	16.1.2.7	secondary metabolism.isoprenoids.mevalonate pathway.isopentenyl pyrophosphate:dimethyllallyl pyrophosphate isomerase	os07g0546000	Transcript	moderately similar to ( 416) AT3G02780 | Symbols: IPP2, IPIAT1, IDI2 | IPP2 (ISOPENTENYL PYROPHOSPHATE:DIMETHYLALLYL PYROPHOSPHATE ISOMERASE 2); isopentenyl-diphosphate delta-isomerase | chr3:602578-604648 REVERSE IPP_Isomerase Idi PRK03759 protein|hydrolase, NUDIX family, domain containing protein, expressed	1.2
	16.1.3	secondary metabolism.isoprenoids.tocopherol biosynthesis	os02g0306401	Transcript	moderately similar to ( 476) AT5G53970 | Symbols: | aminotransferase, putative | chr5:21910676-21912594 FORWARDvery weakly similar to (85.1) 1A12_CUCMA 1-aminocyclopropane-1-carboxylate synthase CMA101 (EC 4.4.1.14) (ACC synthase) (S-adenosyl-L-methionine methylthioadenosine-lyase) - Cucurbita maxima (Pumpkin) (Winter squash) COG0436 PRK09265 Aminotran_1_2 PRK05794 PRK08363 PRK06108 PRK05764 PRK0…	1.8
	16.1.3.2	secondary metabolism.isoprenoids.tocopherol biosynthesis.homogentisate phytyltransferase	os06g0658900	Transcript	moderately similar to ( 448) AT2G18950 | Symbols: HPT1, TPT1, ATHPT, VTE2 | HPT1 (HOMOGENTISATE PHYTYLTRANSFERASE 1); homogentisate phytyltransferase/ prenyltransferase | chr2:8207491-8210047 FORWARDubiA UbiA protein|prenyltransferase, putative, expressed	-1.5
	16.1.4.1	secondary metabolism.isoprenoids.carotenoids.phytoene synthase	os12g0626400	Transcript	highly similar to ( 508) AT5G17230 | Symbols: | phytoene synthase (PSY) / geranylgeranyl-diphosphate geranylgeranyl transferase | chr5:5659839-5662087 REVERSEhighly similar to ( 520) PSY_DAUCA Phytoene synthase, chloroplast precursor (EC 2.5.1.-) - Daucus carota (Carrot) SQS_PSY Trans_IPPS_HH ERG9 Isoprenoid_Biosyn_C1 Trans_IPPS protein|phytoene synthase, chloroplast precursor, putative, expressed	-1.8
	16.1.4.1	secondary metabolism.isoprenoids.carotenoids.phytoene synthase	os06g0729000	Transcript	moderately similar to ( 476) AT5G17230 | Symbols: | phytoene synthase (PSY) / geranylgeranyl-diphosphate geranylgeranyl transferase | chr5:5659839-5662087 REVERSEhighly similar to ( 567) PSY_MAIZE Phytoene synthase, chloroplast precursor (EC 2.5.1.-) - Zea mays (Maize) SQS_PSY Trans_IPPS_HH ERG9 Isoprenoid_Biosyn_C1 Trans_IPPS protein|phytoene synthase, chloroplast precursor, putative, expressed	-1.1
	16.1.5	secondary metabolism.isoprenoids.terpenoids	os04g0612000	Transcript	moderately similar to ( 396) AT1G79460 | Symbols: GA2, KS, ATKS | GA2 (GA REQUIRING 2); ent-kaurene synthase | chr1:29890568-29894436 FORWARDmoderately similar to ( 395) KSB_CUCMA Ent-kaurene synthase B, chloroplast precursor (EC 4.2.3.19) (KSB) - Cucurbita maxima (Pumpkin) (Winter squash)Terpene_cyclase_plant_C1 Terpene_synth Terpene_synth_C Terpene_cyclase_C1 protein|terpene synthase, putative,…	3.9
	16.1.5	secondary metabolism.isoprenoids.terpenoids	os04g0611800	Transcript	highly similar to ( 681) AT1G79460 | Symbols: GA2, KS, ATKS | GA2 (GA REQUIRING 2); ent-kaurene synthase | chr1:29890568-29894436 FORWARDhighly similar to ( 683) KSB_CUCMA Ent-kaurene synthase B, chloroplast precursor (EC 4.2.3.19) (KSB) - Cucurbita maxima (Pumpkin) (Winter squash)Terpene_cyclase_plant_C1 Terpene_cyclase_C1 Terpene_synth_C Terpene_synth Isoprenoid_Biosyn_C1 protein|ent-kaurene sy…	-1.5
	16.1.5	secondary metabolism.isoprenoids.terpenoids	os02g0570400	Transcript	highly similar to ( 607) AT1G79460 | Symbols: GA2, KS, ATKS | GA2 (GA REQUIRING 2); ent-kaurene synthase | chr1:29890568-29894436 FORWARDhighly similar to ( 606) KSB_CUCMA Ent-kaurene synthase B, chloroplast precursor (EC 4.2.3.19) (KSB) - Cucurbita maxima (Pumpkin) (Winter squash)Terpene_cyclase_plant_C1 Terpene_cyclase_C1 Terpene_synth_C Terpene_synth Isoprenoid_Biosyn_C1 protein|terpene syntha…	-1.1
	16.1.5	secondary metabolism.isoprenoids.terpenoids	os04g0178300	Transcript	moderately similar to ( 303) AT4G02780 | Symbols: GA1, ABC33, ATCPS1 | GA1 (GA REQUIRING 1); ent-copalyl diphosphate synthase/ magnesium ion binding | chr4:1237881-1244766 REVERSEmoderately similar to ( 343) KSA_PEA Ent-kaurene synthase A, chloroplast precursor (EC 5.5.1.13) (Ent-copalyl diphosphate synthase) (KSA) - Pisum sativum (Garden pea)Terpene_cyclase_plant_C1 Terpene_synth protein|ent-kau…	-2.5
	16.8.2	secondary metabolism.flavonoids.chalcones	os05g0212900	Transcript	moderately similar to ( 357) AT5G13930 | Symbols: CHS, TT4, ATCHS | TT4 (TRANSPARENT TESTA 4); naringenin-chalcone synthase | chr5:4488762-4490035 FORWARDmoderately similar to ( 373) CHSY_ORYSA Chalcone synthase (EC 2.3.1.74) (Naregenin-chalcone synthase) - Oryza sativa (Rice)CHS_like Chal_sti_synt_N BcsA Chal_sti_synt_C cond_enzymes FabH KAS_III init_cond_enzymes decarbox_cond_enzymes protein|ch…	4.3
	16.8.2	secondary metabolism.flavonoids.chalcones	os03g0237100	Transcript	moderately similar to ( 369) AT1G59960 | Symbols: | aldo/keto reductase, putative | chr1:22071410-22073067 REVERSEmoderately similar to ( 417) NADO1_ORYSA Probable NAD(P)H-dependent oxidoreductase 1 (EC 1.1.1.-) - Oryza sativa (Rice) Aldo_ket_red ARA1 dkgA dkgB Tas protein|oxidoreductase, aldo/keto reductase family protein, putative, expressed	2.3
	16.8.3	secondary metabolism.flavonoids.dihydroflavonols	os01g0633500	Transcript	moderately similar to ( 326) AT5G42800 | Symbols: DFR, TT3, M318 | DFR (DIHYDROFLAVONOL 4-REDUCTASE); dihydrokaempferol 4-reductase | chr5:17164296-17165864 REVERSEmoderately similar to ( 418) DFRA_HORVU Dihydroflavonol-4-reductase (EC 1.1.1.219) (DFR) (Dihydrokaempferol 4-reductase) - Hordeum vulgare (Barley) protein|dihydroflavonol-4-reductase, putative, expressed	2.4
	16.8.4	secondary metabolism.flavonoids.flavonols	os01g0177400	Transcript	weakly similar to ( 168) AT1G80330 | Symbols: ATGA3OX4, GA3OX4 | GA3OX4 (GIBBERELLIN 3-OXIDASE 4); gibberellin 3-beta-dioxygenase | chr1:30198061-30199537 REVERSEmoderately similar to ( 404) G3O22_WHEAT Gibberellin 3-beta-dioxygenase 2-2 (EC 1.14.11.15) (Gibberellin 3 beta-hydroxylase 2-2) (Gibberellin 3-oxidase 2-2) - Triticum aestivum (Wheat) PcbC 2OG-FeII_Oxy protein|gibberellin 3-beta-dioxyge…	-1.9
	16.7	secondary metabolism.wax	os06g0653000	Transcript	highly similar to ( 697) AT5G57800 | Symbols: FLP1, YRE, CER3, WAX2 | CER3 (ECERIFERUM 3); binding / catalytic/ iron ion binding / oxidoreductase | chr5:23420589-23423832 FORWARD protein|WAX2, putative, expressed	1.3
	16.7	secondary metabolism.wax	os02g0621300	Transcript	highly similar to ( 673) AT1G02205 | Symbols: CER1 | CER1 (ECERIFERUM 1); octadecanal decarbonylase | chr1:418818-422154 FORWARD protein|WAX2, putative, expressed	-1.3
	16.7	secondary metabolism.wax	os02g0814200	Transcript	highly similar to ( 667) AT1G02205 | Symbols: CER1 | CER1 (ECERIFERUM 1); octadecanal decarbonylase | chr1:418818-422154 FORWARD protein|WAX2, putative, expressed	8.2
	16.2	secondary metabolism.phenylpropanoids	os08g0562500	Transcript	moderately similar to ( 385) AT5G23940 | Symbols: EMB3009 | EMB3009 (embryo defective 3009); transferase/ transferase, transferring acyl groups other than amino-acyl groups | chr5:8076616-8079677 REVERSEweakly similar to ( 118) HCBT1_DIACA Anthranilate N-benzoyltransferase protein 1 (EC 2.3.1.144) (Anthranilate N-hydroxycinnamoyl/benzoyltransferase 1) - Dianthus caryophyllus (Carnation) (Clove pi…	3.7
	16.2.1.1	secondary metabolism.phenylpropanoids.lignin biosynthesis.PAL	os02g0626100	Transcript	nearly identical (1008) AT2G37040 | Symbols: pal1, ATPAL1 | pal1 (Phe ammonia lyase 1); phenylalanine ammonia-lyase | chr2:15557602-15560237 REVERSEnearly identical (1368) PAL1_ORYSA Phenylalanine ammonia-lyase (EC 4.3.1.5) - Oryza sativa (Rice) PAL PAL-HAL HutH PRK09367 protein|phenylalanine ammonia-lyase, putative, expressed	1.7
	16.2.1.3	secondary metabolism.phenylpropanoids.lignin biosynthesis.4CL	os02g0177600	Transcript	highly similar to ( 623) AT1G51680 | Symbols: 4CL1, 4CL.1, AT4CL1 | 4CL1 (4-COUMARATE:COA LIGASE 1); 4-coumarate-CoA ligase | chr1:19159080-19161464 REVERSEhighly similar to ( 643) 4CL2_TOBAC 4-coumarate--CoA ligase 2 (EC 6.2.1.12) (4CL 2) (4-coumaroyl-CoA synthase 2) - Nicotiana tabacum (Common tobacco) CaiC AMP-binding PRK06187 PRK07656 PRK08316 PRK08314 PRK08315 PRK05605 PRK07684 PRK06710 Acs …	1.3
	16.2.1.10	secondary metabolism.phenylpropanoids.lignin biosynthesis.CAD	os02g0187800	Transcript	moderately similar to ( 430) AT4G34230 | Symbols: CAD5, CAD-5 | ATCAD5 (CINNAMYL ALCOHOL DEHYDROGENASE 5); cinnamyl-alcohol dehydrogenase | chr4:16386898-16388666 REVERSEhighly similar to ( 505) CADH_MAIZE Cinnamyl alcohol dehydrogenase (EC 1.1.1.195) (CAD) (Brown-midrib 1 protein) - Zea mays (Maize) AdhP PRK09422 Tdh Qor AdhC ADH_N tdh ADH_zinc_N protein|dehydrogenase, putative, expressed	2.3
	19.3	tetrapyrrole synthesis.GSA	os03g0643300	Transcript	highly similar to ( 673) AT5G46180 | Symbols: DELTA-OAT | delta-OAT; ornithine-oxo-acid transaminase | chr5:18718766-18721271 REVERSEweakly similar to ( 121) GSA_HORVU Glutamate-1-semialdehyde 2,1-aminomutase, chloroplast precursor (EC 5.4.3.8) (GSA) (Glutamate-1-semialdehyde aminotransferase) (GSA-AT) - Hordeum vulgare (Barley) rocD ArgD rocD Aminotran_3 GabT PRK03711 PRK02627 BioA argD argD arg…	-2.9
	19.3	tetrapyrrole synthesis.GSA	os08g0532200	Transcript	highly similar to ( 715) AT5G63570 | Symbols: GSA1 | GSA1 (GLUTAMATE-1-SEMIALDEHYDE-2,1-AMINOMUTASE); glutamate-1-semialdehyde 2,1-aminomutase | chr5:25451957-25453620 FORWARDhighly similar to ( 845) GSA_ORYSA Glutamate-1-semialdehyde 2,1-aminomutase, chloroplast precursor (EC 5.4.3.8) (GSA) (Glutamate-1-semialdehyde aminotransferase) (GSA-AT) - Oryza sativa (Rice) PRK00062 HemL PRK12389 PRK06942…	-1.2
	19.5	tetrapyrrole synthesis.porphobilinogen deaminase	os02g0168800	Transcript	moderately similar to ( 408) AT5G08280 | Symbols: HEMC | HEMC (HYDROXYMETHYLBILANE SYNTHASE); hydroxymethylbilane synthase | chr5:2663763-2665596 REVERSEmoderately similar to ( 407) HEM3_PEA Porphobilinogen deaminase, chloroplast precursor (EC 2.5.1.61) (PBG) (Hydroxymethylbilane synthase) (HMBS) (Pre-uroporphyrinogen synthase) - Pisum sativum (Garden pea) hemC HMBS HemC Porphobil_deam PRK01066 p…	-2
	19.7	tetrapyrrole synthesis.uroporphyrinogen decarboxylase	os03g0337600	Transcript	highly similar to ( 600) AT2G40490 | Symbols: HEME2 | HEME2; uroporphyrinogen decarboxylase | chr2:16912961-16914988 FORWARDhighly similar to ( 659) DCUP_MAIZE Uroporphyrinogen decarboxylase, chloroplast precursor (EC 4.1.1.37) (URO-D) (UPD) - Zea mays (Maize) hemE URO-D URO-D HemE URO-D_like Mta_CmuA_like URO-D_CIMS_like PRK06252 protein|uroporphyrinogen decarboxylase, putative, expressed	-2
	19.8	tetrapyrrole synthesis.coproporphyrinogen III oxidase	os04g0610800	Transcript	highly similar to ( 551) AT1G03475 | Symbols: LIN2, HEMF1, ATCPO-I | LIN2 (LESION INITIATION 2); coproporphyrinogen oxidase | chr1:869302-871175 REVERSEhighly similar to ( 592) HEM6_HORVU Coproporphyrinogen III oxidase, chloroplast precursor (EC 1.3.3.3) (Coproporphyrinogenase) (Coprogen oxidase) - Hordeum vulgare (Barley) Coprogen_oxidas PRK05330 HemF protein|coproporphyrinogen III oxidase, chlo…	2
	19.1	tetrapyrrole synthesis.magnesium chelatase	os03g0811100	Transcript	highly similar to ( 983) AT1G08520 | Symbols: PDE166, CHLD | CHLD; ATP binding / magnesium chelatase/ nucleoside-triphosphatase/ nucleotide binding | chr1:2696538-2700819 FORWARDnearly identical (1009) CHLD_TOBAC Magnesium-chelatase subunit chlD, chloroplast precursor (EC 6.6.1.1) (Mg-protoporphyrin IX chelatase) (Mg-chelatase subunit D) - Nicotiana tabacum (Common tobacco)ChlI chlI vWA_Magnesium…	-3.1
	19.1	tetrapyrrole synthesis.magnesium chelatase	os03g0563300	Transcript	highly similar to ( 545) AT5G45930 | Symbols: CHLI2, CHL I2, CHLI-2 | CHLI2 (MAGNESIUM CHELATASE I2); ATPase/ magnesium chelatase | chr5:18628095-18629565 FORWARDhighly similar to ( 563) CHLI_SOYBN Magnesium-chelatase subunit chlI, chloroplast precursor (EC 6.6.1.1) (Mg-protoporphyrin IX chelatase) - Glycine max (Soybean)chlI ChlI protein|magnesium-chelatase subunit chlI, chloroplast precursor, p…	1.4
	19.11	tetrapyrrole synthesis.magnesium protoporphyrin IX methyltransferase	os06g0132400	Transcript	moderately similar to ( 300) AT4G25080 | Symbols: CHLM | CHLM (magnesium-protoporphyrin IX methyltransferase); magnesium protoporphyrin IX methyltransferase | chr4:12877216-12878128 FORWARD PRK07580 Mg-por_mtran_C UbiG protein|magnesium-protoporphyrin O-methyltransferase, putative, expressed	1.2
	19.12	tetrapyrrole synthesis.magnesium-protoporphyrin IX monomethyl ester (oxidative) cyclase	os01g0279100	Transcript	moderately similar to ( 486) AT3G56940 | Symbols: CRD1, CHL27, ACSF | CRD1 (COPPER RESPONSE DEFECT 1); DNA binding / magnesium-protoporphyrin IX monomethyl ester (oxidative) cyclase | chr3:21076594-21078269 FORWARDhighly similar to ( 519) CRD1_HORVU Magnesium-protoporphyrin IX monomethyl ester [oxidative] cyclase, chloroplast precursor (EC 1.14.13.81) (Mg-protoporphyrin IX monomethyl ester oxidat…	1.2
	19.14	tetrapyrrole synthesis.protochlorophyllide reductase	os04g0678700	Transcript	moderately similar to ( 462) AT5G54190 | Symbols: PORA | PORA; oxidoreductase/ protochlorophyllide reductase | chr5:21991183-21992238 REVERSEhighly similar to ( 516) PORA_WHEAT Protochlorophyllide reductase A, chloroplast precursor (EC 1.3.1.33) (PCR A) (NADPH-protochlorophyllide oxidoreductase A) (POR A) - Triticum aestivum (Wheat) PRK07453 PRK06197 PRK06196 PRK05854 FabG protein|protochlorophyl…	2.8
	19.14	tetrapyrrole synthesis.protochlorophyllide reductase	os10g0496900	Transcript	highly similar to ( 509) AT5G54190 | Symbols: PORA | PORA; oxidoreductase/ protochlorophyllide reductase | chr5:21991183-21992238 REVERSEhighly similar to ( 534) PORB_HORVU Protochlorophyllide reductase B, chloroplast precursor (EC 1.3.1.33) (PCR B) (NADPH-protochlorophyllide oxidoreductase B) (POR B) - Hordeum vulgare (Barley) PRK07453 PRK06197 PRK06196 protein|oxidoreductase, short chain dehydr…	1.6
	19.15	tetrapyrrole synthesis.chlorophyll synthase	os05g0349700	Transcript	highly similar to ( 510) AT3G51820 | Symbols: ATG4, G4, CHLG | G4; chlorophyll synthetase | chr3:19216301-19218934 REVERSEPRK07566 UbiA PRK12392 UbiA protein|prenyltransferase, putative, expressed	-1.3
	19.21	tetrapyrrole synthesis.heme oxygenase	os03g0395000	Transcript	moderately similar to ( 211) AT2G26550 | Symbols: HO2 | HO2 (HEME OXYGENASE 2); heme oxygenase (decyclizing) | chr2:11291584-11293426 REVERSE HemeO protein|heme oxygenase 2, putative, expressed	-1.1
	19.4	tetrapyrrole synthesis.regulation	os11g0267000	Transcript	moderately similar to ( 209) AT3G59400 | Symbols: GUN4 | GUN4; enzyme binding / tetrapyrrole binding | chr3:21948881-21949678 REVERSEGUN4 protein|uncharacterized protein ycf53, putative, expressed	1.3
	2.1.2	major CHO metabolism.synthesis.starch	os10g0555100	Transcript	highly similar to ( 571) AT4G16600 | Symbols: | transferase, transferring glycosyl groups / transferase, transferring hexosyl groups | chr4:9350039-9352707 FORWARD protein|glycosyl transferase 8 domain containing protein, putative, expressed	1.7
	2.1.2.1	major CHO metabolism.synthesis.starch.AGPase	os01g0633100	Transcript	highly similar to ( 597) AT1G27680 | Symbols: APL2 | APL2 (ADPGLC-PPASE LARGE SUBUNIT); glucose-1-phosphate adenylyltransferase | chr1:9631630-9634450 FORWARDhighly similar to ( 805) GLGL1_MAIZE Glucose-1-phosphate adenylyltransferase large subunit 1, chloroplast precursor (EC 2.7.7.27) (ADP-glucose synthase) (ADP-glucose pyrophosphorylase) (AGPase S) (Alpha-D-glucose-1-phosphate adenyl transfera…	-1
	2.1.2.1	major CHO metabolism.synthesis.starch.AGPase	os09g0298200	Transcript	highly similar to ( 823) AT5G48300 | Symbols: ADG1, APS1 | ADG1 (ADP GLUCOSE PYROPHOSPHORYLASE 1); glucose-1-phosphate adenylyltransferase | chr5:19570326-19572557 FORWARDhighly similar to ( 844) GLGS_HORVU Glucose-1-phosphate adenylyltransferase small subunit, chloroplast precursor (EC 2.7.7.27) (ADP-glucose synthase) (ADP-glucose pyrophosphorylase) (AGPase B) (Alpha-D-glucose-1-phosphate adenyl…	3.3
	2.1.2.1	major CHO metabolism.synthesis.starch.AGPase	os08g0345800	Transcript	highly similar to ( 780) AT5G48300 | Symbols: ADG1, APS1 | ADG1 (ADP GLUCOSE PYROPHOSPHORYLASE 1); glucose-1-phosphate adenylyltransferase | chr5:19570326-19572557 FORWARDhighly similar to ( 904) GLGS_ORYSA Glucose-1-phosphate adenylyltransferase small subunit, chloroplast precursor (EC 2.7.7.27) (ADP-glucose synthase) (ADP-glucose pyrophosphorylase) (AGPase B) (Alpha-D-glucose-1-phosphate adenyl…	2.2
	2.1.2.1	major CHO metabolism.synthesis.starch.AGPase	os03g0735000	Transcript	highly similar to ( 770) AT5G19220 | Symbols: ADG2, APL1 | APL1 (ADP GLUCOSE PYROPHOSPHORYLASE LARGE SUBUNIT 1); glucose-1-phosphate adenylyltransferase | chr5:6463931-6466775 REVERSEhighly similar to ( 764) GLGL3_SOLTU Glucose-1-phosphate adenylyltransferase large subunit 3, chloroplast precursor (EC 2.7.7.27) (ADP-glucose synthase) (ADP-glucose pyrophosphorylase) (AGPase S) (Alpha-D-glucose-1-p…	2.5
	2.1.2.1	major CHO metabolism.synthesis.starch.AGPase	os05g0580000	Transcript	highly similar to ( 684) AT1G27680 | Symbols: APL2 | APL2 (ADPGLC-PPASE LARGE SUBUNIT); glucose-1-phosphate adenylyltransferase | chr1:9631630-9634450 FORWARDhighly similar to ( 997) GLGL2_WHEAT Glucose-1-phosphate adenylyltransferase large subunit, chloroplast precursor (EC 2.7.7.27) (ADP-glucose synthase) (ADP-glucose pyrophosphorylase) (AGPase S) (Alpha-D-glucose-1-phosphate adenyl transferase…	1.6
	2.1.2.2	major CHO metabolism.synthesis.starch.starch synthase	os06g0229800	Transcript	highly similar to ( 827) AT3G01180 | Symbols: AtSS2 | AtSS2 (starch synthase 2); transferase, transferring glycosyl groups | chr3:62456-65678 REVERSEnearly identical (1286) SSY23_ORYSA Soluble starch synthase 2-3, chloroplast precursor (EC 2.4.1.21) (Soluble starch synthase II-3) (Starch synthase IIa) - Oryza sativa (Rice)glgA GlgA Glyco_transf_5 protein|soluble starch synthase 2-3, chloroplast p…	2.1
	2.1.2.2	major CHO metabolism.synthesis.starch.starch synthase	os07g0412100	Transcript	highly similar to ( 745) AT1G32900 | Symbols: | starch synthase, putative | chr1:11920582-11923506 REVERSEhighly similar to ( 919) SSG1B_HORVU Granule-bound starch synthase 1b, chloroplast precursor (EC 2.4.1.242) (Granule-bound starch synthase Ib) (Fragment) - Hordeum vulgare (Barley)glgA GlgA Glyco_transf_5 Glycos_transf_1 protein|starch synthase, putative, expressed	3.6
	2.1.2.2	major CHO metabolism.synthesis.starch.starch synthase	os06g0133000	Transcript	highly similar to ( 768) AT1G32900 | Symbols: | starch synthase, putative | chr1:11920582-11923506 REVERSEnearly identical (1214) SSG1_ORYSA Granule-bound starch synthase 1, chloroplast precursor (EC 2.4.1.242) (Granule-bound starch synthase I) (GBSS-I) - Oryza sativa (Rice)glgA GlgA Glyco_transf_5 RfaG Glycos_transf_1 protein|starch synthase, putative, expressed	-2
	2.1.2.2	major CHO metabolism.synthesis.starch.starch synthase	os06g0160700	Transcript	highly similar to ( 830) AT5G24300 | Symbols: SSI1, SSI, ATSS1 | SSI1 (SUPPRESSOR OF SALICYLIC ACID INSENSITIVITY 1); starch synthase/ transferase, transferring glycosyl groups | chr5:8266934-8270860 FORWARDnearly identical (1120) SSY1_ORYSA Soluble starch synthase 1, chloroplast precursor (EC 2.4.1.21) (Starch synthase I) (SSS 1) - Oryza sativa (Rice)glgA GlgA Glyco_transf_5 protein|starch synth…	1.6
	2.1.2.2	major CHO metabolism.synthesis.starch.starch synthase	os02g0744700	Transcript	highly similar to ( 863) AT3G01180 | Symbols: AtSS2 | AtSS2 (starch synthase 2); transferase, transferring glycosyl groups | chr3:62456-65678 REVERSEnearly identical (1248) SSY22_ORYSA Soluble starch synthase 2-2, chloroplast precursor (EC 2.4.1.21) (Soluble starch synthase II-2) - Oryza sativa (Rice)glgA GlgA Glyco_transf_5 protein|starch synthase, putative, expressed	2.2
	2.1.2.3	major CHO metabolism.synthesis.starch.starch branching	os02g0528200	Transcript	nearly identical (1206) AT5G03650 | Symbols: SBE2.2 | SBE2.2 (starch branching enzyme 2.2); 1,4-alpha-glucan branching enzyme | chr5:931924-937470 FORWARDnearly identical (1337) GLGB_MAIZE 1,4-alpha-glucan branching enzyme IIB, chloroplast precursor (EC 2.4.1.18) (Starch branching enzyme IIB) (Q-enzyme) - Zea mays (Maize) GlgB PRK12313 PRK05402 PRK12568 Glycogen_branching_enzyme_like_N_term PulA …	-1.6
	2.1.2.3	major CHO metabolism.synthesis.starch.starch branching	os06g0726400	Transcript	highly similar to ( 795) AT5G03650 | Symbols: SBE2.2 | SBE2.2 (starch branching enzyme 2.2); 1,4-alpha-glucan branching enzyme | chr5:931924-937470 FORWARDnearly identical (1598) GLGB_ORYSA 1,4-alpha-glucan branching enzyme, chloroplast precursor (EC 2.4.1.18) (Starch branching enzyme) (Q-enzyme) - Oryza sativa (Rice) GlgB PRK12313 PRK05402 Glycogen_branching_enzyme_like_N_term PRK12568 PulA prot…	1.4
	2.1.2.4	major CHO metabolism.synthesis.starch.debranching	os08g0520900	Transcript	nearly identical (1117) AT2G39930 | Symbols: ISA1, ATISA1 | ISA1 (ISOAMYLASE 1); alpha-amylase/ isoamylase | chr2:16666078-16672183 FORWARD PulA PRK03705 Isoamylase_N_term GlgB Alpha-amylase PRK12313 PRK05402 Glycogen_debranching_enzyme_N_term AmyA Aamy protein|Alpha amylase, catalytic domain containing protein, expressed	2.2
	21.2.1	redox.ascorbate and glutathione.ascorbate	os07g0694700	Transcript	moderately similar to ( 269) AT1G07890 | Symbols: APX1, CS1 | APX1 (ascorbate peroxidase 1); L-ascorbate peroxidase | chr1:2438005-2439435 FORWARDmoderately similar to ( 327) APX2_ORYSA L-ascorbate peroxidase 2, cytosolic (EC 1.11.1.11) (APXb) (OsAPx02) - Oryza sativa (Rice)ascorbate_peroxidase plant_peroxidase peroxidase KatG protein|OsAPx2 - Cytosolic Ascorbate Peroxidase encoding gene 4,5,6,8,…	-2.2
	21.2.1	redox.ascorbate and glutathione.ascorbate	os02g0707000	Transcript	highly similar to ( 536) AT3G27820 | Symbols: ATMDAR4, MDAR4 | MDAR4 (MONODEHYDROASCORBATE REDUCTASE 4); monodehydroascorbate reductase (NADH) | chr3:10315249-10317881 FORWARDmoderately similar to ( 385) MDAR_PEA Monodehydroascorbate reductase (EC 1.6.5.4) (MDAR) (Ascorbate free radical reductase) (AFR reductase) - Pisum sativum (Garden pea) Pyr_redox_2 NirB PRK09754 HcaD PRK09564 Ndh Lpd PRK0496…	-1
	21.2.1	redox.ascorbate and glutathione.ascorbate	os08g0549100	Transcript	moderately similar to ( 347) AT4G35000 | Symbols: APX3 | APX3 (ASCORBATE PEROXIDASE 3); L-ascorbate peroxidase | chr4:16665007-16667541 REVERSEmoderately similar to ( 439) APX4_ORYSA Probable L-ascorbate peroxidase 4 (EC 1.11.1.11) (OsAPx04) - Oryza sativa (Rice)ascorbate_peroxidase plant_peroxidase peroxidase KatG secretory_peroxidase catalase_peroxidase protein|OsAPx4 - Peroxisomal Ascorbate Pe…	-1
	21.2.1	redox.ascorbate and glutathione.ascorbate	os05g0116100	Transcript	moderately similar to ( 284) AT1G75270 | Symbols: DHAR2 | DHAR2 (DEHYDROASCORBATE REDUCTASE 2); glutathione binding / glutathione dehydrogenase (ascorbate) | chr1:28250255-28251237 REVERSE GST_C_DHAR Gst GST_C_CLIC protein|glutathione S-transferase, N-terminal domain containing protein, expressed	1.6
	21.2.2	redox.ascorbate and glutathione.glutathione	os02g0813500	Transcript	highly similar to ( 743) AT3G24170 | Symbols: ATGR1 | ATGR1 (glutathione-disulfide reductase); FAD binding / NADP or NADPH binding / glutathione-disulfide reductase/ oxidoreductase | chr3:8729762-8734115 REVERSEhighly similar to ( 993) GSHRC_ORYSA Glutathione reductase, cytosolic (EC 1.8.1.7) (GR) (GRase) - Oryza sativa (Rice) PRK06116 Lpd PRK06416 PRK06370 PRK06292 PRK07846 PRK05249 PRK05976 PRK…	-1.8
	21.2.2	redox.ascorbate and glutathione.glutathione	os04g0556300	Transcript	moderately similar to ( 289) AT4G11600 | Symbols: ATGPX6, PHGPX, LSC803 | ATGPX6 (GLUTATHIONE PEROXIDASE 6); glutathione peroxidase | chr4:7010021-7011330 REVERSEmoderately similar to ( 286) GPX4_CITSI Probable phospholipid hydroperoxide glutathione peroxidase (EC 1.11.1.12) (PHGPx) (Salt-associated protein) - Citrus sinensis (Sweet orange) GSH_Peroxidase BtuE GSHPx PRK10606 protein|glutathione p…	-1.7
	21.2.2	redox.ascorbate and glutathione.glutathione	os05g0129000	Transcript	highly similar to ( 792) AT4G23100 | Symbols: RML1, PAD2, GSH1, CAD2 | GSH1 (GLUTAMATE-CYSTEINE LIGASE); glutamate-cysteine ligase | chr4:12103779-12106751 REVERSEhighly similar to ( 791) GSH1_BRAJU Glutamate--cysteine ligase, chloroplast precursor (EC 6.3.2.2) (Gamma-glutamylcysteine synthetase) (Gamma-ECS) (GCS) - Brassica juncea (Leaf mustard) (Indian mustard)GshA GCS2 protein|glutamate--cyste…	2.1
	19.3	tetrapyrrole synthesis.GSA	os03g0643300	Transcript	highly similar to ( 673) AT5G46180 | Symbols: DELTA-OAT | delta-OAT; ornithine-oxo-acid transaminase | chr5:18718766-18721271 REVERSEweakly similar to ( 121) GSA_HORVU Glutamate-1-semialdehyde 2,1-aminomutase, chloroplast precursor (EC 5.4.3.8) (GSA) (Glutamate-1-semialdehyde aminotransferase) (GSA-AT) - Hordeum vulgare (Barley) rocD ArgD rocD Aminotran_3 GabT PRK03711 PRK02627 BioA argD argD arg…	-2.9
	19.3	tetrapyrrole synthesis.GSA	os08g0532200	Transcript	highly similar to ( 715) AT5G63570 | Symbols: GSA1 | GSA1 (GLUTAMATE-1-SEMIALDEHYDE-2,1-AMINOMUTASE); glutamate-1-semialdehyde 2,1-aminomutase | chr5:25451957-25453620 FORWARDhighly similar to ( 845) GSA_ORYSA Glutamate-1-semialdehyde 2,1-aminomutase, chloroplast precursor (EC 5.4.3.8) (GSA) (Glutamate-1-semialdehyde aminotransferase) (GSA-AT) - Oryza sativa (Rice) PRK00062 HemL PRK12389 PRK06942…	-1.2
	19.5	tetrapyrrole synthesis.porphobilinogen deaminase	os02g0168800	Transcript	moderately similar to ( 408) AT5G08280 | Symbols: HEMC | HEMC (HYDROXYMETHYLBILANE SYNTHASE); hydroxymethylbilane synthase | chr5:2663763-2665596 REVERSEmoderately similar to ( 407) HEM3_PEA Porphobilinogen deaminase, chloroplast precursor (EC 2.5.1.61) (PBG) (Hydroxymethylbilane synthase) (HMBS) (Pre-uroporphyrinogen synthase) - Pisum sativum (Garden pea) hemC HMBS HemC Porphobil_deam PRK01066 p…	-2
	19.7	tetrapyrrole synthesis.uroporphyrinogen decarboxylase	os03g0337600	Transcript	highly similar to ( 600) AT2G40490 | Symbols: HEME2 | HEME2; uroporphyrinogen decarboxylase | chr2:16912961-16914988 FORWARDhighly similar to ( 659) DCUP_MAIZE Uroporphyrinogen decarboxylase, chloroplast precursor (EC 4.1.1.37) (URO-D) (UPD) - Zea mays (Maize) hemE URO-D URO-D HemE URO-D_like Mta_CmuA_like URO-D_CIMS_like PRK06252 protein|uroporphyrinogen decarboxylase, putative, expressed	-2
	19.8	tetrapyrrole synthesis.coproporphyrinogen III oxidase	os04g0610800	Transcript	highly similar to ( 551) AT1G03475 | Symbols: LIN2, HEMF1, ATCPO-I | LIN2 (LESION INITIATION 2); coproporphyrinogen oxidase | chr1:869302-871175 REVERSEhighly similar to ( 592) HEM6_HORVU Coproporphyrinogen III oxidase, chloroplast precursor (EC 1.3.3.3) (Coproporphyrinogenase) (Coprogen oxidase) - Hordeum vulgare (Barley) Coprogen_oxidas PRK05330 HemF protein|coproporphyrinogen III oxidase, chlo…	2
	19.1	tetrapyrrole synthesis.magnesium chelatase	os03g0811100	Transcript	highly similar to ( 983) AT1G08520 | Symbols: PDE166, CHLD | CHLD; ATP binding / magnesium chelatase/ nucleoside-triphosphatase/ nucleotide binding | chr1:2696538-2700819 FORWARDnearly identical (1009) CHLD_TOBAC Magnesium-chelatase subunit chlD, chloroplast precursor (EC 6.6.1.1) (Mg-protoporphyrin IX chelatase) (Mg-chelatase subunit D) - Nicotiana tabacum (Common tobacco)ChlI chlI vWA_Magnesium…	-3.1
	19.1	tetrapyrrole synthesis.magnesium chelatase	os03g0563300	Transcript	highly similar to ( 545) AT5G45930 | Symbols: CHLI2, CHL I2, CHLI-2 | CHLI2 (MAGNESIUM CHELATASE I2); ATPase/ magnesium chelatase | chr5:18628095-18629565 FORWARDhighly similar to ( 563) CHLI_SOYBN Magnesium-chelatase subunit chlI, chloroplast precursor (EC 6.6.1.1) (Mg-protoporphyrin IX chelatase) - Glycine max (Soybean)chlI ChlI protein|magnesium-chelatase subunit chlI, chloroplast precursor, p…	1.4
	19.11	tetrapyrrole synthesis.magnesium protoporphyrin IX methyltransferase	os06g0132400	Transcript	moderately similar to ( 300) AT4G25080 | Symbols: CHLM | CHLM (magnesium-protoporphyrin IX methyltransferase); magnesium protoporphyrin IX methyltransferase | chr4:12877216-12878128 FORWARD PRK07580 Mg-por_mtran_C UbiG protein|magnesium-protoporphyrin O-methyltransferase, putative, expressed	1.2
	19.12	tetrapyrrole synthesis.magnesium-protoporphyrin IX monomethyl ester (oxidative) cyclase	os01g0279100	Transcript	moderately similar to ( 486) AT3G56940 | Symbols: CRD1, CHL27, ACSF | CRD1 (COPPER RESPONSE DEFECT 1); DNA binding / magnesium-protoporphyrin IX monomethyl ester (oxidative) cyclase | chr3:21076594-21078269 FORWARDhighly similar to ( 519) CRD1_HORVU Magnesium-protoporphyrin IX monomethyl ester [oxidative] cyclase, chloroplast precursor (EC 1.14.13.81) (Mg-protoporphyrin IX monomethyl ester oxidat…	1.2
	19.14	tetrapyrrole synthesis.protochlorophyllide reductase	os04g0678700	Transcript	moderately similar to ( 462) AT5G54190 | Symbols: PORA | PORA; oxidoreductase/ protochlorophyllide reductase | chr5:21991183-21992238 REVERSEhighly similar to ( 516) PORA_WHEAT Protochlorophyllide reductase A, chloroplast precursor (EC 1.3.1.33) (PCR A) (NADPH-protochlorophyllide oxidoreductase A) (POR A) - Triticum aestivum (Wheat) PRK07453 PRK06197 PRK06196 PRK05854 FabG protein|protochlorophyl…	2.8
	19.14	tetrapyrrole synthesis.protochlorophyllide reductase	os10g0496900	Transcript	highly similar to ( 509) AT5G54190 | Symbols: PORA | PORA; oxidoreductase/ protochlorophyllide reductase | chr5:21991183-21992238 REVERSEhighly similar to ( 534) PORB_HORVU Protochlorophyllide reductase B, chloroplast precursor (EC 1.3.1.33) (PCR B) (NADPH-protochlorophyllide oxidoreductase B) (POR B) - Hordeum vulgare (Barley) PRK07453 PRK06197 PRK06196 protein|oxidoreductase, short chain dehydr…	1.6
	19.15	tetrapyrrole synthesis.chlorophyll synthase	os05g0349700	Transcript	highly similar to ( 510) AT3G51820 | Symbols: ATG4, G4, CHLG | G4; chlorophyll synthetase | chr3:19216301-19218934 REVERSEPRK07566 UbiA PRK12392 UbiA protein|prenyltransferase, putative, expressed	-1.3
	19.21	tetrapyrrole synthesis.heme oxygenase	os03g0395000	Transcript	moderately similar to ( 211) AT2G26550 | Symbols: HO2 | HO2 (HEME OXYGENASE 2); heme oxygenase (decyclizing) | chr2:11291584-11293426 REVERSE HemeO protein|heme oxygenase 2, putative, expressed	-1.1
	19.4	tetrapyrrole synthesis.regulation	os11g0267000	Transcript	moderately similar to ( 209) AT3G59400 | Symbols: GUN4 | GUN4; enzyme binding / tetrapyrrole binding | chr3:21948881-21949678 REVERSEGUN4 protein|uncharacterized protein ycf53, putative, expressed	1.3
	1.1.1.1	PS.lightreaction.photosystem II.LHC-II	os09g0346500	Transcript	moderately similar to ( 413) AT2G34430 | Symbols: LHB1B1, LHCB1.4 | LHB1B1; chlorophyll binding | chr2:14524818-14525618 FORWARDmoderately similar to ( 471) CB21_ORYSA Chlorophyll a-b binding protein 1, chloroplast precursor (LHCII type I CAB-1) (LHCP) - Oryza sativa (Rice)Chloroa_b-bind protein|chlorophyll A-B binding protein, putative, expressed	2.9
	1.1.1.1	PS.lightreaction.photosystem II.LHC-II	os08g0435900	Transcript	moderately similar to ( 373) AT3G47470 | Symbols: LHCA4, CAB4 | LHCA4 (LIGHT-HARVESTING CHLOROPHYLL-PROTEIN COMPLEX I SUBUNIT A4); chlorophyll binding | chr3:17493622-17494773 REVERSEmoderately similar to ( 223) CB12_PETHY Chlorophyll a-b binding protein, chloroplast precursor (LHCI type II CAB) - Petunia hybrida (Petunia)Chloroa_b-bind protein|chlorophyll A-B binding protein, putative, expressed	1.2
	1.1.1.1	PS.lightreaction.photosystem II.LHC-II	os01g0600900	Transcript	moderately similar to ( 424) AT2G34430 | Symbols: LHB1B1, LHCB1.4 | LHB1B1; chlorophyll binding | chr2:14524818-14525618 FORWARDmoderately similar to ( 466) CB22_ORYSA Chlorophyll a-b binding protein 2, chloroplast precursor (LHCII type I CAB-2) (LHCP) - Oryza sativa (Rice)Chloroa_b-bind protein|chlorophyll A-B binding protein, putative, expressed	2.5
	1.1.2.2	PS.lightreaction.photosystem I.PSI polypeptide subunits	os03g0778100	Transcript	moderately similar to ( 253) AT1G31330 | Symbols: PSAF | PSAF (photosystem I subunit F) | chr1:11215011-11215939 REVERSEmoderately similar to ( 284) PSAF_HORVU Photosystem I reaction center subunit III, chloroplast precursor (Light-harvesting complex I 17 kDa protein) (PSI-F) - Hordeum vulgare (Barley)PSI_PsaF psaF protein|photosystem I reaction center subunit III, chloroplast precursor, putative…	1.4
	1.1.5.1	PS.lightreaction.other electron carrier (ox/red).plastocyanin	os06g0101600	Transcript	weakly similar to ( 130) AT1G20340 | Symbols: DRT112, PETE2 | DRT112; copper ion binding / electron carrier | chr1:7042770-7043273 REVERSEmoderately similar to ( 226) PLAS_ORYSA Plastocyanin, chloroplast precursor - Oryza sativa (Rice)Copper-bind PRK02710 PetE protein|plastocyanin, chloroplast precursor, putative, expressed	4.5
	1.1.5.2	PS.lightreaction.other electron carrier (ox/red).ferredoxin	os05g0443500	Transcript	weakly similar to ( 150) AT2G27510 | Symbols: ATFD3 | ATFD3 (ferredoxin 3); 2 iron, 2 sulfur cluster binding / electron carrier/ iron-sulfur cluster binding | chr2:11758281-11758748 REVERSEmoderately similar to ( 207) FER6_MAIZE Ferredoxin-6, chloroplast precursor (Ferredoxin VI) (Fd VI) - Zea mays (Maize)petF fer2 protein|2Fe-2S iron-sulfur cluster binding domain containing protein, expressed	1.6
	1.1.5.2	PS.lightreaction.other electron carrier (ox/red).ferredoxin	os08g0104600	Transcript	weakly similar to ( 158) FER1_ORYSA Ferredoxin-1, chloroplast precursor (Ferredoxin I) (Anti-disease protein 1) - Oryza sativa (Rice) protein|2Fe-2S iron-sulfur cluster binding domain containing protein, expressed	1.6
	1.1.5.3	PS.lightreaction.other electron carrier (ox/red).ferredoxin reductase	os02g0103800	Transcript	highly similar to ( 501) AT5G66190 | Symbols: ATLFNR1 | FNR1 (FERREDOXIN-NADP(+)-OXIDOREDUCTASE 1); NADPH dehydrogenase/ electron transporter, transferring electrons within the cyclic electron transport pathway of photosynthesis/ electron transporter, transferring electrons within the noncyclic electron transp | chr5:26451203-26452616 REVERSEhighly similar to ( 522) FENR1_ORYSA Ferredoxin--NADP r…	1
	1.1.5.3	PS.lightreaction.other electron carrier (ox/red).ferredoxin reductase	os06g0107700	Transcript	highly similar to ( 551) AT1G20020 | Symbols: ATLFNR2 | FNR2 (FERREDOXIN-NADP(+)-OXIDOREDUCTASE 2); NADPH dehydrogenase/ oxidoreductase/ poly(U) binding | chr1:6942851-6944868 FORWARDhighly similar to ( 656) FENR1_ORYSA Ferredoxin--NADP reductase, leaf isozyme, chloroplast precursor (EC 1.18.1.2) (FNR) - Oryza sativa (Rice) CysJ NAD_binding_1 PRK06214 cysJ protein|ferredoxin--NADP reductase, chlo…	1.3
	1.1.5.4	PS.lightreaction.other electron carrier (ox/red).ferredoxin oxireductase	os01g0949400	Transcript	moderately similar to ( 311) AT3G09150 | Symbols: HY2, GUN3 | HY2 (ELONGATED HYPOCOTYL 2); phytochromobilin:ferredoxin oxidoreductase | chr3:2803665-2805333 FORWARDFe_bilin_red protein|phycoerythrobilin ferredoxin oxidoreductase, putative, expressed	1.1
	1.1.40	PS.lightreaction.cyclic electron flow-chlororespiration	os03g0847500	Transcript	very weakly similar to (95.1) AT4G22260 | Symbols: IM, IM1 | IM (IMMUTANS); alternative oxidase | chr4:11769967-11772350 REVERSE protein|plastid terminal oxidase, putative, expressed	-1
	1.1.40	PS.lightreaction.cyclic electron flow-chlororespiration	os04g0668900	Transcript	moderately similar to ( 288) AT4G22260 | Symbols: IM, IM1 | IM (IMMUTANS); alternative oxidase | chr4:11769967-11772350 REVERSEAOX protein|immutans protein, putative, expressed	1
	21.2.1	redox.ascorbate and glutathione.ascorbate	os07g0694700	Transcript	moderately similar to ( 269) AT1G07890 | Symbols: APX1, CS1 | APX1 (ascorbate peroxidase 1); L-ascorbate peroxidase | chr1:2438005-2439435 FORWARDmoderately similar to ( 327) APX2_ORYSA L-ascorbate peroxidase 2, cytosolic (EC 1.11.1.11) (APXb) (OsAPx02) - Oryza sativa (Rice)ascorbate_peroxidase plant_peroxidase peroxidase KatG protein|OsAPx2 - Cytosolic Ascorbate Peroxidase encoding gene 4,5,6,8,…	-2.2
[truncated: 18 more rows]

## Sheet: Table S6
	Supplementary Table S6 : MapMan-based metabolism overview of 1,064 NUE- related DEGs
	BinCode	BinName	Id	Type	Description	Expression value (log2FC)
[truncated: 89 more rows]

## Sheet: Table S7
Supplementary Table S7: Sub cellular localization of 1,064 NUE- gene products
[truncated: 1,055 more rows]

[truncated: 16 more sheets: Table S8, Table S9, TableS10, TableS11, Table S12, Table S13, Table S14, Table S15, Table S16, Table S17, Table S18, Table S19, Table S20, Table S21, Table S22, Table S23]
